# Supplementary material for: Data from the Indian drug regulator and from Clinical Trials Registry-India does not always match
Source: Front Med (Lausanne). 2024 Feb 15;11:1346208. doi: 10.3389/fmed.2024.1346208 (PMC10906088; doi:10.3389/fmed.2024.1346208)
Supplement: Supplementary file 5 [file Data_Sheet_5.xls]

## Sheet: Legend and Covering note
Supplementary File S5. Comparing the drug interventions of the trials in 290 CDSCO-issued letters and the corresponding records in CTRI
Sheet name	Description	Number of records
290	In manually comparing the titles of the pdfs and CTRI records, the identical cases, or those with synonyms	290
271 green	In manually comparing the drug interventions of the pdfs and CTRI records, the identical cases, or those with synonyms	271
19 red	In manually comparing the drug interventions of the pdfs and CTRI records, the non-matches	19

## Sheet: 290
Pdf_name	CTRI_Page_number	CTRI_no	pdf_title	ctri_scientific_title	Similarity_score	Pdf_Drug_name	CTRI_Drug_name	Pdf_Date	CTRI_Registration_date	Pdf_Composition	Pdf_Dosage	CTRI_Intervention	Pdf_Indication	CTRI_Indication	Pdf_Sites	CTRI_Sites_data
Sr. No. 69 CT-40-22-Novartis.pdf .txt.csv	67297	CTRI/2022/07/044378 [Registered on: 27/07/2022] Trial Registered Prospectively	a multi-center, randomized, double-blind, placebo-controlled, parallel-group phase iii b study evaluating the effect of inclisiran on atherosclerotic plaque progression assessed by coronary computed tomography angiography (ccta) in participants with a diagnosis of non-obstructive coronary artery disease without previous cardiovascular events (victorion-plaque).	a multi-center, randomized, double-blind, placebo-controlled, parallel-group phase iiib study evaluating the effect of inclisiran on atherosclerotic plaque progression assessed by coronary computed tomography angiography (ccta) in participants with a diagnosis of non-obstructive coronary artery disease without previous cardiovascular events (victorion-plaque)	0.989041	KJX839.	Inclisiran (KJX839)	4. New Delhi and the date is not mentioned in the prompt.	27/07/2022	KJX839 = 284.0000 mg In House Specification Active.	Solution for injection prefilled syringe.	Inclisiran sodium 300 mg (equivalent to 284 mg inclisiran) in 1.5 mL given as subcutaneously_x000D_ _x000D_ Participant would receive one injection on Day 1, then on day 90 and then every 6 months thereafter._x000D_ _x000D_ total duration of treatment is 21 Months	Atherosclerotic Plaque Progression.	(1) ICD-10 Condition: I251||Atherosclerotic heart disease of native coronary artery,	: - Fortis Escorts Heart Institute, Okhla, New Delhi - 110025 Ethics committee details: Institutional Ethics Committee, Room No A-23, 2nd Floor, RC Building Residential Tower, Okhla Road New Delhi-110025, ECR/261/Inst/DL/2013/RR-19, Name of investigator: Dr. Mona Bhatia - Fortis Hospital, 730 Anandapur, EM Bypass Road, Kolkata, West Bengal-700107 Ethics committee details: Fortis Hospital Ethics C…	Site 1 : All India Institute of Medical Sciences(AIIMS) Room no 97, 7th floor, Cardio Thoracic Sciences Center, Ansari Nagar, New Delhi-110029, IndiaEastDELHI. Name of principal investigator: Dr Ramakrishnan Sivasubramanian. Site 2 : Apollo Hospitals No 21, Greams Lane, Off Greams Lane Road, Chennai-600006, Tamil Nadu, IndiaChennaiTAMIL NADU. Name of principal investigator: Dr Abraham Oomman. Sit…
Sr. No. 112 CT-96-21-Medpace.pdf .txt.csv	62398	CTRI/2022/01/039661 [Registered on: 21/01/2022] Trial Registered Prospectively	\randomized, double-blind, placebo-controlled, phase 3 study to evaluate the long-term efficacy and safety of lib003 in patients with cardiovascular disease on stable lipid-lowering therapy requiring additional low-density lipoprotein cholesterol reduction (liberate-cvd)\.,	randomized, double-blind, placebo-controlled, phase 3 study to evaluate the long-term efficacy and safety of lib003 in patients with cardiovascular disease on stable lipid-lowering therapy requiring additional low-density lipoprotein cholesterol reduction (liberate-cvd)	0.989011	\LIB003\.,	LIB003	\Place: New Delhi, Date: not specified\.,	21/01/2022	is \LIB003 = 250.0000 mg/ml U.S.P. Inactive\.,	\Sterile solution for injection\.,	Study drug (LIB003 or placebo) will be administered by SC injection in either the abdomen, thigh or upper arm (which may be rotated) on Day 1 and Weeks 4, 8, 12, 16, and 20	\Low-density lipoprotein cholesterol (LDL-C) patients with atherosclerotic cardiovascular (CV) disease (ASCVD), high risk of ASCVD, or homozygous familial hypercholesterolemia (HoFH) or heterozygous familial hypercholesterolemia (HeFH) without CV disease (CVD) who required additional LDL-C reduction\.,	(1) ICD-10 Condition: I251||Atherosclerotic heart disease of native coronary artery, (2) ICD-10 Condition: E780||Pure hypercholesterolemia, (3) ICD-10 Condition: E11||Type 2 diabetes mellitus,	provided in an annexure, which includes the names and addresses of the clinical trial sites, the ethics committee details, ECR number beginning with 'ECR', and name of the investigator." )	Site 1 : Sanjay Gandhi Postgraduate Institute of Medical Sciences Department of Cardiology, Sanjay Gandhi Postgraduate Institute of Medical Sciences, Raebareli Road , Lucknow 226014LucknowUTTAR PRADESH. Name of principal investigator: Dr Aditya Kapoor. Site 2 : "Care Institute of Medical Sciences " " Near. Shukan Mall, Off. Science City Road, Sola , Ahmedabad-38060, Gujarat, India" AhmadabadGUJAR…
41_Biological E MR.pdf .txt.csv	66049	CTRI/2022/03/040874 [Registered on: 07/03/2022] Trial Registered Prospectively	\a phase i open label study to evaluate the safety, tolerability and immunogenicity of biological e’s live, attenuated measles rubella vaccine (mr) in 4-5 year old healthy children\.,	a phase i open label study to evaluate the safety, tolerability and immunogenicity of biological e’s live, attenuated measles rubella vaccine (mr) in 4-5 year old healthy children.	0.989011	The names of the drug are \Measles (Edmonston Zagreb) and Rubella (RA27/3) Vaccine Live, Attenuated (Freeze Dried), IP\.,	Measles-Rubella Vaccine (Freeze-dried) Live, attenuated I.P. of BE Ltd.	4. \New Delhi\ and \28-DEC-2021\.,	07/03/2022	The composition of the new drug, differentiated in active and inactive ingredients, is provided in the prompt.,	\Lyophilized powder for Subcutaneous injection upon reconstitution with sodium chloride-0.w/v\.,	BE’s live attenuated Measles-Rubella vaccine, 0.5 mL per dose to be administered subcutaneously on day 0.	\For active immunization against infection Measles and Rubella Viruses\.,	For active immunization for the prevention of disease caused by Measles and Rubella viruses	" provided in the prompt. The first site is Cheluvamba Hospital, Mysore Medical College and Research Institution, Irwin Road, Mysore. The ethics committee details for this site are Institutional Ethics Committee, Mysore Medical College and Research Institute, Irwin Road Mysuru, Karnataka–570001, India. The ECR number for this site is \"ECR/134/Inst/KA/2013/RR-19\". The name of the principal inves…	Site 1 : Cheluvamba Hospital Dept. of Paediatrics, ground floor, Immunization room, Cheluvamba Hospital Mysore Medical College & Research Institute, Irwin Road-570001MysoreKARNATAKA. Name of principal investigator: Dr S Prashanth
66.pdf .txt.csv	75374	CTRI/2022/11/047188 [Registered on: 10/11/2022] Trial Registered Prospectively	\a double blind, balanced, randomized, two-treatment, two-sequence, two-period, single dose, crossover, pharmacokinetic and pharmacodynamic bioequivalence study of gen1503pr (insulin aspart (r-dna origin) injection) 100 u/ml of genesys biologics pvt. ltd. hyderabad, india and novorapid® (insulin aspart (r-dna origin) injection) 100 u/ml of novo nordisk, in healthy adult, male human subjects using…	a double blind, balanced, randomized, two-treatment, two-sequence, two-period, single dose, cross over, pharmacokinetic and pharmacodynamic bioequivalence study of gen1503pr (insulin aspart (r-dna origin) injection) 100 u/ml of genesys biologics pvt. ltd. hyderabad, india and novorapid® (insulin aspart (r-dna origin) injection) 100 u/ml of novo nordisk, in healthy adult, male human subjects using…	0.988987	GEN1503PR (Insulin Aspart (r-DNA origin) Injection) 100 U/mL of GeneSys Biologics Pvt. Ltd. Hyderabad, India and NovoRapid® (Insulin Aspart (r-DNA origin) Injection) 100 U/mL of Novo Nordisk.,	GEN1503PR	4. New Delhi, 30.09.2021.,	10/11/2022	Insulin Aspart (r-DNA Origin) Units (3.5 mg), Zinc as Zinc Chloride 0.0196 mg (Zinc), m-Cresol 1.72 mg, Glycerol 16.0 mg, Phenol 1.50 mg, Disodium Hydrogen Phosphate Dihydrate 1.25 mg, Sodium Chloride 0.58 mg, Sodium Hydroxide q.s. to pH 7.4, Hydrochloric Acid q.s. to pH 7.4, and Water for Injection q.s. to 1 mL.,	a solution for injection intended for subcutaneous administration. GeneSys Insulin Aspart (r-DNA origin) Injection 100 units/mL is in a 3 mL cartridge system for use in a reusable insulin delivery device & 3 mL disposable insulin delivery device.,	Dose: 0.3 IU/kg_x000D_ Frequency: Single Dose_x000D_ Route of Administration: Subcutaneous_x000D_ Duration of the study: Total expected duration of the study will be of at least 07 days (including_x000D_ the 11.00 hours prior to dosing in period 01 till discharge in period 02). The_x000D_ washout period will be at least 05 days.	Type I and Type II Diabetes Mellitus.,	Healthy	" :", "- Name and Address of Clinical Trial Site: Jeevan Scientific Technology Ltd. Clinical Pharmacology center, B-17, TIE, Phase II, Balanagar, Hyderabad-500 037, India.\n- Ethics Committee Details: Institutional Ethics Committee, Vasavi Medical & Research Centre Vasavi Hospital, # 6-1-91, Opp. Sensation Theatre, Lakdikapool, Khairatabad, Hyderabad- 500004, India. ECR/139/Inst/AP/2013/RR-19\n- …	Site 1 : ADVITY Research Pvt. Ltd., 3rd & 4th Floors, Archies Continental, Adj: Kukatpally Metro station, KukatpallyHyderabadTELANGANA. Name of principal investigator: Dr Sowmya Bondalapati
Sr. No. 43 CT-30-20-Cliantha.pdf .txt.csv	45746	CTRI/2020/08/027186 [Registered on: 17/08/2020] Trial Registered Prospectively	a randomised, multiple-dose, multicentre, three-arm, parallel study to compare the efficacy and safety of pregabalin er tablet of alvogen malta (out-licensing) ltd. to placebo and lyrica® (pregabalin) hard capsule of pfizer in subjects with peripheral neuropathic pain.	a randomised, multiple-dose, multicentre, three- arm, parallel study to compare the efficacy and safety of pregabalin er tablet of alvogen malta (out-licensing) ltd. to placebo and lyrica® (pregabalin) hard capsule of pfizer in subjects with peripheral neuropathic pain.	0.98893	Pregabalin ER Tablets.	Pregabalin ER Tablet of Alvogen Malta (Out-Licensing) Ltd	4. Place: New Delhi, Date: Not specified.	17/08/2020	The composition of the new drug: Pregabalin = 82.5000 milligram (mg) In House Specification, U.S.P. Active, Pregabalin = 165.0000 milligram (mg) In House Specification, U.S.P. Active, Pregabalin = 330.0000 milligram (mg) In House Specification, U.S.P. Active.	Tablets.	Orally within 1 hour after completion of Meal : Single Dose : minimum 165 mg to increase gradually maximum 660 mg in first 4 week (with dose titration up or down by 82.5 mg/day or 165 mg/day); after that will be continued in a fixed manner till Week 13 & following week 14 is Dose Tapering.	Peripheral Neuropathic Pain.	(1) ICD-10 Condition: G629||Polyneuropathy, unspecified,	: - Aman Hospital and Research Center, 15 Shashwat, Opp ESI Hospital, Gotri Road, Vadodara-390021, Gujarat. Ethics committee details: Institutional Ethics Committee, Aman Hospital and Research Center, 15 Shashwat, Opp ESI Hospital, Gotri Road, Vadodara-390021, Gujarat. ECR/857/Inst/GJ/2016/RR-19. Name of investigator: Dr Aman Romesh Khanna. - Shivam Hospital, 2nd Floor, C-4, Satyanarayan Society,…	Site 1 : AIG Hospitals Room No:07, Facility Building ,Mindspace Road, Gachibowli, Hyderabad, Telangana-500032HyderabadTELANGANA. Name of principal investigator: Dr P Naveen Chander Reddy. Site 2 : All India Institute of Medical Sciences (AIIMS), Neurosciences Room No. 705, 7th Floor, Ansari Nagar, New Delhi, Delhi - 110029, India. New DelhiDELHI. Name of principal investigator: Dr Manjari Triapat…
sr. No. 106 CT-77-21-CBCC.pdf .txt.csv	63962	CTRI/2021/12/038850 [Registered on: 22/12/2021] Trial Registered Prospectively	\a randomized, double-blind, placebo-controlled, phase 3 study to evaluate the efficacy and safety of proxalutamide (gt0918) in outpatients with mild to moderate covid-19 illness\. ,	a randomized, double-blind, placebo-controlled, phase 3 study to evaluate the efficacy and safety of proxalutamide (gt0918) in outpatients with mild to moderate covid-19 illness.	0.988889	Proxalutamide (GT0918). ,	Proxalutamide	of the document are New Delhi and not explicitly stated, respectively. ,	22/12/2021	active ingredient Proxalutamide (25mg or 100mg) and inactive ingredients Starch, Hydroxypropyl methyl cellulose E6, Low-substituted hydroxypropyl cellulose, Magnesium stearate, and Opadry® II II 85G62867. ,	tablets. ,	Dosage: 200 mg,_x000D_ Frequency: Once daily,_x000D_ Route of Administration: Oral,_x000D_ Duration of Therapy: 14 Days	mild to moderate COVID-19 illness. ,	(1) ICD-10 Condition: B972||Coronavirus as the cause of diseases classified elsewhere,	BGS Global Institute of Medical Sciences & Hospital, #67, BGS Health & Education City, Uttarahalli Road, Kengeri, Bangalore South-560060, Karnataka, India (ECR/1307/Inst/KA/2019, Dr. M. E. Mohan) and Rajarajeswari Medical College and Hospital, 202 Mysore Road, Kengeri Satellite Town, Kambipura, Bangalore-560074, Karnataka, India (IEC Rajarajeswari Medical College and Hospital, ECR/56/Inst/KA/2013…	Site 1 : BGS Global Institute of Medical Sciences and Hospital #67, BGS Health & Education City, 2nd floor, medical college building, Uttarahalli Road Kengeri, Bangalore South – 560060, Karnataka, IndiaBangaloreKARNATAKA. Name of principal investigator: Dr ME Mohan. Site 2 : Rajarajeswari Medical College and Hospital Ground floor, OPD Building, 202, Mysore Road, Kengeri Satellite Town, Kambipura,…
2-Deoxy-D-Glucose (2-DG).pdf .txt.csv	44369	CTRI/2020/06/025664 [Registered on: 05/06/2020] Trial Registered Prospectively	a randomized, open label, 2-treatment groups clinical trial evaluating the safety and efficacy of 2-deoxy-d-glucose as an adjunctive therapy to standard of care, in comparison to standard of care alone, in the acute treatment of moderate to severe covid -19 patients.	a randomized, open label, 2-treatment groups clinical trial evaluating the safety and efficacy of 2-deoxy-d-glucose as an adjunctive therapy to standard of care, in comparison to standard of care alone, in the acute treatment of moderate to severe covid -19 patients	0.988848	2-Deoxy-D-Glucose (2-DG).	2-Deoxy-D-Glucose Oral Powder	4. FDA Bhawan, Kotla Road, New Delhi-110002, dated 21st May 2020.	05/06/2020	2/5/10 gram (g) sachet, each sachet containing 2/5/10 gram (g) I.P. active Deoxy-D-Glucose (2-DG).	oral powders.	45 mg/kg Morning + 18 mg/kg Evening as long as SoC is being administered, but no longer than discharge or Day 28 (whichever is earlier)	the acute treatment of moderate to severe COVID-19 patients.	(1) ICD-10 Condition: B972||Coronavirus as the cause of diseases classified elsewhere,	: - Site 1: GSVM Medical College and Hospital, Swaroop Nagar Kanpur -208002, Uttar Pradesh, India. Investigator: Dr. Apurva Agarwal, MBBS, MD. Ethics Committee: Ethics Committee GSVM Medical College. ECR number: ECR1680/lnstlUP/2014/RR-17. - Site 2: MGM Medical College, N-6 CIDCO, Aurangabad-431003, Maharashtra, India. Investigator: Dr. Anand Nikalje, MD, MBBS. Ethics Committee: MGM Ethics Commit…	Site 1 : Aakash Healthcare Super Speciality Hospital Department of Respiratory and Sleep Medicine, Hospital Plot Rd Number 201, Sector-3 DwarkaNew DelhiDELHI. Name of principal investigator: Dr Akshay Budhraja. Site 2 : BGS Global Institute of Medical Sciences Professor and HOD, General Medicine, #67, BGS Health and Education City, Uttarhalli Road, Kengeri, Bengaluru – 560060BangaloreKARNATAKA. N…
Sr. No. 35 Ct-116-22-CliniRx.pdf .txt.csv	84100	CTRI/2023/05/052172 [Registered on: 01/05/2023] Trial Registered Prospectively	\a phase 2b, multicenter, 30-week, prospective, cross-over, double blind, randomized, placebo-controlled study followed by a 52-week open-label extension study to evaluate the efficacy and safety of basimglurant adjunctive to ongoing anticonvulsive therapy in children, adolescents, and young adults with seizures associated with tuberous sclerosis complex\.,	a phase 2b, multicenter, 30-week, prospective, cross-over, double-blind, randomized, placebo-controlled study followed by a 52-week open-label extension study to evaluate the efficacy and safety of basimglurant adjunctive to ongoing anticonvulsive therapy in children, adolescents, and young adults with seizures associated with tuberous sclerosis complex	0.988827	The names of the drug are NOE 101 and Basimglurant.,	Basimglurant (NOE-101)	4. New Delhi, and the date is not specified in the prompt.,	01/05/2023	Basimglurant = 0.5000 milligram(mg) U.S.P., Ph. Eur Active and Basimglurant = 1.0000 milligram(mg) U.S.P., Ph. Eur Active.,	Capsules.,	Fixed oral doses of 0.5mg, 1 mg OD orally for 82 weeks therapy of NOE-101 adjunctive to ongoing Anticonvulsive therapy.	Tuberous Sclerosis.,	(1) ICD-10 Condition: Q851||Tuberous sclerosis,	" :", "- Rainbow Children’s Hospital, Road No. 2, Banjara Hills, Hyderabad-500034, India. Ethics committee details: Rainbow Children’s Medicare Ethics Committee, Rainbow Children’s Hospital, Road No. 2, Banjara Hills, Hyderabad-500034, India. ECR/899/Inst/TG/2016/RR-21. Name of investigator: Dr. Lokesh Lingappa.", "- Jaslok Hospital & Research Centre, 9th floor, Pediatric Research Department, 15,…	Site 1 : AIIMS Room no 805, A wing, 8th floor, Mother & child Block, Child neurology division, Department of Pediatrics, AIIMS, New Delhi -110029, IndiaCentralDELHI. Name of principal investigator: Dr Sheffali Gulati. Site 2 : Christian Medical College Room no 910, West Block, First floor, Pediatric Neurology Unit, Department of Neurological Sciences, Christian Medical College, IDA Scudder Rd, Ve…
Sr. No. 46-21-labcorp CT-76.pdf .txt.csv	65480	CTRI/2022/05/042839 [Registered on: 26/05/2022] Trial Registered Prospectively	\a phase iii, open label, randomised, 3-arm, multi-centre study of savolitinib plus durvalumab versus sunitinib and durvalumab monotherapy in participants with met-driven, unresectable and locally advanced or metastatic papillary renal cell carcinoma (prcc) (sameta)\.,	a phase iii, open label, randomised, 3-arm, multi-centre study of savolitinib plus durvalumab versus sunitinib and durvalumab monotherapy in participants with met-driven, unresectable and locally advanced or metastatic papillary renal cell carcinoma (prcc) (sameta)	0.988806	Savolitinib (AZD6094, HMPL-504, Volitinib).,	Durvalumab	New Delhi and the date is not mentioned in the prompt.,	26/05/2022	is Savolitinib = 200.00 mg In House Specification Active.,	a Tablet (Bottle pack and each bottle contains 24 Tabs).,	Dose: 1500 mg _x000D_ Dose Frequency: 1500 mg durvalumab Q4W or 20 mg/kg in_x000D_ participants who weigh ≤ 30 kg Q4W_x000D_ Route of administration: IV infusion_x000D_ Duration of therapy: every 4 weeks	the treatment of patients with (MET-driven) cancer.,	, (1) ICD-10 Condition: C649||Malignant neoplasm of unspecifiedkidney, except renal pelvis,	as follows:", "1. Somani Hospital, 277 Shri Gopal Nagar, 80 Feet Road, Gopalpura Byepass, Jaipur-302019, Rajasthan. Ethics committee details: Somani Hospital Ethics Committee, 277 Shri Gopal Nagar, 80 Feet Road, Gopalpura Byepass, Jaipur-302019, Rajasthan. ECR number: ECR/108/Inst/RJ/2013. Name of the Investigator: Dr. Naresh Somani.", "2. TATA Memorial Hospital, Dr. Ernest Borges Road, Parel (Ea…	Site 1 : HCG Manavata Cancer Centre Behind Shivang Auto, Mumbai Naka, Nashik 422002NashikMAHARASHTRA. Name of principal investigator: Dr Rajnish Nagarkar. Site 2 : HealthCare Global Enterprises Ltd # 8, HCG Towers, P. Kalinga Rao Road, Sampangi Ram Nagar, Bangalore – 560 027BangaloreKARNATAKA. Name of principal investigator: Dr Raghunath Krishnappa. Site 3 : K.L.E.S. Dr. Prabhakar Kore Hospital &…
Sr. No. 90 CT-37-22-Ms. PRA-CTNOC.pdf .txt.csv	68619	CTRI/2022/12/048448 [Registered on: 23/12/2022] Trial Registered Prospectively	\a phase 3 (pivotal stage) study of nbtxr3 activated by investigator’s choice of radiotherapy alone or radiotherapy in combination with cetuximab for platinum-based chemotherapy-ineligible elderly patients with locally advanced head & neck squamous cell carcinoma\	a phase 3 (pivotal stage) study of nbtxr3 activated by investigator’s choice of radiotherapy alone or radiotherapy in combination with cetuximab for platinum-based chemotherapy-ineligible elderly patients with locally advanced head & neck squamous cell carcinoma	0.988679	Hafnium oxide PO4 and Water for Injection	NBTXR3/Radiotherapy (RT)± cetuximab	of the document are New Delhi and it does not mention the date explicitly	23/12/2022	is Hafnium Oxide = 315.0000 milligram (mg) In House Specification Active, PO4 = 5.0000 milligram (mg) In House Specification Inactive, Water for Injection = QS 5 mL In House Specification	Suspension	Suspension of inert, crystalline hafnium oxide particles, designed to generate oxygen free radicals to destroy cancer cells after activation by ionizing radiation._x000D_ NBTXR3 injection volume is calculated as a percentage of the computed Gross Tumor Volume (GTV) contour of the lesion(s) by MRI, as determined by the Investigator._x000D_ The product dose is 33% of the GTV of the lesion(s)._x000D…	Locally advanced head & neck squamous cell carcinoma.,	(1) ICD-10 Condition: C760||Malignant neoplasm of head, face and neck,	as follows:", "1. MS Ramaiah Medical College and Hospitals, MS Ramaiah Nagar, MSRIT Post, Bangalore-560054, Karnataka, India. Ethics committee details: Ethics Committee, MS Ramaiah, MS Ramaiah Medical College and Hospitals, MS Ramaiah Nagar, MSRIT Post, Bangalore-560054, Karnataka, India. ECR number: ECR/215/Inst/KA/2013/RR-19. Name of the investigator: Dr. Kirthi Koushik A S.", "2. Meenakshi Mis…	Site 1 : Apollo specialty hospital No: 320, Padma complex, Anna salai, Teynampet, Chennai - 600035ChennaiTAMIL NADU. Name of principal investigator: Dr Mahadev Potharaju. Site 2 : Grant Medical Foundation Ruby Hall Clinic, Department of Oncology, 40, Sassoon Road, Pune - 411 001PuneMAHARASHTRA. Name of principal investigator: Dr Minish Mahendra Jain. Site 3 : HCG Manavata Cancer Centre Behind Shi…
Sr. No. 73 CT-45-22-Ms.PPD.pdf .txt.csv	72275	CTRI/2022/09/045928 [Registered on: 27/09/2022] Trial Registered Prospectively	a randomized, double-blind, dose finding and comparison study of the safety and efficacy of a high dose of eteplirsen, preceded by an open-label dose escalation, in patients with duchenne muscular dystrophy with deletion mutations amenable to exon 51 skipping.	a randomized, double-blind, dose finding and comparison study of the safety and efficacy of a high dose of eteplirsen, preceded by an open-label dose escalation, in patients with duchenne muscular dystrophy with deletion mutations amenable to exon 51 skipping	0.98855	Eteplirsen (AVI-4658).	Eteplirsen 100 mg/kg	4. Place: New Delhi, Date: not mentioned.	27/09/2022	Eteplirsen = 50.0000 mg/ml In House Specification Active.	Injection.	Dose : 100 mg/kg _x000D_ Route of Administration : Intravenous_x000D_ Frequency: Once weekly before the selection of the high dose occurs and then will receive the selected high dose once weekly _x000D_ Total Duration: Up to 144 weeks.	Duchenne Muscular Dystrophy.	(1) ICD-10 Condition: G710||Muscular dystrophy,	provided in the Annexure of the document. The names and addresses of the clinical trial sites are: 1. All India Institute of Medical Sciences, Department of Paediatrics Neurology, Teaching Block, 3rd Floor, Ansari Nagar, New Delhi - 110029, India 2. Aster AV Hospital, CA,37 24th Main Rd, ITI layout 1st Phase, J.P. Nagar, Bangaluru, Karnataka-560078, India 3. Deenanath Mangeshkar Hospital and Rese…	Site 1 : All India Institute of Medical Sciences Dept of Paediatrics Neurology, Teaching Block, 3rd Floor, Room # 3056, Ansari Nagar, New-Delhi - 110029, India New DelhiDELHI. Name of principal investigator: Dr Sheffali Gulati. Site 2 : Aster RV Hospital 4th Floor, Department of Paediatrics, CA, #37, 24th main road, ITI Layout, 1st Phase, J.P Nagar, Bengaluru, Karnataka -560078, IndiaBangaloreKAR…
Sr. No. 26 Ct-136-22-AstraZeneca.pdf .txt.csv	82128	CTRI/2023/04/051492 [Registered on: 11/04/2023] Trial Registered Prospectively	\an international, randomized, double-blind, placebo-controlled study to evaluate the effect of sodium zirconium cyclosilicate on arrhythmia-related cardiovascular outcomes in participants on chronic hemodialysis with recurrent hyperkalemia (dialize-outcomes).\,	an international, randomized, double-blind, placebo-controlled study to evaluate the effect of sodium zirconium cyclosilicate on arrhythmia-related cardiovascular outcomes in participants on chronic hemodialysis with recurrent hyperkalemia (dialize-outcomes)	0.988506	Sodium Zirconium Cyclosilicate (SZC) Powder for oral suspension 5g or Placebo.,	Type Name Details Intervention Sodium Zirconium Cyclosilicate or matching placebo 5 to 15 g SZC QD on non-dialysis days Comparator Agent Sodium Zirconium Cyclosilicate or matching placebo 5 to 15 g SZC QD on non-dialysis days	of the document are New Delhi and not explicitly stated, but it can be assumed to be close to the date of the application, which is 02-11-2022.,	11/04/2023	is Sodium Zirconium Cyclosilicate (SZC) = 5.0000 gram (g) In House Specification Active and Sodium Zirconium Cyclosilicate (SZC) = 10.0000 gram (g) In House Specification Active.,	Powder for oral suspension.,	Type	the effect of SZC on Arrhythmia-Related Cardiovascular Outcomes in Participants on Chronic Hemodialysis with Recurrent Hyperkalemia.,	(1) ICD-10 Condition: E875||Hyperkalemia,	as follows:", "1. Jawaharlal Institute of Postgraduate Medical Education and Research (JIPMER), JIPMER Campus Road, Dhanvantari Nagar, Gorimedu, Puducherry, 605-006, India, Ethics committee details: JIPMER Institutional Ethics Committee-Interventional Studies, Room No. 103, First Floor, Administrative Block, JIPMER, Puducherry, ECR/342/Inst/PY/2013/RR-19, Name of investigator: Dr. Sreejith Parame…	Site 1 : Jawaharlal Institute of Postgraduate Medical Education and Research (JIPMER) Department of Nephrology, JIPMER Campus Road, JIPMER Campus, Dhanvantari Nagar, Puducherry – 605006 PondicherryPONDICHERRY. Name of principal investigator: Dr Sreejith Parameswaran. Site 2 : K D Hospital Department of Nephrology, Vaishnavdevi Circle, S.G.Highway, Ahmedabad Gujarat – 382421AhmadabadGUJARAT. Name …
5.Biological E.pdf .txt.csv	59430	CTRI/2021/10/037067 [Registered on: 04/10/2021] Trial Registered Prospectively	a single blind randomised active-controlled phase-iii study to evaluate safety and immunogenicity of a candidate 14-valent pneumococcal polysaccharide conjugate vaccine administered to 6-8 weeks old healthy indian infants in 6-10 -14 weeks dosing schedule.	a single blind randomised active-controlled phase-iii study to evaluate safety and immunogenicity of a candidate 14-valent pneumococcal polysaccharide conjugate vaccine administered to 6-8 weeks old healthy indian infants in 6-10-14 weeks dosing schedule.	0.988372	Pneumococcal Polysaccharide Conjugate Vaccine (Adsorbed) (14 Valent).	Pneumococcal polysaccharide Conjugate Vaccine (Adsorbed) (14 Valent)-MHD	4. Place: New Delhi, Date: 05-MAR-2021.	04/10/2021	: - Active ingredients: Pneumococcal Polysaccharide Serotype 1, Pneumococcal Polysaccharide Serotypes 3, 4, 5, 7F, 9V, 14, 18C, 19A, 19F, 22F, 23F and 33F, Pneumococcal Polysaccharide Serotype 6B. - Inactive ingredients: Adsorbed onto Aluminum Phosphate, as Al+++, Succinic Acid, Polysorbate 20, 0.6% w/v Sodium Chloride Solution, 2-Phenoxyethanol, 1 N Sterile Hydrochloric Acid Solution, 1 N Steril…	Suspension for Intramuscular injection.	1. Dose:0.5 mL three dose schedule 2. Frequency: three doses administered 28 days apart doses, at Day 0, Day 28 & Day 56 respectively. 3. Route of administration: Intramuscular injection in the vastus lateralis muscle on anterolateral aspect of thigh 4.Total duration of therapy: 86 days	For active immunization for the prevention of disease caused by Streptococcus pneumonia serotypes 1, 3, 4, 5, 6B, 7F, 9V, 14, 18C, 19A, 19F, 22F, 23F and 33 F in infants ages 6-8 weeks at first dose.	Preventive protection against Pneumococcal disease caused by the vaccine serotypes.	: - Site 1: King George Hospital, Andhra Medical College, Visakhapatnam –530 002. Ethics Committee details: Institutional Ethics Committee, King George Hospital, Maharani pet, Collector Office Junction, Visakhapatnam-530 002, India. Name of Principal Investigator: Dr. P. Venugopal. - Site 2: Guru Teg Bahadur Hospital, Dilshad Garden, North East Delhi –110 095, India. Ethics Committee details: Gur…	Site 1 : Belgavi Institute of Medical Sciences Ground floor, Dr B R Ambedkar Rd, Sadashiv Nagar, 590019, India.BelgaumKARNATAKA. Name of principal investigator: Dr Shailesh Patil. Site 2 : Cheluvamba Hospital Dept. of Paediatrics, ground floor, Cheluvamba Hospital Mysore Medical College & Research Institute, Irwin Road-570001MysoreKARNATAKA. Name of principal investigator: Dr S Prashanth. Site 3 …
Sr. No. 48 CT-11-21-Johnson & Johnson.pdf .txt.csv	52774	CTRI/2021/08/036009 [Registered on: 27/08/2021] Trial Registered Prospectively	a randomized phase 2 study of erdafitinib versus investigator choice of intravesical chemotherapy in subjects who received bacillus calmette-guérin (bcg) and recurred with high risk non-muscle-invasive bladder cancer (nmibc) and fgfr mutations or fusions.	a randomized phase 2 study of erdafitinib versus investigator choice of intravesical chemotherapy in subjects who received bacillus calmette-guérin (bcg) and recurred with high risk non-muscle-invasive bladder cancer (nmibc) and fgfr mutations or fusions	0.988327	Erdafitinib.	Erdafitinib	4. New Delhi, and the date is not specified.	27/08/2021	Erdafitinib = 4.0000 milligram (mg) U.S.P.,E.P. Active, Erdafitinib = 5.0000 milligram (mg) U.S.P.,E.P. Active, Erdafitinib = 3.0000 milligram (mg) U.S.P.,E.P. Active.	Tablets.	Participants will receive 8mg erdafitinib daily dose orally beginning on Cycle 1 Day 1 until 2 years of treatment have been completed, disease recurrence, intolerable toxicity, withdrawal of consent, a decision by the_x000D_ investigator to discontinue_x000D_ treatment, or study termination, whichever occurs first. Each_x000D_ cycle is of 28 days.	Non-Muscle-Invasive Bladder Cancer (NMIBC) and FGFR Mutations or Fusions.	(1) ICD-10 Condition: N33||Bladder disorders in diseases classified elsewhere,	- Muljibhai Patel Urological Hospital, Dr Virendra Desai Road, Nadiad-387001, Gujarat India, Ethics committee details: Muljibhai Patel Society for Research in Nephro-Urology, Ethics committee, ECR/276/Muljibhai/Inst/GJ/2013/RR-19, Name of investigator: Dr. Mahesh Ramanlal Desai. - Meenakshi Mission Hospital and Research Centre, Lake Area, Melur Road, Madurai, Tamil Nadu - 625107, Institutional Et…	Site 1 : Inamdar Multispecialty Hospital Survey No 15 Fatima Nagar Pune - 411040PuneMAHARASHTRA. Name of principal investigator: Dr Rajendra Shimpi. Site 2 : Meenakshi Mission Hospital and Research Center Clinical Research Department, Research room, Lake Area, Melur Road Madurai-625107 IndiaMaduraiTAMIL NADU. Name of principal investigator: Dr Ravichandran Ramaswamy. Site 3 : Muljibhai Patel Urol…
veeda omalizumab.pdf .txt.csv	71859	CTRI/2022/08/045092 [Registered on: 30/08/2022] Trial Registered Prospectively	a randomized, double blind, two-arm, parallel group, single dose comparative pk, pd and immunogenicity study comparing adl-018 lyophilized powder with us-licensed xolair lyophilized powder administered through subcutaneous route in healthy adult subjects.	a randomized, double blind, two-arm, parallel group, single dose comparative pk, pd and immunogenicity study comparing adl-018 lyophilized powder with us-licensed xolair lyophilized powder administered through subcutaneous route in healthy adult subjects	0.988327	Omalizumab (r-DNA origin) injection.	ADL-018 LYOPHILIZED POWDER	4. New Delhi, 31-May-2022.	30/08/2022	Omalizumab (r-DNA Origin) (ADL-018), L-Histidine, L-Histidine hydrochloride monohydrate, Polysorbate 20, and Sucrose. The quantity per vial is provided, and it is to be reconstituted with 1.4ml sterile water for injection USP.	Lyophilized powder in vial for injection (single-use vial).	Kashiv Bioscience LLC, USA_x000D_ _x000D_ Frequency: single dose_x000D_ Route of administration: subcutaneous_x000D_ No. of Units to be administered: Single subcutaneous injection 150 mg single dose vial with lyophilized powder will be administered on either the upper arm or the front and middle of the thighs.	Asthma, Chronic Idiopathic Urticaria, Nasal Polyps.	Male or female, non-smoker (no use of tobacco_x000D_ or nicotine products within 3 months prior to_x000D_ dosing)	provided in the Annexure. Site 1 is Veeda Clinical Research Limited, 2nd, 3rd, 4th floor, Shivalik Plaza, Near I.I.M., Ambawadi, Ahmedabad-380015, Gujarat, India. The Ethics Committee details are Sangini Hospital Ethics Committee C/o Sangini Hospital, 1st Floor, Santorini Square, B/h Abhishree Complex, Opp. Star Bazar, Nr. Jodhpur Cross Roads, Satellite, Ahmedabad-380015, Gujarat, India. The ECR …	Site 1 : Veeda Clinical Research Ltd. Shivalik Plaza-A, Near I.I.M., Ambawadi Ahmedabad-380015, IndiaAhmadabadGUJARAT. Name of principal investigator: Dr Hiren Prajapati. Site 2 : Veeda Clinical Research Ltd. Office no. 9, 10 and 11 1st, 2nd and 3rd Floor, Radhe Palladium, Panchot, 384205, IndiaMahesanaGUJARAT. Name of principal investigator: Dr Sunil Soitawala
Sr. No. 41 Ct-143-22-Novartis.pdf .txt.csv	77978	CTRI/2023/05/052406 [Registered on: 09/05/2023] Trial Registered Prospectively	: “a phase 3 randomized, double-blind study of ianalumab (vay736) versus placebo in addition to eltrombopag in patients with primary immune thrombocytopenia (itp) who had an insufficient response or relapsed after first line steroid treatment (vayhit2)”.,	a phase 3 randomized, double-blind study of ianalumab (vay736) versus placebo in addition to eltrombopag in patients with primary immune thrombocytopenia (itp) who had an insufficient response or relapsed after first line steroid treatment (vayhit2)	0.988095	The names of the drug are: VAY736 (Ianalumab).,	ianalumab	4. : New Delhi, date not specified.,	09/05/2023	: VAY736 = 150.0000 mg/1ml In House Specification Active.,	: Concentrate for solution for infusion.,	3 mg/kg and 9 mg/kg intravenously given every 4 weeks for 16 weeks	: Primary Immune Thrombocytopenia (ITP).,	(1) ICD-10 Condition: D694||Other primary thrombocytopenia,	" :", "- Nil Ratan Sircar Medical College and Hospital, 138, Acharya Jagadish Chandra Bose Road, Kolkata, West Bengal - 700014.\nEthics committee details: Institutional Ethics Committee, Office of Principal, Nil Ratan Sircar Medical College and Hospital, 138, Acharya Jagadish Chandra Bose Road, Kolkata, West Bengal – 700014. ECR/609/Inst/WB/2014/RR-20. Name of the investigator: Dr. Tuphan Kanti D…	Site 1 : IMS & SUM Hospital Department of Hematology,Kalinga Nagar, Ghatikia, Bhubaneswar, 751003 BhadrakORISSA. Name of principal investigator: Dr Priyanka Samal. Site 2 : Nil Ratan Sircar Medical College and Hospital Department of Hematology 138, Acharya Jagadish Chandra Bose Road, Kolkata, West Bengal- 700014KolkataWEST BENGAL. Name of principal investigator: Dr Tuphan Kanti Dolai. Site 3 : Po…
Sr. No. 53 CT-66-20- PPD.pdf .txt.csv	45488	CTRI/2020/08/027205 [Registered on: 18/08/2020] Trial Registered Prospectively	a randomized, double-blind, placebo-controlled, study evaluating the efficacy and safety of otilimab iv in patients with severe pulmonary covid-19 related disease.	a randomized, double-blind, placebo-controlled, study evaluating the efficacy and safety of otilimab iv in patients with severe pulmonary covid-19 related disease.	0.987879	Otilimab.	Otilimab in addition with Standard of care	4. Place: New Delhi, Date: not specified.	18/08/2020	Otilimab = 90.0000 milligram (mg) Manufacturer Specification Active.	Single use vial.	Fully human anti-GM-CSF monoclonal antibody (mAb),_x000D_ frequency : Once only on day 1,_x000D_ _x000D_ Route of administration : IV infusion,_x000D_ _x000D_ Duration of therapy : therapy will be administered approximately over 1 hour	Severe pulmonary COVID-19 related disease.	(1) ICD-10 Condition: B972||Coronavirus as the cause of diseases classified elsewhere,	Details of clinical trial sites: - Kasturba Hospital for Infectious Diseases, Sane Guruji Marg, Mumbai-400011, Ethics Committee: Jaslok Hospital and Research Centre, ECR/294/Inst/MH/2013/RR-19, Name of investigator: Dr. Jhaveri Ajay Bharat. - Max Smart Super Speciality Hospital, Saket (A Unit of Gujarmal Modi Hospital & Research Centre for Medical Sciences), Mandir Marg, Press Enclave Road Saket,…	Site 1 : Government Medical College and Hospital-Aurangabad Department of Medicine, Government Medical College and Hospital, Panchakki Road Aurangabad 431001, Maharashtra, India AurangabadMAHARASHTRA. Name of principal investigator: Dr Meenakshi Bhattacharya. Site 2 : Government Medical College and Hospital-Nagpur Department of Medicine, ward no 44, Government Medical College and Hospital, Medica…
Sr. No. 50 Ct-44-20-Pfizer.pdf .txt.csv	48022	CTRI/2020/10/028440 [Registered on: 16/10/2020] Trial Registered Prospectively	a phase 2, randomized, double-blind, double-dummy, placebo-controlled, dose-ranging, dose-finding, parallel group study to assess efficacy and safety of pf-06865571 (dgat2i) alone and when coadministered with pf-05221304 (acci) in adult participants with biopsy-confirmed nonalcoholic steatohepatitis and fibrosis stage 2 or 3.	a phase 2, randomized, double-blind, double-dummy, placebo-controlled, dose-ranging, dose-finding, parallel group study to assess efficacy and safety of pf-06865571 (dgat2i) alone and when coadministered with pf-05221304 (acci) in adult participants with biopsy-confirmed nonalcoholic steatohepatitis and fibrosis stage 2 or 3	0.987842	Names of the drugs are PF-06865571, Placebo for PF-06865571, PF-05221304, and Placebo for PF-05221304.	Drug: PF-05221304 _x000D_ Tablet	4. New Delhi, and the date is not specified in the prompt.	16/10/2020	: - PF-06865571 = 25.0000 milligram (mg) In House Specification Active - PF-06865571 = 50.0000 milligram (mg) In House Specification Active - PF-06865571 = 150.0000 milligram (mg) In House Specification Active - Placebo for PF-06865571 = 0.0000 milligram (mg) Not Applicable(NA)Active - PF-05221304 = 5.0000 milligram (mg) In House Specification Active - PF-05221304 = 10.0000 milligram (mg) In Hous…	Tablets.	(1)Experimental: PF-06865571 (150 mg BID) + PF-05221304 (5 mg BID) _x000D_ participants will receive medication for 48 weeks_x000D_ Interventions:Drug: PF-06865571_x000D_ Drug: PF-05221304_x000D_ _x000D_ (2)Experimental: PF-06865771 (300 mg BID) + PF-05221304 (10 mg BID) _x000D_ participants will receive medication for 48 weeks_x000D_ Interventions:◦Drug: PF-06865571_x000D_ Drug: PF-05221304	the treatment of Non-alcoholic Fatty Liver Disease and Non-alcoholic Steatohepatitis with Liver Fibrosis.	(1) ICD-10 Condition: K760||Fatty (change of) liver, not elsewhere classified,	are : 1. Gujarat Hospital – Gastro and Vascular Centre, Opposite Shree Ram Petrol Pump, Anand Mahal Road, Adajan, Surat, Gujarat-395009, India; Ethics committee details: Unity Hospital Ethics Committee, Unity Trauma Center and ICU, N-4 Janki Park Society Aai Mata Road, Paravat Patiya, Surat, Gujarat - 395010, Gujarat; ECR/6/Inst/GJ/2019; Name of investigator: Dr. Saumin P Shah. 2. Global Hospital…	Site 1 : Global Hospital – Super Specialty & Transplant Centre 35, Dr. E. Borges Road, Hospital Avenue, Opp. Dr Shirodkar High School, Parel, Mumbai, Maharashtra – 400012, IndiaMumbaiMAHARASHTRA. Name of principal investigator: Dr Samir Ramnik Shah. Site 2 : Gujarat Hospital – Gastro and Vascular Centre Opposite Shree Ram Petrol Pump, Anand Mahal Road, Adajan, Surat, Gujarat – 395009, India.Surat…
34 CT-3-21-AstraZeneca.pdf .txt.csv	55321	CTRI/2021/06/034430 [Registered on: 28/06/2021] Trial Registered Prospectively	a multicentre, randomised, double-blind, parallel-group, placebo-controlled, 52-week, phase iii study with an open-label extension to evaluate the efficacy and safety of benralizumab in patients with non-cystic fibrosis bronchiectasis (mahale).	a multicentre, randomised, double-blind, parallel-group, placebo-controlled, 52-week, phase iii study with an open-label extension to evaluate the efficacy and safety of benralizumab in patients with non-cystic fibrosis bronchiectasis (mahale)	0.987805	Benralizumab.	Benralizumab	4. The place of the document is New Delhi and the date is not specified in the prompt.	28/06/2021	Benralizumab =30.0000 mg/ml In House Specification Active.	PFS Solution for injection.	Benralizumab, subcutaneous injection, every 4 weeks for 52 weeks	Treatment of Patients with Non-Cystic Fibrosis Bronchiectasis.	(1) ICD-10 Condition: J479||Bronchiectasis, uncomplicated,	1. Institute of Respiratory Diseases, SMS Medial College & Hospital, B-2, Subhash Nagar shopping center, Shastri nagar, Jaipur, 302016, Rajasthan, India. Ethics committee details: Ethics Committee of SMS Medical College & Attached Hospital, First Floor. Dhanvantri OPD Block, SMS Hospital, J.L.N. Marg, Jaipur. 302004. Rajasthan, India. Name of investigator: Dr. Narendra Khippal. 2. Department of P…	Site 1 : Criticare Hospital and Research Institute 4th Floor, Dhanashree Complex, Near Hotel Hardeo, Sitabuldi, PIN- 440012NagpurMAHARASHTRA. Name of principal investigator: Dr Vivek Gupta. Site 2 : Hindustan Hospital Consultant Pulmonologist 522 3, 523 3 Nava India Road, Udaiyampalayam, Coimbatore - 641028 CoimbatoreTAMIL NADU. Name of principal investigator: Dr Srikanth Krishnamurthy. Site 3 : …
Sr. No. 15 CT-95-19-Eli Lilly.pdf .txt.csv	41957	CTRI/2020/04/024493 [Registered on: 07/04/2020] Trial Registered Prospectively	a multicenter, randomized, open-label, phase 3 trial comparing selpercatinib to physicians choice of cabozantinib or vandetanib in patients with progressive, advanced, kinase inhibitor naïve, ret-mutant medullary thyroid cancer (libretto-531).	a multicenter, randomized, open-label, phase 3 trial comparing selpercatinib to physicians choice of cabozantinib or vandetanib in patients with progressive, advanced, kinase inhibitor naïve, ret-mutant medullary thyroid cancer (libretto-531)	0.987755	LY3527723 (LOXO-292).	Selpercatinib	4. The place of the document is New Delhi and the date is not mentioned.	07/04/2020	: - Active ingredient: LOXO 292 = 40.0000 milligram (mg) In House Specification. - Inactive ingredients: Silicon dioxide = 1.3000 milligram (mg) U.S.P., Microcrystalline cellulose = 91.7000 milligram (mg) U.S.P.	capsules.	Selpercatinib given orally Estimated at up to 30 Months from 12years and older.	Medullary Thyroid Cancer.	(1) ICD-10 Condition: E079||Disorder of thyroid, unspecified,	: - Deenanath Mangeshkar Hospitals and Research Centre, Department of Medical Oncology, Erandwane, Pune – 411004, Maharashtra, India. Ethics committee details: Institutional Ethics Committee - Lata Mangeshkar Medical Foundation's (lEC - LMMF), Deenanath Mangeshkar Hospitals and Research Centre, Erandwane, Pune - 411004, Maharashtra India. ECR/15/Inst/Maha/2013/RR-19. Name of the investigator: Dr.…	Site 1 : Apollo Gleneagles Hospitals 58, Canal Circular Road, Opposite Salt Lake Stadium, Phool Bagan, Kolkata, West Bengal 700054KolkataWEST BENGAL. Name of principal investigator: Dr Prabrajya Narayan Mohapatra. Site 2 : Deenanath Mangeshkar Hospitals and Research Centre Erandawane, Pune – 411004, Maharashtra IndiaPuneMAHARASHTRA. Name of principal investigator: Dr Chetan Deshmukh. Site 3 : Gra…
14 CT-95-19-Eli Lilly.pdf .txt.csv	41957	CTRI/2020/04/024493 [Registered on: 07/04/2020] Trial Registered Prospectively	a multicenter, randomized, open-label, phase 3 trial comparing selpercatinib to physicians choice of cabozantinib or vandetanib in patients with progressive, advanced, kinase inhibitor naïve, ret-mutant medullary thyroid cancer (libretto-531).	a multicenter, randomized, open-label, phase 3 trial comparing selpercatinib to physicians choice of cabozantinib or vandetanib in patients with progressive, advanced, kinase inhibitor naïve, ret-mutant medullary thyroid cancer (libretto-531)	0.987755	LY3527723 (LOXO-292).	Selpercatinib	4. New Delhi, and the date is not mentioned.	07/04/2020	: - Active ingredient: LOXO 292 = 40.0000 milligram (mg) In House Specification Active - Inactive ingredients: Silicon dioxide = 1.3000 milligram (mg) U.S.P., Microcrystalline cellulose = 91.7000 milligram (mg) U.S.P. Inactive, Silicon dioxide = 2.7000 milligram (mg) U.S.P. inactive, Microcrystalline cellulose = 184.3000 milligram (mg) U.S.P. Inactive.	capsules.	Selpercatinib given orally Estimated at up to 30 Months from 12years and older.	Medullary Thyroid Cancer.	(1) ICD-10 Condition: E079||Disorder of thyroid, unspecified,	are : - Deenanath Mangeshkar Hospitals and Research Centre, Department of Medical Oncology, Erandwane, Pune – 411004, Maharashtra, India. Ethics committee details: Institutional Ethics Committee - Lata Mangeshkar Medical Foundation's (lEC - LMMF), Deenanath Mangeshkar Hospitals and Research Centre, Erandwane, Pune - 411004, Maharashtra India. ECR/15/Inst/Maha/2013/RR-19. Name of the investigator:…	Site 1 : Apollo Gleneagles Hospitals 58, Canal Circular Road, Opposite Salt Lake Stadium, Phool Bagan, Kolkata, West Bengal 700054KolkataWEST BENGAL. Name of principal investigator: Dr Prabrajya Narayan Mohapatra. Site 2 : Deenanath Mangeshkar Hospitals and Research Centre Erandawane, Pune – 411004, Maharashtra IndiaPuneMAHARASHTRA. Name of principal investigator: Dr Chetan Deshmukh. Site 3 : Gra…
18_Premium Serum.pdf .txt.csv	55706	CTRI/2021/06/034359 [Registered on: 24/06/2021] Trial Registered Prospectively	a phase i, randomized, controlled, open label study to assess the safety and efficacy of covid-19 antiserum in adult patients with sars-cov-2/covid-19 disease.	a phase i, randomized, controlled, open label study to assess the safety and efficacy of covid-19 antiserum in adult patients with sars-cov-2/covid-19 disease.	0.987578	Anti-COVID19 Serum [Equine Anti Covid Antibody Fragments (F(ab')2)].	Equine COVID-19 Antiserum [F(ab)2] Along with Standard of care.	4. of the document are New Delhi and 09-JUN-2021, respectively.	24/06/2021	COVID-19 Antiserum Immunoglobulin fragment F(ab')2 (NLT 100000 PRNT50), Glycine IP/BP (1.88%), Sodium Chloride (0.9%), and Water for Injection (q.s.).	Intravenous infusion.	The Dose of the IP is 1ml diluted in 100ml NS will be administered as an IV infusion. Total 3 doses with an interval of 24 hours between two doses, along with standard of care for treatment of COVID-19 positive patients.	for the treatment of SARS-CoV-2 infection/COVID19 disease.	(1) ICD-10 Condition: B972||Coronavirus as the cause of diseases classified elsewhere,	: - Site 1: Prakash Institute of Medical Sciences & Research, Urun-Islampur, Islampur-Sangli Road, Islampur, Tal-Walwa, Dist. Sangali-415409, Maharashtra. Ethics Committee details: Prakash Medical College Institutional Ethics Committee, Prakash Institute of Medical Sciences & Research, Urun-Islampur, Islampur-Sangli Road, Dist. Sangali-415409 Maharashtra, India. ECR No.: ECR/1052/Inst/MH/2018. Pr…	Site 1 : Prakash Institute of Medical Sciences & Research, Urun Islampur Clinical Research Department, Room No. 4, Islampur-Sangali, Islampur, Tal- Walwa, Dist- SangaliSangliMAHARASHTRA. Name of principal investigator: Dr Vijaykumar Patil. Site 2 : Rajarshee Chhatrapati Shahu Maharaj Govt. Medical College & CPR Hospital, Kolhapur Department of Medicine, CPR Hospital, Dasara Chowk, Bhausingji road…
Sr. No. 72 Ct-48-22-Ms. Novartis.pdf .txt.csv	66415	CTRI/2022/12/048602 [Registered on: 30/12/2022] Trial Registered Prospectively	\an adaptive, randomized, double-blind, dose exploration, parallel group, placebo-controlled, multicenter phase 2 trial to evaluate the efficacy, safety and tolerability of lnp023 in combination with standard-of-care with and without oral corticosteroids in adult patients with active lupus nephritis class iii-iv, +/- v\. ,	an adaptive, randomized, double-blind, dose exploration, parallel group, placebo controlled, multicenter phase 2 trial to evaluate the efficacy, safety and tolerability of lnp023 in combination with standard-of-care with and without oral corticosteroids in adult patients with active lupus nephritis class iii-iv, +/- v	0.987578	The name of the drug is LNP023 (Iptacopan). ,	Iptacopan- 50 mg along with MMF/MPS (Mycophenolate mofetil/Mycophenolate sodium) and corticosteroid Iptacopan (50mg) [ started on the basis of Iptacopan 200mg data]	of the document are New Delhi and the date is not specified in the prompt. ,	30/12/2022	is LNP023 = 200.0000 milligram (mg) In House Specification Active and LNP023 = 50.0000 milligram (mg) In House Specification Active. ,	a hard capsule. ,	Part 2- Iptacopan 50 mg b.i.d + placebo matching iptacopan 200 mg b.i.d + corticosteroid taper + MMF/MPS Treatment period- 52 weeks	adult patients with active lupus nephritis Class III-IV, +/- V. ,	(1) ICD-10 Condition: M321||Systemic lupus erythematosus withorgan or system involvement,	provided in an annexure and include the names and addresses of the sites, ethics committee details, ECR numbers beginning with 'ECR', and names of the investigators.")	Site 1 : All India Institute of Medical Science Department of Nephrology, AIIMS, Ansari Nagar, Delhi-29New DelhiDELHI. Name of principal investigator: DrArun Kumar. Site 2 : Christian Medical College and Hospital Department of Nephrology Christian Medical College and Hospital, Dr.Ida Scudder Road ,Christian Medical College,Vellore- 632004, Tamil Nadu, India.VelloreTAMIL NADU. Name of principal in…
Sr. No. 37-Ct-04-20-Novo Nordisk.pdf .txt.csv	41125	CTRI/2020/08/027258 [Registered on: 20/08/2020] Trial Registered Prospectively	a dose-finding trial evaluating the effect and safety of once-weekly treatment of somapacitan compared to daily norditropin® in children with short stature born small for gestational age with no catch-up growth by 2 years of age or older.	a dose-finding trial evaluating the effect and safety of once-weekly treatment of somapacitan compared to daily norditropin® in children with short stature born small for gestational age with no catch-up growth by 2 years of age or older	0.9875	Somapacitan.	somapacitan	4. Place: New Delhi, Date: Not mentioned.	20/08/2020	- Active ingredient: Somapacitan = 3.3000 mg/ml. - Inactive ingredients: Water for Injection = 1.0000 Volume U.S.P.,E.P., J.P., Sodium Hydroxide = 1.0000 q.s. U.S.P.,E.P.,J.P., Hydrogen Chloride =1.0000 q.s. U.S.P.,E.P.,J.P., Phenol = 4.0000 milligram mg/ml U.S.P.,E.P.,J.P., Polaxamer 188 = 1.0000 mg/ml U.S.P.,E.P.,J.P., Mannitol = 44.0000 mg/ml U.S.P.,E.P.,J.P., L-Histidine = 0.6800 mg/ml U.S.P.…	Dosage form: Injection.	Somapacitan injected under the skin once a week for a total of 52 weeks	Indications: Short Stature SGA.	(1) ICD-10 Condition: E20-E35||Disorders of other endocrine glands,	Details of clinical trial sites: - All India Institute of Medical Sciences, Ansari Nagar, New Delhi- 110029. Ethics committee details: Institute Ethics Committee, All India Institute of Medical Sciences, Room No 102, 1st Floor, Old O.T Block, Ansari Nagar, New Delhi, 110029. ECR number: ECR/538/Inst/DL/ 20I4/RR-17. Name of Investigator: Dr. Rajesh Khadgawat. - Jehangir Clinical Development Centre…	Site 1 : All India Institute of Medical Sciences Room No 303, Dept of Endocrinology & Metabolism, Biotechnology Block, Ansari Nagar, New Delhi- 110029, IndiaNew DelhiDELHI. Name of principal investigator: Dr Rajesh Khadgawat. Site 2 : Amrita Institute of Medical Sciences & Research Centre, Dept of Endocrinology and Diabetes, AIMS, Ponekkara. P.O,Kochi, Kerala-682041 KozhikodeKERALA. Name of princ…
76.pdf .txt.csv	68549	CTRI/2023/05/052831 [Registered on: 18/05/2023] Trial Registered Prospectively	\a phase iv, open label, single-arm, multi-centre clinical study to evaluate the safety and efficacy of denosumab in patients with postmenopausal osteoporosis.\,	a phase iv, open label, single-arm, multi-centre clinical study to evaluate the safety and efficacy of denosumab in patients with postmenopausal osteoporosis.	0.9875	Denosumab Injection 60 mg in 1mL.,	Denosumab 60 mg Injection	4. New Delhi, 25-Mar-2022.,	18/05/2023	Denosumab (active ingredient) 60mg, Sorbitol JP, Ph.Eur, BP, NF, IP 47.0mg (4.7%), Glacial acetic acid Ph.Eur, BP, JP, USP, IP 1.0mg(17 mM), Polysorbate 20 B.P, EP, JP, NF,IP 0.1 mg(0.01%), Sodium hydroxide IP, USP, BP, EP, JP, NF q.s. to adjust pH to 5.2, and Water for Injection IP, USP q.s to 1ml.,	a single-use pre-filled syringe for subcutaneous injection.,	Denosumab (Enzene Biosciences Ltd) 60 mg subcutaneously once only	postmenopausal osteoporosis.,	(1) ICD-10 Condition: M810||Age-related osteoporosis without current pathological fracture,	" :", "- Medical College and hospital, MCH building, 4th Floor, 88 College street, Kolkata-700073, West Bengal. Ethics Committee Details: Institutional Ethics committee for Human Research, Medical College and hospital, 88 College street, Kolkata -700073. ECR number: ECR/287Inst/WB/2013/RR-19. Principal Investigator: Dr. Kaushik Basu.", "- Sancheti Institute for orthopaedics and Rehabilitation, 16…	Site 1 : Ishwar Institute of Health Care Ishwar Heights , 1st Floor , Plot no 7 , Gut no 6/1, beside Punjabi Bhavan , Padegaon , Aurangabad - 431002, Maharashtra , India AurangabadMAHARASHTRA. Name of principal investigator: Dr Pravin Markade. Site 2 : Lifepoint Hospital 145/1 , Mumbai Bangalore Highway , Near Hotel Sayaji , Wakad , Pune -411057 Maharashtra , India PuneMAHARASHTRA. Name of princi…
Sr. No. 22 Ct-155-21-Parexel.pdf .txt.csv	66253	CTRI/2022/02/040586 [Registered on: 24/02/2022] Trial Registered Prospectively	\the tristards trial -thrombolysis therapy for ards a phase iib/iii operationally seamless, open-label, randomised, sequential, parallel-group adaptive study to evaluate the efficacy and safety of daily intravenous alteplase treatment given up to 5 days on top of standard of care(soc) compared with soc alone, in patients with acute respiratory distress syndrome (ards) triggered by covid-19.\,	the tristards trial - thrombolysis therapy for ards a phase iib/iii operationally seamless, open-label, randomised, sequential, parallel-group adaptive study to evaluate the efficacy and safety of daily intravenous alteplase treatment given up to 5 days on top of standard of care (soc) compared with soc alone, in patients with acute respiratory distress syndrome (ards) triggered by covid-19	0.98731	The name of the drug is Alteplase (recombinant tissue-type plasminogen activator, rt-PA). ,	Alteplase plus SOC	New Delhi and the date is not mentioned in the prompt. ,	24/02/2022	is Alteplase = 50.0000 milligram (mg) In House Specification Active. ,	Powder and Solvent for Solution for Injection. ,	Initial i.v. infusion of alteplase 0.6 mg per kg over 2 hours (Day 1) immediately followed by daily i.v. infusion of 0.04 mg per kg per hour over 12 hours (starting on Day 1 and up to Day 5 at maximum)	Acute respiratory distress syndrome (ARDS) triggered by COVID-19. ,	(1) ICD-10 Condition: B972||Coronavirus as the cause of diseases classified elsewhere,	provided in the Annexure. The names and addresses of the clinical trial sites, ethics committee details, ECR number beginning with 'ECR', and name of the investigator are as follows: ", "1. Victoria Hospital, Bangalore Medical College and Research Institute, K. R. Road, Fort, Bangalore-560002, India, Ethics Committee of Bangalore Medical College and Research Institute, K. R. Road, Fort, Bangalore…	Site 1 : Aster Prime Hospitals Floor No 2, Department of Pulmonology Plot No: 2&4, Opp. Passport Seva Kendra, Mithrivanam, Ameeerpet, 500036HyderabadTELANGANA. Name of principal investigator: Dr Nagaraju B. Site 2 : Chopda Medicare & Research Centre Pvt. Ltd Department of Pulmonology, OPD No 2, Ground Floor, Magnum Heart Institute 3/5, Patil Lane No. 1, Laxmi Nagar, Near K.B.H. Vidyalaya, Canada …
59IQVIA.pdf .txt.csv	46964	CTRI/2020/10/028183 [Registered on: 01/10/2020] Trial Registered Prospectively	a phase iii, multicenter, randomized, parallel group, double blind, double dummy, active controlled study of evobrutinib compared with teriflunomide, in participants with relapsing multiple sclerosis to evaluate efficacy and safety.	a phase iii, multicenter, randomized, parallelgroup, double blind, double dummy, active controlled study of evobrutinib compared with teriflunomide, in participants with relapsing multiple sclerosis to evaluate efficacy and safety.	0.987179	Evobrutinib.	Evobrutinib (M2951) 45mg administered orally twice daily	4. The place of the document is New Delhi and the date is not mentioned in the prompt.	01/10/2020	Evobrutinib = 45.0000 milligram (mg) in-house specification active.	an immediate-release film-coated tablet.	Blinding will be accomplished using a double dummy design given the differences in tablet characteristics between Evobrutinib and Aubagio®. For the purpose of this study, Evobrutinib matching placebo tablets and Aubagio® matching placebo tablets have been developed. Placebo tablets have the same visual appearance as the active tablets.	for subjects with Relapsing Multiple Sclerosis.	(1) ICD-10 Condition: G35||Multiple sclerosis,	: - Sir Ganga Ram Hospital, Marg, Rajinder Nagar, New Delhi-110060, Ethics Committee details: Sir Ganga Ram Hospital Ethics Committee, Room No. 1496, 4th Floor, Old Building, Sir Ganga Ram Hospital, Rajinder Nagar, New Delhi -110060, ECR/20/Inst/DL/2013/RR-2019, Name of investigator: Dr. Anshu Rohtagi. - Max Super Specialty Hospital, 1, Press Enclave Road, Saket, New Delhi -110017, Ethics Committ…	Site 1 : Mallikatta Neuro Centre 3rd floor, Neurology department, Super Specialty building,Opp.MallikattaCircle Kadri Mangalore-575002 Karnataka IndiaBangalore RuralKARNATAKA. Name of principal investigator: Dr Shankara Nellikunja. Site 2 : Max Super Speciality Hospital Ground floor, Neurology department,Saket(West Block), 1 Press Enclave Road, Saket, New Delhi-110017, India. New DelhiDELHI. Name…
24 CT-138-20-Parexel.pdf .txt.csv	51400	CTRI/2021/03/032040 [Registered on: 16/03/2021] Trial Registered Prospectively	a prospective, multicenter, open-label, single-arm study to evaluate the efficacy and safety of human plasma-derived fibrinogen concentrate (fib grifols) in subjects with congenital afibrinogenaemia and severe hypofibrinogenemia requiring either on-demand treatment for acute bleeding or surgical prophylaxis.	a prospective, multicenter, open-label, single-arm study to evaluate the efficacy and safety of human plasma-derived fibrinogen concentrate (fib grifols) in subjects with congenital afibrinogenaemia and severe hypofibrinogenemia requiring either on demand treatment for acute bleeding or surgical prophylaxis	0.987138	FIB Grifols.	FIB Grifols	4. New Delhi, and the date is not specified.	16/03/2021	Intravenous Fibrinogen Grifols = 1.0000 gram (g) E.P. Active.	Powder and solvent for solution for infusion.	Dosing will be individually calculated for each subject based on the target plasma fibrinogen level according to the type of bleeding, measured actual plasma fibrinogen level before infusion, and body weight. The IP will be administered according to the nominal potency of the product.	Congenital fibrinogen deficiency.	(1) ICD-10 Condition: D682||Hereditary deficiency of other clotting factors,	: - Dept. of Medicine and Haematology, St. John's Medical College and Hospital, Sarjapur Road, Bangalore- 560034, Kamataka, India. Ethics committee details: Institutional Ethics Committee, Ground Floor, St. John's Medical College, Sarjapur Road, Bangalore-560034, Karnataka, India. ECR/238/Inst/KA/2013/RR-19. Name of the investigator: Dr. Ross Cecil Reuben. - Sahyadri Super Speciality Hospital, 30…	Site 1 : Nil Ratan Sircar Medical College & Hospital Department of Hematology, 4th floor, HOD chamber, 138, Acharya J. C. Bose Road, West Bengal IndiaKolkataWEST BENGAL. Name of principal investigator: Dr Tuphan Kanti Dolai. Site 2 : Nirmal Hospital Pvt Ltd Department of Pediatrics, OPD No.1, First floor, Ring Road, GujaratSuratGUJARAT. Name of principal investigator: Dr Nirmalkumar Ganeshmal Cho…
87 CT-84-20-AstraZeneca-CT NOC.pdf .txt.csv	51554	CTRI/2021/01/030611 [Registered on: 20/01/2021] Trial Registered Prospectively	a phase iii, randomized, multicenter, double-blind, placebo-controlled study of durvalumab for the treatment of stage ii-iii nsclc patients with minimal residual disease following surgery and curative intent therapy (mermaid-2).	a phase iii, randomized, multicenter, double-blind, placebo-controlled study of durvalumab for the treatment of stage ii-iii nsclc patients with minimal residual disease following surgery and curative intent therapy (mermaid-2)	0.986957	Durvalumab.	Durvalumab	4. The place of the document is New Delhi and the date is not specified.	20/01/2021	Durvalumab = 500.0000 mg/10mLvial In House Specification Active.	Concentrate for solution for infusion.	Durvalumab monotherapy by IV administration _x000D_ Q4W - for 26 cycles.	the treatment of Stage II-III NSCLC Patients with Minimal Residual Disease Following Surgery and Curative Intent Therapy.	(1) ICD-10 Condition: C349||Malignant neoplasm of unspecifiedpart of bronchus or lung,	: 1. Mazumdar Shaw Medical Center (A Unit of Narayana Hrudayalaya Limited), No. 258/A, Bommasandra Industrial Area, Hosur Road, Anekal Taluk, Bangalore-560099, India. Ethics committee details: Institutional Ethics Committee, (A Unit of Narayana Hrudayalaya Limited), No. 258/A, Bommasandra Industrial Area, Hosur Road, Anekal Taluk, Bangalore-560099, India. ECR number: ECR/360/Inst/KA/2013/RR-19. N…	Site 1 : ACI Cumballa Hill Hospital Dept. of Medical Oncology 93/95, Kemp’s Corner, August Kranti Maidan, Grant Road, Mumbai PIN 400036MumbaiMAHARASHTRA. Name of principal investigator: Dr Suhas Vilasrao Aagre. Site 2 : All India Institute of Medical Sciences, Delhi Dept. of Medical Oncology, Ansari Nagar, PIN - 110029 New DelhiDELHI. Name of principal investigator: Dr Sachin Khurana. Site 3 : Fo…
Sr. No. 7 CT-56-22-Ms. Parexel.pdf .txt.csv	74304	CTRI/2023/02/049538 [Registered on: 08/02/2023] Trial Registered Prospectively	\a phase 2b, randomised, double-blind, active-controlled, multi-centre study to evaluate the efficacy, safety and tolerability of oral azd9977 and dapagliflozin treatment in patients with heart failure and chronic kidney disease\.,	a phase 2b, randomised, double-blind, active-controlled, multi-centre study to evaluate the efficacy, safety and tolerability of oral azd9977 and dapagliflozin treatment in patients with heart failure and chronic kidney disease	0.986957	AZD99and Dapagliflozin.,	Drug Product	of the document are New Delhi and the date is not mentioned.,	08/02/2023	is AZD9977 = 15.0000 milligram (mg) In House Specification Active, AZD9977 = 50.0000 milligram (mg) In House Specification Active, AZD9977 = 100.0000 milligram (mg) In House Specification Active, and Dapagliflozin = 10.0000 milligram(mg) In House Specification Active.,	Capsules and Tablets.,	Participants will be randomized to receive once daily oral 15 mg of AZD9977 and 10 mg Dapagliflozin for 12 weeks	Heart Failure and Chronic Kidney Disease.,	(1) ICD-10 Condition: N183||Chronic kidney disease, stage 3 (moderate), (2) ICD-10 Condition: N184||Chronic kidney disease, stage 4 (severe), (3) ICD-10 Condition: I501||Left ventricular failure, unspecified,	as follows:", "1. Dept. of Nephrology, Nizam’s Institute of Medical Sciences, Hyderabad-500082, Telangana, India. Ethics committee details: Nizam’s Institute Ethics Committee (NIEC), Nizam’s Institute of Medical Sciences, Hyderabad-500082, Telangana, India. ECR/303/Inst/AP/2013/RR-19. Name of the investigator: Dr. D. Sree Bhushan Raju.", "2. Max Super Speciality Hospital (East Block), (A Unit of …	Site 1 : Apollo Hospitals Department of Cardiology, Flat No 1/16 & 1/17, Second Floor, Krishna deep Chambers (Apollo Annexe), No.21, Greams Lane, Off Greams Road, Chennai 600 006 Tamil Nadu, India ChennaiTAMIL NADU. Name of principal investigator: Dr Abraham Oomman. Site 2 : Institute of PGME and Research and Seth Sukhlal Karnani Memorial Hospital Department of Nephrology, 244 Acharya J. C. Bose …
Sr. No. 82 CT-33-21-CBCC.pdf .txt.csv	63848	CTRI/2021/12/038848 [Registered on: 22/12/2021] Trial Registered Prospectively	\a phase 2, randomized, double-blind, placebo-controlled, two-arm study to evaluate the efficacy and safety of hydroxyprogesterone caproate intramuscular injection plus dexamethasone compared to dexamethasone alone in patients with moderate covid-19 disease (non-intubated, non-mechanical ventilation).\ ,	a phase 2, randomized, double blind, placebo-controlled, two-arm study to evaluate the efficacy and safety of hydroxyprogesterone caproate intramuscular injection plus dexamethasone compared to dexamethasone alone in patients with moderate covid-19 disease (non-intubated, nonmechanical ventilation).	0.986799	\Hydroxyprogesterone Caproate (HPC).\ ,	EG009A Manufactured by: Frontage Laboratories, Inc. USA	of the document are \New Delhi\ and the date is not specified in the prompt. ,	22/12/2021	\17-HPC API 25% w/v,\ \Benzyl benzoate Excipient 30.6% v/v,\ and \Castor oil Excipient 46% v/v.\ ,	\Intramuscular Injection.\ ,	Dose: 500 mg/2 mL,_x000D_ Frequency: Loading doses (Days 1-3) 500 mg/2mL BID & Maintenance doses (days 8, 12, 15, 19, 22, 26) EG009A 500 mg/2mL,_x000D_ Route of administration: IM,_x000D_ Duration of Therapy: 29 Days	\Pneumonia as one of the lung complications caused by SARS-CoV-2 infection.\ ,	(1) ICD-10 Condition: B972||Coronavirus as the cause of diseases classified elsewhere,	The details of the clinical trial sites include the names and addresses of the sites, the ethics committee details, ECR number beginning with 'ECR', and name of the investigator. However, this information is not provided in the prompt." )	Site 1 : Belagavi Institute of Medical Sciences Dr. B R Ambedkar Road, Belagavi -590001, Karnataka, India BelgaumKARNATAKA. Name of principal investigator: Dr Sandeep Dandin. Site 2 : BGS Global Institute of Medical Sciences and Hospital No: 67, BGS Health & Education City, Uttarahalli Main Road, Kengeri, Bangalore – 560060, Karnataka, IndiaBangaloreKARNATAKA. Name of principal investigator: Dr Y…
Sr. No. 35 CT-07-20-Pfizer.pdf .txt.csv	44827	CTRI/2020/07/026827 [Registered on: 27/07/2020] Trial Registered Prospectively	a phase 2b, multicenter, randomized, double-blind, placebo-controlled dose-ranging study to evaluate the efficacy, safety, and pharmacokinetics of pf-06480605 in adult participants with moderate to severe ulcerative colitis.	a phase 2b, multicenter, randomized, double-blind, placebo-controlled dose-ranging study to evaluate the efficacy, safety, and pharmacokinetics of pf-06480605 in adult participants with moderate to severe ulcerative colitis	0.986726	PF-06480605 Solution for Injection (2mL/vial) or Placebo for Solution for Injection (2 mL/vial).	PF 06480605	4. New Delhi, and the date is not specified in the prompt.	27/07/2020	Water for injection, Sucrose, Polysorbate 80, L-Histidine hydrochloride monohydrate, L-Histidine, and PF-06480605. PF-06480605 is the active ingredient, and the rest are inactive ingredients.	Solution for injection.	Doses of 50 mg, 150 mg, and 450 mg PF-06480605 or Placebo will be administered through 4 treatment arms in a 12-week induction phase. After the induction phase, doses of 50 mg, 150 mg, and 450 mg PF-06480605 will be administered through 3 treatment arms in a 40-week chronic therapy phase	for the induction and maintenance of remission of inflammatory bowel disease (IBD) in patients.	(1) ICD-10 Condition: K515||Left sided colitis, (2) ICD-10 Condition: K510||Ulcerative (chronic) pancolitis, (3) ICD-10 Condition: K512||Ulcerative (chronic) proctitis, (4) ICD-10 Condition: K513||Ulcerative (chronic) rectosigmoiditis,	1. Surat Institute of Digestive Sciences, Vijay Nagar Gate No-3, Besides Nirman Bhavan, Opposite Gandhi College, 395002, Surat, Gujarat, India. Ethics committee details: Surat Institute of digestive sciences EC, Surat Institute of digestive sciences, A unit of SIDS healthcare Pvt. Ltd, J J Empire Vijay Nager-3, Beside Nirmal Bhavan, Majura Gate Surat, Surat Gujarat - 395002 India. ECR/813/lnst/GJ…	Site 1 : All India Institute of Medical Sciences Ansari Nagar, New Delhi-110029, IndiaNew DelhiDELHI. Name of principal investigator: Dr Saurabh Kedia. Site 2 : Gujarat Hospital – Gastro and Vascular Centre Opposite Shree Ram Petrol Pump, Anand Mahal Road, Adajan, Surat, Gujarat, Pin-395009, IndiaSuratGUJARAT. Name of principal investigator: Dr Saumin Shah. Site 3 : Kasturba Medical College and H…
Sr. No. 48 CT-162-21-Pfizer.pdf .txt.csv	64719	CTRI/2022/04/042263 [Registered on: 28/04/2022] Trial Registered Prospectively	phase 1/2 study to evaluate palbociclib (ibrance®) in combination with irinotecan and temozolomide and/or in combination with topotecan and cyclophosphamide in pediatric patients with recurrent or refractory solid tumors.	phase 1/2 study to evaluate palbociclib (ibrance®) in combination with irinotecan and temozolomide and/or in combination with topotecan and cyclophosphamide in pediatric patients with recurrent or refractory solid tumors	0.986547	PD-332991 (Palbociclib).	Experimental: Phase 2 Arm A_x000D_ _x000D_ Palbociclib in combination with irinotecan and temozolomide.	4. New Delhi and the date is not mentioned in the prompt.	28/04/2022	PD-332991 (Palbociclib) in different strengths - 75.0000 milligram (mg), 100.0000 milligram (mg), 125.0000 milligram (mg), and 25.0000 mg/ml. The prompt does not mention any inactive ingredients.	Capsules and Oral Solutions.	Drug: Palbociclib_x000D_ Administered (oral) at 75 mg/m2 on days 1-14 of a 21-day cycle_x000D_ _x000D_ Drug: Temozolomide_x000D_ Administered at 100 mg/m2 (oral or intravenous), on days 1-5 of a 21-day cycle_x000D_ _x000D_ Drug: Irinotecan_x000D_ Administered at 50 mg/m2 (intravenous), on days 1-5 of a 21-day cycle	the treatment of Ewing sarcoma.	(1) ICD-10 Condition: C419||Malignant neoplasm of bone and articular cartilage, unspecified,	mentioned in the Annexure of the document. The names and addresses of the clinical trial sites are Artemis Hospital, Sector 51, Gurugram-001, Haryana, India; Dr. B. R. Ambedkar Institute Rotary Cancer Hospital, All India Institute of Medical Sciences, Ansari Nagar, New Delhi, Delhi-110029, India; Rajiv Gandhi Cancer Institute and Research Centre, Sir Chotu Ram Marg, Sector-5, Rohini, New Delhi-11…	Site 1 : Artemis Hospital Dept. of Medical Oncology, Sector 51, Gurgaon, Haryana- 122001GurgaonHARYANA. Name of principal investigator: Dr Vineet Govinda Gupta. Site 2 : Dr B. R Ambedkar Institute Rotary Cancer Hospital Room No. 216, 2nd floor, Dr. B.R.A Institute - Rotary Cancer Hospital ;All India Institute of Medical Sciences, Ansari Nagar, New Delhi -110029. New DelhiDELHI. Name of principal …
Sr. No. 50 CT-162-21-Pfizer.pdf .txt.csv	64719	CTRI/2022/04/042263 [Registered on: 28/04/2022] Trial Registered Prospectively	phase 1/2 study to evaluate palbociclib (ibrance®) in combination with irinotecan and temozolomide and/or in combination with topotecan and cyclophosphamide in pediatric patients with recurrent or refractory solid tumors.	phase 1/2 study to evaluate palbociclib (ibrance®) in combination with irinotecan and temozolomide and/or in combination with topotecan and cyclophosphamide in pediatric patients with recurrent or refractory solid tumors	0.986547	PD-332991 (Palbociclib).	Experimental: Phase 2 Arm A_x000D_ _x000D_ Palbociclib in combination with irinotecan and temozolomide.	4. New Delhi and the date is not mentioned in the prompt.	28/04/2022	PD-332991 (Palbociclib) in different strengths - 75.0000 milligram (mg), 100.0000 milligram (mg), 125.0000 milligram (mg), and 25.0000 mg/ml.	Capsules and Oral Solutions.	Drug: Palbociclib_x000D_ Administered (oral) at 75 mg/m2 on days 1-14 of a 21-day cycle_x000D_ _x000D_ Drug: Temozolomide_x000D_ Administered at 100 mg/m2 (oral or intravenous), on days 1-5 of a 21-day cycle_x000D_ _x000D_ Drug: Irinotecan_x000D_ Administered at 50 mg/m2 (intravenous), on days 1-5 of a 21-day cycle	the treatment of Ewing sarcoma.	(1) ICD-10 Condition: C419||Malignant neoplasm of bone and articular cartilage, unspecified,	mentioned in the Annexure of the document. The names and addresses of the clinical trial sites are Artemis Hospital, Sector 51, Gurugram-001, Haryana, India; Dr. B. R. Ambedkar Institute Rotary Cancer Hospital, All India Institute of Medical Sciences, Ansari Nagar, New Delhi, Delhi-110029, India; Rajiv Gandhi Cancer Institute and Research Centre, Sir Chotu Ram Marg, Sector-5, Rohini, New Delhi-11…	Site 1 : Artemis Hospital Dept. of Medical Oncology, Sector 51, Gurgaon, Haryana- 122001GurgaonHARYANA. Name of principal investigator: Dr Vineet Govinda Gupta. Site 2 : Dr B. R Ambedkar Institute Rotary Cancer Hospital Room No. 216, 2nd floor, Dr. B.R.A Institute - Rotary Cancer Hospital ;All India Institute of Medical Sciences, Ansari Nagar, New Delhi -110029. New DelhiDELHI. Name of principal …
Sr. No. 123 Ct-110-21-Novartis.pdf .txt.csv	58577	CTRI/2021/12/038740 [Registered on: 20/12/2021] Trial Registered Prospectively	\a phase iii, multi-center, open-label, randomized study of oral asciminib versus investigator selected tki in patients with newly diagnosed philadelphia chromosome positive chronic myelogenous leukemia in chronic phase\ ,	a phase iii, multi-center, open-label, randomized study of oral asciminib versus investigator selected tki in patients with newly diagnosed philadelphia chromosome positive chronic myelogenous leukemia in chronic phase	0.986425	The name of the drug is ABL001 (Asciminib). ,	Asciminib (80 mg QD)	of the document are New Delhi and it is not mentioned in the prompt when the document was issued. ,	20/12/2021	is ABL001 = 40.0000 milligram (mg) In House Specification Active. It is not mentioned in the prompt if there are any inactive ingredients. ,	film-coated tablets. ,	Two 40 mg tablet QD (once daily) (total daily dose 80 mg)(oral intake)(treatment to be continued till end of study or until early discontinuation due to any reason; the End of study will occur 5years from LPFT)	newly diagnosed Philadelphia Chromosome Positive Chronic Myelogenous Leukemia in Chronic Phase. ,	(1) ICD-10 Condition: C921||Chronic myeloid leukemia, BCR/ABL-positive,	as follows: ", "1. Rajiv Gandhi Cancer Institute and Research Centre, Sector 5, Rohini, Delhi-110085, India. Ethics committee details: Institutional Review Board, Rajiv Gandhi Cancer Institute and Research Centre, Sector 5, Rohini, Delhi-110085, India. ECR number: ECR/10/Inst/DC/2013/RR-19. Name of the investigator: Dr. Dinesh Bhurani. ", "2. Tata Medical Center, 14/MAR (EW), Newtown, Rajarhat, K…	Site 1 : Rajiv Gandhi Cancer Institute and Research Centre DEPARTMENT OF HEMATO ONCOLOGY and BMT, Sector-5, Rohini, Delhi-110085, IndiaNorth WestDELHI. Name of principal investigator: Dr Narendra Agarwal. Site 2 : Tata Medical Centre Division of Hematology/Oncology and Haematopoietic Cell Transplantation, 14 MAR (EW) Newtown, Rajarhat Kol 700160KolkataWEST BENGAL. Name of principal investigator: …
4Ct-118-20-Bayer.pdf .txt.csv	51824	CTRI/2021/03/032172 [Registered on: 19/03/2021] Trial Registered Prospectively	a randomized, double-blind, placebo-controlled phase 3 study of darolutamide in addition to androgen deprivation therapy (adt) versus placebo plus adt in men with metastatic hormone-sensitive prostate cancer (mhspc).	a randomized, double-blind, placebo-controlled phase 3 study of darolutamide in addition to androgen deprivation therapy (adt) versus placebo plus adt in men with metastatic hormone-sensitive prostate cancer (mhspc)	0.986239	Darolutamide.	Type Name Details Intervention Darolutamide (BAY 1841788) Darolutamide 600 mg, oral, twice daily with food, at approximately 12 hour intervals as close to the same time each day as possible._x000D_ _x000D_ The study treatment will be administered until documented radiological disease progression assessed by central review, unacceptable toxicity or until any other withdrawal criteria specified in …	4. New Delhi, and the date is not specified.	19/03/2021	Darolutamide = 300.0000 milligram (mg) In House Specification Active.	tablets.	Type	metastatic hormone-sensitive prostate cancer.	(1) ICD-10 Condition: C61||Malignant neoplasm of prostate,	1. HCG Cancer Center, Sola Science City Road, Nr. Sola Bridge, S.G. Highway, Ahmedabad-380060, Gujarat, India, ECR/92/Inst/GJ/2013/RR-19, Dr. Ashish Kaushal 2. Christian Medical College and Hospital, Department of Medical Oncology, Ludhiana-141008, Punjab, India, Institutional Ethics Committee, Christian Medical College and Hospital, Brown Road, Ludhiana, Punjab-141008, ECR//Inst/PB/2013/RR-19, D…	Site 1 : All India Institute of Medical Sciences Room # 133, Dr. Bhimrao Ambedkar Institute of Rotary Cancer Hospital (Dr BRA IRCH), Ansari Nagar, New Delhi-110029, Delhi, IndiaNew DelhiDELHI. Name of principal investigator: Dr Haresh KP. Site 2 : All India Institute of Medical Sciences (AIIMS) Sijua, Patrapaday, Bhubaneswar-751019, Orissa, IndiaKhordhaORISSA. Name of principal investigator: Dr S…
Sr. No. 76 Ct-161-21-Ms. IQVIA.pdf .txt.csv	68434	CTRI/2022/09/045473 [Registered on: 13/09/2022] Terminated Trial Registered	\a phase ii open-label, non-randomized, multi-cohort, multicenter study in previously unvaccinated immunocompromised adults to determine the immunogenicity and safety of azd1222 vaccine for the prevention of covid-19\.\n4	a phase ii open-label, non-randomized, multi-cohort, multicenter study in previously unvaccinated immunocompromised adults to determine the immunogenicity and safety of azd1222 vaccine for the prevention of covid-19	0.986239	The name of the drug is AZD1222.\n8	AZD1222	\Place: New Delhi, Date: Not specified\.\n5	13/09/2022	is AZD1222 = 5.0000 mL (VP/mL) In House Specification Active. The prompt does not provide information on inactive ingredients.\n11	a vial solution for injection.\n10	Route: Intramuscular injection_x000D_ Dose: It is a sterile, clear to slightly opaque solution with a label-claim volume of 5 mL and can provide up to ten 0.5mL doses._x000D_ _x000D_ Each participant will receive 2 doses of AZD1222 with the first dose administered on Day 1 and second dose on Day 29 (for a 4-week dosing interval)	for the prevention of COVID-19.\n12	Vaccine for the Prevention of COVID-19	provided in Annexure of the document. The names and addresses of the clinical trial sites are: \n1. Sir Ganga Ram Hospital, Sir Ganga ram Hospital Marg, Rajinder Nagar, New Delhi-110060, India\n2. Shetty’s Hospital, Plot No. 11 & 12, 12th “F” Main, Kaveri Nagar, Bommanahalli, Kodichikkanahalli, Bangalore-560068, Karnataka, India\n3. Mavens’ Hospital, N 37, Oppo. Reliance Fresh, Vaishali Nagar, Aj…	Site 1 : BAPS Pramukh Swami Hospital Clinical Research Department, Shri Pramukh Swami Mahraj Marg, Adajan Char Rasta, Adajan-395009SuratGUJARAT. Name of principal investigator: Dr Parshottam G Koradia. Site 2 : D Y Patil Medical College 5TH Floor, Clinical Research Unit, D Y Patil Medical College Building, 5th Floor, Department of Pharmacology, Sector-5, Nerul, Navi Mumbai-400706ThaneMAHARASHTRA.…
Sr. No. 43 CT-23-20-AsraZeneca.pdf .txt.csv	45704	CTRI/2020/08/027208 [Registered on: 18/08/2020] Trial Registered Prospectively	a phase iii randomized, double-blind, placebo-controlled, multi-regional, international study of durvalumab in combination with gemcitabine plus cisplatin versus placebo in combination with gemcitabine plus cisplatin for patients with first-line advanced biliary tract cancers (topaz-1).	a phase iii randomized, double-blind, placebo-controlled, multi- regional, international study of durvalumab in combination with gemcitabine plus cisplatin versus placebo in combination with gemcitabine plus cisplatin for patients with first-line advanced biliary tract cancers (topaz-1)	0.986159	Durvalumab.	Durvalumab (MEDI4736)	4. New Delhi and the date is not mentioned in the prompt.	18/08/2020	Durvalumab = 500.0000 milligram (mg) In House Specification Active.	Injection.	Durvalumab plus Cisplatin and Gemcitabine _x000D_ _x000D_ Frequency: every 03 weeks for first 8 cycles followed by every 4 weeks till progression _x000D_ Root of Administration: IV (Intravenous) _x000D_ Duration of therapy: until progression	Patients with First-Line Advanced Billiary Tract Cancers.	(1) ICD-10 Condition: C221||Intrahepatic bile duct carcinoma, (2) ICD-10 Condition: C23||Malignant neoplasm of gallbladder,	are : - Department of Medical Oncology, Ground Floor, Indraprastha Apollo Hopsital Mathura Road, Sarita Vihar, New Delhi-110076, India; Institutional Ethics Committee, Clinical Studies Indraprastha, Apollo Hospitals, Delhi-Mathura Road, Sarita Vihar, New Delhi-110076; ECR/5/ Inst/DL/2013/RR-19; Dr. Manish Singhal - Action Cancer Hospital, A-4 Paschim Vihar, New Delhi-110063; Institutional Ethics …	Site 1 : Action Cancer Hospital Dept. of Medical Oncology Room no 824, A-4 block, A6 Block, Paschim Vihar, PIN- 110063 New DelhiDELHI. Name of principal investigator: Dr Sushant Mittal. Site 2 : Artemis Hospitals Dept. of Medical Oncology Sector-51, PIN-122001 GurgaonHARYANA. Name of principal investigator: Dr Vineet Govinda Gupta. Site 3 : Indraprastha Apollo Hospitals Sarita Vihar Dept. of Medi…
Permission 11.pdf .txt.csv	58873	CTRI/2021/12/038690 [Registered on: 16/12/2021] Trial Registered Prospectively	: “a prospective, open-label, multicentre, interventional, single-arm, phase iv study to evaluate the safety and efficacy of agalsidase alfa (r-dna origin) (replagal™) in indian children and adults with fabry disease”.\n4	a prospective, open-label, multicentre, interventional, single-arm, phase iv study to evaluate the safety and efficacy of agalsidase alfa (r-dna origin) (replagal™) in indian children and adults with fabry disease	0.986111	The name of the drug is Agalsidase alfa (r-DNA origin).\n8	Replagal	: New Delhi, 12-Apr-2023.\n5	16/12/2021	is: Each vial of 3.5 ml of concentrate contains 3.5 mg of agalsidase alfa, along with Sodium phosphate, monobasic, monohydrate, Polysorbate 20, Sodium chloride, Sodium hydroxide, and Water for Injection.\n11	Concentrate solution for intravenous (IV) infusion.\n10	Each single-use vial of Replagal contains 3.5 mg of agalsidase alfa in 3.5 mL of solution.	: Agalsidase alfa is indicated for long-term enzyme replacement therapy in patients with a confirmed diagnosis of Fabry Disease (α-galactosidase A deficiency).\n12	(1) ICD-10 Condition: E752||Other sphingolipidosis,	:", "- Sir Gangaram Hospital, Sarhadi Gandhi Marg, Old Rajinder Nagar, Rajinder Nagar, New Delhi, Delhi – 110060, India. Ethics Committee Details: Sir Ganga Ram Hospital Ethics Committee, Room Number 1496, 4 floor, Old Building Sir Ganga Ram Hospital, Hospital Marg, Old, Rajinder Nagar, New Delhi – 110060, India. ECR/20/Inst/DL/2013/RR-19. Name of Principal Investigator: Dr. Ratna Dua Puri.\n- AI…	Site 1 : AIIMS Department of Pediatrics, Sri Aurobindo Marg, Ansari Nagar, Ansari Nagar East, New Delhi, Delhi 110029New DelhiDELHI. Name of principal investigator: Dr Neerja Gupta. Site 2 : Institute of Child Health Department of Pediatrics, Park Circus, Ballygunge, Kolkata, West Bengal 700017KolkataWEST BENGAL. Name of principal investigator: Dr Monjori Mitra. Site 3 : JK Lone Hospital Departme…
74.pdf .txt.csv	63950	CTRI/2022/06/043430 [Registered on: 22/06/2022] Trial Registered Prospectively	: \a randomized, active-controlled, multicenter, open label, two arm study to assess safety, efficacy, pharmacodynamics, and pharmacokinetics with pegfilgrastim pfs of intas pharmaceutical limited compared with neupogen injection in paediatric patients under 6 years of age with rhabdomyosarcoma or wilms’ tumour on myelosuppressive chemotherapy (cmt) regimen\.,	a randomized, active-controlled, multicenter, open label, two arm study to assess safety, efficacy, pharmacodynamics, and pharmacokinetics with pegfilgrastim pfs of intas pharmaceutical limited compared with neupogen® injection in paediatric patients under 6 years of age with rhabdomyosarcoma or wilms’ tumour on myelosuppressive chemotherapy (cmt) regimen	0.986072	Pegfilgrastim (r-DNA origin) Injection. ,	Pegfilgrastim	4. : New Delhi, 09.03.2022.,	22/06/2022	:\n- Active ingredient: Pegfilgrastim drug substance (r-DNA Origin).\n- Inactive ingredients: Glacial Acetic Acid, Sorbitol, Polysorbate 20, Sodium Hydroxide, and Water for Injection.,	a solution for injection for s.c administration.,	Dose formulation:Pre-filled syringe for Injection_x000D_ Adminitration:Subcutaneous_x000D_ Level(s):1.5 mg per 0.15 mL, 2.5 mg per 0.25 mL and 4.0 mg per 0.4 mL_x000D_ Duration: Single SC dose of pegfilgrastim between 24-27 hours after completion each chemotherapy cycle. Dose should be calculated based on the weight of the child before administration of the study intervention.	: Paediatric Patients Under 6 years of Age with Rhabdomyosarcoma or Wilms’ Tumour on Myelosuppressive Chemotherapy (CmT) Regimen.,	(1) ICD-10 Condition: C499||Malignant neoplasm of connective and soft tissue, unspecified,	" :\n- Site 1: Mahatma Gandhi Cancer Hospital & research Institute, 1/7 MVP colony, Visakhapatnam-530017, Andhra Pradesh, India. Ethics Committee Details: Institutional Review Board Mahatma Gandhi Cancer Hospital Research Institute, 1/7 MVP Colony, Visakhapatnam, Andhra Pradesh - 530017, India. ECR number: ECR/529/Inst/AP/2014/RR-20. Name of Principal Investigator: Dr. Rakesh Reddy Boya.\n- Site …	Site 1 : Deenanath Mangeshkar Hospital Department of Clinical Research, Room No. NA, Deenanath Mangeshkar Hospital and Research centre, Erandwane, Pune-411004.PuneMAHARASHTRA. Name of principal investigator: Dr Shailesh Kanvinde. Site 2 : Department of Pediatrics, Sir Ganga Ram Hospital Department of Clinical Research, Room No. NA, Sir Ganga Ram Hospital, Sir Ganga Ram Hospital marg, Rajinder nag…
3CT-04-21-ICMR.pdf .txt.csv	51528	CTRI/2021/12/038622 [Registered on: 14/12/2021] Trial Registered Prospectively	an international multicenter, adaptive, randomized double-blind, placebo-controlled trial of the safety, tolerability and efficacy of anti-coronavirus hyperimmune intravenous immunoglobulin for the treatment of adult hospitalized patients at onset of clinical progression of covid-19.	an international multicenter, adaptive, randomized double-blind, placebo- controlled trial of the safety, tolerability and efficacy of anti-coronavirus hyperimmune intravenous immunoglobulin for the treatment of adult hospitalized patients at onset of clinical progression of covid-19	0.986014	Anti-COVID-19 Hyperimmune Globulin (Human) (Anti-COVID-19 hIVIG).	Anti SARS CoV-2 Hyperimmune Intravenous Immunoglobulin	4. New Delhi, and the date is not mentioned in the prompt.	14/12/2021	The composition of the new drug: - Active ingredient: Anti-COVID-19 Hyperimmune Globulin (Human) (Anti-COVID-19 hIVIG) >98.0000 % U.S.P. - Inactive ingredients: Triton X-<5.0000 ppm U.S.P., Tri-n-butyl phosphat <1.0000 ppm U.S.P., Polysorbate = 0.3200 mg/ml U.S.P., Proline = 250.0000 mm U.S.P.	Solution for infusion.	Anti-Coronavirus Hyperimmune IVIG contains polyvalent antibodies with neutralizing specificity for SARS-CoV-2. It has the potential to provide a standardized therapy to augment host immunity to SARS-CoV-2 and prevent disease progression in symptomatic patients. Hyperimmune IVIG differs from standard IVIG in its derivation from donors who have mounted an immune response to the infection of interes…	COVID-19.	, (1) ICD-10 Condition: B972||Coronavirus as the cause of diseases classified elsewhere,	: - Clinical trial site 1: PGIMER, Chandigarh - Postgraduate Institute of Medical Education and Research, Chandigarh, India-1600Ethics committee details: Institutional Ethics Committee, Postgraduate Institute of Medical Education and Research, Chandigarh, ECR/25/Inst/Ch/2013/RR-20 Name of the investigator: Dr. Nusrat Shafiq - Clinical trial site 2: AIIMS Jodhpur - All India Institute of Medical S…	Site 1 : All India Institute of Medical Science, Jodhpur Basni Industrial Area, MIA 2nd Phase, Basni, Jodhpur, Rajasthan 342005JodhpurRAJASTHAN. Name of principal investigator: Dr Deepak Kumar. Site 2 : Post Graduate Institute of Medical Education and Research, Chandigarh Madhya Marg, Sector 12, Chandigarh, 160012ChandigarhCHANDIGARH. Name of principal investigator: Dr Nusrat Shafiq
Sr. No. 8 CT-87-22-PSI CRO.pdf .txt.csv	70455	CTRI/2023/03/050181 [Registered on: 01/03/2023] Trial Registered Prospectively	a phase 2, multicenter, randomized, double-blind, placebo-controlled, parallel-group study to evaluate the clinical efficacy and safety of vtx002 in subjects with moderately to severely active ulcerative colitis.	a phase 2, multicenter, randomized, double-blind, placebo-controlled, parallel-group study to evaluate the clinical efficacy and safety of vtx002 in subjects with moderately to severely active ulcerative colitis	0.985981	VTX002.	VTX002- 30mg	4. New Delhi and the date is not mentioned in the prompt.	01/03/2023	VTX002 = 3.0000 milligram (mg) In House Specification Active, VTX002 = 7.0000 milligram (mg) In House Specification Active, VTX002 = 10.0000 milligram (mg) In House Specification Active, VTX002 = 20.0000 milligram (mg) In House Specification Active.	tablets.	VTX002 30 mg, once daily, for the first 13 weeks of double-blind treatment. Followed by 39 weeks long term extension phase.	the treatment of Moderate to Severe Ulcerative Colitis.	(1) ICD-10 Condition: K519||Ulcerative colitis, unspecified,	: - Shree Giriraj Multispecialty Hospital, 27-Navjyot Park Corner, 150 Feet Ring Road, Rajkot, Gujarat-360005, India. Ethics committee details: Shree Giriraj Hospital Research Ethics Committee, Shree Giriraj Multispecialty Hospital, 27-Navjyot Park Corner, Amin Marg Cross Road, Rajkot, Gujarat-360005, India. ECR/74/Inst/GJ/2013/RR-19. Name of the investigator: Dr. Chetan Mehta. - Department of Ga…	Site 1 : King Georges Medical University Department of Surgical Gastroenterology, Shatabdi phase 1 , Chowk, Lucknow Lucknow Uttar PradeshLucknowUTTAR PRADESH. Name of principal investigator: Dr Abhijit Chandra. Site 2 : S.R.Kalla Memorial Gastro General Hospital 78-79 Dhuleshwar Garden Behind HSBC Bank Sardar Patel Marg C-Scheme Jaipur Jaipur RajasthanJaipurRAJASTHAN. Name of principal investigat…
12_ BBIL 2-18.pdf .txt.csv	56105	CTRI/2021/05/033752 [Registered on: 24/05/2021] Trial Registered Prospectively	a phase ii/iii, open label, multicenter study to evaluate the safety, reactogenicity and immunogenicity of the whole-virion inactivated sars-cov-2 vaccine (covaxin®) in healthy volunteers ages ≤18 to ≥ 2 years.	a phase ii/iii, open label, multicenter study to evaluate the safety, reactogenicity and immunogenicity of the whole-virion inactivated sars-cov-2 vaccine (covaxin®) in healthy volunteers ages ≤18 to ≥ 2 years	0.985849	Whole Virion Inactivated Corona Virus Vaccine, [BBV152].	BBV152	4. of the document are Place: New Delhi, Date: 12/05/2021.	24/05/2021	: Active ingredient: Whole Virion, Inactivated Corona Virus antigenStrain: NIV-2020-770, 6 mcg Inactive ingredients: Aluminium Hydroxide gel equivalent to Al+++ 250 mcg, TLR 7/8 Agonist 15 mcg, 2-Phenoxyethanol (2PE) I.P. 2.5 mg, Phosphate Buffered Saline q.s. to 0.5 ml.	Liquid for intramuscular injection.	0.5 ml administered intramuscular at day 0 and day 28	For active immunization against Corona Virus Disease (SARS-COV-2) COVID-19 of Healthy Volunteers of age 2-18 years.	Healthy	: 1. Meditrina Institute of Medical Sciences, Nagpur, Ethics Committee details: Meditrina Institute Ethics Committee, ECR number: ECR/4/Inst/MH/2013, Name of Principal Investigator: Dr. Vasant M Khalatkar. 2. AIIMS, Patna, Bihar, Ethics Committee details: Institutional Ethics Committee, All India Institute of Medical Science Patna Bihar -801507, ECR number: ECR/4/Inst/BH/2013, Name of Principal I…	Site 1 : All India Institute of Medical Sciences Patna Room No 105 Type 4 Block 2 Department of Paediatrics Aurangabad Road Phulwari SharifPatnaBIHAR. Name of principal investigator: Dr Chnadramani SIngh. Site 2 : All India Institute of Medical Scienecs Delhi Department of center for community medicine Room no 29 Old OT block, AIIMS News DelhiNew DelhiDELHI. Name of principal investigator: Dr San…
19_IIL_Dengue.pdf .txt.csv	74584	CTRI/2022/10/046728 [Registered on: 21/10/2022] Trial Registered Prospectively	\a phase i single blind randomized placebo controlled study to evaluate the safety and immunogenicity of live attenuated tetravalent recombinant dengue vaccine of hbi in healthy adults of 18 to 50 years of age.\,	a phase i single blind randomized placebo controlled study to evaluate the safety and immunogenicity of live attenuated tetravalent recombinant dengue vaccine of hbi in healthy adults of 18 to 50 years of age	0.985782	\Live Attenuated Tetravalent Recombinant Dengue Vaccine.\,	Live Attenuated Tetravalent Recombinant Dengue Vaccine of HBI	4. \New Delhi\ and \09-SEP-2022.\,	21/10/2022	: Each dose of 0.5 ml reconstituted vaccine contains rDENV-1 ≥ 3 log10PFU, rDENV-2 ≥ 4 log10PFU, rDENV-3 ≥ 3 log10PFU, rDENV-4 ≥ 3 log10PFU, Human Albumin 25 mg, Maltose 22.5 mg, and MEM with Hanks’salts(HMEM) q.s. to 0.5 mL to be reconstituted with sterile water for injection.,	\Lyophilized powder for subcutaneous injection.\,	0.5 mL single dose administered by subcutaneous route.	\Prophylaxis against Dengue.\,	Prevention of Dengue infection.	" :", "- Bharati Vidyapeeth (Deemed to be University) Medical College & Hospital, Pune-Satara Road, Katraj-Dhankawadi, Pune-411043, Maharashtra. Ethics Committee details: Ethics Committee - Bharati Vidyapeeth Medical College & Hospital, Pune-Satara Road, Katraj-Dhankawadi, Pune-411043, Maharashtra. ECR number: ECR/313/Inst/MH/2013/RR-1. Name of Principal Investigator: Dr. Sonali Palkar.", "- JSS …	Site 1 : Bharati Vidyapeeth (Deemed to be University) Medical College & Hospital Department of Infectious Diseases, Bharati Vidyapeeth (Deemed to be University) Medical College & Hospital , Pune-Satara Road, Katraj-Dhankawadi, Pune-411043, Maharashtra, IndiaPuneMAHARASHTRA. Name of principal investigator: Dr Sonali Palkar. Site 2 : JSS Hospital Department of Geriatrics, JSS Hospital, M.G. Road, M…
10.JSS.pdf .txt.csv	57079	CTRI/2021/06/034334 [Registered on: 22/06/2021] Trial Registered Prospectively	a prospective, randomized, multicentric, comparative phase i/ phase ii clinical trial to evaluate the clinical safety, efficacy and tolerability of equine anti covid antibody fragments f(ab’)2 as an add on therapy to standard of care (soc) in comparison to soc alone in hospitalized adult subjects with covid-19 infection, with moderate severity”.	a prospective, randomized, multicentric, comparative phase i/ phase ii clinical trial to evaluate the clinical safety, efficacy and tolerability of equine anti covid antibody fragments f(ab’)2 as an add on therapy to standard of care (soc) in comparison to soc alone in hospitalized adult subjects with covid-19 infection, with moderate severity.	0.985673	Equine Anti Covid Antibody Fragments F(ab’)2.	Equine Anti Covid Antibody Fragments F(ab’)2 in addition to SOC	4. New Delhi, dated May 4, 2021.	22/06/2021	Equine COVID Antibody fragments F(ab’)2 (neutralizing antibodies NLT 10000), Sodium acetate 1.65 mg, Sodium chloride 9 mg, m-cresol 0.0015 mL, and Polysorbate-80 (Tween-80) 0.0005 mL.	Solution for Injection.	3ml vial will be supplied for each patient that need to be diluted in 100ml NS and will be given at rate of 1ml/min	for the treatment of COVID-19 infected patients with moderate severity.	(1) ICD-10 Condition: B972||Coronavirus as the cause of diseases classified elsewhere,	are : - St. George Hospital, PD Mello Road, CST-Mumbai 400001 Maharashtra, with Ethics Committee details of Institutional Ethics Committee, GGMC, MUMBAI Grant Govt Medical College JJ Road, JJ Hospital compound Mumbai Central Mumbai Mumbai City Maharashtra - 400008 India, and the name of the Principal Investigator being Dr. Darnule Rahul Ashok. - Medanta Medicity, Sector 38, Gurugram Haryana-001, …	Site 1 : Excel Hospital 1-5-56/29, Plot No. 29, Old Alwal, Near IG Statue, Beside Bharat Petroleum, Secunderabad, Telangana-500010, India.HyderabadTELANGANA. Name of principal investigator: Dr Govardhan Rao MV. Site 2 : Kkasturi Medicare Pvt. Ltd. Harshniketan Gaondevi Road, Behind Navrang Hotel, Bhayandar West, Dist-Thane, 401101, Maharashtra, IndiaThaneMAHARASHTRA. Name of principal investigato…
Sr. No. 49 CT-21-21-CBCC.pdf .txt.csv	56659	CTRI/2021/07/034694 [Registered on: 08/07/2021] Trial Registered Prospectively	a phase ii study to evaluate the safety and efficacy of oql011 on vegfr inhibitor-associated hand-foot skin reaction in cancer patients.	a phase ii study to evaluate the safety and efficacy of oql011 on vegfr inhibitor-associated hand-foot skin reaction in cancer patients.	0.985507	OQL011.	Part-I:_x000D_ _x000D_ Investigational Treatment: OQL011(Dose I) ointment _x000D_ _x000D_ Part II:_x000D_ Investigational Treatment: OQL011(Dose II and Dose III) ointment	4. New Delhi, and the date is not mentioned in the prompt.	08/07/2021	: - Active ingredient: Nitroglycerine (1.95%) - Inactive ingredients: Lactose Monohydrate (10.26 g), Purified Water (8.00 g), Lanolin (35.00 g), White Petrolatum (46.74 g).	an ointment.	Part-I_x000D_ _x000D_ Investigational Treatment: OQL011(Dose I) ointment (0.2% w/w) 30 g (equivalent active ingredient: 60 mg). _x000D_ _x000D_ Part II:_x000D_ Investigational Treatment: OQL011(Dose II and Dose III) ointment (0.5% w/w and 0.1% w/w) 30 g (equivalent active ingredient: 150 mg and 30 mg). _x000D_ _x000D_ Frequency: 3 times a day_x000D_ Route of administration: Topical &_x000D_ Durat…	Hand and foot skin reaction.	(1) ICD-10 Condition: L271||Localized skin eruption due to drugs and medicaments taken internally,	: - Clinical trial site 1: Mumbai Oncocare Centre, 2nd Floor, Majithia Apartments, God’s Gift Premises Co. Op. Society Ltd., Above Irla Nursing Home, S V Road, Vile Parle (W), Mumbai - 400 056, Maharashtra, India. Ethics committee details: Mumbai Oncocare Centre Institutional Ethics Committee, ECR/7/Inst/MH/2019. Name of investigator: Dr. Kshitij Joshi. - Clinical trial site 2: Aadhar Health Inst…	Site 1 : Aadhar Health Institute Near South Bypass Crossing, NH10-Tosham Rd Connection Rd, Hisar, Haryana - 125005, indiaHisarHARYANA. Name of principal investigator: Dr Lovenish Goyal. Site 2 : Mumbai Oncocare Centre 2nd Floor, Majithia Apartments, Gods Gift Premises Co. Op. Society Ltd., Above Irla Nursing Home, S V Road, Vile Parle (W), Mumbai 400 056 Maharashtra, India MumbaiMAHARASHTRA. Name…
100 CT-107-20-PPD.pdf .txt.csv	49646	CTRI/2021/01/030594 [Registered on: 19/01/2021] Trial Registered Prospectively	a randomized, double-blinded, placebo-controlled trial to investigate the efficacy, safety, and tolerability of efgartigimod ph20 sc in adult patients with pemphigus (vulgaris or foliaceus) (address).	a randomized, double-blinded, placebo-controlled trial to investigate the efficacy, safety, and tolerability of efgartigimod ph20 sc in adult patients with pemphigus (vulgaris or foliaceus) (address)	0.985149	ARGX-113 (Efgartigimod PH20 SC).	ARGX-113 (Efgartigimod PH20 SC)	4. Place: New Delhi, Date: not specified.	19/01/2021	ARGX-113 = 165.0000 mg/ml In House Specification Active.	Injection.	Route of administration: efgartigimod with rHuPH20 will be administered Subcutaneously each week _x000D_ Duration of therapy: 30 weeks of treatment period. _x000D_ Dose: Efgartigimod PH20 SC will be administered on day 1 and day 8 at a dose of 2000 mg, followed by weekly administrations of 1000 mg until complete remission on minimal therapy (CR on minimal therapy).	Adult Patients with Pemphigus (Vulgaris or Foliaceus).	(1) ICD-10 Condition: L102||Pemphigus foliaceous, (2) ICD-10 Condition: L100||Pemphigus vulgaris,	Details of clinical trial sites: - B J Medical College, Civil Hospital, Asarwa, Ahmedabad-380016, Institutional Ethics Committee, Civil Hospital and B J Medical College, Ahmedabad, ECR/72/Inst/GJ/2013/RR-19, Dr. Bela J Shah. - Department of Dermatology, Venereology & Leprology, Postgraduate Institute of Medical Education & Research, Sector - Chandigarh - 1600 India, Institutional Ethics Committee…	Site 1 : Ajanta Hospital and IVF Centre Ajanta Research Centre, Ajanta Hospital and IVF Centre, 765, ABC Complex, Kanpur Road, Alambagh, Lucknow-226005 LucknowUTTAR PRADESH. Name of principal investigator: Dr Amit Madan. Site 2 : BJ Medical college and Civil Hospital Department of Dermatology, Venereology and Leprosy B. J. Medical College and Civil Hospital, Asarwa, Ahmedabad-380016 AhmadabadGUJA…
Sr. No. 84 CT-67-21-Novartis.pdf .txt.csv	51673	CTRI/2021/12/038694 [Registered on: 16/12/2021] Trial Registered Prospectively	\an open-label, multi-center protocol for patients who have completed a previous novartis sponsored secukinumab study and are judged by the investigator to benefit from continued secukinumab treatment\.,	an open-label, multi-center protocol for patients who have completed a previous novartis sponsored secukinumab study and are judged by the investigator to benefit from continued secukinumab treatment	0.985149	The name of the drug is Secukinumab.,	Secukinumab	of the document are New Delhi and the date is not specified in the prompt.,	16/12/2021	is AIN457 (Secukinumab) = 150.0000mg/ml In House Specification Active.,	a solution for injection in prefilled syringe.,	Secukinumab 150 mg provided in 1.0 mL pre-filled syringes (PFS) for s.c. injection, once every 4 weeks for 2 years.	Ankylosing Spondylitis or non-radiographic axial Spondylo Arthritis, Active Psoriatic Arthritis, Plague psoriasis.,	(1) ICD-10 Condition: M148||Arthropathies in other specified diseases classified elsewhere,	as follows:", "1. Clinical Research Department, Sujata Birla Hospital & Medical Research Center, Opposite Bytco College, Nashik Pune Highway, Nashik Road, Nashik-422101. Ethics committee details: Yash Society's Sujata Birla Hospital Ethics Committee,1st Floor, EC office, Sujata Birla Hospital & Medical Research Center, Opposite Bytco College, Nashik Pune Highway, Nashik Road, Nashik 422101. ECR/9…	Site 1 : All India Institute of Medical Sciences Department of Rheumatology, Sri Aurobindo Marg, Ansari Nagar, Ansari Nagar East, New Delhi-110029 New DelhiDELHI. Name of principal investigator: Dr Uma Kumar. Site 2 : ChanRe Rheumatology & Immunology Center & Research No-414/65, 20th Main, West of Chord Road, 1st Block, Rajajinagar, Bengaluru-560010BangaloreKARNATAKA. Name of principal investigat…
LambdaCT06.pdf .txt.csv	47090	CTRI/2020/09/027808 [Registered on: 15/09/2020] Trial Registered Prospectively	a phase-i, single ascending dose study to evaluate the safety, tolerability, and pharmacokinetics of adrenatab ™ sublingual tablet relative to intramuscular or subcutaneous formulations of epinephrine in normal, healthy, adult, human subjects under fasting condition.	a phase-i, single ascending dose study to evaluate the safety, tolerability, and pharmacokinetics of adrenatab™ sublingual tablet relative to intramuscular or subcutaneous formulations of epinephrine in normal, healthy, adult, human subjects under fasting condition	0.98513	Epinephrine Sublingual Tablets.	ADRENATAB™ (EPINEPHRINE SUBLINGUAL TABLETS)	4. of the document are FDA Bhawan, Kotla Road, New Delhi-110002, dated 26 AUG 2020.	15/09/2020	Epinephrine base, with varying strengths of 10 mg/20 mg/40 mg/50 mg.	Tablets.	Each Epinephrine sublingual tablets contains 10/20/40/50 mg_x000D_ Manufactured by: Belcher Pharmaceuticals, USA.	first-line treatment and self-medication for serious hypersensitivity reactions.	NORMAL, HEALTHY, ADULT, HUMAN SUBJECTS UNDER FASTING CONDITION	: - Name of Principal Investigator & Trial Sites: Dr. Shrikrishna Kolte, MBBS, MD(Pharmacology), Lambda Therapeutic research Ltd, Lambda house, Plot no. 38, Survey no. 388, Near Silver Oak Club, S.G. Highway, Gota, Ahmedabad, Gujarat. - Ethics Committee Name & Registration Number: Riddhi Medical Nursing Home Institutional Ethics Committee (RMNH), Al101, Jalaram Plaza, Jawahar Chowk, Maninagar, Ah…	Site 1 : Lambda Therapeutic Research Ltd Lambda house, Plot No. 38, Survey no. 388, Near Silver Oak Club, S. G. Highway, Gota- 382481AhmadabadGUJARAT. Name of principal investigator: Dr Shrikrishna Kolte
Sr. No. 51 CT-160-21-Sun Pharma.pdf .txt.csv	56789	CTRI/2022/05/042392 [Registered on: 05/05/2022] Trial Registered Prospectively	a phase 1 study to determine safety, tolerability, pharmacokinetics, pharmacodynamics and preliminary efficacy of sco-120 in hormone receptor positive, her-2 negative advanced breast cancer patients.	a phase 1 study to determine safety, tolerability, pharmacokinetics, pharmacodynamics and preliminary efficacy of sco-120 in hormone receptor positive, her-2 negative advanced breast cancer patients	0.985075	The names of the drug are SCO-120 (ER0721) Tablets 100 mg and SCO-120 (ER0721) Tablets 200 mg.	Part 1: Dose escalation cohort	4. New Delhi and the date is not explicitly mentioned in the prompt.	05/05/2022	not fully mentioned in the prompt, but it is mentioned that each coated tablet contains ER0721 in either mg or 200 mg and excipients.	Tablets.	Drug : SCO-120_x000D_ Dosage form: tablets _x000D_ frequency of administration: after an overnight fast of at least 8 hours and should maintain fasting for approximately 2 hours after SCO-120 dosing throughout the study._x000D_ route of administration: Oral_x000D_ total duration of therapy: approx. of 12 months treatment duration	proposed for the treatment of estrogen receptor Positive (ERα+) human epidermal growth factor receptor 2 negative (HER2-), metastatic breast cancer (MBC).	(1) ICD-10 Condition: C50||Malignant neoplasm of breast,	mentioned in the Annexure of the document. The names and address of the clinical trial sites are Amrita Institute of Medical Sciences and Research Centre, AIMS Ponekkara P O. Cochin -682041, Kerala, India; Meenakshi Mission Hospital & Research Centre, Lake Area, Melur Road, Madurai-625107 Tamil Nadu, India; Healthcare Global Enterprises Ltd, HCG-Towers, Tower-IV, 5th Floor, #8, P. Kalinga Rao Roa…	Site 1 : Amrita Institute of Medical Sciences (AIMS) Ponnekara P.O, Kochi - 682041, India ErnakulamKERALA. Name of principal investigator: Dr Pavithran Kheechilat. Site 2 : HCG Manavata cancer Centre Behind Shivang Auto, Mumbai Naka, 422002, IndiaNashikMAHARASHTRA. Name of principal investigator: Dr Aditya Adhav. Site 3 : HealthCare Global Enterprises Ltd HCG Tower, #8, P. Kalinga Rao Road, Sampa…
88 CT-92-20-Eli Lilly-CTNOC.pdf .txt.csv	49051	CTRI/2020/12/029696 [Registered on: 09/12/2020] Trial Registered Prospectively	a randomized, double-blind, placebo-controlled, phase 2 study of ly3471851 (nktr-358) in adults with systemic lupus erythematosus.	a randomized, double-blind, placebo-controlled, phase 2 study of ly3471851 (nktr-358) in adults with systemic lupus erythematosus.	0.984848	LY3471851.	LY3471851	4. The place of the document is New Delhi and the date is not specified in the prompt.	09/12/2020	- Active ingredient: LY3471851 = 1.0000 milligram (mg) In House Specification. - Inactive ingredients: Sucrose = 20.0000 milligram (mg) U.S.P., Sodium Chloride = 8.7700 milligram (mg) U.S.P., Sodium Acetate Anhydrous = 0.6000 milligram (mg) U.S.P., Glacial Acetic Acid = 0.1600 milligram (mg) U.S.P.	Injection.	Administered SC with combination of 3 dose of levels that is High Dose, Mid Dose and Low Dose in every 2 weeks._x000D_ Which can last untill 24 weeks.	Systemic Lupus Erythematosus.	(1) ICD-10 Condition: M329||Systemic lupus erythematosus, unspecified,	: - Sancheti Institute for Orthopaedics and Rehabilitation, 16 Shivajinagar, Pune-411005, Ethics committee details: Institutional Ethics Committee, Sancheti Institute for Orthopaedics and Rehabilitation, 16 Shivajinagar, Sancheti Research Center, Pune-411005, ECR/90/Inst/MH/2013/RR-20, Name of investigator: Dr. Ajit Nalawade. - Centre for Rheumatic Disease, 1988, Hermes Elegance, 11, Convent Stre…	Site 1 : All India Institute of Medical Sciences Plot No. 2, Sector - 20, MIHAN,Nagpur 441108 ,Maharashtra, IndiaNagpurMAHARASHTRA. Name of principal investigator: Dr Rajashree Khot. Site 2 : Amber Clinic 401-402 and 417 Santorini square, Behind Abhishree complex, Above Sangini Hospital, Jodhpur crossroad, Satellite, Ahmedabad, Gujarat - 380015AhmadabadGUJARAT. Name of principal investigator: Dr …
25- BBIL Intranasal .pdf .txt.csv	59902	CTRI/2021/09/036257 [Registered on: 06/09/2021] Trial Registered Prospectively	a phase 2, randomized, double blind, multicenter study to evaluate the immunogenicity, reactogenicity and safety of an intranasal adenoviral vector covid-19 vaccine (bbv154) in healthy volunteers.	a phase 2, randomized, double blind, multicenter study to evaluate the immunogenicity, reactogenicity and safety of an intranasal adenoviral vector covid-19 vaccine (bbv154) in healthy volunteers.	0.984848	Chimpanzee Adenovirus Vectored COVID-19 Vaccine (BBV154).	BBV154 INTRANASAL VACCINE	4. New Delhi, 08/08/2021.	06/09/2021	: - Active ingredient: Chimpanzee adenovirus 36 encoding SARS-CoV-2 pre-fusion stabilized spike protein (ChAd36-SARS-CoV-S) NLT 5x1010 virus particles per mL - Inactive ingredients: Tris-HCl (pH 7.4) 20 mM, Sodium Chloride 25 mM, Magnesium Chloride 2 mM, Glycerol 2.5%, Polysorbate-80 0.1%	a liquid for intranasal route of administration.	Chimpanzee adenovirus 36 encoding SARS-CoV-2_x000D_ pre-fusion stabilized spike protein (ChAd36-SARSCoV-_x000D_ 2-S) administered 0.5 mL of vaccine (BBV154) on day 0 and day 28 via intranasal route with a_x000D_ dropper.	for active immunization against Corona Virus Infections (COVID-19) caused by SARS-CoV-2.	Healthy Volunteers	: 1. Gleneagles Global Hospitals, 6-1-1070/1 to 4, Lakdi Ka Pool, Hyderabad 500004, Institutional Ethics Committee, Gleneagles Global Hospitals, 6-1-1070/1 to 4, Lakdi Ka Pool, Hyderabad 500004, ECR/158/Inst/AP/2013/RR-19, Dr. Tapaswi Krishna Patibandla 2. Radiant Superspeciality Hospital, Sabnis Plot, Kalyan nagar Square, Amravati, Maharashtra, Radiant Super Speciality Hospital Ethics Committee,…	Site 1 : AIIMS PATNA Department of Community and Family Medicine, AIIMS Patna Aurangabad Rd, Phulwari Sharif Patna Bihar 801507PatnaBIHAR. Name of principal investigator: Dr Sanjay Pandey. Site 2 : Pranaam Hospitals pvt Ltd, Hyderabad Pranaam Hospitals pvt Ltd R-55/6/40&4r, Madinaguda Miyapur, HyderabadHyderabadTELANGANA. Name of principal investigator: Dr A Krishna Prasad Ann. Site 3 : Radiant S…
Sr. No. 24 CT-124-21-Pfizer-CTNOC.pdf .txt.csv	62211	CTRI/2022/03/040770 [Registered on: 03/03/2022] Trial Registered Prospectively	\efficacy, safety, tolerability and pharmacokinetics of tofacitinib for treatment of systemic juvenile idiopathic arthritis (sjia) with active systemic features in children and adolescent subjects\.\n4	efficacy, safety, tolerability and pharmacokinetics of tofacitinib for treatment of systemic juvenile idiopathic arthritis (sjia) with active systemic features in children and adolescent subjects	0.984848	The name of the drug is Tofacitinib (CP-690,550).\n8	Tofacitinib	New Delhi and the date is not mentioned in the prompt.\n5	03/03/2022	is Tofacitinib Citrate CP-690,550-10 = 8.0780 milligram (mg) In House Specification Active.\n11	Tablets and Oral Solutions.\n10	5 mg BID oral, twice daily, tablet or solution In open-label phase: treatment with tofacitinib Treatment with investigational drug. Duration of therapy will be 12 to 40 Weeks	Systemic Juvenile Idiopathic Arthritis.\n12	(1) ICD-10 Condition: M082||Juvenile rheumatoid arthritis withsystemic onset,	as follows:", "Sr. No. | Names and address of clinical trial site | Ethics committee details | Name of investigator\n--- | --- | --- | ---\n1. | All India Institute of Medical Sciences, Dept of Pediatrics, Division of Pediatric Rheumatology, Ansari Nagar, New Delhi-110029 | IEC, Room No. 102, Old O.T. Block, All India Institute of Medical Sciences, Ansari Nagar, New Delhi-110029 | Dr. Narendra Ku…	Site 1 : All India Institute of Medical Sciences Division of Pediatric Rheumatology, Ansari Nagar, New Delhi, 110029, IndiaNew DelhiDELHI. Name of principal investigator: Dr Narendra Kumar Bagri. Site 2 : Institute of Child Health Department of Pediatrics Rheumatology, Dr Biresh Guha St, Park Circus, Ballygunge, Kolkata, West Bengal, 700017, IndiaKolkataWEST BENGAL. Name of principal investigator…
38CT33-21-AstraZeneca.pdf .txt.csv	55353	CTRI/2021/05/033819 [Registered on: 27/05/2021] Trial Registered Prospectively	phase iii study of trastuzumab deruxtecan (t-dxd) with or without pertuzumab versus taxane, trastuzumab and pertuzumab in her2-positive, first-line metastatic breast cancer (destiny-breast09).	phase iii study of trastuzumab deruxtecan (t-dxd) with or without pertuzumab versus taxane, trastuzumab and pertuzumab in her2-positive, first-line metastatic breast cancer (destiny-breast09)	0.984536	Trastuzumab Deruxtecan.	Trastuzumab Deruxtecan (T-Dxd)	4. Place: New Delhi, Date: not specified.	27/05/2021	Trastuzumab Deruxtecan =100.0000 mg/vial In-House Specification Active.	Powder for concentrate for solution for infusion.	T-DxD with or without Pertuzumab_x000D_ T-DxD Dose: every 3 weeks via IV infusion_x000D_ Pertuzumab: Loading dose intravenously on Day 1 of Cycle 1, followed by q3w in subsequent cycles	To treat patients with HER2-positive, First-line Metastatic Breast Cancer.	(1) ICD-10 Condition: C509||Malignant neoplasm of breast of unspecified site,	Details of clinical trial sites: - Apex Wellness Hospital, Survey No. 799, Plot no. 187, Behind Prakash Petrol Pump, Govind Nagar, Nashik -422009; Ethics committee details: APEX WELLNESS ETHICS COMMITTEE (AWEC), C/O- Apex Wellness Hospital, Survey No. 799, Plot no, 187, Behind Prakash Petrol Pump, Govind Nagar, Nashik - 422009; ECR/1500/Inst/MH/2021; Name of investigator: Dr. Shailesh A. Bondarde…	Site 1 : Aakash Healthcare Super Speciality Hospital Dept. of Medical Oncology Hospital Plot, Road No. 201, Sector 3, Dwarka, PIN – 110075New DelhiDELHI. Name of principal investigator: Dr Parveen Jain. Site 2 : Apex Wellness Hospital Dept. of Medical College Apex Wellness Hospital, behind Prakash Petrol pump, Govindnagar, PIN 422009NashikMAHARASHTRA. Name of principal investigator: Dr Shailesh B…
Sr. No. 74 Ct-44-22-Ms. PPD.pdf .txt.csv	72861	CTRI/2022/09/045929 [Registered on: 27/09/2022] Trial Registered Prospectively	a double-blind, placebo-controlled, multicenter study with an open-label extension to evaluate the efficacy and safety of srp-4045 and srp-4053 in patients with duchenne muscular dystrophy.	a double-blind, placebo-controlled, multicenter study with an open-label extension to evaluate the efficacy and safety of srp-4045 and srp-4053 in patients with duchenne muscular dystrophy	0.984293	The names of the drug are 4045 Casimersen and 4053 Golodirsen.	SRP-4045_x000D_ Drug: SRP-4045_x000D_ SRP-4045 solution for IV infusion_x000D_ Other Names:Casimersen_x000D_ AMONDYS 45	4. New Delhi, and the date is not specified in the prompt.	27/09/2022	4053 Golodirsen = 50.0000 mg/ml In House Specification Active and 4045 Casimersen = 50.0000 mg/ml In House Specification Active.	injection.	Participants amenable to exon 45 skipping will receive SRP-4045 IV infusions, weekly, at 30 mg/kg for up to 96 weeks in the double-blinded period. This will be followed by an open-label extension period in which all participants will receive open-label active treatment of SRP-4045 at 30 mg/kg/week IV infusions for 48 weeks (up to Week 144 in the study).	Duchenne Muscular Dystrophy.	(1) ICD-10 Condition: G710||Muscular dystrophy,	: - All India Institute of Medical Sciences, Department of Paediatrics Neurology, Teaching Block, 3rd Floor, Ansari Nagar, New Delhi - 110029, India. Ethics Committee Details: Institute Ethics Committee, All India Institute of Medical Sciences Room No. 102, Old O.T. Block, All India Institute of Medical Sciences, Ansari Nagar, New Delhi -29, South Delhi-110029. ECR/538/Inst/DL/2014/RR-20. Name of…	Site 1 : All India Institute of Medical Sciences Dept of Paediatrics Neurology, Teaching Block, 3rd Floor, Room # 3056, Ansari Nagar, New-Delhi - 110029, India New Delhi DELHI New DelhiDELHI. Name of principal investigator: Dr Shefali Gulati. Site 2 : Aster RV Hospital 4th Floor, Department of Paediatrics, CA, #37, 24th main road, ITI Layout, 1st Phase, J.P Nagar, Bengaluru, Karnataka -560078, In…
Sr. No. 43 Ct-13-22-IQVIA.pdf .txt.csv	66668	CTRI/2022/04/042014 [Registered on: 21/04/2022] Trial Registered Prospectively	a randomized, double-blind, placebo-controlled, multicenter, dose-ranging trial to evaluate the efficacy and safety of aslan004 in adult patients with moderate-to-severe atopic dermatitis	a randomized, double-blind, placebo-controlled, multicenter, dose-ranging trial to evaluate the efficacy and safety of aslan004 in adult patients with moderate-to-severe atopic dermatitis	0.984211	The name of the drug is ASLAN004	ASLAN004	of the document are New Delhi and not specified	21/04/2022	is ASLAN004 = 100.0000 mg/ml In House Specification Active	a solution for injection	Each vial is filled with 2.27 mL of ASLAN004 drug product solution with an extractable volume of 2 mL._x000D_ _x000D_ Each patient will receive ASLAN004 SC injection on Weeks 0, 1, 2, 4, 6, 8, 10, 12 and 14. _x000D_ _x000D_ The maximum injection volume will be 2 mL - 200 mg ASLAN004, with multiple injections being given to achieve doses higher than 200 mg. The maximum number of injections, per vi…	Atopic Dermatitis	(1) ICD-10 Condition: L209||Atopic dermatitis, unspecified,	The details of the clinical trial sites include the names and addresses, ethics committee details, ECR number beginning with 'ECR', and name of the investigator. The details are provided in the Annexure of the document.	Site 1 : B.J. Medical College and Civil Hospital Department of Dermatology, Asarwa - 380016AhmadabadGUJARAT. Name of principal investigator: Dr Bela Jaswantlal Shah. Site 2 : Calcutta School of Tropical Medicine Clinical Research Room, Ground Floor, 108, Chittaranjan Avenue, Medical College and Hospital, College Square - 700073KolkataWEST BENGAL. Name of principal investigator: Dr Saswati Halder.…
6Raptim-CT NOC.pdf .txt.csv	45458	CTRI/2020/08/027248 [Registered on: 19/08/2020] Trial Registered Prospectively	a randomized double-blind, placebo-controlled, multicenter, parallel group pilot study of the safety and efficacy of hydrocortisone acetate suppositories, 25 mg compared to placebo suppositories in the treatment of symptomatic internal hemorrhoids.	a randomized double-blind, placebo-controlled, multi center, parallel group pilot study of the safety and efficacy of hydrocortisone acetate suppositories, 25 mg compared to placebo suppositories in the treatment of symptomatic internal hemorrhoids	0.984	Hydrocortisone Acetate Suppositories, 25 mg.	Hydrocortisone Acetate Suppository	4. Place: New Delhi, Date: Not specified.	19/08/2020	Hydrocortisone acetate =25.0000 milligram (mg) U.S.P. Active.	Suppositories.	One Hydrocortisone Acetate Suppository, 25 mg is inserted into the anal canal twice daily (morning and evening) for 2 weeks (14 days)	Treatment of Symptomatic Internal Hemorrhoids.	(1) ICD-10 Condition: K922||Gastrointestinal hemorrhage, unspecified,	Details of clinical trial sites: - Nirmal Hospital Private Limited, Ring Road, Surat- 395002, Gujarat, India. Ethics committee details: Nirmal Hospital Pvt. Ltd. Ethics Committee, Nirmal Hospital Pvt. Ltd., Ring Road, Surat- 395002, Gujarat, India. ECR/390/Inst/GJ/2013/RR-2019. Name of investigator: Dr. Gaurish G. Gadbail. - Tristar Hospital Opp. T & TV High School, Nanpura, Surat. Gujarat- 39500…	Site 1 : Dr. Hedgewar Hospital, General surgery, Room No: 2123, Ground floor, Near Gajanand Maharaj Mandir, Jawahar colony Road, Garkheda, Aurangabad - 431005.AurangabadMAHARASHTRA. Name of principal investigator: Dr Prasad Vaidya. Site 2 : Father Muller Hospital Father Muller Medical College, General surgery, Ground floor, Father Muller Road, Kankanady, Mangalore - 575002.Dakshina KannadaKARNATA…
74Novartis.pdf .txt.csv	46451	CTRI/2020/09/027680 [Registered on: 09/09/2020] Trial Registered Prospectively	phase 3 randomized, double-blind, placebo-controlled, multi-center study to assess the efficacy and safety of ruxolitinib in patients with covid-19 associated cytokine storm (ruxcovid).	phase 3 randomized, double-blind, placebo-controlled, multi-center study to assess the efficacy and safety of ruxolitinib in patients with covid-19 associated cytokine storm (ruxcovid)	0.983957	INC424 (Ruxolitinib).	Drug: Ruxolitinib	4. of the document are New Delhi and the date is not mentioned in the prompt.	09/09/2020	INC424(Ruxolitinib) = 5.0000 milligram (mg) in-house specification active.	tablets.	Ruxolitinib 5 mg tablets twice daily (b.i.d.) for 14 days with possible extension of treatment to 28 days	COVID-19 pneumonia.	(1) ICD-10 Condition: B972||Coronavirus as the cause of diseases classified elsewhere,	: 1. Rhythm Heart Institute- A Unit of Synergy Lifecare Pvt. Ltd., Near Siddharth Bunglows, Sama-Savli Road, Vadodara-390022, Gujarat. Ethics committee details: Rhythm Heart Institute Ethics Committee, ECR/224/Inst/GJ/2013/RR-19. Name of investigator: Dr. Nirav Bhalani. 2. National Institute of Medical Sciences and Research, Shobha Nagar, Jaipur-Delhi Highway, NH-11C Jaipur-303, Rajasthan. Ethics…	Site 1 : Hindusthan Hospital Depart of Pulmonology, Hindusthan Hospital 522/3, 523/3 Nava India Road Udaiyampalayam Coimbatore-641028, Tamil Nadu, India CoimbatoreTAMIL NADU. Name of principal investigator: Dr Srikanth Krishnamurthy. Site 2 : National Institute of Medical Sciences and Research Depart of Respiratory, National Institute of Medical Sciences and Research, Shobha Nagar, Jaipur-Delhi H…
Favipiravir Tablet Mylan II.pdf .txt.csv	71511	CTRI/2022/07/043994 [Registered on: 13/07/2022] Trial Registered Prospectively	: \multicenter, open label, prospective post approval for restricted use under emergency situation study to evaluate the safety and efficacy of favipiravir 200mg and 800mg for treatment of adult indian patients with mild to moderate covid-19 disease.\\n4	multicenter, open label, prospective, post approval for restricted use under emergency situation study to evaluate the safety and efficacy of favipiravir 200mg and 800 mg for treatment of adult indian patients with mild to moderate covid-19 disease.	0.983936	: Favipiravir Film Coated Tablets 200mg and 800mg.\n8	Favipiravir Film Coated Tablets 200mg & 800 mg	: FDA Bhawan, Kotla Road, New Delhi-110002, dated 27.09.2021.\n5	13/07/2022	is: Each Film Coated Tablets contains Favipiravir 200mg and 800mg. There is no information provided about inactive ingredients.\n11	: Tablet.\n10	Day 1 dose: 800 mg (two tablets) + 200 mg (one tablet) twice on day 1 Followed by 800 mg one tablet twice daily till day 14.	: For treatment of patients with mild to moderate COVID-19 disease.\n12	(1) ICD-10 Condition: U071||COVID 19 virus identified,	:", "Sr. No. | Name of Principal Investigator & Trial sites | Ethics Committee Name/Registration Number\n--- | --- | ---\n1 | Dr. Khobragade Akash Ashok Kumar, St. Georges Hospital, Grant Government Medical College and Sir JJ Group of Hospitals, P D Mello Road, CST Mumbai, Maharashtra – 400001. | Grant Government Medical College and Sir JJ Group of Hospitals. ECR/382/Inst/MH/2013/RR-19\n2 | Dr. A…	Site 1 : Ashirwad Hospital and Research Centre 3rd floor, Department of general medicine, Maratha Section, Near Jijamata Udyan, Ulhasnagar, Thane - 421004, Maharashtra, IndiaThaneMAHARASHTRA. Name of principal investigator: Dr Shrikant Deshpande. Site 2 : Atharva Multispeciality Hospital & Research Centre Room No. H-4/comm-2, Construction Div- 21, Basement, UP Avas Vikas Parishad, Sector- E, Luck…
Permission 7.pdf .txt.csv	57680	CTRI/2021/10/037406 [Registered on: 20/10/2021] Trial Registered Prospectively	: phase 4, multicenter, prospective, interventional, post-marketing study in hemophilia a patients in india receiving advate as on-demand or prophylaxis under standard clinical practice.	phase 4, multicenter, prospective, interventional, post-marketing study in hemophilia a patients in india receiving advate as on-demand or prophylaxis under standard clinical practice	0.983871	The names of the drug are: Coagulation Factor VIII (Recombinant) rFVIII, Plasma/Albumin Free Method; Octocog Alfa.	ADVATE®-Coagulation Factor VIII (Recombinant) r FVIII I.P. (250 IU, 500 IU, 1000 IU and 1500 IU) and solvent for solution	4. : New Delhi, 03-April-2023.	20/10/2021	: - Active ingredient: rFVIII(Octocog alfa). - Inactive ingredients: α,α-Trehalose Ph.Eur 2% (w/v), Tris (hydroxymethyl) aminomethane Ph.Eur 25mM, L-Histidine Ph.Eur 25mM, Sodium chloride Ph.Eur 225mM, Calcium chloride Ph.Eur 4.2mM, Glutathione(Reduced)Ph.Eur 0.2 mg/ml, Polysorbate 80(Vegetable-derived) Ph.Eur 0.025%(w/v), Mannitol Ph.Eur 8% w/v.	: Powder and solvent for solution for injection.	1 vial contains Active Ingredient: coagulation factor VIII, _x000D_ _x000D_ Excipients: ,  - Trehalose, L- histidine, Tris – (Hydroxymethyl) Aminomethane,Sodium Chloride, , Calcium Chloride, Glutathione (Reduced), Polysorbate 80 (Vegetable derived), Mannitol_x000D_ _x000D_ Solvent: S.W. F. I. of 2 ml_x000D_ _x000D_ Dose and frequency: Subjects will be infused with a dose range of 20-50±5 IU/kg …	: Treatment and prophylaxis of bleeding in patients with haemophilia A (Congenital factor VIII deficiency) in all age groups.	, (1) ICD-10 Condition: D66||Hereditary factor VIII deficiency,	: - Site 1: St. John's Medical College, Institutional Ethical review Board (IERB), Ground Floor, St. John's Medical College, Sarjapur Road, Bangalore Karnataka - 560034. Ethics Committee Details: Institutional Ethics Committee, St. John’s Medical College & Hospital, Sarjapur Road Koramangala Bangalore-5600034, Urban Karnataka. ECR number: ECR/238/Inst/KA/2013/RR-19. Name of Principal Investigator…	Site 1 : All India Institute of Medical Sciences Department of Haematology All India Institute of Medical Sciences, Ansari Nagar, New Delhi -110029New DelhiDELHI. Name of principal investigator: Dr Tulika Seth. Site 2 : Amrita Institute of Medical Sciences and Research Centre Department of Haematology Amrita Institute of Medical Sciences, Peeliyadu Road, Ponekkara, Edappally, Ernakulam, Kerala 68…
Sr. No. 12 Ct-137-21-Dr. Reddys.pdf .txt.csv	63136	CTRI/2022/01/039850 [Registered on: 31/01/2022] Trial Registered Prospectively	\a single dose, double-blind, two-period, crossover, comparative pharmacokinetic study of three tocilizumab products administered by the subcutaneous route to normal healthy volunteers\.,	a single dose, double-blind, two-period, crossover, comparative pharmacokinetic study of three tocilizumab products administered by the subcutaneous route to normal healthy volunteers	0.983871	Tocilizumab.,	DRL_TC	New Delhi and the date is not specified.,	31/01/2022	is Tocilizumab = 162.0000 milligram (mg) In House Specification Active.,	Solution for injection.,	Tocilizumab 162mg (180mg/ml), Single dose via subcutaneous route of administration, Duration of participation in the study is 84 days (considering both the periods)	Rheumatoid Arthritis, Systemic juvenile idiopathic arthritis, Polyarticular juvenile idiopathic arthritis, Cytokine Release syndrome, giant cell arteritis.,	Not applicable	as follows:", "Sr. No. 1 - Name and address of clinical trial site: Human Pharmacology Unit, Syngene International Limited, Clinical Development, Tower I, Semicon Park, Electronic City, Phase-II, Hosur Road, Bangalore-560 100, India. Ethics committee details: IRB Services, Sri Venkateshwara Hospital Ethics Committee, Sri Venkateshwara Hospitals, #27, 29th Main Road, Rashtra Kuvempu Nagara, BTM 2n…	Site 1 : Syngene International Limited, Department - Human Pharmacology Unit,Room number - Ground floor, Clinical development Tower 1, Semicon Park, Electronic City Phase-II Hosur RoadBangaloreKARNATAKA. Name of principal investigator: Dr Kalavathy
Sr. No. 2 CT-54-22-novartis-CTNOC.pdf .txt.csv	70045	CTRI/2023/02/049813 [Registered on: 17/02/2023] Trial Registered Prospectively	\a randomized, double-blind, placebo controlled, 3-arm multicenter phase 3 study to assess the efficacy and safety of ianalumab in patients with active sjögren’s syndrome (neptunus-2)\.,	a randomized, double-blind, placebo controlled, 3-arm multicenter phase 3 study to assess the efficacy and safety of ianalumab in patients with active sjögren’s syndrome (neptunus-2)	0.983784	The name of the drug is VAY736.,	VAY736 (Ianalumab)	New Delhi and the date is not explicitly stated in the prompt.,	17/02/2023	is VAY736 = 150.0000 mg/ml In House Specification Active.,	a solution for injection.,	administered subcutaneously Arm A- 300 mg s.c. monthly	active Sjögren’s syndrome (NEPTUNUS-2).,	(1) ICD-10 Condition: M350||Sicca syndrome [Sjogren],	as follows:", "1. Bangalore Medical College and Research Institute, Victoria Hospital, K.R. Road, Fort, Bangalore, Karnataka-560002. Ethics committee details: Ethics Committee of Bangalore Medical College and Research Institute, Fort, K.R. Road, Bangalore-560002, India. ECR/302/Inst/KA/2013/RR-20. Name of investigator: Dr. Diwakar T. N.", "2. Sanjay Gandhi Postgraduate Institute of Medical Scienc…	Site 1 : AIMS Delhi Department of Rheumatoloogy, AIIMS, Ansari Nagar, New Delhi 110029EastDELHI. Name of principal investigator: DR Uma Kumar. Site 2 : Avron Hospitals Pvt. Ltd. 4. Shanti Niketan Park, Nr. Sardar Patel Statue, Naranpura, Ahmedabad-3 80013." AhmadabadGUJARAT. Name of principal investigator: DrSapan Pandya. Site 3 : Bangalore Medical College and Research Institute, Victoria Hospita…
89 CT-83-20-Medpace-CT NOC.pdf .txt.csv	49049	CTRI/2020/12/030162 [Registered on: 31/12/2020] Trial Registered Prospectively	a randomized, double-blind, multicenter, placebo-controlled phase 3 study with open-label period to evaluate the efficacy and safety of inebilizumab in adults with myasthenia gravis.	a randomized, double-blind, multicenter, placebo-controlled phase 3 study with open-label period to evaluate the efficacy and safety of inebilizumab in adults with myasthenia gravis	0.983696	Inebilizumab.	Type Name Details Intervention Inebilizumab Intravenous 300mg inebilizumab or Placebo; AChR-Ab+ subject will receive inebilizumab or placebo at RCP Days 1, 15, and 183. MuSK-Ab+ subject will receive inebilizumab or placebo at RCP Days 1 and 15._x000D_ Those randomized to inebilizumab in the RCP will receive inebilizumab at OLP Days 1 & 183 and placebo at OLP Day 15._x000D_ Comparator Agent Placeb…	4. Place: New Delhi, Date: not specified.	31/12/2020	Inebilizumab = 10.0000 mg/ml Active.	Sterile liquid for IV administration.	Type	To treat myasthenia gravis.	(1) ICD-10 Condition: G700||Myasthenia gravis,	: 1. Institute of Neurosciences, Near Valentino Business Hub, BRTS Canal Road, Opp. Khatodara BRTS Bus Stand, Surat, Gujarat-395001, Ethics committee details: Unity Hospital Ethics Committee, Unity Hospital, Unity Trauma Center and ICU, N-4 Janki Park Society, Aai Mata Road, Paravat Patiya, Surat - 395010, Gujarat, India, ECR/6/Inst/GJ/2019, Name of investigator: Dr. Anirudha Apte. 2. Shree Siddh…	Site 1 : Bangalore Medical College and Research Institute Fort, K.R. Rd, Bengaluru, 560002, IndiaBangaloreKARNATAKA. Name of principal investigator: Dr Parveen Kumar. Site 2 : Christian Medical College Vellore Ida Scudder Road, Vellore,632004VelloreTAMIL NADU. Name of principal investigator: Dr Arun Mathai Mani. Site 3 : Deenanath Mangeshkar Hospital and Research Centre, Erandwane, 411004 ,IndiaP…
Sr. No. 5 Ct-120-21-AstraZeneca.pdf .txt.csv	60018	CTRI/2022/02/040015 [Registered on: 04/02/2022] Trial Registered Prospectively	a multicenter randomized double-blind placebo-controlled phase 3 study to evaluate the efficacy and safety of anifrolumab in adult patients with active proliferative lupus nephritis.	a multicenter randomized double-blind placebo-controlled phase 3 study to evaluate the efficacy and safety of anifrolumab in adult patients with active proliferative lupus nephritis	0.983696	Anifrolumab.	Anifrolumab	4. New Delhi and the date is not explicitly mentioned in the prompt.	04/02/2022	Anifrolumab (MEDI-546) = 150.0000 mg/ml In House Specification Active.	Concentrate for solution for infusion.	Anifrolumab + Standard of Care (Mycophenolate Mofetil (MMF)+ Glucocorticoid) _x000D_ Frequency-Every 4 weeks, Route of administration: IV and Duration: Week 0 to 100.	Adult Patients with Active Proliferative Lupus Nephritis.	(1) ICD-10 Condition: D899||Disorder involving the immune mechanism, unspecified,	: - Max Super Speciality Hospital, 1 Press Enclave Road, Saket, New Delhi-110017, Ethics committee details: Max Healthcare Ethics Committee, ECR/110/Inst/DL/2013/RR-19, Name of investigator: Dr. Dinesh Khullar. - Shalby Hospital, Opp. Karnavati Club, S. G. Highway, Ahmedabad-380015, Gujarat, Ethics Committee - Shalby Limited, ECR/711/Inst/GJ/2015/RR-21, Name of investigator: Dr. Kamal. R Goplani.…	Site 1 : Aakash Healthcare Private Limited Dept. of Nephrology, Hospital Plot, Road No. 201 Dwarka Sector - 3 New Delhi, PIN– 110075 New DelhiDELHI. Name of principal investigator: Dr Umesh Gupta. Site 2 : All India Institute of Medical Sciences, New Delhi Room no. 4076, 4th Floor, Teaching Block, Ansari Nagar PIN- 110029New DelhiDELHI. Name of principal investigator: Dr Uma Kumar. Site 3 : Krish…
21_BIL COVID vaccine.pdf .txt.csv	58694	CTRI/2021/08/035425 [Registered on: 04/08/2021] Trial Registered Prospectively	a phase i, open label, dose escalation, randomized, multicenter study to evaluate the reactogenicity, safety, and immunogenicity of an intramuscular inactivated rabies vector platform corona virus vaccine (rdna-bbv151) in healthy volunteers.	a phase 1, open label, dose escalation, randomized, multicenter study to evaluate the reactogenicity, safety, and immunogenicity of an intramuscular inactivated rabies vector platform corona virus vaccine (rdna-bbv151) in healthy volunteers	0.983539	Coronavirus vaccine (rDNA) – BBV151.	BBV151	4. of the document are New Delhi, 09.07.2021.	04/08/2021	: - Active ingredient: Purified, BPL Inactivated Corona virus (rDNA) Antigen NLT 30 mcg - Inactive ingredients: Phosphate Buffered Saline Q.s. to 0.25 ml and SEPIVAC SWE - Oil in water (O/W) emulsion* 0.25 ml. *Squalene based Oil in Water emulsion	Liquid injection for intramuscular route.	0.25 ml administered intramuscular at day 0 and day 28 in Group 1 and Group 3_x000D_ 0.5 ml administered intramuscular at day 0 and day 28 in Group 2 and Group 4	For active immunization against Corona Virus Infections (SARS-CoV-2) COVID-19.	to prevent Corona Virus Infection	are : - Clinical Trial Site 1: Shree Hospital Unit, Plot No. 786A, Behind Shree Hospital & Critical Care Center, Mirchi Bazar, Sakkardara Sq, Nagpur - 440 009, Maharashtra. Ethics Committee details: Shree Hospital Ethics Committee, ECR/553/Inst/MH/2014/RR-20. Name of Principal Investigator: Dr Akash Balki. - Clinical Trial Site 2: Jeevan Rekha Hospital, Dr. B. R Ambedkar Road, Belagavi – 590 002.…	Site 1 : Jeevan Rekha Hospital Room no 101 First Sloor Department of Medicine Dr B R Ambedkar Road BelgaviBangaloreKARNATAKA. Name of principal investigator: Dr Suresh G Bhate. Site 2 : Prakhar Hospital, Kanpur Room No 303 Department of Clinical Research 8/219 Arya Nagar KanpurKanpur NagarUTTAR PRADESH. Name of principal investigator: Dr Jitendra Singh Kushwaha. Site 3 : Shree Hospital and Critic…
Sr. No. 75 CT-34-21-Novartis.pdf .txt.csv	51695	CTRI/2021/10/037098 [Registered on: 05/10/2021] Trial Registered Prospectively	a 5-year, randomized, double-blind, placebo-controlled, multi-center study assessing the efficacy, safety, and tolerability of intra-articular regimens of lna043 versus placebo in patients with symptomatic knee osteoarthritis (onwards).	a 5-year, randomized, double blind, placebo-controlled, multi-center study assessing the efficacy, safety, and tolerability of intra-articular regimens of lna043 versus placebo in patients with symptomatic knee osteoarthritis (onwards)	0.983193	LNA043.	LNA043	4. New Delhi, with no specific date mentioned.	05/10/2021	LNA043 =10.0000 milligram (mg) In House Specification Active.	injection (lyophilizate in Vial).	LNA043 in different doses (20 mg and 40 mg), number of injections in a cycle (1 vs 3) and dosing cycle frequency (every 6 months vs every 12 months)	symptomatic knee osteoarthritis.	(1) ICD-10 Condition: M179||Osteoarthritis of knee, unspecified,	: - M S Ramaiah Medical College and Hospitals, MSRIT Post, Bangalore-56005, Karnataka, India. Ethics committee details: Ethics Commttee, M S Ramaiah Medical College and Hospitals, M S Ramaiah Nagar, MSRIT Post, Bangalore-560054 Karnataka, India. Investigator name: Dr. Naresh Shetty. - Rhythm Heart Institute- A Unit of Synergy Lifecare Pvt. Ltd., Near Siddharth Bunglows, Sama-Savli Road, Vadodara-…	Site 1 : CIMETs Inamdar Multispeciality Hospital S. No. 15, Fatima Nagar, Behind KPCT Mall, Wanwadi, Pune-411040PuneMAHARASHTRA. Name of principal investigator: Dr Qaedjohar O Dhariwala. Site 2 : GSVM Medical College Department of Orthopedic, GSVM Medical College, Swaroop Nagar, Kanpur, Uttar Pradesh- 208002, IndiaKanpur NagarUTTAR PRADESH. Name of principal investigator: Dr Rajendra Kumar Verma.…
Sr No. 83 CT-34-22-Lupin-CTNOC.pdf .txt.csv	72922	CTRI/2023/03/050806 [Registered on: 17/03/2023] Trial Registered Prospectively	a phase iii, prospective, randomized, parallel group, double-blind, multicentre study to compare the efficacy, safety and immunogenicity of lupin’s aflibercept with eylea® in patients with neovascular age-related macular degeneration.	a phase iii, prospective, randomized, parallel group, double-blind, multicentre study to compare the efficacy, safety, and immunogenicity of lupin’s aflibercept with eylea® in patients with neovascular age-related macular degeneration	0.983051	The name of the drug is LUBT017 (Aflibercept)	Lupin’s Aflibercept	of the document are New Delhi and the date is not specified	17/03/2023	is Aflibercept = 40.00 mg/ml (in house specification) Active	Solution for injection (IVT)	Lupin’s Aflibercept will be administered at a dose of 2 mg every 4 weeks for initial 12 weeks and thereafter every 8 weeks (last dose at Week 40) as intravitreal injection (study duration will be approximately 52 weeks for each patient which will include: Screening Period up to 28 days and Treatment Period of 48 weeks	Neovascular (wet) Age-related Macular Degeneration	(1) ICD-10 Condition: H353||Degeneration of macula and posterior pole,	as follows: 1. Shivam Retina Clinic and Eye Hospital, HG-1 A, ITC Building, Majura Gate, Ring Road, Surat-395001, Gujarat. Ethics committee details: Unity Hospital Ethics Committee, Unity Trauma Center and ICU, N-4 Janki Park Society, Aai Mata Road, Paravat Patiya, Surat Gujarat – 395010. ECR number: ECR/1032/Inst/GJ/2017. Name of the investigator: Dr. Shobhana J. Mange. 2. Anideep Eye Hospital, …	Site 1 : Agrawal Hospital SP 3 Malviya Nagar, Industrial Area, Calgary Circle Malviya Nagar-302017JaipurRAJASTHAN. Name of principal investigator: Dr Vishal Agrawal. Site 2 : AIIMS Raipur Gate No 4, Tatibandh GE Road, -492099RaipurCHHATTISGARH. Name of principal investigator: Dr Vijaya Sahu. Site 3 : Ambade Eye Hospital 1st Floor Kamla Tower, Near Jaswant Talkies Indora Square Kamptee Road-440017…
Sr. No. 66-CT-57-21-Pfizer.pdf .txt.csv	57794	CTRI/2021/10/037186 [Registered on: 08/10/2021] Trial Registered Prospectively	an open-label, multicenter, randomized phase 3 study of first-line encorafenib plus cetuximab with or without chemotherapy versus standard of care therapy with a safety lead-in of encorafenib and cetuximab plus chemotherapy in participants with metastatic braf v600e-mutant colorectal cancer.	an open-label, multicenter, randomized phase 3 study of first-line encorafenib plus cetuximab with or without chemotherapy versus standard of care therapy with a safety lead-in of encorafenib and cetuximab plus chemotherapy in participants with metastatic braf v600e mutant colorectal cancer	0.982993	PF-07263896 (Encorafenib).	Experimental: Phase 3 Arm A	4. New Delhi and the date is not mentioned in the prompt.	08/10/2021	PF-07263896 (Encorafenib)=75.0000 milligram (mg) (Active).	Capsules.	Encorafenib 300 mg orally once daily Cetuximab 500 mg/m2 (120-minute IV infusion) every two weeks. The duration of therapy will be approximately 10 months	the treatment of Colorectal cancer.	(1) ICD-10 Condition: C189||Malignant neoplasm of colon, unspecified, (2) ICD-10 Condition: C20||Malignant neoplasm of rectum,	- Tata Memorial Centre, Dr. E Borges road, Pare!, Mumbai- 4000 Ethics committee details: Institutional Ethics Committee I / II, 3rd Floor, Main building. Tata Memorial Hospital, Dr E Borges Road, Parel, 4000 ECR number: ECR/149/lnst/MH/2013/RR-16 Name of the investigator: Dr. Vikas Suresh Chand Ostwal - Rajiv Gandhi Cancer Institute and Research Centre, Sector-5, Rohini, New Delhi -110085 Ethics …	Site 1 : Bhaktivedanta Hospital & Research Institute Clinical Research Department, 5th floor, Bhaktivedanta Hospital & Research Institute , Srishti Complex, Bhaktivedanta Swami Marg, Mira road ( E), Thane – 401107, Maharashtra, India.ThaneMAHARASHTRA. Name of principal investigator: Dr Nirmal Vivek Raut. Site 2 : Department of Medical oncology Room no. 14-15, 1st Floor, Clinical research room, De…
Sr. o. 53 CT-16-22-Novo-Nordisk.pdf .txt.csv	64489	CTRI/2022/05/042825 [Registered on: 26/05/2022] Trial Registered Prospectively	: open-label study investigating efficacy, safety and pharmacokinetics of concizumab prophylaxis in children below 12 years with haemophilia a or b with or without inhibitor.	open-label study investigating efficacy, safety and pharmacokinetics of concizumab prophylaxis in children below 12 years with haemophilia a or b with or without inhibitors	0.982759	The names of the drug are: Concizumab 10mg/ml, Concizumab 40mg/ml, Concizumab 100mg/ml.	Concizumab	4. : New Delhi, date not specified.	26/05/2022	: Concizumab =10.0000 mg/ml In House Specification Active/ Concizumab =40.0000 mg/ml In House Specification Active/ Concizumab =100.0000 mg/ml In House Specification Active, Water for injections =1.0000 Volume/Volume(V/v) U.S.P.,J.P., Ph. Eur Inactive, Sodium Hydroxide = q.s. U.S.P., J.P., Ph. Eur Inactive, Hydrogen Chloride = q.s. U.S.P.,J.P., Ph. Eur Inactive, Phenol =3.5000 mg/ml U.S.P.,J.P., …	: Solution for injection.	Initially 0.20 mg/kg daily followed by 0.15, 0.20 or 0.25 mg/kg daily though Subcutaneous route.The maximum duration of intervention for each participant is 104 weeks	: haemophilia A or B with or without inhibitors.	(1) ICD-10 Condition: D67||Hereditary factor IX deficiency, (2) ICD-10 Condition: D66||Hereditary factor VIII deficiency,	: - Department of Paediatrics, J K Loan Hospital, Attached to SMS Medical College, Jaipur-302004. Ethics committee details: Ethics Committee SMS Medical College & Attached Hospitals, JLN Marg, Jaipur, Rajasthan-302004, India. ECR number: ECR/26/Inst/RJ/2013/RR-19. Name of the investigator: Dr. Kapil Garg. - Sahyadri Super Speciality Hospital, 30C, Erandwane, Karve Road- Pune-411004, Maharashtra, …	Site 1 : J K Lon Hospital Department of Paediatrics, J K Lon Hospital, Attached to SMS Medical college -302004JaipurRAJASTHAN. Name of principal investigator: Dr Kapil Garg. Site 2 : Nirmal Hospital Pvt Ltd Ring Road, Surat – 395002SuratGUJARAT. Name of principal investigator: Dr Nirmalkumar Ganeshmal Choraria. Site 3 : Post Graduate Institute of Child Health Department of Pediatric Hematology-On…
42_Biologicla E COVID.pdf .txt.csv	64413	CTRI/2022/01/039366 [Registered on: 12/01/2022] Trial Registered Prospectively	\a prospective double-blind randomised phase iii clinical study to evaluate the immunogenicity and safety of single booster dose of biological e’s corbevax vaccine when administered to covid-19-negative adult volunteers previously vaccinated with 2-doses of either covishield or covaxin\.,	a prospective double-blind randomised phase iii clinical study to evaluate the immunogenicity and safety of single booster dose of biological e’s corbevax vaccine when administered to covid-19-negative adult volunteers previously vaccinated with 2-doses of either covishield or covaxin.	0.982699	SARS-CoV-2 (Covid-19) Vaccine (RBD antigen of SARS CoV-2 (Covid-19)).,	Biological E’s CORBEVAX Vaccine	4. of the document are: Place - New Delhi, Date - 28.12.2021.,	12/01/2022	: \n- Active ingredient: RBD antigen of SARS CoV-2 (Covid-19)1 25 μg\n- Inactive ingredients: Aluminium Hydroxide gel as Al++ 750 μg, CpG 1018 750 μg, Buffer (Tris and NaCl in WFI)* q.s to 0.5 mL. ,	a solution for injection by intramuscular route.,	Dose: 0.5ml, Route of administration: Intramuscular injection, Frequency: Single dose booster at Day 0 along with subsequent follow-up on Day 28, Day 180 & Day 270.	for active immunization against COVID-19 disease 18 years and above.,	Active immunization for the prevention of COVID-19 disease	" :\n- ESIC Medical College & Hospital, Room No. 440, 4th Floor, NH-3 behind BK Hospital New Industrial Town Faridabad -001, Haryana, India. Ethics Committee details: Institutional Ethics Committee for ESIC ESIC Medical College and Hospital, NH-3 behind BK Hospital New Industrial Town Faridabad -001, Haryana, India. Name of Principal Investigator: Dr. Anil Kumar Pandey.\n- Grant Medical College &…	Site 1 : AIG Hospital Department of Cardiology, AIG Hospital, 4th floor, Plot No. 2/3/4/5, Survey No. 136/1, Mindspace Road, GachibowliHyderabadTELANGANA. Name of principal investigator: Dr P Naveen Chander Reddy. Site 2 : ESIC Medical College & Hospital, Department of Physiology, Room No. 440, 4th Floor, NH-3 behind BK Hospital New Industrial Town-121001FaridabadHARYANA. Name of principal invest…
2Dienogest 2mg Tablet -Sun.pdf .txt.csv	67751	CTRI/2022/04/041959 [Registered on: 20/04/2022] Trial Registered Prospectively	a prospective, multi-center, single arm, phase iv study to assess the safety and efficacy of dienogest tablets in management of pelvic pain associated with endometriosis.	a prospective, multi-center, single arm, phase iv study to assess the safety and efficacy of dienogest tablets in management of pelvic pain associated with endometriosis	0.982558	Dienogest Tablets 2 mg.	Dienogest Tablets 2 mg	4. FDA Bhawan, Kotla Road, New Delhi-110002, dated July 8, 2021.	20/04/2022	Dienogest 2 mg (active ingredient).	tablets.	One tablet taken orally every day for 12 weeks	for the management of pelvic pain associated with endometriosis.	(1) ICD-10 Condition: N809||Endometriosis, unspecified,	: - Dr. Viral T Luhar, Hi-tech Multispeciality Hospital, Sector 3-D, Plot No. 1180, Gh Road, Near Gh- 11/2 Bus Stand, Gandhinagar, Gujarat-382003, India. Ethics Committee: Hi-Tech Ethics Committee (HEC). ECR/1057/Inst/GJ/2018. - Dr. Shital Natwarlal Kapadia, Department of Gynecology, B.J. Medical college & Civil hospital, Asarwa, Ahmedabad -380016, Gujarat, India. Ethics Committee: Institutional …	Site 1 : Apollo Institute of Medical Sciences and Research Department of OBGYN, Room No. 2, Apollo Institute of Medical Sciences and Research, Apollo Hospitals, Jubillee Hills, Hyderabad 500096, Telangana, IndiaHyderabadTELANGANA. Name of principal investigator: Dr Krishna Kumari Meka. Site 2 : B J Govt Medical College and Sassoon General Hospitals 3rd Floor, Department of Obst. and Gynaec, B J G…
32 Ct-13-21-IQVIA.pdf .txt.csv	55489	CTRI/2021/04/033241 [Registered on: 29/04/2021] Trial Registered Prospectively	an open-label, multi-center, roll-over study to assess long term safety in patients with endogenous cushing’s syndrome who have completed a prior novartis-sponsored osilodrostat (lci699) study and are judged by the investigator to benefit from continued treatment with osilodrostat.	an open-label, multi-center, roll-over study to assess long term safety in patients with endogenous cushing’s syndrome who have completed a prior novartis-sponsored osilodrostat (lci699) study and are judged by the investigator to benefit from continued treatment with osilodrostat.	0.982456	Osilodrostat (LCI699).	Osilodrostat	4. The place of the document is New Delhi and the date is not mentioned in the prompt.	29/04/2021	LCI699 phosphate, with active ingredients specified as 1.4310 milligram (mg) In House Specification Active, 7.1550 milligram (mg) In House Specification Active, and 14.3milligram (mg) In House Specification Active.	a film-coated tablet.	Osilodrostat (LCI699) will be given in form of filmcoated_x000D_ tablets for oral administration, and available in the following dose strengths: 1 mg, 5 mg and 10 mg. Patients will receive the same dose as the dose provided in the parent osilodrostat study at the time of transition to the roll-over study and for the entire duration of the study	Endogenous Cushing’s Syndrome.	(1) ICD-10 Condition: E240||Pituitary-dependent Cushings disease,	: - All India Institute of Medical Sciences Ansari Nagar New Delhi-I I 0029 - Ethics committee details: AIIMS Ethics Committee, Room No. First Floor, Old OT Block, All India Institute of Medical Sciences Ansari Nagar New Delhi -I I 0029 - ECR/538/Inst/DL/2014/RR-20 - Name of the investigator: Dr. Viveka P. Jyotsna.	Site 1 : All India Institute of Medical Sciences Room No.: 58, DEXA room, Ground Floor, Raj Kumari Amrit KAur OPD Block, Ansari Nagar, New Delhi – 110029New DelhiDELHI. Name of principal investigator: Dr Viveka P Jyotsna
15_SERUM_Typhoid.pdf .txt.csv	70977	CTRI/2022/06/043608 [Registered on: 30/06/2022] Trial Registered Prospectively	a double-blind, randomized, active controlled phase i clinical study to assess the safety and tolerability of sii typhoid conjugate vaccine (bivalent) in healthy adults.	a double-blind, randomized, active controlled phase i clinical study to assess the safety and tolerability of sii typhoid conjugate vaccine (bivalent) in healthy adults	0.982456	Typhoid Conjugate Vaccine (Bivalent).	SII TYPHOID CONJUGATE VACCINE (BIVALENT)	4. New Delhi, 17.06.2022.	30/06/2022	: - Active ingredients: Purified Vi polysaccharide from Salmonella Typhi conjugated to Tetanus Toxoid (25 μg) and Purified O-Specific Polysaccharide from Salmonella Paratyphi A is conjugated to Diphtheria Toxoid (25 μg). - Inactive ingredients: Tris Buffer (0.30 mg), Mannitol (25 mg), 2 Phenoxyethanol* (2.5 mg), Water for Injection (q.s.). (*for multi dose presentation only)	Solution for injection (Intramuscular).	SII Typhoid Conjugate Vaccine (Bivalent) is a bivalent conjugate vaccine manufactured by SIIPL that contains conjugated antigens from S. Typhi and S. Paratyphi A serotypes. The purified Vi-polysaccharide (PS) from Salmonella Typhi is covalently conjugated to purified Tetanus Toxoid (TT) carrier protein and purified O-specific polysaccharide (OSP) is conjugated to purified Diphtheria Toxoid (DT) c…	for active immunization for prevention of Typhoid Fever and Paratyphoid A Fever.	SII Typhoid Conjugate Vaccine (Bivalent) is recommended for active immunization for prevention of Typhoid Fever and Paratyphoid A Fever.	: - Clinical Trial Site 1: Human Pharmacology Unit, Syngene International Limited, Clinical Development, Tower I, Semicon Park, Electronic City Phase II, Hosur Road, Bengaluru – 560 100, India. - Ethics Committee details for Clinical Trial Site 1: Sri Venkateshwara Hospital Ethics Committee, Sri Venkateshwara Hospitals, #27, 29th Main Road, Rashtra Kuvempu Nagara, BTM 2nd Stage, BTM Layout, Benga…	Site 1 : Human Pharmacology Unit Syngene International Limited Clinical Development Tower – 1, Semicon Park Electronic City Phase II Bangalore – 560 100, India.BangaloreKARNATAKA. Name of principal investigator: Dr Anil K
Sr. No. 73 CT-43-21-Medpace.pdf .txt.csv	60307	CTRI/2021/10/037121 [Registered on: 06/10/2021] Trial Registered Prospectively	a phase iib randomized, double-blinded, placebo-controlled, dose-ranging study to evaluate the efficacy and safety of atacicept in subjects with iga nephropathy (igan).	a phase iib randomized, double-blinded, placebo-controlled, dose-ranging study to evaluate the efficacy and safety of atacicept in subjects with iga nephropathy (igan)	0.982353	Atacicept.	Atacicept	4. Place: New Delhi, Date: not specified.	06/10/2021	: - Atacicept = 150.0000 mg/ml In House Specification Active - Atacicept = 75.0000 mg/ml In House Specification Active - Atacicept = 25.0000 mg/ml In House Specification Active.	Ready to use injection solution.	Part A: Atacicept 25mg, 75mg, 150mg will be administered as once weekly subcutaneous (SC) injections to IgAN participants over the course of 36 weeks. _x000D_ Part B: Atacicept 150mg will be administered as once weekly subcutaneous (SC) injection to IgAN participants over the course of 60 weeks.	IgA Nephropathy.	(1) ICD-10 Condition: N29||Other disorders of kidney and ureter in diseases classified elsewhere,	: - Muljibhai Patel Urological Hospital, Dr. Virendra Desai Road, Nadiad, Gujarat-387001, Ethics Committee: Muljibhai Patel Society for Research in Nephro-Urology Ethics Committee, ECR/276/Muljibhai/Inst/GJ/2013/RR-19, Name of investigator: Dr. Virendra Desai. - Deep Kidney Care, Opp. Deep Hospital, Model Town, Ludhiana, Ethics Committee: Institutional Ethics Committee Deep Hospital, ECR/525/Inst…	Site 1 : Christian Medical College and hospital, Department of Nephrology, Ida Scudder road, Vellore-632004.VelloreTAMIL NADU. Name of principal investigator: Dr Suceena Alexander. Site 2 : Deep Hospital, Deep Kidney Care, Opp. Deep hospital, Model Town, Ludhiana-141002, PunjabLudhianaPUNJAB. Name of principal investigator: Dr Rajan Isaacs. Site 3 : Government Medical College, Thiruvananthapuram,…
Sr. No. 30 CT-125-21-Ssanofi.pdf .txt.csv	62198	CTRI/2022/05/042593 [Registered on: 17/05/2022] Trial Registered Prospectively	\a randomized double-blind placebo-controlled parallel group study assessing the efficacy and safety of dupilumab in patients with allergic fungal rhinosinusitis (afrs)\. ,	a randomized double-blind placebo-controlled parallel group study assessing the efficacy and safety of dupilumab in patients with allergic fungal rhinosinusitis (afrs)	0.982353	Dupilumab and Dupixent®. ,	Dupilumab	New Delhi and the date is not mentioned in the prompt. ,	17/05/2022	Glacial Acetic Acid, Sucrose, L-Histidine Monohydrochloride Monohydrate, Polysorbate 80, Sodium Acetate Trihydrate, L-Arginine Monohydrochloride, L-Histidine, and REGN668. The active ingredient is REGN668. ,	Solution for injection. ,	Dupilumab 300 mg: a 150 mg/mL dupilumab solution in a pre-filled syringe to deliver 300 mg in a 2 mL injection _x000D_ Dupilumab 200 mg: a 175 mg/mL dupilumab solution in a pre-filled syringe to deliver 200 mg in a 1.14 mL injection_x000D_ Unit dose strength(s) 200 and 300 mg/mL _x000D_ Route of Administration: Sub Cutaneous injection_x000D_ _x000D_ Total duration of intervention: 52 weeks	Allergic Fungal Rhinosinusitis (AFRS). ,	(1) ICD-10 Condition: J308||Other allergic rhinitis,	The details of the clinical trial sites include the names and addresses of the sites, ethics committee details, ECR number beginning with 'ECR', and name of the investigator. The sites are All India Institute of Medical Sciences in Jodhpur, Rajasthan; Madras ENT Research Foundation in Chennai, Tamil Nadu; Post Graduate Institute of Medical Education & Research in Chandigarh; and Hindusthan Hospit…	Site 1 : All India Institute of Medical Sciences (AIIMS) Basni, Jodhpur-342005, RajasthanJodhpurRAJASTHAN. Name of principal investigator: Dr Kapil Soni. Site 2 : Batra Hospital & Medical Research Centre Department of ENT, Batra Hospital and Medical Research Centre, 1, Tughlakabad, M. B. Road, New Delhi- 110062, IndiaNew DelhiDELHI. Name of principal investigator: Dr Sunil Kumar Kathuria. Site 3 …
Sr. No. 38 CT-06-20-Siro.pdf .txt.csv	46796	CTRI/2020/09/027969 [Registered on: 22/09/2020] Trial Registered Prospectively	a phase 2 randomized, double-blind, placebo-controlled, proof of concept study to evaluate the efficacy and safety of vib4920 in subjects with sjögren’s syndrome (ss).	a phase 2 randomized, double-blind, placebo-controlled, proof of concept study to evaluate the efficacy and safety of vib4920 in subjects with sjögren’s syndrome (ss)	0.982249	VIB4920.	VIB4920	4. of the document are Place: New Delhi, Date: not specified.	22/09/2020	VIB4920 =100.0000 mg/ml In House Specification Active.	injection.	Subjects will receive 1500 mg VIB4920 as an IV infusion Q2W-3 doses, then_x000D_ Q4W - 4 additional doses (Stage I)_x000D_ Starting on Day 169 subjects will receive placebo_x000D_ Q4W for 5 doses (Stage II)._x000D_ IV-intravenous_x000D_ Q2W-once every 2 weeks_x000D_ Q4W-once every 4 weeks	Sjogren's Syndrome.	(1) ICD-10 Condition: M00-M99||Diseases of the musculoskeletal system and connective tissue,	Details of clinical trial sites: - Noble Hospital, Basement, Noble Annex, Noble Hospital Pvt. Ltd., 153/A, Magarpatta city road, Hadapsar, Pune-411013, Maharashtra, India; Noble Hospital Institutional Ethics Committee, Noble Hospitals Pvt. Ltd., Room No. 5, Clinical Research Department Noble Annex, , 153/A, Magarpatta city road, Hadapsar, Pune-411013, Maharashtra, India; ECR/302/Inst/KA/2013/RR-1…	Site 1 : Apollo Hospitals, Bhubaneswar Department of Rheumatology. Plot no 251, Sainik School Rd, Unit 15, Gajapati Nagar, Bhubaneswar, Odisha 751005KhordhaORISSA. Name of principal investigator: Dr Ajit Kumar Surin. Site 2 : Bangalore Medical College and Research Institute, Victoria hospital Krishna Rajendra Rd, Fort, Bengaluru, Karnataka 560002BangaloreKARNATAKA. Name of principal investigator:…
Sr. No. 117 CT-123-21-Astrazeenca.pdf .txt.csv	63297	CTRI/2022/01/039210 [Registered on: 06/01/2022] Trial Registered Prospectively	\a phase 3 open-label trial of neoadjuvant trastuzumab deruxtecan (t-dxd) monotherapy or t-dxd followed by thp compared to ddac-thp in participants with high-risk her2-positive early-stage breast cancer (destiny-breast11)\.,	a phase 3 open-label trial of neoadjuvant trastuzumab deruxtecan (t-dxd) monotherapy or t-dxd followed by thp compared to ddac-thp in participants with high risk her2-positive early-stage breast cancer (destiny-breast11)	0.982063	Trastuzumab deruxtecan.,	ARM A:_x000D_ Trastuzumab Deruxtecan (T-Dxd)_x000D_ _x000D_ ARMB: _x000D_ T-Dxd PLUS THP	of the document are New Delhi and the date is not specified.,	06/01/2022	Trastuzumab deruxtecan, L-Histidine hydrochloride monohydrate, Sucrose, and Polysorbate 80.,	lyophilized powder conc for solution for infusion.,	ARM A: Participant will receive T-DXd - IV Q3W) for 8 cycles_x000D_ _x000D_ ARM B: Participants will receive T-DXd (IV Q3W) for 4 cycles, followed by paclitaxel (IV QW on Days 1, 8, and 15) concurrent with trastuzumab (IV Q3W on Day 1), and pertuzumab (IV loading dose followed by IV Q3W on Day 1) for 4 cycles.	high-risk HER2-positive early-stage breast cancer.,	(1) ICD-10 Condition: C509||Malignant neoplasm of breast of unspecified site,	The details of the clinical trial sites include the names and addresses of the sites, ethics committee details, ECR number beginning with 'ECR', and name of the investigator. The sites are Artemis Hospital in Gurugram, Regional Cancer Centre in Thiruvananthapuram, Kasturba Medical College and Campus in Manipal, HCG Manavata Cancer Centre in Nashik, HCG Cancer Centre in Mumbai, HCG Cancer Centre i…	Site 1 : All India Institute of Medical Sciences Dept. of Medical Oncology Veerbhadra Marg Rishikesh-249203 (Uttarakhand), India. Name of principal investigator: Dr Amit Sehrawat. Site 2 : Artemis Hospital Dept. of Medical Oncology Sector 51, Gurugram,122001 GurgaonHARYANA. Name of principal investigator: Dr Vineet Govinda Gupta. Site 3 : Deep Hospital Dept. of Medical Oncology 481, Model Town, L…
Sr. No. 86 CT-70-21-Roche.pdf .txt.csv	59256	CTRI/2021/10/037317 [Registered on: 13/10/2021] Trial Registered Prospectively	\a phase iii, open-label, multicenter, randomized study evaluating the safety and efficacy of polatuzumab vedotin in combination with rituximab plus gemcitabine plus oxaliplatin (r-gemox) versus r-gemox alone in patients with relapsed/refractory diffuse large b- cell lymphoma\. ,	a phase iii, open-label, multicenter, randomized study evaluating the safety and efficacy of polatuzumab vedotin in combination with rituximab plus gemcitabine plus oxaliplatin (r-gemox) versus r-gemox alone in patients with relapsed/refractory diffuse large b-cell lymphoma	0.982014	\Polatuzumab Vedotin for Injection 140mg\. ,	Gemcitabine	of the document are \New Delhi\ and the date is not mentioned. ,	13/10/2021	\Polatuzumab Vedotin = 140 mg/vial In House Specification Active Succinic Acid = 8.27mg/vial U.S.P., J.P. Inactive Sodium Hydroxide = 3.8 mg/vial U.S.P., E.P., J.P. Inactive Sucrose = 288.0 mg/vial U.S.P., E.P., J.P. Inactive Polysorbate 20 = 8.4 mg/vial U.S.P., E.P., J.P. Inactive\. ,	\Injection\. ,	1000 mg/m2 on Day 2 of 8 cycles	\For patients with relapsed/refractory diffuse large B -cell lymphoma\. ,	(1) ICD-10 Condition: C88||Malignant immunoproliferative diseases and certain other B-cell lymphomas,	The details of the clinical trial sites include the names and addresses of the sites, ethics committee details, ECR number beginning with 'ECR', and name of the investigator. The sites are Tata Medical Center in Kolkata, Tata Memorial Hospital in Mumbai, and Dr. B R A Institute Rotary Cancer Hospital in New Delhi. The ethics committee details and ECR numbers are also provided in the prompt. The n…	Site 1 : All India Institute of Medical Sciences Department of Medical Oncology Dr. B. R. A. Institute Rotary Cancer Hospital New Delhi-110 029, INDIANew DelhiDELHI. Name of principal investigator: Dr Sameer Bakhshi. Site 2 : Tata Medical Center 14 Major Arterial Road (EW), Newtown Rajarhat, Kolkata 700 160KolkataWEST BENGAL. Name of principal investigator: Dr Jeevan Kumar. Site 3 : Tata Memorial…
Sr. No. 31 Ct-182-22-PPD.pdf .txt.csv	84325	CTRI/2023/05/053033 [Registered on: 22/05/2023] Trial Registered Prospectively	a phase iii, multicenter, randomized, double-blind, double-dummy study to evaluate safety and efficacy of ocrelizumab in comparison with fingolimod in children and adolescents with relapsing-remitting multiple sclerosis.	a phase iii multicenter, randomized, double-blind, double-dummy study to evaluate safety and efficacy of ocrelizumab in comparison with fingolimod in children and adolescents with relapsing-remitting multiple sclerosis	0.981982	The names of the drug are Ocrelizumab and Fingolimod.	OCRELIZUMAB	4. Place: New Delhi, Date: not mentioned.	22/05/2023	mentioned as Ocrelizumab = 300.0000 mg/10ml In House Specification, U.S.P., J.P., Ph. Eur Active for Ocrelizumab and Fingolimod 0.5 mg capsule In House Specification, NF., Ph. Eur JP for Fingolimod.	Concentrate solution for infusion for Ocrelizumab and Hard Gelatin Capsule for Fingolimod.	Ocrelizumab will be administered at a dose of 600 mg by IV infusion on Day 1 and Day 15 (half the dose, 2 weeks apart) and every 24 weeks thereafter. Route of administration is IV infusion.Ocrelizumab is a recombinant humanized monoclonal antibody based on the human immunoglobulin (Ig) G1 framework that contains heavy chain VHIII and light chain VI subgroup sequences. Ocrelizumab is produced in C…	Relapsing-Remitting Multiple Sclerosis for both Ocrelizumab and Fingolimod.	(1) ICD-10 Condition: G35||Multiple sclerosis,	mentioned in the Annexure of the document. It includes the names and addresses of the clinical trial sites, ethics committee details, ECR number beginning with 'ECR', and name of the investigator.	Site 1 : All India Institute of Medical Sciences Room no 805, 8th floor, A wing, Mother and child block, AIIMS, Ansari Nagar, New Delhi- 110029New DelhiDELHI. Name of principal investigator: Dr Sheffali Gulati. Site 2 : Amrita Institute of Medical Sciences and Research Centre AIMS Ponekkara P.O, Kochi-682041, KeralaErnakulamKERALA. Name of principal investigator: Dr Vinayan KP. Site 3 : Artemis H…
Sr. No. 40 CT-22-22-SIRO.pdf .txt.csv	69369	CTRI/2022/06/043202 [Registered on: 13/06/2022] Trial Registered Prospectively	a phase 2a, multi-center, placebo-controlled, randomized, assessor blind study of bolus 5-fluorouracil and infused leucovorin plus either infused tk-90 for parenteral use or infused tk-90 placebo administered weekly for 6 consecutive weeks to patients with colorectal cancer.	a phase 2a, multi-center, placebo-controlled, randomized, assessor blind study of bolus 5-fluorouracil and infused leucovorin plus either infused tk 90 for parenteral use or infused tk 90 placebo administered weekly for 6 consecutive weeks to patients with colorectal cancer.	0.981949	TK-90 and 2,2-Anhydrouridine.	Parenteral TK-90	4. New Delhi and the date is not specified.	13/06/2022	TK-90 (100mg.ml) = 100.0000 mg/ml In House Specification Active.	a solution for injection.	Administered as an infusion_x000D_ A) Background Medication:_x000D_ i) LV: (Hour-0) Dose of 500 mg/m2 Intravenous infusion over two hours (window period ± 30 mins)._x000D_ ii) 5-FU: (Hour-1) Dose of 500 mg/m2 Intravenous bolus (window period ± 10 mins)._x000D_ _x000D_ B) TK-90 Infusion: _x000D_ i) First Dose: (Hour-5) Dose of 45mg/kg IV over one hour (window period ± 15 mins)._x000D_ ii) Second D…	5 fluorouracil Induced mucositis.	(1) ICD-10 Condition: C189||Malignant neoplasm of colon, unspecified,	: - Sr. No. 1: Name and address of clinical trial site - Grant Medical Foundation, Ruby Hall Clinic, 40, Sassoon Road, Pune-411001, Maharashtra, India; Ethics committee details - Institutional Ethics Committee Poona Medical Research Foundation, E4-C to E4-F, 4th Floor, Fifth Avenue Condominium, Dhole Patil Road, Pune-411001, Maharashtra, India; ECR number - ECR/24/Inst/MH/2013/RR-22; Name of inve…	Site 1 : B. J. Medical College and Sassoon General Hospital 1st floor, Department of Surgery, B. J. Medical College and Sassoon General Hospital, Sassoon Road, Somwar Peth, Pune - 411001, Maharashtra, IndiaPuneMAHARASHTRA. Name of principal investigator: Dr Kiran Kumar Jadhav. Site 2 : Grant Medical Foundation Ruby Hall Clinic Department of medical Oncology 40, Sassoon Road, Pune 411001PuneMAHARA…
56-QED.pdf .txt.csv	47126	CTRI/2020/09/027897 [Registered on: 18/09/2020] Trial Registered Prospectively	a phase 2, multi-centre, open-label, single-arm trial investigating the safety, efficacy and pharmacokinetics of c21 in subjects with idiopathic pulmonary fibrosis.	a phase 2, multi-centre, open-label, single-arm trial investigating the safety, efficacy and pharmacokinetics of c21 in subjects with idiopathic pulmonary fibrosis	0.981928	Compound C21 - angiotensin II type 2 receptor (AT2R) agonist.	C21	4. of the document are Place: New Delhi, Date: not specified.	18/09/2020	given in the form of a list: Identified Specified Impurities<=0.4000 % In House Specification Individual Impurity, Single unspecified impurities<=0.3000 % In House Specification Individual Impurity, Total Related Impurities <=2.0000% In House Specification Total Impurity, Assay 95.0000 to 105.0000 %w/w In House Specification Active.	capsules.	IMP will be administered twice daily orally for 36 weeks from Visit 2 to Visit 14 as follows: _x000D_ _x000D_ _x000D_ 1. Morning dose: Two 50 mg capsules to be taken with a glass of water after minimum 2 hours fasting _x000D_ _x000D_ 2 Afternoon/evening dose: Two 50 mg capsules to be taken with a glass of water after minimum 2 hours fasting _x000D_ _x000D_ Subjects will be required not to eat any…	Idiopathic Pulmonary Fibrosis.	(1) ICD-10 Condition: J841||Other interstitial pulmonary diseases with fibrosis,	are given in the form of a numbered list: 1. Asthma Bhawan R-3, Sector-6, Vidhyadhar Nagar, Jaipur-302039, Rajasthan, India; Institutional Ethics Committee, Asthma Bhawan R-3, Sector-6, Vidhyadhar Nagar, Jaipur-302039, Rajasthan, India; ECR/750/Inst/RJ/2015/RR-18; Dr. Sharad Tikkiwal. 2. Ace Hospital & Research Center, Sr. No 32/2A, Erandawane, Gulwani Maharaj Road, Near Abhishek Hotel, Pune 4110…	Site 1 : ACE Hospital & Research Centre Room No: 104 Ground Floor Ace Hospital & Research Center, Sr. No 32/2A, Erandawane, Gulwani Maharaj Road, Near Abhishek, Pune 411004 PuneMAHARASHTRA. Name of principal investigator: Dr Himanshu Pophale. Site 2 : AMCMET Medical College and Sheth LG General Hospital Near Rambaug Fire Station, Opposite Adani Petrol Pump, Rambaug, Maninagar - 380008, Gujarat, I…
16_Cadila_Rabies.pdf .txt.csv	71838	CTRI/2022/07/044054 [Registered on: 15/07/2022] Trial Registered Prospectively	\an open-label, single-treatment, single-period, single dose, clinical phase 1 study to assess the safety and tolerability of rabies vaccine, human i.p. purified inactivated vero cell rabies vaccine-lyophilized (pvrv) of m/s. zydus lifesciences ltd. (formerly cadila healthcare ltd.), india in healthy, adult human subjects.\	an open-label, single-treatment, single-period, single dose, clinical phase 1 study to assess the safety and tolerability of rabies vaccine, human i.p. purified inactivated vero cell rabies vaccine-lyophilized (pvrv) of m/s zydus lifesciences ltd. (formerly cadila healthcare ltd.), india in healthy, adult human subjects	0.981538	Rabies Vaccine, Human I.P. [Purified Inactivated Vero Cell Rabies vaccine – Lyophilized (PVRV)]	Rabies vaccine	of the document are New Delhi and 27-JUNE-2022	15/07/2022	is , with each dose of 1 ml containing 2.5 IU of inactivated rabies virus (Pitman Moore Strain) propagated in Vero cells and inactivated by β-propiolactone, along with inactive ingredients such as human albumin, dextran, maltose, sucrose, and PBS	a liquid for IM and ID injection	Frequency:-Single dose of Vaccine _x000D_ Part 1: Intramuscular injection 1mL_x000D_ Part 2 : Intradermal injection 0.2 mL (0.1 ml in each arm)	active immunization against rabies.,	Healthy	Zydus Research Centre, Survey No. 396, 403, Opp. Sarvotam Hotel, Nr. Nova Petrochemicals, Sarkhej-Bavla N.H. N. 8A, Moraiya, Ahmedabad Gujarat - 382213. The ethics committee details are Sangini Hospital Santorini Square, B/H Abhishree Complex Opp. Star Bazar Nr Jodhpur Cross Roads Satellite Ahmedabad Gujarat - 380015 India [EC Reg no. ECR/147/Inst/GJ/2013/RR-19]. The name of the principal investi…	Site 1 : Zydus Research Centre Survey No. 396/403, Opp. Sarvotam Hotel, Nr. Nova Petrochemicals, Sarkhej-Bavla N.H. No. 8A, Village: Moraiya, Ahmedabad-382213, Gujarat, IndiaAhmadabadGUJARAT. Name of principal investigator: Dr Gaurav Jansari
60Novo Nordisk.pdf .txt.csv	46476	CTRI/2020/09/027971 [Registered on: 22/09/2020] Trial Registered Prospectively	efficacy and safety of oral semaglutide versus placebo both in combination with metformin and/or basal insulin in children and adolescents with type 2 diabetes.	efficacy and safety of oral semaglutide versus placebo both in combination with metformin and/or basal insulin in children and adolescents with type 2 diabetes	0.981481	Semaglutide.	Semaglutide	4. Place: New Delhi, Date: Not mentioned.	22/09/2020	Active: Semaglutide =3.0000 milligram(mg) In House Specification Active, Semaglutide =7.0000 milligram(mg) In House Specification Active, Semaglutide =14.0000 milligram(mg) In House Specification Active. Inactive: Povidone K 90 =8.0000 milligram(mg) U.S.P.,E.P.,J.P. Inactive, Cellulose, microcrystalline=80.0000 milligram (mg)U.S.P.,E.P.,J.P. Inactive, Magnesium stearate =9.7000 milligram (mg) U.S…	Tablets.	3mg, 7mg and 14mg_x000D_ Once a day (OD)_x000D_ Oral. Duration of treatment is 52 weeks.	Intended therapeutic indication for oral semaglutide is improvement of glycaemic control in adults with T2D as adjunct to diet and exercise.	(1) ICD-10 Condition: E119||Type 2 diabetes mellitus without complications,	1. Endolife Speciality Hospital Pvt. Ltd., Dr-No: 94, Old Club Road, Kothapet, Guntur-522001, Andhra Pradesh. Ethics committee details: Institutional Ethics Committee Endolife Speciality Hospital, Endolife Speciality Hospitals Pvt. Ltd., Dr-No: 94, Old Club Road, Kothapet, Guntur-522001, Andhra Pradesh, India. ECR/647/Inst/AP/2014/RR-17. Name of Investigator: Dr. Srikanth Kongara. 2. P.D. Hinduja…	Site 1 : All India Institute of Medical Sciences (AIIMS) Room no 303, Biotechnology block,Dept of EndocrinologyNew DelhiDELHI. Name of principal investigator: Dr Rajesh Khadgawat. Site 2 : Endolife Speciality hospitals Room of Dr. K. Srikanth (Sr. Consultant), Ground Floor, Endolife Speciality hospitals, Old club road KothapetGunturANDHRA PRADESH. Name of principal investigator: Dr Kongara Srikan…
23 Ct-104-20-AstraZeneca.pdf .txt.csv	54566	CTRI/2021/04/032961 [Registered on: 20/04/2021] Trial Registered Prospectively	a phase iii, randomised, controlled, multi-centre, 3-arm study of neoadjuvant osimertinib as monotherapy or in combination with chemotherapy versus standard of care chemotherapy alone for the treatment of patients with epidermal growth factor receptor mutation positive, resectable non-small cell lung cancer (neoadaura).	a phase iii, randomised, controlled, multi-centre, 3-arm study of neoadjuvant osimertinib as monotherapy or in combination with chemotherapy versus standard of care chemotherapy alone for the treatment of patients with epidermal growth factor receptor mutation positive, resectable non-small cell lung cancer neoadaura	0.981424	Osimertinib.	Osimertinib (TAGRISSO™) monotherapy	4. New Delhi, and the date is not specified in the prompt.	20/04/2021	Osimertinib = 40.0000 milligram (mg) In House Specification Active, Osimertinib = 80.0000 milligram (mg) In House Specification Active.	tablets.	Route of administration - Oral	the treatment of patients with Epidermal Growth Factor Receptor Mutation Positive, Resectable Non-small Cell Lung Cancer.	(1) ICD-10 Condition: C349||Malignant neoplasm of unspecifiedpart of bronchus or lung,	- Tata Medical Centre, 14-MAR (EW), New Town, Rajarhat, Kolkata - 700160, West Bengal, India Ethics committee details: Institutional Review Board, Tata Medical Center, 14-MAR (EW), New Town, Rajarhat, Kolkata - 700160, West Bengal, India ECR number: ECR/269/Inst/WB/2013/RR-19 Name of investigator: Dr. Bivas Biswas - Department of Medical Oncology, H Block extension VMMC & Safdarjung Hospital, New…	Site 1 : All India Institute of Medical Sciences, AIIMS Associate Professor - Department of Medical Oncology Dr. B. R. Ambedkar Institute of Rotary Cancer Hospital, Department of Medical Oncology, Ansari Nagar, PIN-110029 New DelhiDELHI. Name of principal investigator: Dr Prabhat Singh Malik. Site 2 : Kasturba Medical College and Hospital Medical Oncologist Department of Medical Oncology, Madhav …
Sr. No. 103 CT-88-21-Bayer.pdf .txt.csv	62410	CTRI/2021/11/037917 [Registered on: 10/11/2021] Trial Registered Prospectively	\a randomized, double-blind, placebo-controlled, parallel-group, multicenter phase 3 study to investigate the efficacy and safety of finerenone, in addition to standard of care, on the progression of kidney disease in patients with non-diabetic chronic kidney disease\. ,	a randomized, double-blind, placebo-controlled, parallel-group, multicenter phase 3 study to investigate the efficacy and safety of finerenone, in addition to standard of care, on the progression of kidney disease in patients with non-diabetic chronic kidney disease	0.981413	Finerenone and BAY 94-8862. ,	Finerenone (BAY94-8862)	New Delhi and the date is not specified in the prompt. ,	10/11/2021	is BAY 94-8862 micronized/Finerenone = 10.0000 milligram (mg) In House Specification Active and BAY 94-8862 micronized/Finerenone = 20.0000 milligram (mg) In House Specification Active. ,	tablets. ,	10 mg or 20 mg tablets once daily orally for 32 months.	to evaluate the efficacy and safety of Finerenone, in addition to standard of care, on the progression of kidney disease in patients with Non-Diabetic Chronic Kidney Disease. ,	(1) ICD-10 Condition: N183||Chronic kidney disease, stage 3 (moderate),	as follows: ", "1. Noble Hospital Pvt. Ltd., 153 A, Magarpatta City, Road, Pune - 411013, Maharashtra, India. Ethics committee details: Noble Hospital Institutional Ethics Committee, Room No. 5 Noble Hospital Clinical Research Department, Noble Annex, Noble Hospital Pvt. Ltd., 153 A, Magarpatta City, Road, Pune-411013, Maharashtra, India. ECR/259/Inst/MH/2013/RR-19. Name of the investigator: Dr. …	Site 1 : All India Institute of Medical Sciences, Department of Nephrology, 5th Floor, Ansari Nagar, New Delhi - 110029NorthDELHI. Name of principal investigator: Dr Sanjay Kumar Agarwal. Site 2 : Government Medical College Trivandrum Research Room Ground Floor Department of Nephrology Super Speciality Block UlloorThiruvananthapuramKERALA. Name of principal investigator: Dr Noble Gracious. Site 3…
77.pdf .txt.csv	68559	CTRI/2022/05/042409 [Registered on: 09/05/2022] Trial Registered Prospectively	\an open label, balanced, randomized, single-dose, single-period, two-treatment, parallel comparative pharmacokinetics study of lupin’s test product (t1) pegfilgrastim on body injector 6 mg/0.6 ml with lupin’s test product (t2) pegfilgrastim prefilled syringe injection 6 mg/0.6 ml in healthy, adult, human subjects\.,	an open label, balanced, randomized, single-dose, single-period, two-treatment, parallel comparative pharmacokinetics study of lupin’s test product (t1) pegfilgrastim on body injector 6 mg/0.6 ml with lupin’s test product (t2) pegfilgrastim prefilled syringe injection 6 mg/0.6 ml in healthy, adult, human subjects.	0.981191	Pegfilgrastim 6 mg/0.6 mL.,	Pegfilgrastim prefilled syringe injection 6 mg/0.6 mL	4. New Delhi, 04-Apr-2022.,	09/05/2022	:\n- Active ingredient: Pegfilgrastim (In-house) 6 mg\n- Inactive ingredients: Sorbitol, Glacial acetic acid, Sodium acetate trihydrate, Polysorbate 20, Water for injection.,	subcutaneous injection by using the On Body Injector (OBI).,	Dose:6 mg (6mg/0.6 mLpegfilgrastim solution) subcutaneouslyfrom the single-use_x000D_ pre-filled syringe.	to decrease the incidence of infection, as manifested by febrile neutropenia, in patients with nonmyeloid malignancies receiving myelosuppressive anti-cancer drugs associated with a clinically significant incidence of febrile neutropenia.,	Healthy, Adult, Human_x000D_ Subjects	" :\n- Name and Address of Clinical Trial Site: Accutest Research Laboratories (I) Pvt. Ltd., 1st & 2nd Floor, Synergy Square Complex, Krishna Industrial Estate, BIDC, Gorwa, Vadodara - 390016, India.\n- Ethics Committee Details: Raneshwar Multispeciality Hospital IRB, Raneshwar Multispeciality Hospital, A-4 Parshaw Nagar Society, Before Vasna Jakat naka, Vadodara, Gujarat –390015, India, ECR/2/I…	Site 1 : Accutest Research Laboratories (I) Pvt. Ltd 1st & 2nd Floor, Synergy Square Complex, Krishna Industrial Estate, BIDC, Gorwa, Vadodara – 390016, India VadodaraGUJARAT. Name of principal investigator: Dr Pratikkumar Asari
Sr. No. 53 Ms. Pharm-Olam-CTNOC.pdf .txt.csv	66152	CTRI/2022/09/045510 [Registered on: 14/09/2022] Trial Registered Prospectively	a randomized, controlled, multicenter study to evaluate the safety and efficacy of paltusotine in subjects with non-pharmacologically treated acromegaly.	a randomized, controlled, multicenter study to evaluate the safety and efficacy of paltusotine in subjects with non-pharmacologically treated acromegaly	0.980645	Paltusotine.	Paltusotine	4. of the document are Place: New Delhi, Date: not mentioned.	14/09/2022	Paltusotine = 20.0000 milligram (mg) In House Specification Active. No information about inactive ingredients is provided.	tablets.	Paltusotine, tablets, once daily by mouth for 24 weeks_x000D_ Other Name: CRN00808	Acromegaly.	(1) ICD-10 Condition: E35||Disorders of endocrine glands in diseases classified elsewhere,	provided in an annexure. The names and addresses of the clinical trial sites are: 1. SMO, Second Floor KLES Dr. Prabhakar Kore Hospital & Medical Research Centre, Nehru Nagar, Belgavi-590010, Karnataka, India 2. All India Institute of Medical Sciences Ansari Nagar, New Delhi - 110029 3. Department of Endocrinology & Diabetes, Amrita Institute of Medical Sciences & Research Centre, AlMs-Ponekkara.…	Site 1 : All India Institute of Medical Sciences Dept of Endocrinology and Metabolism AIIMS Ansari Nagar New Delhi 110029New DelhiDELHI. Name of principal investigator: Dr Rajesh Khadgawat. Site 2 : Amrita Institute of Medical Sciences & Research Centre Department of Endocrinology and Diabetes AIMS Ponekkara P.O. Kochi 682041ErnakulamKERALA. Name of principal investigator: Praveen Valliyaparambil…
CT-12-2020.pdf .txt.csv	44660	CTRI/2020/06/026086 [Registered on: 23/06/2020] Trial Registered Prospectively	a prospective, randomized, two-arm, parallel, single-blind, active-controlled, multicentre, noninferiority clinical study to evaluate the immunogenicity and safety of diphtheria and tetanus vaccine (adsorbed) for adults and adolescents i.p. of m/s cadila healthcare limited compared to diphtheria and tetanus vaccine (adsorbed) for adults and adolescents i.p. of m/s biological e. limited in healthy…	a prospective, randomized, two-arm, parallel, single-blind, active-controlled, multicentre, non-inferiority clinical study to evaluate the immunogenicity and safety of diphtheria and tetanus vaccine (adsorbed) for adults and adolescents i.p. of m/s. cadila healthcare limited compared to diphtheria and tetanus vaccine (adsorbed) for adults and adolescents i.p. of m/s. biological e limited in healt…	0.980535	Diphtheria and Tetanus Vaccine (Adsorbed) for Adults and Adolescents I.P.	Diphtheria and Tetanus vaccine (adsorbed) for adults and adolescents_x000D_ I.P. of M/s. Cadila Healthcare Ltd.	4. of the document are New Delhi on 10-JUN-2020.	23/06/2020	Diphtheria Toxoid and Tetanus Toxoid as active ingredients, and Aluminium [Al3+] as AlPO4 gel and 2-Phenoxy Ethanol as inactive ingredients.	a liquid.	Subjects will receive single dose (0.5 ml) of the vaccine. The vaccine will be administered as intramuscular (IM) injection in the upper arm taking aseptic precautions	for active immunization of children, adolescents, and adults from 10 to 60 years of age.	Active immunization against Diphtheria and_x000D_ Tetanus	Details of clinical trial sites: 1. Department of Pediatrics, Niloufer Hospital (Affiliated to Osmania Medical College), Red Hills, Baazar Ghat, Lakdikapool, Hyderabad-500004, Telangana, Institutional Ethics Committee, Osmania Medical College, Koti, Hyderabad – 500095, Telangana, ECR/300/Inst/AP/2013/RR-19, Dr. N. Ravi Kumar 2. Pt. B. D. Sharma Post Graduate Institute of Medical Sciences, Rohtak-…	Site 1 : Government Medical College & Hospital, Nagpur Department of Medicine, Government Medical College & Hospital, Medical College Square, Hanuman Nagar, Nagpur-440003, MaharashtraNagpurMAHARASHTRA. Name of principal investigator: Dr Rashmi Nagdeve. Site 2 : Institute of Medical Sciences (IMS) & SUM Hospital, Bhubaneshwar Department of Community Medicine, Institute of Medical Sciences (IMS) & …
Sr. No. 45 Ct-19-20-PPD.pdf .txt.csv	42740	CTRI/2020/10/028718 [Registered on: 29/10/2020] Trial Registered Prospectively	a multicenter, double-blind, randomized, placebo-controlled trial with an open-label extension phase of perampanel as adjunctive treatment in subjects at least 2 years of age with inadequately controlled seizures associated with lennox-gastaut syndrome.	a multicenter, double-blind, randomized, placebo-controlled trial with an open-label extension phase of perampanel as adjunctive treatment in subjects at least 2 years of age with inadequately controlled seizures associated with lennox-gastaut syndrome	0.980392	Perampanel.	Perampanel	4. The place of the document is New Delhi and the date is not specified.	29/10/2020	Perampanel = 2.0000 milligram (mg) Manufacturer Specification Active, Perampanel = 0.5000 mg/ml Manufacturer Specification Active.	tablets and oral suspension.	Single daily dose administration of perampanel given as multiple oral 2-mg tablets to give a dose of 2 mg/day to 8 mg/day (randomization phase) or up to 12 mg/day (Extension A and Extension B, except in Japan where the maximum dose remains as 8 mg/day).	inadequately controlled seizures associated with Lennox-Gastaut Syndrome.	(1) ICD-10 Condition: G408||Other epilepsy and recurrent seizures,	1. Jaslok Hospital & Research Centre, Peddar Road, Mumbai-400026 Ethics committee details: Ethics Committee, Jaslok Hospital & Research Centre, Peddar Road, Mumbai-400026 ECR number: ECR/294/lnst/MH/2013/RR-19 Name of investigator: Dr. Anaita Udwadia 2. Amrita Institute of Medical Sciences and Research Centre, AIMS Ponekkara P.O, Kochi- 682041 Ethics committee details: Institutional Ethics Commit…	Site 1 : Amrita Institute of Medical Sciences and Research Centre (AIMS) Division of Pediatric Neurology, Department of Neurology, Amrita Institute of Medical Sciences and Research Centre (AIMS), Ponekkara P.O, Kochi- 682 041ErnakulamKERALA. Name of principal investigator: Dr Vinayan Puthenveettil. Site 2 : Bharti Hospital, affiliated to Bharti Vidyapeeth Deemed to be University Medical College, …
Sr. No. 20 CT-02-22-Sanofi-CTNOC & TL.pdf .txt.csv	43746	CTRI/2020/07/026641 [Registered on: 17/07/2020] Trial Registered Prospectively	: \atlas-peds: an open-label, multinational study of fitusiran prophylaxis in male pediatric subjects aged 1 to less than 12 years with hemophilia a or b\.,	atlas-peds: an open-label, multinational study of fitusiran prophylaxis in male pediatric subjects aged 1 to less than 12 years with hemophilia a or b	0.980392	: Fitusiran [equivalent to fitusiran sodium].,	Fitusiran	4. : New Delhi, date not specified.,	17/07/2020	: Fitusiran [equivalent to fitusiran sodium] = 80.0000 milligram (mg). The specification is \In House Specification Active\.,	: Vials/Pre Filled Syringes.,	Fitusiran solution for injection in Phosphate buffered saline (Subcutaneous use) supplied as a sterile solution. Dosages administered as per the weight of the participants	: For the treatment of hemophilia A or hemophilia B.,	(1) ICD-10 Condition: D66||Hereditary factor VIII deficiency,	" :", "- Sahyadri Super Specialty Hospital, Plot No. 30C, Erandwane, Karve Road, Pune - 411004, Maharashtra, India. Ethics committee details: ECR/493/Inst/MH/2013/RR-19. Name of investigator: Dr. Shashikant Janardan Apte.", "- K J Somaiya Hospital and Research Centre, Sathgen Lab, Somaiya Ayurvihar Complex, Eastern Express Highway, Sion East, Mumbai-400022, Maharashtra, India. Ethics committee de…	Site 1 : Christian Medical College Department of Haematology, Room No. 2, First Floor, Ida Scudder Road, Vellore 632004, Tamil Nadu, IndiaVelloreTAMIL NADU. Name of principal investigator: Dr Alok Srivastava. Site 2 : K. J. Somaiya Hospital and Research Centre Clinical Trial and Research Unit (CTRU) Sathgen Lab, College building, 02nd floor Somaiya Ayurvihar, Eastern Express Highway, Sion East, M…
Sr. No. 42 CT-29-20-Sanofi.pdf .txt.csv	43746	CTRI/2020/07/026641 [Registered on: 17/07/2020] Trial Registered Prospectively	atlas-peds: an open-label, multinational study of fitusiran prophylaxis in male pediatric subjects aged 1 to less than 12 years with hemophilia a or b.	atlas-peds: an open-label, multinational study of fitusiran prophylaxis in male pediatric subjects aged 1 to less than 12 years with hemophilia a or b	0.980392	Fitusiran.	Fitusiran	4. Place: New Delhi, Date: not explicitly stated in the prompt.	17/07/2020	Fitusiran =100.0000 mg/ml In House Specification Active.	Vials in Pre filled syringe.	Fitusiran solution for injection in Phosphate buffered saline (Subcutaneous use) supplied as a sterile solution. Dosages administered as per the weight of the participants	For the treatment of hemophilia A or hemophilia B.	(1) ICD-10 Condition: D66||Hereditary factor VIII deficiency,	Details of clinical trial sites: - Sahyadri Super Specialty Hospital, Plot No. 30C, Erandwane, Karve Road, Pune - 411004, Maharashtra, India. Ethics committee details: Institutional Ethics Committee Sahydari Clinical Research & Development Centre, A unit of Sahyadri Hospitals Limited, 33/34B, Makarand Bhave Path, Erandawane, Pune - 411004, Maharashtra, India. ECR/493/Inst/MH/2013/RR-19. Name of i…	Site 1 : Christian Medical College Department of Haematology, Room No. 2, First Floor, Ida Scudder Road, Vellore 632004, Tamil Nadu, IndiaVelloreTAMIL NADU. Name of principal investigator: Dr Alok Srivastava. Site 2 : K. J. Somaiya Hospital and Research Centre Clinical Trial and Research Unit (CTRU) Sathgen Lab, College building, 02nd floor Somaiya Ayurvihar, Eastern Express Highway, Sion East, M…
Sr. No. 20 Ct-132-22 Ms. GSK.pdf .txt.csv	77903	CTRI/2023/03/051029 [Registered on: 23/03/2023] Trial Registered Prospectively	\17β-hydroxysteroid dehydrogenase type 13 minimization for the treatment of nash (horizon): a double-blind, placebo-controlled phase 2b study to evaluate the efficacy and safety of gsk4532990 in adults with pre-cirrhotic non-alcoholic steatohepatitis\.,	17 b-hydroxysteroid dehydrogenase type 13 minimization for the treatment of nash (horizon): a double-blind, placebo controlled phase 2b study to evaluate the efficacy and safety of gsk4532990 in adults with pre-cirrhotic non-alcoholic steatohepatitis.	0.980159	GSK4532990 Solution for injection, 200 mg/ml.,	Drug: GSK4532990	4. New Delhi and the date is not explicitly stated in the prompt.,	23/03/2023	Water for Injection, Sodium phosphate dibasic, anhydrous, Sodium phosphate monobasic, monohydrate, and GSK4532990A. Water for Injection, Sodium phosphate dibasic, anhydrous, and Sodium phosphate monobasic, monohydrate are inactive ingredients, while GSK4532990A is an active ingredient.,	a solution for injection.,	100mg Arm_x000D_ Dose: 1.5ml (0.5ml GSK4532990 + 1ml 0.9% NS)_x000D_ Frequency: Every 4 weeks_x000D_ Route of Administration: Subcutaneous _x000D_ Total Duration: 52 weeks_x000D_ _x000D_ _x000D_ 200mg Arm_x000D_ Dose: 1.5ml (1ml GSK4532990 + 0.5ml 0.9% NS)_x000D_ Frequency: Every 12 weeks_x000D_ Route of Administration: Subcutaneous _x000D_ Total Duration: 52 weeks	the treatment of Non-alcoholic steatohepatitis.,	(1) ICD-10 Condition: K759||Inflammatory liver disease, unspecified,	" The details of the clinical trial sites include the names and addresses, the ethics committee details, ECR number beginning with 'ECR', and name of the investigator. The details are listed in the Annexure section of the document." )	Site 1 : All India Institute of Medical Sciences Sijua Patrapada Bhubaneswar 751019KhordhaORISSA. Name of principal investigator: Dr Manas Kumar Panigrahi. Site 2 : Institute of Digestive and Liver Diseases Dispur Hospitals Pvt Ltd Ganeshguri Guwahati 781006KamrupASSAM. Name of principal investigator: Dr Bhabadev Goswami. Site 3 : Institute of Liver and Biliary Sciences D1 Vasant Kunj New Delhi 1…
81CT-76-20-Medpace.pdf .txt.csv	48068	CTRI/2020/12/029838 [Registered on: 16/12/2020] Trial Registered Prospectively	randomized, open-label, cross-over, phase 3 study to evaluate the efficacy and safety of lib003 with evolocumab in homozygous familial hypercholesterolemia patients on stable lipid-lowering therapy.	randomized, open-label, cross-over, phase 3 study to evaluate the efficacy and safety of lib003 with evolocumab in homozygous familial hypercholesterolemia patients on stable lipid-lowering therapy	0.98	LIB003.	LIB003	4. New Delhi, and the date is not specified in the prompt.	16/12/2020	LIB003 =250.0000 mg/ml U.S.P Active.	a sterile solution for injection.	300 mg SC Q4W ,PCSK9 inhibitor. It will be administered Q4W (every 4 weeks) as SC (subcutaneous) injections_x000D_ 48 weeks active treatment duration	low-density lipoprotein cholesterol (LDL-C) reduction in patients with homozygous familial hypercholesterolemia (HoFH) who need additional LDL-C reduction.	(1) ICD-10 Condition: E780||Pure hypercholesterolemia,	: - G. B. Pant Institute of Postgraduate Medical Education and Research, Room No. 133, 1St Floor, Academic Block, Department of Cardiology, Jawahar Lal Nehru Marg, New Delhi-110002, India - Institutional Ethics Committee, Room No-306-A, Maulana Azad Medical College, New Delhi -110002, India - ECR/329/Inst/DL/2013/RR-19 - Name of the investigator: Dr. Vimal Mehta.	Site 1 : Care Institute of Medical Sciences Near. Shukan Mall, Off. Science City Road, Sola -38060AhmadabadGUJARAT. Name of principal investigator: Dr Milan Chinubhai Chag. Site 2 : G .B. Pant Institute of Postgraduate Medical Education & Research, Room No.-133, 1st Floor, Academic Block,Department of Cardiology, Jawahar Lal Nehru Marg,New Delhi-110002, IndiaNew DelhiDELHI. Name of principal inve…
99 CT-106-20 J&J.pdf .txt.csv	52309	CTRI/2021/03/032147 [Registered on: 19/03/2021] Trial Registered Prospectively	a multicenter, single-arm, open-label, long-term follow-up safety study of selexipag in participants who participated in a previous selexipag study.	a multicenter, single-arm, open-label, long-term follow-up safety study of selexipag in participants who participated in a previous selexipag study	0.98	Selexipag.	Selexipag	4. New Delhi, but the specific date is not given.	19/03/2021	Selexipag in various amounts (200.0000 mcg, 400.0000 mcg, 600.0000 mcg, 800.0000 mcg, 1000.0000 mcg, 1200.0000 mcg, 1400.0000 mcg, and 1600.0000 mcg) as the active ingredient.	tablets.	Selexipag tablets will be administered orally at all dose strengths (200, 400, 600, 800, 1000, 1200, 1400 and 1600 microgram) twice daily for 5 years.	Pulmonary Arterial Hypertension (PAH).	(1) ICD-10 Condition: I270||Primary pulmonary hypertension,	: - Apollo Hospitals, No.21, Greams Lane, Off Greams Road, Chennai-600006, Tamil Nadu, India. Ethics committee details: Institutional Ethics Committee-Clinical Studies, Apollo Hospitals Enterprise Limited, #21, Greams Lane, Off Greams Road, Thousand Lights, Chennai-600006 Tamil Nadu, India. ECR/37/Inst/TN/2013/RR-19. Investigator: Dr. Abraham Oomman. - Sanjivani Super Speciality Hospital Pvt Ltd …	Site 1 : Apollo hospitals Department of Cardiology, Room No.9, Ground Floor, 21- Greams lane, Off Greams Road, Chennai – 600006 ChennaiTAMIL NADU. Name of principal investigator: Dr Abraham Oomman. Site 2 : Sanjivani superspeciality hospital pvt ltd. Research Department, Ground floor, 1, Uday Park society, Near sunrise park, Vastrapur-380015AhmadabadGUJARAT. Name of principal investigator: Dr Kam…
Sr. No. 131 Ct-103-21-AstraZenevca.pdf .txt.csv	64665	CTRI/2022/02/040116 [Registered on: 08/02/2022] Trial Registered Prospectively	\an open-label, randomized, multicenter, phase 3 study to assess the efficacy and safety of trastuzumab deruxtecan as first-line treatment of unresectable, locally advanced, or metastatic nsclc harboring her2 exon 19 or 20 mutations (destiny-lung04)\. ,	an open-label, randomized, multicenter, phase 3 study to assess the efficacy and safety of trastuzumab deruxtecan as first-line treatment of unresectable, locally advanced, or metastatic nsclc harboring her2 exon 19 or 20 mutations (destiny-lung04)	0.98	The name of the drug is Trastuzumab Deruxtecan. ,	Trastuzumab Deruxtecan (T-DXd)	of the document are New Delhi and it does not specify the date. ,	08/02/2022	is Trastuzumab Deruxtecan = 100.0000 milligram (mg) In House Specification Active. ,	powder for concentrate for solution for infusion. ,	Trastuzumab Deruxtecan ((T-DXd) monotherapy by IV administration Q3W until RECIST 1.1 defined progression by investigator	first-line treatment of unresectable, locally advanced, or metastatic NSCLC harboring HER2 Exon 19 or 20 mutations. ,	(1) ICD-10 Condition: C349||Malignant neoplasm of unspecifiedpart of bronchus or lung,	provided in an annexure. The names and addresses of the clinical trial sites are Healthcare Global Enterprises Ltd, HCG Tower # 8, P. Kalinga Rao Road, Sampangi Ram Nagar, Bangalore 560027; Tata Memorial Centre, Department of Medical Oncology, Dr. Ernest Borges Marg, Parel, Mumbai-400012; AIG Hospitals, No: 136, Plot No 2/3/4/5 Survey, 1, Mindspace Rd, Gachibowli, Hyderabad, Telangana 500032, Ind…	Site 1 : Asian Institute of Gastroenterology Hospitals Department of Medical Oncology, Plot No. 2/3/4/5 Survery 1. Mindspace Road, Gachibowli PIN 500032, India HyderabadTELANGANA. Name of principal investigator: Dr Vamshi Krishna Muddu. Site 2 : HCG Manavata Cancer Centre Department of Medical Oncology, Behind Shivang Auto, Mumbai Naka, PIN 422002, India MumbaiMAHARASHTRA. Name of principal inves…
CT-21-2020.pdf .txt.csv	48578	CTRI/2020/11/028779 [Registered on: 02/11/2020] Trial Registered Prospectively	a phase i, open label, parallel, randomized trial to assess the safety and efficacy of sars-cov-2 equine antiserum immunoglobulin (purified f(ab')2 fragment) in hospitalized covid-19 patients with moderate disease in addition to standard of care.	a phase i, open label, parallel, randomised trial to assess the safety and efficacy of sars-cov-2 equine antiserum immunoglobulin (purified f(ab)2 fragment) in hospitalised covid-19 patients with moderate disease in addition to standard of care.	0.979839	SARS-CoV-2 Equine Antiserum Immunoglobulin (Purified F(ab')2 fragment).	SARS-CoV-2 (COVID-19) Antiserum_x000D_ Immunoglobulins (Purified F(ab)2 fragment along with standard of_x000D_ care	4. of the document are New Delhi on 16.10.2020.	02/11/2020	: - Active ingredient: SARS-CoV-2 virus neutralization titer NLT 10000 / mL as measured by PRNT 90 assay - Inactive ingredients: Glycine 22.5mg, Sodium Chloride 0.7mg, Water for injection q.s to 1.0 ml	a solution for injection.	Patients in this group will receive two 4mL_x000D_ doses (at day 0 and Day 1) of BioE’s SARS-CoV-2 (COVID-19) Antiserum Immunoglobulins_x000D_ (Purified F(ab)2 fragment) intravenously along with standard of care.	to treat patients with COVID-19 disease.	(1) ICD-10 Condition: B972||Coronavirus as the cause of diseases classified elsewhere,	: - Clinical Trial Site 1: All India Institute of Medical Sciences, Patna, Phulwarisharif, Bihar -801507 India; Ethics Committee details: Institutional Ethics Committee, All India Institute of Medical Sciences, Patna, Phulwarisharif, Bihar -801507 India; ECR number: ECR/1387/Inst/BR/2020; Name of Principal Investigator: Dr. Chandramani Singh - Clinical Trial Site 2: Visakha Institute of Medical S…	Site 1 : All India Institute of Medical Sciences 1st Floor, Room No. 17, Department of Community & Family Medicine, Aurangabad Road,Phulwari Sharif- 801507PatnaBIHAR. Name of principal investigator: Dr Chandramani Singh. Site 2 : Visakha Institute of Medical Sciences(VIMS) 2nd Floor, Room No. 03, S.No.97/2, Dept of Medicine, Hanumanthuwaka, Chinagadilli Village-530040VisakhapatnamANDHRA PRADESH. …
85 Ct-90-20-IQVIA-CTNOC.pdf .txt.csv	48797	CTRI/2020/10/028602 [Registered on: 23/10/2020] Trial Registered Prospectively	a multicentre, phase 2, randomised study to assess the efficacy and safety of bemcentinib for the treatment of covid-19 in hospitalised patients.	a multicentre, phase 2, randomised study to assess the efficacy and safety of bemcentinib for the treatment of covid-19 in hospitalised patients	0.979592	Bemcentinib (BGB324).	Bemcentinib (BGB324) 100mg Oral	4. The place of the document is New Delhi and the date is not mentioned.	23/10/2020	Bemcentinib, free base = 100.0000 milligram (mg) In House Specification Active.	Capsules.	1)400mg of will be given on Day 1 through Day 3 _x000D_ 2)200mg of will be given on Day 4 through Day 15	for the Treatment of COVID-19 in Hospitalised Patients.	, (1) ICD-10 Condition: B972||Coronavirus as the cause of diseases classified elsewhere,	: 1. Kasturba Medical College Hospital (a constituent institution of MAHE, Manipal), Attavar, Mangaluru-575001, Karnataka, India, Ethics committee details: Manipal Academy of Higher Education (MAHE) Ethics Committee, ECR/541/Ins/t/KA/2014/RR-20, Name of investigator: Dr. John Thomas Ramapuram. 2. Sahyadri Super Specialty Hospital, 30C, Erandwane, Karve Road, Pune -411004, Maharashtra, India, Ethi…	Site 1 : Chopda Medicare & Research Centre Pvt Ltd Dept of Cardiology, Ground Floor,NA – OPD ,Magnum Heart Institute, 3/5, Patil Lane No, Laxmi Nagar, Near K.B.H Vidyalaya, Canada Corner, Nashik – 422005, MaharashtraNashikMAHARASHTRA. Name of principal investigator: Dr Manojkumar Chopada. Site 2 : JSS Hospital Dept of Geriatric , 1st Floor, 1002, MG Road, Mysuru – 570004, KarnatakaMysoreKARNATAKA…
80CT-79-20-Johnson & Johnson.pdf .txt.csv	48922	CTRI/2020/11/029081 [Registered on: 12/11/2020] Trial Registered Prospectively	a randomized, open-label phase 3 study of combination amivantamab and carboplatin - pemetrexed therapy, compared with carboplatin-pemetrexed, in patients with egfr exon 20ins mutated locally advanced or metastatic non-small cell lung cancer.	a randomized, open-label phase 3 study of combination amivantamab and carboplatin-pemetrexed therapy, compared with carboplatin-pemetrexed, in patients with egfr exon 20ins mutated locally advanced or metastatic non-small cell lung cancer	0.979424	Amivantamab.	Amivantamab	4. of the document are New Delhi and the date is not mentioned.	12/11/2020	Amivantamab = 50.0000 mg/ml U.S.P.,E.P. Active.	Monoclonal Antibody.	Amivantamab will be administered as an IV infusion once weekly up to Cycle 2 Day 1 and then 1 on Day 1 of each 21-day cycle starting with Cycle 3	EGFR Exon 20ins Mutated Locally Advanced or Metastatic Non-Small Cell Lung Cancer.	(1) ICD-10 Condition: C349||Malignant neoplasm of unspecifiedpart of bronchus or lung,	- Tata Memorial Hospital, Dr. Ernest Borges Marg, Parel, Mumbai-4000- Ethics committee details: Institutional Ethics Committee Clinical Research Secretariat, 3rd Floor Main Building Tata Memorial Hospital Parel, Mumbai-4000 ECR/170/Inst/MH/2013/RR-19, Name of the investigator: Dr. Vijay Patil - Basavatarakam Indo American cancer Hospital and Research Institute, Road No. 10, Banjara Hills, Hyderab…	Site 1 : Basavatarakam Indo American Centre Hospital and Research Institute Road No 14, Banjara Hills, Hyderabad, Telangana, 500034, IndiaHyderabadTELANGANA. Name of principal investigator: Dr M V T Krishna Mohan. Site 2 : HCG Manavata Cancer Center Behind Shivang Auto,Mumbai Naka, Nasik, Maharashtra, 422002, IndiaNashikMAHARASHTRA. Name of principal investigator: Dr Rajnish Nagarkar. Site 3 : No…
13_Techinvention.pdf .txt.csv	56305	CTRI/2021/08/035344 [Registered on: 02/08/2021] Trial Registered Prospectively	a phase iii, open label, multicenter, parallel group, randomized clinical study to compare the immunogenicity and safety of euvichol-plus vaccine with oral cholera vaccine shancholtm in healthy adults and children above age of one year.	a phase iii, open label, multicenter, parallel group, randomized clinical study to compare the immunogenicity and safety of euvichol-plus vaccine with oral cholera vaccine shanchol in healthy adults and children above age of one year	0.978992	Oral Cholera Vaccine (Inactivated).	Euvichol-Plus vaccine	4. New Delhi, 20-MAY-2021.	02/08/2021	active ingredients V. cholerae O1 Inaba Cairo 48 classical biotype, Heat inactivated (300 L.E.U*), V. cholerae O1 Inaba Phil 6973 El Tor biotype, Formalin inactivated (600 L.E.U*), V. cholerae O1 Ogawa Cairo 50 classical biotype, Formalin inactivated (300 L.E.U*), V. cholerae O1 Ogawa Cairo 50 classical biotype, Heat inactivated (300 L.E.U*), and V. cholerae O139 4260B, Formalin inactivated (600 …	a liquid suspension for route of administration.	Euvichol-Plus vaccine is a bivalent (O1 and O139) inactivated whole cell Oral Cholera Vaccine (OCV) containing killed whole cells of Vibrio cholerae O1 and Vibrio cholerae O139. A two-dose regimen of this vaccine was shown to be well-tolerated and immunogenic against Vibrio cholerae.	for prevention of cholera caused by Vibrio Cholerae.	Prevention of Cholera caused by Vibrio cholerae	provided in a numbered list, including the names and addresses, ethics committee details, ECR number beginning with 'ECR', and name of the investigator. The sites are: 1. All India Institute of Medical Sciences, Old OT Block, Room No. 102, AIIMS Hospital Ansari Nagar, New Delhi-110029, India. Ethics Committee: Institute Ethics Committee, All India Institute of Medical Sciences Old OT Block, Room …	Site 1 : Aartham Multi Super Specialty Hospital, Opp. Polytechnic, NR. Panjarapole cross road, Ambawadi, Ahmedabad AhmadabadGUJARAT. Name of principal investigator: Dr Jinen Mukeshbhai Shah. Site 2 : Aatman Hospital 5, Anveshan Row House, Opp Umiya Mata Mandir Bopal-Ghuma Road, Bopal Ghuma, Ahmedabad - 380058AhmadabadGUJARAT. Name of principal investigator: Dr Chintan B Patel. Site 3 : All India …
14_Zydus Life_COVID.pdf .txt.csv	70639	CTRI/2022/06/043365 [Registered on: 20/06/2022] Trial Registered Prospectively	\a prospective, randomized, open label, active controlled, multicenter, phase iii clinical study to evaluate the immunogenicity and safety of single booster dose of zycov-d of m/s zydus lifesciences limited in adult subjects already vaccinated with 2 doses of covaxin or covishield\.,	a prospective, randomized, open label, active controlled, multicenter, phase iii clinical study to evaluate the immunogenicity and safety of single booster dose of zycov-d of m/s zydus lifesciences limited in adult subjects already vaccinated with 2 doses of covaxin or covishield	0.978947	\Novel Corona virus-2019-nCoV Vaccine (recombinant)\.,	ZyCoV-D - Novel Corona Virus-2019-nCov vaccine of M/s. Zydus Lifesciences Limited	4. \New Delhi\ and \03-JUN-2022\.,	20/06/2022	: Each 0.1 mL Contains DNA plasmid construct with spike protein gene region from SARS-CoV-2 virus (Produced in E. coli) 1 mg and Phosphate Buffered Saline q.s.,	\Liquid for Injection for Intradermal (ID) route of administration (using Pharmajet Tropis device)\.,	Subject will be administered single dose of 3mg once during the study. 3mg dose of ZyCoVD consists of 3 shots of 0.1ml each via intradermal route using Pharmajet Tropis device at three different sites on the upper arm (2 shots on one arm (recommended distance between two shots is at least 5 cms) and 1 shot on other arm)	\For active immunization of individuals 12 years old and above for the prevention of Corona Virus Disease 2019\.,	Healthy Volunteers	" :", "- Maharaja Agrasen Hospital Superspeciality Hospital, Central Spine, Agrasen Aspatal Marg, Sector 7, Vidyadhar Nagar, Jaipur - 302039, Rajasthan. Institutional Ethics Committee, Maharaja Agrasen Hospital Superspeciality Hospital, Central Spine, Agrasen Aspatal Marg, Sector 7, Vidyadhar Nagar, Jaipur - 302039, Rajasthan. ECR/2/Inst/RJ/2019. Name of Principal Investigator: Dr. Manish Kumar J…	Site 1 : Aatman Hospital Basement, Research Room, Aatman Hospital, 5, Anveshan Row House, Opp Umiya Mata Mandir, Bopal-Ghuma Road, Bopal, Ahmedabad - 380058AhmadabadGUJARAT. Name of principal investigator: Dr Chintan Patel. Site 2 : All India Institute of Medical Science, Patna, Bihar – 801507PatnaBIHAR. Name of principal investigator: Dr Chandramani Singh. Site 3 : Government Medical College & G…
Sr. No. 58 CT-39-21-Syngene.pdf .txt.csv	56575	CTRI/2021/08/035514 [Registered on: 09/08/2021] Trial Registered Prospectively	a randomized, double-blind, multi-centre 2-arm, parallel-group, placebo controlled study to investigate the efficacy and safety of intravenous imatinib mesylate in reducing the severity of hypoxemic respiratory failure in patients with critical covid-19 receiving standard of care.	a randomized, double-blind, multicenter 2-arm, parallel-group, placebo-controlled study to investigate the efficacy and safety of intravenous imatinib mesylate in reducing the severity of hypoxemic respiratory failure in patients with critical covid-19 receiving standard of care.	0.978799	Imatinib Mesylate 8mg/ml Solution for Infusion.	Imatinib 8 mg/mL	4. The place of the document is New Delhi and the date is not specified.	09/08/2021	Imatinib Mesylate <=8.0000 mg/ml Ph. Eur Active.	Solution for Infusion.	25 mL of study drug administered as an IV infusion over two hours (12.5mL/hour)twice daily for 10 days.	as treatment for Acute Respiratory Distress Syndrome (ARDS).	(1) ICD-10 Condition: B972||Coronavirus as the cause of diseases classified elsewhere, (2) ICD-10 Condition: B342||Coronavirus infection, unspecified,	1. Department of General Medicine, Sir Sayajirao General Hospital (SSG Hospital), Medical College Baroda, Maharaja Sayajirao University of Baroda, Jail Road (Indira Avenue), Anandpura, Vadodara, Gujarat -390001. Ethics committee details: Institutional Ethics Committee of Human Research Sir Sayajirao General Hospital (SSG Hospital), Medical College Baroda, Maharaja Sayajirao University of Baroda, …	Site 1 : Father Muller Medical College Hospital Department of General Medicine, Room number not available, Father Muller road, Kankanady, Mangalore 575002.Dakshina KannadaKARNATAKA. Name of principal investigator: Dr VENKATESH B M. Site 2 : Government Medical College and Hospital Department of Medicine, Room number not available, Medical Square, Nagpur 440003NagpurMAHARASHTRA. Name of principal i…
Sr. No. 91 CT-94-21-ICMR.pdf .txt.csv	57104	CTRI/2021/12/038710 [Registered on: 17/12/2021] Trial Registered Prospectively	\an international multicenter, randomized double-blind, placebo-controlled trial of the safety and efficacy of anti-coronavirus hyperimmune intravenous immunoglobulin for the treatment of adult outpatients in early stages of covid-19\. ,	an international multicenter, randomized, double-blind, placebo- controlled trial of the safety and efficacy of anti-coronavirus hyperimmune intravenous immunoglobulin for the treatment of adult outpatients in early stages of covid-19	0.978723	Anti-COVID-19 Hyperimmune Globulin (Human) (Anti-COVID-19 hIVIG). ,	Anti SARS CoV-2 Hyperimmune Intravenous Immunoglobulin	of the document are New Delhi and the date is not mentioned in the prompt. ,	17/12/2021	Sodium Caprylate, Polysorbate, Proline, and Anti-COVID-19 Hyperimmune Globulin (Human). The active ingredient is Anti-COVID-19 Hyperimmune Globulin (Human) and the inactive ingredients are Sodium Caprylate, Polysorbate, and Proline. ,	Solution for infusion. ,	Anti-Coronavirus Hyperimmune IVIG contains polyvalent antibodies with neutralizing specificity for SARS-CoV-2. It has the potential to provide a standardized therapy to augment host immunity to SARS-CoV-2 and prevent disease progression in symptomatic patients. Hyperimmune IVIG differs from standard IVIG in its derivation from donors who have mounted an immune response to the infection of interes…	COVID-19. ,	, (1) ICD-10 Condition: B972||Coronavirus as the cause of diseases classified elsewhere,	not fully mentioned in the prompt. The names and addresses of two clinical trial sites are mentioned - Department of Medicine, PGIMER, Chandigarh-160012 and All India Institute of Medical Sciences (AIIMS), Jodhpur-342005. The ethics committee details, ECR number beginning with 'ECR', and name of the investigator are also mentioned for these two sites." )	Site 1 : All India Institute of Medical Science, Jodhpur Department of Internal Medicine, Basni Industrial Area, MIA 2nd Phase, Basni, Jodhpur, Rajasthan 342005 Jodhpur RAJASTHAN JodhpurRAJASTHAN. Name of principal investigator: Dr Deepak Kumar. Site 2 : Post Graduate Institute of Medical Education and Research, Chandigarh Department of Internal Medicine, Madhya Marg, Sector 12, Chandigarh, 16001…
69IQVIA.pdf .txt.csv	46964	CTRI/2020/10/028183 [Registered on: 01/10/2020] Trial Registered Prospectively	a phase iii, multicenter, randomized, parallel group, double-blind, double-dummy, active controlled study of evobrutinib compared with teriflunomide, in participants with relapsing multiple sclerosis to evaluate efficacy and safety	a phase iii, multicenter, randomized, parallelgroup, double blind, double dummy, active controlled study of evobrutinib compared with teriflunomide, in participants with relapsing multiple sclerosis to evaluate efficacy and safety.	0.978541	Evobrutinib	Evobrutinib (M2951) 45mg administered orally twice daily	4. Place: New Delhi, Date: Not mentioned	01/10/2020	Evobrutinib = 45.0000 milligram (mg) in House Specification Active	Dosage form: Immediate release Film Coated Tablet	Blinding will be accomplished using a double dummy design given the differences in tablet characteristics between Evobrutinib and Aubagio®. For the purpose of this study, Evobrutinib matching placebo tablets and Aubagio® matching placebo tablets have been developed. Placebo tablets have the same visual appearance as the active tablets.	Indications: Relapsing Multiple Sclerosis	(1) ICD-10 Condition: G35||Multiple sclerosis,	Details of clinical trial sites: 1. Fortis Flt. Lt. Rajan Dhall Hospital, Sector-B Pocket-1, Aruna Asaf Ali Marg, Vasant Kunj, New Delhi-110070, Ethics Committee for Research Fortis Flt. Lt. Rajan Dhall Hospital, Sector-B Pocket-1, Aruna Asaf Ali Marg, Vasant Kunj, New Delhi-110070, ECR/57/Inst/DL/13/RR-19, Dr. Madhuri Behari 2. Lata Mangeshkar Medical Foundation's, Deenanath Mangeshkar Hospital …	Site 1 : Mallikatta Neuro Centre 3rd floor, Neurology department, Super Specialty building,Opp.MallikattaCircle Kadri Mangalore-575002 Karnataka IndiaBangalore RuralKARNATAKA. Name of principal investigator: Dr Shankara Nellikunja. Site 2 : Max Super Speciality Hospital Ground floor, Neurology department,Saket(West Block), 1 Press Enclave Road, Saket, New Delhi-110017, India. New DelhiDELHI. Name…
Sr. No. 109 CT-73-21-Astrazeneca.pdf .txt.csv	63231	CTRI/2022/04/041578 [Registered on: 01/04/2022] Trial Registered Prospectively	\an open-label, long-term extension study of brazikumab in participants with moderately to severely active crohn’s disease (intrepid ole)\.,	an open-label, long-term extension study of brazikumab in participants with moderately to severely active crohn’s disease (intrepid ole)	0.978417	The name of the drug is Brazikumab.,	Brazikumab	New Delhi and the date is not mentioned.,	01/04/2022	is Brazikumab = 720.0000 milligram (mg) In House Specification Active and Brazikumab = 120.0000 mg/ml In House Specification Active.,	Solution for infusion and Pre filled Syringe.,	Eligible non-responders will receive IV induction dosing with of brazikumab at Week 0, Week 4, and Week 8 followed by maintenance dosing of brazikumab SC every 4 weeks thereafter up to Week 52	Moderate to severe Active Crohn’s Disease.,	(1) ICD-10 Condition: K509||Crohns disease, unspecified,	as follows:", "1. Acharya Vinoba Bhave Rural Hospital, Jawaharlal Nehru Medical College, Datta Meghe Institute of Medical Sciences, Sawangi (Meghe), Wardha-442001, Maharashtra, India. Ethics committee details: Institutional Ethics Committee, Datta Meghe Institute of Medical Sciences (DU), Sawangi (Meghe), Wardha-442004, Maharashtra, India. ECR number: ECR/440/Inst/MH/2013/RR-19. Name of the inves…	Site 1 : Aakash Healthcare Super Specialty Hospital Dept. of Gastroenterology Hospital Plot, Rd Number 201, Dwarka Sector-3, PIN-110075New DelhiDELHI. Name of principal investigator: Dr Sharad Malhotra. Site 2 : Acharya Vinoba Bhave Rural Hospital Dept. of Gastroenterology Jawaharlal Nehru Medical College, Datta Meghe Institute of Medical Sciences, Sawangi Meghe, Wardha-442004WardhaMAHARASHTRA. N…
Sr. No. 6 CT-81-22-Ms. pfizer.pdf .txt.csv	73474	CTRI/2023/01/049349 [Registered on: 31/01/2023] Trial Registered Prospectively	single-arm study of lorlatinib in participants with anaplastic lymphoma kinase (alk) - positive non-small cell lung cancer (nsclc) whose disease progressed after one prior second-generation alk tyrosine kinase inhibitor (tki).	single-arm study of lorlatinib in participants with anaplastic lymphoma kinase (alk)-positive non-small cell lung cancer (nsclc) whose disease progressed after one prior second-generation alk tyrosine kinase inhibitor (tki)	0.97807	Lorlatinib (PF-06463922).	Lorlatinib	4. New Delhi and the date is not mentioned in the prompt.	31/01/2023	Lorlatinib = 25.0000 milligram (mg) in House Specification Active.	Tablets.	Participants will take 100 mg (four, 25 mg tablets) once daily and Total duration for this drug intervention is 2 years.	the treatment of adult patients with Anaplastic Lymphoma Kinase (ALK)-Positive Non-Small Cell Lung Cancer (NSCLC) Whose Disease Progressed After One Prior Second-Generation ALK Tyrosine Kinase Inhibitor (TKI).	(1) ICD-10 Condition: C349||Malignant neoplasm of unspecifiedpart of bronchus or lung,	: - Bhakti Vedanta Hospital & Research Institute, Bhakti Vedanta Swami Marg, Shrishti Complex, Mira-Road (E) Thane, Maharashtra, India-401-107. Ethics committee details: Bhakti Vedanta Hospital Ethics Committee, Bhakti Vedanta HEC Office, 6th Floor, Bhakti Vedanta Swami Marg, Shrishti Complex, Mira-Road (E) Thane, Maharashtra, India-401-107. ECR/396/Inst/MH/2013/RR-19. Name of the investigator: D…	Site 1 : Bhaktivedanta Hospital & Research Institute Medical Research Department, OncologyDivision OPD 3, 1st floor,Srishti Complex, Bhaktivedanta Swami Marg, Mira Road (East) Thane 401107 MumbaiMAHARASHTRA. Name of principal investigator: Nirmal Raut. Site 2 : Healthcare Global Enterprises Limited Clinical Research Dept., Oncology Division, Tower 4, 5th floor, room No 8, P Kalinga Rao Road, Samp…
Sr. No. 17 Ct-78-22-M.s. Star Genomics.pdf .txt.csv	75367	CTRI/2023/04/051609 [Registered on: 13/04/2023] Trial Registered Prospectively	\a phase 2 open-label basket study of fs118, a lag-3/pd-l1 bispecific antibody, in subjects with advanced and early-stage malignancies\	a phase 2 open-label basket study of fs118, a lag-3/pd-l1 bispecific antibody, in subjects with advanced and early-stage malignancies	0.977941	FS118	FS118	of the document are New Delhi and not specified	13/04/2023	is FS118 =15.000 mg/ml In House Specification Active	an injection (IV infusion)	Dosage Form / composition:_x000D_ FS118 Injection is a sterile, unpreserved, colorless or pale yellow, clear liquid in a single use vial that contains FS118 drug substance at a nominal concentration of 15.0 ± 1.5 mg/mL in 10 mM potassium phosphate, 150 mM L-arginine, 150 mM glutamic acid, 1% trehalose, 0.04% polysorbate 20, pH 6.3._x000D_ _x000D_ Details of manufacturing site :_x000D_ Patheon, pa…	advanced and early-stage malignancies	(1) ICD-10 Condition: C833||Diffuse large B-cell lymphoma, (2) ICD-10 Condition: C349||Malignant neoplasm of unspecifiedpart of bronchus or lung,	as follows:", "1. Name and address of clinical trial site: Room No. 313, Third Main OPD building, Dept. of Medical Oncology VMMC & Safdarjung Hospital, New Delhi-110029. Ethics Committee Details: Institutional Ethics Committee, Room No. 516, 5th Floor, Main OPD Building, VMMC & Safdarjung Hospital, New Delhi-110029. ECR number: ECR/.../... Name of Investigator: Dr. Kaushhal Kalra.", "2. Name and …	Site 1 : DayCare Angels Under Advani Olickal Healthcare Daycare angels Under Advani Olickal healthcare 3rd Flr Sushrut Hospital and Research Center 365 Swastik Park Chembur (East) Mumbai 400071Mumbai (Suburban)MAHARASHTRA. Name of principal investigator: Dr Sangeeta Jiwatani. Site 2 : Health Care Global Enterprises Limited HCG- Towers #8 P.Kalinga Rao Road Sampangiram Nagar Bangalore Karnataka - …
Sr. No. 6 Ct-102-21-Qascent Research.pdf .txt.csv	62893	CTRI/2022/03/040775 [Registered on: 03/03/2022] Trial Registered Prospectively	\a phase ii, multicentre, randomized, two-arm blinded study to assess the efficacy and safety of two lxe408 regimens for treatment of patients with primary visceral leishmaniasis.\ ,	a phase ii, multicentre, randomized, two-arm blinded study to assess the efficacy and safety of two lxe408 regimens for treatment of patients with primary visceral leishmaniasis	0.977778	\LXE408 (Proteasome Inhibitor).\ ,	LXE408	of the document are \New Delhi\ and the date is not mentioned in the prompt. ,	03/03/2022	mentioned in the prompt is \LXE408 fumaric acid = 63.1000 milligram (mg).\ No information is given about inactive ingredients. ,	\Tablets.\ ,	Arm-1: 300 mg tablet Peroral (PO) once daily (QD) for 7 days, followed by once daily (QD) Matching Placebo for 7 Days. Matching Placebo has been added to keep the study blinded	\Primary Visceral Leishmaniasis.\ ,	(1) ICD-10 Condition: B550||Visceral leishmaniasis,	given in the Annexure of the document. The names and addresses of the clinical trial sites are \"Kala Azar Medical Research Centre (KAMRC), Rambagh Rd, Mahammadpur Kazi, Chandwara, Muzaffarpur-842002, Bihar, India\" and \"Rajendra Memorial Research Institute of Medical Sciences (RMRIMS) – ICMR, Department of Health Research, Ministry of Health & Family Welfare Govt. Of India, Agamkuan, Patna-8000…	Site 1 : Kala Azar Medical Research Centre (KAMRC) Rambagh Road, Mahammadpur Kazi, Chandwara, Muzaffarpur-842002 Bihar, IndiaMuzaffarpurBIHAR. Name of principal investigator: Prof Dr Shyam Sundar. Site 2 : Rajendra Memorial Research Institute of Medical Sciences (RMRIMS) ICMR, Department of Health Research, Ministry of Health & Family Welfare Govt. of India. Agamkuan, Patna-800007, Bihar, IndiaPa…
Sr. No. 15 Ct-106-22-Ms. GSK.pdf .txt.csv	75628	CTRI/2023/02/050042 [Registered on: 24/02/2023] Trial Registered Prospectively	\phase 3 multicenter, randomized, double-blind, study to assess the efficacy and safety of treatment with bepirovirsen in hbeag-negative nucleos(t)ide analogue-treated participants with chronic hepatitis b virus (b-well 1)\.,	phase 3 multicenter, randomized, double-blind, study to assess the efficacy and safety of treatment with bepirovirsen in hbeag-negative nucleos(t)ide analogue-treated participants with chronic hepatitis b virus (b-well 1)	0.977679	GSK3228836 Solution for Injection 150 mg/mL (Bepirovirsen).,	Bepirovirsen	of the document are New Delhi and the date is not specified.,	24/02/2023	Water for injection, Inactive Sodium Hydroxide, Inactive Hydrochloric Acid, and Bepirovirsen sodium as the active ingredient.,	a solution for injection.,	150 mg/mL; 1.0 mL nominal volume per vial_x000D_ (minimal overfill per vial)_x000D_ 2 Injection Subcutaneously every week for 24 weeks	for the treatment of adult participants (18 years of age) with chronic hepatitis B infection.,	(1) ICD-10 Condition: D50-D89||Diseases of the blood and blood-forming organs and certain disorders involving the immune mechanism,	The details of the clinical trial sites include the names and addresses, ethics committee details, ECR number beginning with 'ECR', and name of the investigator. The details are provided in the Annexure section of the document." )	Site 1 : Apollo Hospitals Road no. 72, Opp. Bharatiya Vidya Bhavan’s Public School, Jubilee Hills, Hyderabad-500096, Telangana, IndiaHyderabadTELANGANA. Name of principal investigator: Dr Somasekhar Rao. Site 2 : B.Y.L Nair Hospital & T N Medical College Dept. Of Gastroenterology, 7th Floor, OPD Building, Dr. A.L Nair Road, Mumbai Central, Mumbai - 400008, Maharashtra, IndiaMumbaiMAHARASHTRA. Nam…
Sr. No. 30 Ct-45-20-George Clincal.pdf .txt.csv	44387	CTRI/2020/08/027109 [Registered on: 13/08/2020] Trial Registered Prospectively	a multi-center, open-label, randomized parallel controlled evaluation on the efficacy and safety of bdb001 injection in the treatment of progressive severe covid-19 in phase ii.	a multi-center, open-label, randomized parallel controlled evaluation on the efficacy and safety of bdb-001 injection in the treatment of progressive severe covid-19 in phase ii	0.977654	BDB-001.	BDB-001	4. New Delhi and the date is not mentioned in the prompt.	13/08/2020	- Relative Binding Activity 70.0000 to130.0000 % In House Specification Active - Biological activity 70.0000 to150.0000 % In House Specification Active - Size Exclusion Chromatography (SEC) >96.0000 % In House Specification Inactive - Protein Content 9.0000 to11.0000mg/ml In House Specification Active	Injection.	Dosing plan: BDB-001 for infusion, 300 mg/person/time, intravenous injection, at days 1, 2, 3, 5,7,9,11, and 13,8 times in total (dosage and frequency of administration can be adjusted according to the progression of the disease)._x000D_ _x000D_ BDB-001 is a recombinant humanized anti-human C5a IgG4κ monoclonal antibody for injection, which contains a total of 1328 amino acids and is composed of …	Severe COVID-19.	(1) ICD-10 Condition: B972||Coronavirus as the cause of diseases classified elsewhere,	: - M S Ramaiah Medical College and Hospitals, M S Ramaiah Nagar, MSRIT Post, Bangalore-560054, Karnataka, India Ethics committee details: Ethics Committee, M S Ramaiah Medical College and Hospitals, M S Ramaiah Nagar, MSRIT Post, Bangalore-560054, Karnataka, India ECR number: ECR/215/Inst/KA/2013/RR-16 Name of investigator: Dr. T Anil Kumar - Sir Ganga Ram Hospital, Old Rajinder Nagar, New Delhi…	Site 1 : Gadag Institute of Medical Sciences SH 6, Malasamudra, 582103GadagKARNATAKA. Name of principal investigator: Dr Jagadeesh G. Site 2 : Government medical college and Hospital Room No. 47, Department of Medicine, Hanuman Nagar, Ajni Road, Medical chowk, Ajni Nagpur 440003NagpurMAHARASHTRA. Name of principal investigator: Dr Atul Rajkondawar. Site 3 : Marudhar Hospital A-93-99, Singh Bhoomi…
Sr. No. 55 CT-47-21-medpace.pdf .txt.csv	60314	CTRI/2021/11/037835 [Registered on: 08/11/2021] Trial Registered Prospectively	open-label extension phase 3 study to evaluate the long-term efficacy and safety of lib003 in patients with homozygous and heterozygous familial hypercholesterolemia, cardiovascular disease, or at high risk for cardiovascular disease, on stable lipid-lowering therapy requiring additional low-density lipoprotein cholesterol reduction (liberate-ole).	open-label extension phase 3 study to evaluate the long-term efficacy and safety of lib003 in patients with homozygous and heterozygous familial hypercholesterolemia, cardiovascular disease, or at high risk for cardiovascular disease, on stable lipid-lowering therapy requiring additional low-density lipoprotein cholesterol reduction (liberate-ole)	0.977401	LIB003.	LIB003	4. of the document are New Delhi and the date is not mentioned.	08/11/2021	LIB003 = 250.0000 mg/ml U.S.P. Active.	Sterile Solution for Injection.	SC injection in either the abdomen, thigh or_x000D_ upper arm (which may be rotated) on Week 0 and Weeks 4, 8, 12, 16, 20, 24, 28, 32, 36, 40, 44,_x000D_ 48, 52, 56, 60, 64, and 68	Low-density lipoprotein cholesterol (LDL-C) reduction in patients with atherosclerotic cardiovascular (CV) disease (ASCVD), high risk of ASCVD, or homozygous familial hypercholesterolemia (HoFH) or heterozygous familial hypercholesterolemia (HeFH) without CV disease (CVD) who require additional LDLC reduction.	(1) ICD-10 Condition: E783||Hyperchylomicronemia,	1. VMMC & Safdarjung Hospital, New Delhi-110029 2. CIMS Hospital Pvt. Ltd. Opp. Panchamrut Bunglows, Nr. Shukan Mall, Off. Science city Road, Sola, Ahmedabad-380060 Gujarat, India 3. Department of Cardiology, King George's Medical University, Chowk, Lucknow 226003 India 4. Sir Ganga Ram Hospital Sir Ganga Ram Hospital Marg, Rajinder Nagar, New Delhi-1 10060 5. Room No. 133, 1st Floor, Academic Bl…	Site 1 : Care Institute of Medical Sciences Near. Shukan Mall, Off. Science City Road, Sola , AhmedabadAhmadabadGUJARAT. Name of principal investigator: Dr Milan Chinubhai Chag. Site 2 : Department of Cardiology Sanjay Gandhi Postgraduate Institute of Medical Sciences, Raebareli Road , Lucknow New DelhiDELHI. Name of principal investigator: Dr Aditya Kapoor. Site 3 : G .B. Pant Institute of Postg…
75.pdf .txt.csv	67636	CTRI/2023/05/052618 [Registered on: 15/05/2023] Trial Registered Prospectively	a phase iv, prospective, open label, single-arm, multicentre clinical study to evaluate the safety and efficacy of teriparatide in patients with postmenopausal osteoporosis.	a phase iv, prospective, open label, single-arm, multicenter clinical study to evaluate the safety and efficacy of teriparatide in patients with postmenopausal osteoporosis.	0.977143	Teriparatide Injection, I.P.	Teriparatide Injection IP 600 mcg/2.4 mL	4. New Delhi, 11.03.2022.	15/05/2023	Teriparatide drug substance (IP), Sodium acetate (USP), Acetic acid glacial (I.P, JP, USP, BP/Ph. Eur), D- Mannitol (I.P, BP/Ph.Eur.), m-Cresol (Ph. Eur, USP/NF), Sodium hydroxide (I.P, JP,NF, BP/Ph. Eur), Hydrochloric acid (I.P, JP, NF, BP/Ph. Eur), and Water for Injection (IP, USP).	Teriparatide Injection 600 mcg/2.4 mL, Disposable Pen with pre-assembled cartridge in a blister card.	Teriparatide Injection IP 600 mcg/2.4 mL, subject will self-administer 20 mcg from the injection into the thigh or abdominal wall once daily for 24 weeks	Postmenopausal Osteoporosis.	(1) ICD-10 Condition: M810||Age-related osteoporosis without current pathological fracture,	The details of the clinical trial sites include the names and addresses of Lifepoint Multispecialty hospital, Institute Of Medical Sciences Banaras Hindu University, Medical College and hospital, Sancheti Institute for Orthopedics and Rehabilitation, Christian Medical College, King George Hospital, and Om Research Center. The ethics committee details, ECR number beginning with 'ECR', and name of …	Site 1 : HBT Trauma Care Hospital HBT trauma care hospital , Ajgaokar plot , Western express highway Jogeshari , East Mumbai 400060 MumbaiMAHARASHTRA. Name of principal investigator: Dr Amit Joshi. Site 2 : Imperial Hospital & Research Centre Imperial Hospital Research Center A-56 Shastri Nagar Near Kawatia Circle Jaipur -302016, Rajasthan India JaipurRAJASTHAN. Name of principal investigator: Dr…
9_Gennova_COVID.pdf .txt.csv	66638	CTRI/2022/04/041880 [Registered on: 18/04/2022] Trial Registered Prospectively	\a prospective, multicentre, randomized, phase ii study seamlessly followed by a phase iii study to evaluate the safety, tolerability and immunogenicity of the candidate gemcovac-19 (covid-19 vaccine) in healthy pediatric subjects of 5 to less than 18 years.\,	a prospective, multicentre, randomized, phase ii study seamlessly followed by a phase iii study to evaluate the safety, tolerability and immunogenicity of the candidate gemcovac-19 (covid-19 vaccine) in healthy pediatric subjects of 5 to less than 18 years	0.976834	HGCO19 Lyophilized mRNA Vaccine for Injection (COVID-19).,	GEMCOVAC-19 (COVID-19 vaccine)	4. New Delhi, 29.03.2022.,	18/04/2022	: \n- Active ingredient: m-RNA 50 mcg\n- Inactive ingredients: DOTAP 1.5 mg, Squalene 1.88 mg, Sorbitan Monostearate 1.86mg, Polysorbate 80 Ph.Eur. 1.86 mg, Sucrose IP 250 mg, Citric acid monohydrate IP 5.25 mg, Sterile Water for Injection IP (For reconstitution) 6 ml.,	a lyophilized powder for injection by intramuscular route.,	In 12 to less than 18 years, GEMCOVAC-19 will be administered as a 2 dose schedule on Day 1 and 29 at 10 micrograms intramuscularly._x000D_ _x000D_ In 5-11 years , GEMCOVAC-19 will be assesseed in Phase II at 5 and 10 micrograms as a 2 dose regimen intramuscularly. In phase IIII(In 5-11 years), one dose will be selected to be administered as a 2 dose schedule intramuscularly._x000D_ The study in …	for active immunization against SARS-CoV-2 (COVID-19).,	Active immunization to develop immunological protection for prevention of severe_x000D_ acute respiratory syndrome coronavirus 2 (SARS-CoV-2) infection	" :\n- Meditrina Institute, 278, Central bazar road, Ramdaspeth, Nagpur, Nagpur - 440010, Maharashtra, India. Ethics Committee details: Meditrina Institute Ethics Committee. Name of Principal Investigator: Dr. Sandeep Mogre.\n- JSS Medical College and Sri Shivarathreeshwara Nagar Mysuru (Mysore) Karnataka - 570015, India. Ethics Committee details: Institutional Ethics Committee JSS Medical Colleg…	Site 1 : All India Institute of Medical Sciences, Pediatric OPD, First Floor, B Block, Gate No. 04, G.E. Road, Tatibandh, 492099 RaipurCHHATTISGARH. Name of principal investigator: Dr Atul Jindal. Site 2 : All India Institute of Medical Sciences, 1st Floor, Room Mo. 103, Aayush Building, Basni Industrial Area, MIA 2nd Phase, Basni, 342005, JodhpurRAJASTHAN. Name of principal investigator: Dr Jagd…
26_ BBIL Hetrologus.pdf .txt.csv	59216	CTRI/2021/08/035993 [Registered on: 27/08/2021] Trial Registered Prospectively	a phase 2 randomized, multi-centric, clinical trial of heterologus prime-boost combination of sars-cov-2 vaccines to evaluate the immunogenicity and safety of bbv152 (covaxin®) with bbv154 (adenoviral intranasal covid-19 vaccine) in healthy volunteers.	a phase 2 randomized, multi-centric, clinical trial of heterologus prime-boost combination of sarscov- 2 vaccines to evaluate the immunogenicity and safety of bbv152 (covaxin®) with bbv154(adenoviral intranasal covid-19 vaccine) in healthy volunteers.	0.976378	Whole Virion Inactivated Corona Virus Vaccine, [BBV152] (COVAXIN) and Chimpanzee Adenovirus Vectored COVID-19 Vaccine (BBV154).	BBV152	4. New Delhi, 11.08.2021.	27/08/2021	The composition of the new drugs is provided in a table in the prompt, with active and inactive ingredients listed for each drug.	Liquid for intramuscular injection and Liquid for intranasal route of administration (nasal drop).	0.5 mL Vero cell derived inactivated vaccine containing NLT 6μg and_x000D_ administered as a single dose intramuscularly (IM)	For active immunization against Corona Virus Infections (COVID-19) caused by SARS-CoV-2.	To prevent SARS-CoV2- infection	provided in a table in the prompt, with names and addresses, ethics committee details, ECR numbers, and names of principal investigators listed for each site.	Site 1 : All India Institute of Medical Scienecs Delhi Department of General Medicine 2nd floor Room no 202 Sri Aurobindo Marg Ansari nagar Delhi New DelhiDELHI. Name of principal investigator: Dr Sanjeev Sinha. Site 2 : Gillurkur Multispeciality Hospital second floor room no 203 20, reshimbag Umrer Road Nagpur - 440009NagpurMAHARASHTRA. Name of principal investigator: Dr Chandrasekhar S Gillurku…
37 CT-17-21-Novartis.pdf .txt.csv	52163	CTRI/2021/05/033375 [Registered on: 05/05/2021] Trial Registered Prospectively	an open label, multi-center, phase iv rollover protocol for patients who have completed a prior global novartis or incyte sponsored ruxolitinib (inc424) study or ruxolitinib and panobinostat (lbh589) combination study, and are judged by the investigator to benefit from continued treatment.	an open label, multi-center, phase iv rollover protocol for patients who have completed a prior global novartis or incyte sponsored ruxolitinib (inc424) study or ruxolitinib and panobinostat (lbh589) combination study, and are judged by the investigator to benefit from continued treatment	0.976109	INC424 (Ruxolitinib).	oral pediatric formulation	4. The place of the document is New Delhi and the date is not mentioned in the prompt.	05/05/2021	INC424(Ruxolitinib) = 5.0000 milligram (mg) in-house specification active.	tablets.	Subjects below 12 years to be given oral formulation as per parent protocol. Patient to continue taking medication till patient benefits.	graft vs host disease after allogenic stem cell transplantation.	(1) ICD-10 Condition: D898||Other specified disorders involving the immune mechanism, not elsewhere classified,	: - Name and address of clinical trial site: Sahyadri Super Speciality Hospital, Plot No. 30-C Erandwane, Karve Road, Deccan Gymkhana, Pune - 411004, Maharashtra, India. - Ethics committee details: Sahyadri Hospitals Ltd. Ethics Committee, Sahyadri Clinical Research and Development Centre (A Unit of Sahyadri Hospitals Ltd.), 33/34B, Makarand, Bhave Path, Karve Road, Pune - 411004, Maharashtra, In…	Site 1 : Sahyadri Super Speciality Hospital Plot No.30-C, Dept of Hematology and BMT Erandwane, Karve Road, Deccan Gymkhana, Pune 411004 Maharashtra, IndiaPuneMAHARASHTRA. Name of principal investigator: Dr Shashikant Janardan Apte
27_ DRL Sputnik Light .pdf .txt.csv	60333	CTRI/2021/09/036830 [Registered on: 24/09/2021] Trial Registered Prospectively	phase iii, open label, un-controlled, multicentre, bridging study to evaluate immunogenicity and safety of single dose of sputnik light in indian adults and elderly for prevention of sars-cov-2 infection.	phase iii, open label, un-controlled, multicenter, bridging study to evaluate immunogenicity and safety of single dose of sputnik light in indian adults and elderly for prevention of sars-cov-2 infection	0.975728	A vector vaccine for the prevention of the coronavirus infection induced by the SARSCoV-2 virus - (Sputnik Light).	Sputnik Light	4. New Delhi, 16-Aug-2021.	24/09/2021	: - Active ingredient: Recombinant adenovirus serotype 26 particles containing the SARS-CoV-2 protein S gene (1.0±0.5 х 1011 particles) - Inactive ingredients: Tris (Hydroxymethyl) amino methane (1.21 mg), Sodium Chloride (2.19 mg), Sucrose (25.00 mg), Magnesium Chloride Hexahydrate (102.00 μg), EDTA disodium salt dehydrate (19.00 μg), Polysorbate 80 (250.00 μg), Ethanol 95% (2.50 µg), Water for …	a solution (frozen) for intramuscular route of administration, to be given in a single dose (0.5 ml).	Recombinant adenovirus serotype 26 particles containing the SARS-CoV-2 protein S gene, in the amount of (1.0±0.5) х1011 particles per dose (Component 1 of Gam COVID-VAC Vaccine i.e. Sputnik V)	for the prevention of COVID-19 in adults aged over 18.	Prevention of SARS-CoV-2 Infection	are : 1. Noble Hospital Pvt Ltd, 153, Magarpatta City Road, Hadapsar, Pune - 411013 Maharashtra India, Ethics Committee details: Noble Hospital Institutional Ethics Committee, ECR/259/Inst/MH/2013/RR-19, Name of Principal Investigator: Dr. S. K. Raut. 2. Yashwantrao Chavan Memorial Hospital, Pimpri, Pune, Maharashtra, Institutional Ethics Committee: PCMC’S PGI Yashwantrao Chavan Memorial Hospital…	Site 1 : Ace Hospital & research centre Room no 104,Ground floor Ace Hospital S. No. 32/2A, Gulwani Maharaj road, Irandwane, Pune 411004 PuneMAHARASHTRA. Name of principal investigator: Dr Himanshu Pophle. Site 2 : Ashirwad Hospital & research centre Room no 1,Ground floor, Ashirwad Hospital Marath Section, Near Jijamata udyan, Ulhasnagar - 421004,Thane, Maharashtra, India ThaneMAHARASHTRA. Name …
Sr. No. 107-CT-88-22-J&J.pdf .txt.csv	77236	CTRI/2023/02/049675 [Registered on: 13/02/2023] Trial Registered Prospectively	a randomized, controlled, open-label, multicenter, inferentially seamless phase 2/3 study of ibrutinib in combination with rituximab versus physician’s choice of lenalidomide plus rituximab or bortezomib plus rituximab in participants with relapsed or refractory mantle cell lymphoma	a randomized, controlled, open-label, multicenter, inferentially seamless phase 2/3 study of ibrutinib in combination with rituximab versus physicians choice of lenalidomide plus rituximab or bortezomib plus rituximab in participants with relapsed or refractory mantle cell lymphoma	0.975524	Ibrutinib, Rituximab, Lenalidomide, and Bortezomib	Ibrutinib	of the document are New Delhi and the date is not mentioned	13/02/2023	Ibrutinib, Rituximab, Bortezomib, and Lenalidomide in different milligram quantities	Capsules, Solution for infusion, and Powder for concentrate for solution for infusion	Ibrutinib –560 mg QD (4×140 mg) - capsules- oral_x000D_ Ibrutinib –420 mg QD (3×140 mg) - capsules- oral_x000D_ Ibrutinib –140 mg BID - capsules- oral_x000D_ + Rituximab –375 mg/m2 IV on Day 1 of Cycles 1 to 6	Relapsed / Refractory Mantle Cell Lymphoma	(1) ICD-10 Condition: D758||Other specified diseases of bloodand blood-forming organs,	The details of the clinical trial sites include the names and addresses of the sites, ethics committee details, ECR number beginning with 'ECR', and name of the investigator.	Site 1 : American oncology Institute Room no. 1, 1st floor, 1-100/1/CCH, Citizens Hospital Rd, near Aparna Sarovar, Nalagandla, Telangana-500019, INDIAHyderabadTELANGANA. Name of principal investigator: Dr Anil Aribandi. Site 2 : AMRI hospital 7th floor, Annex Building, Clinical Research Department, 230, Barakhola, Jadavpur, Mukundapur - 700099KolkataWEST BENGAL. Name of principal investigator: D…
Sr. No. 88 Ct-27-21-George Institute.pdf .txt.csv	51638	CTRI/2021/10/037468 [Registered on: 22/10/2021] Trial Registered Prospectively	\an investigator initiated, international multi-centre, multi-arm, multi-stage randomised double blind placebo controlled trial of angiotensin receptor blocker (arb) & chemokine receptor type 2 (ccr2) antagonist for the treatment of covid-19\.,	an investigator initiated, international multi-centre, multi-arm, multi-stage randomised double blind placebo controlled trial of angiotensin receptor blocker (arb) and chemokine receptor type 2 (ccr2) antagonist for the treatment of covid-19	0.975309	DMX-200.,	Dual therapy of candesartan and Repagermanium.	of the document are New Delhi and not provided respectively.,	22/10/2021	is Repagermanium.,	Capsules.,	Oral candesartan 4mg twice daily for 28 days + Repagermanium 120mg immediate release capsule twice daily for 28 days	the treatment of COVID-19.,	(1) ICD-10 Condition: B972||Coronavirus as the cause of diseases classified elsewhere,	:", "1. Lok Nayak Hospital and Maulana Azad Medical College, Jawaharlal Nehru Marg, Near Delhi Gate, New Delhi, Delhi 110002. Ethics committee details: INSTITUTIONAL ETHICS COMMITTEE Maulana Azad Medical College and Associated Hospital (Lok Nayak, G.B. Pant Institute of Postgraduate Medical Education and Research Hospital, Guru Nanak Eye Centre, New Delhi –110 002. ECR/329/Inst/DL/2013. Name of i…	Site 1 : All India Institute of Medical Sciences All India institute of medical sciences, Raipur, Gate No 4, D block , Ground floor G.E Road, Tatibandh, 492099 chhattisgarh RaipurCHHATTISGARH. Name of principal investigator: Dr Vinay Rathore. Site 2 : Amrita Institute of Medical Sciences AIMS Ponekkara PO Kochi 682041KozhikodeKERALA. Name of principal investigator: Merlin Moni. Site 3 : DM Wayana…
Sr. no. 104 CT-68-22-Sunpharma.pdf .txt.csv	70432	CTRI/2023/04/051333 [Registered on: 06/04/2023] Trial Registered Prospectively	“a phase iii, randomized, double-blind, placebo-controlled study to demonstrate the efficacy and safety of tildrakizumab in anti-tnf experienced subjects with active psoriatic arthritis i (inspire 1)”. ,	a phase iii, randomized, double-blind, placebo-controlled study to demonstrate the efficacy and safety of tildrakizumab in anti-tnf experienced subjects with active psoriatic arthritisi(inspire 1)	0.975124	The name of the drug is Tildrakizumab Injection 100 mg/ml. ,	TILD	of the document are New Delhi and the date is not specified. ,	06/04/2023	Tildrakzumab (active ingredient), L-Histidine Ph. Eur./USP, L-Histidine Hydrochloride Monohydrate Ph. Eur, Polysorbate 80 Ph. Eur./USP, Sucrose Ph. Eur./USP, and Water for Injection Ph. Eur./USP (inactive ingredients). ,	Injection. ,	route: tildrakizumab administered by subcutaneous injection_x000D_ dosage: one 1 mL injection of study medication_x000D_ duration of treatment: Week 0-Week 52.	for the treatment of patients with Active Psoriatic Arthritis. ,	(1) ICD-10 Condition: L405||Arthropathic psoriasis,	The details of the clinical trial sites include the names and addresses of the sites, ethics committee details, ECR number beginning with 'ECR', and name of the investigator. The information is provided in the Annexure of the document." )	Site 1 : 7-Orange Hospital Pawana Nagar Housing Society, Chinchwad, Pimpri-Chinchwad, Maharashtra 411033 PuneMAHARASHTRA. Name of principal investigator: Dr Girish Bhatia. Site 2 : Chanre Rheumatology and Immunology Center and Research No. 414/65 , 20th Main, West of Chord Road 1st block , Rajajinagara, Bangalore 560010 BangaloreKARNATAKA. Name of principal investigator: Dr Chandrashekara Srikant…
22 Ct-12-21-Sanofi.pdf .txt.csv	53089	CTRI/2021/08/035384 [Registered on: 04/08/2021] Trial Registered Prospectively	a randomized, double-blind, placebo-controlled, proof of concept study assessing the efficacy and safety of the ripk1-inhibitor sar443122 in patients with moderate to severe subacute or discoid/chronic cutaneous lupus erythematosus.	a randomized, double-blind, placebo controlled, proof of concept study assessing the efficacy and safety of the ripk1-inhibitor sar443122 in patients with moderate to severe subacute or discoid/chronic cutaneous lupus erythematosus	0.974359	SAR443122 (eclitasertib).	SAR443122/ eclitasertib	4. New Delhi, and the date is not specified in the prompt.	04/08/2021	SAR443122 = 100.0000 milligram (mg) (active ingredient), microcrystalline cellulose 50 m = 47.0000 milligram (mg) (inactive ingredient).	capsules.	Dose: SAR443122 100 mg _x000D_ Frequency: 2 intakes (morning and evening) of 3 capsules of 100 mg each _x000D_ Route of Administration: Oral_x000D_ Duration of Therapy: 12 Weeks	discoid/chronic cutaneous lupus erythematosus.	(1) ICD-10 Condition: L931||Subacute cutaneous lupus erythematosus,	: - Department of Rheumatology and Clinical Immunology, Medanta The Medicity, Sector-38, Gurugram, Haryana-001. India, Ethics committee details: Medanta Institutional Ethics Committee, ECR/282/Inst/HR/2013/RR-20, Name of investigator: Dr. Rajiva Gupta - Department of Dermatology, Sir Ganga Ram Hospital, SGRH Marg, Rajinder Nagar, New Delhi-110060, India, Ethics committee details: Sir Ganga Ram Ho…	Site 1 : Assured Care Plus Hospital 4th & 5th Floor, Star Plus Complex, Lam Road, Near Muktidham Temple, Opposite NMC Divisional office, Nashik Road, Nashik 422101, Maharashtra, IndiaNashikMAHARASHTRA. Name of principal investigator: Dr Suneel Chandrakant Vartak. Site 2 : Bowring & Lady Curzon Medical College & Research Institute 1, Lady Curzon Road, Shivaji Nagar, Bengaluru, Karnataka 560001, In…
biocon itolizumab.pdf .txt.csv	75440	CTRI/2022/11/047054 [Registered on: 04/11/2022] Trial Registered Prospectively	a phase ii randomized, double-blind, parallel-group, placebo and active-controlled, two treatment period study to evaluate the safety and efficacy of itolizumab for the induction of remission in biologics nave patients with moderate to severely active ulcerative colitis.	a phase 2 randomized, double-blind, parallel-group, placebo and active-controlled, two treatment period study to evaluate the safety and efficacy of itolizumab for the induction of remission in biologics naïve patients with moderate to severely active ulcerative colitis	0.974359	Itolizumab for Injection (r-DNA origin) 100 mg/vial (single use vial).	Itolizumab	4. New Delhi, 03-Oct-2022.	04/11/2022	Itolizumab (r-DNA origin) mg, Histidine 1.93 mg USP/Ph.Eur., Histidine Hydrochloride Monohydrate 2.22 mg USP/Ph.Eur., Sucrose 94.8 mg USP/Ph.Eur./IP, and Polysorbate 80 0.23 mg USP/Ph.Eur./IP.	Lyophilized powder for i.v injection.	Dose: _x000D_ Treatment Period 1 _x000D_ 140 mg (1.4mL) SC every two weeks starting from Day 1 then Week 2, 4, 6, 8, 10 _x000D_ Treatment Period 2 _x000D_ 140 mg (1.4mL) SC every two weeks on Week 12, 14, 16, 18, 20, 22 _x000D_ Administration: Subcutaneous injection.	for patients with moderate to severely active ulcerative colitis.	(1) ICD-10 Condition: K928||Other specified diseases of the digestive system,	: - Site 1: MS Ramaiah Memorial Hospital, Dept. of Gastroenterology, MSR Nagar, MSRIT post, New BEL Road, PIN-560054, Bangalore. Ethics Committee Details: ECR/215/Inst/KA/2013/RR-22. Name of Principal Investigator: Dr Avinash Balekuduru. - Site 2: Suyash Superspeciality Hospital, Kota Gudhiyari Road, Raipur-492001. Ethics Committee Details: ECR/1546/Inst/CG/2021. Name of Principal Investigator: D…	Site 1 : Amrita Institute of Medical Sciences & Research Centre, Room # 1 Department of Gastroenterology Amrita Institute of Medical Sciences & Research Centre, Ponekkara P.O., Kochi, Kerala, India 682041. KozhikodeKERALA. Name of principal investigator: Dr Shine Sadashivan. Site 2 : Asian Institute of Gastroenterology AIG Hospitals (A unit of Asian Institute of Gastroenterology Hospitals) Depart…
Sr. No. 2 CT-131-21-Parexel.pdf .txt.csv	65897	CTRI/2022/05/042403 [Registered on: 06/05/2022] Trial Registered Prospectively	\randomised, double-blind, placebo-controlled and parallel group trial to investigate the effects of two doses (up-titration to a fixed dose regimen) of oral bi 685509 on portal hypertension after 24 weeks treatment in patients with clinically significant portal hypertension (csph) in compensated cirrhosis\. ,	randomised, double-blind, placebo-controlled and parallel-group trial to investigate the effects of two doses (up-titration to a fixed dose regimen) of oral bi 685509 on portal hypertension after 24 weeks treatment in patients with clinically significant portal hypertension (csph) in compensated cirrhosis	0.974194	BI 685509. ,	BI 685509	of the document are New Delhi and not explicitly stated, respectively. ,	06/05/2022	is BI 685509 ZW = 1.0000 milligram (mg) In House Specification Active, BI 685509 ZW = 2.0000 milligram (mg) In House Specification Active, and BI 685509 ZW = 3.0000 milligram (mg) In House Specification Active. ,	film-coated tablets. ,	2 mg and 3 mg BI 685509 film-coated tablets will be given orally twice daily _x000D_ and duration of treatment will be 24 weeks	portal hypertension (CSPH) in compensated cirrhosis. ,	(1) ICD-10 Condition: K766||Portal hypertension,	as follows: ", "1. Dayanand Medical College and Hospital, Department of Gastroenterology, Tagore Nagar, Civil Lines, Ludhiana, Punjab-141001. Ethics committee details: Drug Trial Ethics Committee, Dayanand Medical College and Hospital, Tagore Nagar, Civil Lines, Ludhiana, Punjab-141001. ECR/101/Inst/PB/2013/RR-19. Name of the investigator: Dr. Ajit Sood. ", "2. Global Hospitals-Super Speciality &…	Site 1 : Dayanand Medical College and Hospital Department of Gastroenterology, Tagore Nagar, Civil Lines, Ludhiana -141001 LudhianaPUNJAB. Name of principal investigator: Dr Ajit Sood. Site 2 : Global Hospitals Super Specialty and Transplant Centre Department of hepatology, 35, Dr. E. Borges Road, Hospital Avenue, Opp. Dr Shirodkar High School, Parel Mumbai -400012 MumbaiMAHARASHTRA. Name of prin…
Sr. No. 108 CT-115-21-PPD.pdf .txt.csv	62557	CTRI/2021/12/038474 [Registered on: 07/12/2021] Trial Registered Prospectively	\a phase 2/3 randomized, double-blind, placebo-controlled trial to evaluate the efficacy and safety of adg20 in the treatment of ambulatory participants with mild or moderate covid-19 (stamp).\,	a phase 2/3 randomized, double-blind, placebo-controlled trial to evaluate the efficacy and safety of adg20 in the treatment of ambulatory participants with mild or moderate covid-19 (stamp)	0.974093	ADG20.,	ADG20 (fully human monoclonal immunoglobulin G (IgG)1 antibody IM)	4. \Place: New Delhi, Date: Not specified.\,	07/12/2021	ADG20 = 100.0000 mg/ml In House Specification Active. The prompt does not provide information on inactive ingredients.,	Injection.,	Route of administration: Participants will receive a single dose of ADG20 as Intramuscular injection on Day 1._x000D_ Duration of therapy: After_x000D_ Day 1, participants will then be followed via telemedicine visits, phone calls, or in-person visits_x000D_ through Month 14 as indicated in the Schedule of Assessments_x000D_ Dose : ADG20 300 mg IM	\Treatment of mild to moderate COVID-19 in adults and adolescents.\,	(1) ICD-10 Condition: B972||Coronavirus as the cause of diseases classified elsewhere, (2) ICD-10 Condition: B342||Coronavirus infection, unspecified,	" :", "- Rajiv Gandhi Medical College and Chhatrapati Shivaji Maharaj Hospital, Thane-Belapur Road, Kalwa, Thane-400605, Maharashtra, India. Ethics committee details: Institutional Clinical Ethics Committee, Thane Municipal Corporation, Rajiv Gandhi Medical College & Chhatrapati Shivaji Maharaj Hospital, Thane Belapur Road, Kalwa Thane- 400605, Maharashtra, India. ECR number: ECR/469/Inst/MH/2013…	Site 1 : All India Institute of Medical Sciences, Raipur Dept of Paediatrics, Room no 1111, Ground floor, All India Institute of Medical Sciences, G.E. Road, Tatibandh, Raipur-492099 (C.G.) All India Institute of Medical Sciences, G.E. Road, Tatibandh, Raipur-492099 (C.G.) RaipurCHHATTISGARH. Name of principal investigator: Dr Atul Jindal. Site 2 : Atharva Multispeciality Hospital and Research Ce…
78AstraZeneca.pdf .txt.csv	49220	CTRI/2020/12/029451 [Registered on: 01/12/2020] Trial Registered Prospectively	a multi-centre phase ii, double-blind, randomised study of savolitinib in combination with osimertinib vs savolitinib in combination with placebo in patients with egfrm+ and met amplified locally advanced or metastatic non-small cell lung cancer who have progressed following treatment with osimertinib.	a multi-centre phase ii, double-blind, randomised study of savolitinib in combination with osimertinib vs savolitinib in combination with placebo in patients with egfrm plus and met amplified locally advanced or metastatic non-small cell lung cancer who have progressed following treatment with osimertinib	0.973856	Savolitinib and Osimertinib tablets.	Savolitinib once daily plus osimertinib once daily	4. New Delhi, and the date is not mentioned.	01/12/2020	Savolitinib = 100.0000 milligram (mg) In House Specification Active, Osimertinib = 40.0000 milligram( mg) In House Specification Active, Osimertinib = 80.0000 milligram (mg) In House Specification Active.	tablets.	1:1 Assignment_x000D_ Oral and once daily until disease progression or toxicity.	to treat patients with (EGFRm+) and MET Ampflified Locally advanced or metastatic Non-Small Cell Lung Cancer (NSCLC) who have progressed Following treatment With Osimertinib.	(1) ICD-10 Condition: C349||Malignant neoplasm of unspecifiedpart of bronchus or lung,	: 1. Shetty’s Hospitals, Plot No. 11& h “F Main, Kaveri Nagar, Bommanahalli, Bangalore - 560068, Karnataka, India. Ethics committee details: Shetty’s Hospital Ethics Committee. ECR number: ECR/918/Inst/KA/2017/RR-20. Name of the investigator: Dr. Satheesh C.T. 2. Kokilaben Dhirubhai Ambani Hospital and Medical Research Institute, 2nd floor, Rao Saheb Achutrao Patwardhan Marg, Four Bunglows, Andhe…	Site 1 : Kokilaben Dhirubhai Ambani Hospital and Medical Research Institute Dept. of Medical Oncology Consultant Medical Oncologist Kokilaben Dhirubhai Ambani Hospital and Medical Research Institute, Rao Saheb, Achutrao Patwardhan Marg, Four Bungalows, Andheri West, Mumbai, PIN 400053 MumbaiMAHARASHTRA. Name of principal investigator: Dr Imran Shaikh. Site 2 : Rajiv Gandhi Cancer Institute and Re…
18_Biological E_PCV.pdf .txt.csv	74616	CTRI/2022/11/047366 [Registered on: 16/11/2022] Trial Registered Prospectively	a single blind randomised active-controlled phase-iii study to evaluate immunogenicity, safety, tolerability of a candidate 14-valent pneumococcal polysaccharide conjugate vaccine administered to 6-8 weeks old indian infants at 6 weeks, 14 weeks and 9 months of age (2+1 alternative dosing schedule).	a single blind randomised active-controlled phase-iii study to evaluate immunogenicity, safety, tolerability of a candidate 14-valent pneumococcal polysaccharide conjugate vaccine administered to 6-8 weeks old indian infants at 6 weeks, 14 weeks and 9 months of age (2 plus 1 alternative dosing schedule).	0.97377	Pneumococcal Polysaccharide Conjugate Vaccine (Adsorbed) (14 Valent).	Pneumococcal polysaccharide Conjugate Vaccine (Adsorbed) (14 Valent) (With Preservative)- Multi Human dose- 2.5mL	4. New Delhi, 08-SEP-2022.	16/11/2022	provided in the prompt, differentiated in active and inactive ingredients.	Suspension for Intramuscular injection.	Dose:0.5 mL Two plus one dosing schedule 2. Frequency: three doses administered respectively, at Day 0, Day 56 & Day 270 (9 months) respectively. 3. Route of administration: Intramuscular injection in the vastus lateralis muscle on anterolateral aspect of thigh 4.Total duration of therapy: 300 days	For active immunization for the prevention of disease caused by Streptococcus pneumonia serotypes 1, 3, 4, 5, 6B, 7F, 9V, 14, 18C, 19A, 19F, 22F, 23F and 33 F in infants ages 6-8 weeks at first dose.	Preventive protection against Pneumococcal disease caused by the vaccine serotypes.	provided in the prompt, including the names and addresses, ethics committee details, ECR number beginning with 'ECR', and name of the investigator.	Site 1 : Cheluvamba Hospital Dept. of Paediatrics, ground floor, Cheluvamba Hospital Mysore Medical College & Research Institute, Irwin Road Mysore-570001MysoreKARNATAKA. Name of principal investigator: Dr Pradeep. Site 2 : Guru Teg Bahadur Hospital & UCMS Dept. of Paediatrics, 6th floor, MCH Block, Dilshad Garden Shahdara, Delhi - 110095North EastDELHI. Name of principal investigator: Dr Manish …
Sr. no. 53 CT-59-21-Novartis.pdf .txt.csv	54954	CTRI/2021/11/038171 [Registered on: 22/11/2021] Trial Registered Prospectively	a 2-year randomized, 3-arm, double-blind, non-inferiority study comparing the efficacy and safety of ofatumumab and siponimod versus fingolimod in pediatric patients with multiple sclerosis followed by an open-label extension.	a 2-year randomized, 3-arm, double-blind, non-inferiority study comparing the efficacy and safety of ofatumumab and siponimod versus fingolimod in pediatric patients with multiple sclerosis followed by an open-label extension	0.973684	Ofatumumab (OMB15and Siponimod (BAF312).	(BAF312) as film-coated tablet	4. New Delhi, and the date is not specified in the prompt.	22/11/2021	: - Ofatumumab (OMB157) = 20.0000 mg/0.4ml (Active) - Siponimod (BAF312) = 0.1000 milligram (mg) (Active) - Siponimod (BAF312) = 0.2500 milligram (mg) (Active) - Siponimod (BAF312) = 0.5000 milligram (mg) (Active) - Siponimod (BAF312) = 1.0000 milligram (mg) (Active) - Siponimod (BAF312) = 2.0000 milligram (mg) (Active)	OMB157 Solution for injection and BAF312 Film coated tablet.	1 mg or 2 mg tablet administered once daily for 3 years.	pediatric patients with multiple sclerosis.	(1) ICD-10 Condition: G35||Multiple sclerosis,	are : 1. Room No. 14 IVth Floor, Old Building, Sir Ganga Ram Hospital, Sir Ganga Ram Hospital Marg, Rajinder Nagar, New Delhi-110060, Ethics committee details: Sir Ganga Ram Hospital Ethics Committee, Room No. 1496, IVth Floor, Old Building, Sir Ganga Ram Hospital, Rajinder Nagar, New Delhi-110060, ECR/20/Inst/DL/2013/RR-19, Name of investigator: Dr. Anshu Rohatgi. 2. Max Super Speciality Hospita…	Site 1 : Amrita Institute of Medical Sciences Ponekkara, Kochi, 682041 Kerala IndiaKozhikodeKERALA. Name of principal investigator: DrVinayan KP. Site 2 : Institute of Neurosciences Dept of Neurology,Kolkata, 185/1 AJC BOSE ROAD,Kolkata 700017 KolkataWEST BENGAL. Name of principal investigator: Dr Hrisikesh Kumar. Site 3 : MAX SUPERSPECIALITY HOSPITAL Dept of Neurology,Saket West Block, 1 PRESS E…
Sr. No. 26 CT-167-21-Ctnoc.pdf .txt.csv	65731	CTRI/2022/07/044357 [Registered on: 26/07/2022] Trial Registered Prospectively	: “sakurabonsai: clinical, imaging and biomarker open-label study in neuromyelitis optica spectrum disorder (nmosd) with satralizumab as an intervention”.,	sakurabonsai: clinical, imaging and biomarker open-label study in neuromyelitis optica spectrum disorder (nmosd) with satralizumab as an intervention	0.973684	: Satralizumab Injection 120 mg/ml pre-filled syringe (PFS) with needle safety device (NSD).,	Satralizumab	: New Delhi, date not specified.,	26/07/2022	is: Satralizumab = 120mg/syringe (active), Poloxamer 188 = 0.5mg/syringe (inactive), L-Arginine = 26.1mg/syringe (inactive), L-Aspartic Acid = 0.0 qs to pH6/syringe (inactive), L-Histidine = 3.1 mg/syringe (inactive), Water for Injection = 0.0 qs to 1mL/syringe (inactive).,	: Ready-to-use sterile solution for subcutaneous (SC) injection in a single-dose, prefilled syringe (PFS) with needle safety device (NSD).,	Dose- 120mg _x000D_ Frequency- Weeks 0, 2 (±3 days), 4 (±3 days), and then every 4 weeks (±3 days) till the last administration at Week 92 _x000D_ Route of Administration- Subcutaneous (SC) _x000D_ Duration of Therapy- 92 Weeks	: For patients with Neuromyelitis Optica Spectrum Disorder (NMOSD).,	(1) ICD-10 Condition: G379||Demyelinating disease of central nervous system, unspecified,	: \n1. Lata Mangeshkar Medical Foundation's, Deenanath Mangeshkar Hospital & Research Centre, Off Karve Road, Erandawane, Pune – 411004, Maharashtra, India. Ethics committee details: Institutional Ethics Committee Department of Research, 146 Floor, C-Wing, Super Specialty Building, Deenanath Mangeshkar Hospital and Research Centre, Off Karve Road, Erandawane, Pune - 411004, Maharashtra, India. EC…	Site 1 : Lata Mangeshkar Medical Foundations Deenanath Mangeshkar Hospital and Research Centre 2nd floor, Neurology Dept, Off Karve Road,Erandawane, Pune, 411004 Pune MAHARASHTRAPuneMAHARASHTRA. Name of principal investigator: Dr Rahul Kulkarni
31 Ct-14-21-parexel.pdf .txt.csv	53300	CTRI/2021/04/032791 [Registered on: 13/04/2021] Trial Registered Prospectively	a randomised, double-blind, placebo-controlled, phase iii trial to determine the efficacy and safety of inhaled sng001 for the treatment of patients hospitalised due to moderate covid-19.	a randomized, double-blind, placebo-controlled, phase iii trial to determine the efficacy and safety of inhaled sng001 for the treatment of patients hospitalized due to moderate covid-19	0.973545	Interferon beta-1a.	SNG001	4. Place: New Delhi, Date: Not mentioned.	13/04/2021	Interferon beta-1a =31.2000 micrograms (μg) In House Specification Active.	Dosage form: Aqueous nebuliser solution.	SNG001 nebuliser solution, 2 syringes each containing 0.65 mL. Patients will inhale study medication once a day for 14 days	Indications: Moderate COVID-19.	(1) ICD-10 Condition: B972||Coronavirus as the cause of diseases classified elsewhere,	Details of clinical trial sites: - M S Ramaiah Medical College & Hospitals, M S Ramaiah Nagar, MSRIT Post, Bangalore-560054, Karnataka, India. Ethics Committee: M S Ramaiah Medical College & Hospitals, M S Ramaiah Nagar, MSRIT Post, Bangalore-560054,Karnataka, India. ECR/215/Inst/KA/2013/RR-19. Name of investigator: Dr. Anil Kumar T. - Clinical Research Room, Department of General Medicine, King …	Site 1 : Acharya Vinoba Bhave Rural Hospital Datta Meghe Institute Of Medical Sciences,SawangiWardhaMAHARASHTRA. Name of principal investigator: Dr Sunil Kumar. Site 2 : Fortis Hospitals Limited Level 5, Clinical research department, Mulund Goregaon Link Road, Bhandup (W),400078MumbaiMAHARASHTRA. Name of principal investigator: Dr Anita Mathew. Site 3 : Government Medical College and Hospital Dep…
66Novartis.pdf .txt.csv	44988	CTRI/2020/09/027575 [Registered on: 03/09/2020] Trial Registered Prospectively	a phase iii, randomized, controlled, open-label, multicenter, global study of capmatinib versus soc docetaxel chemotherapy in previously treated patients with egfr wt, alk negative, locally advanced or metastatic (stage iiib/iiic or iv) nsclc harboring met exon 14 skipping mutation (met∆ex14).	a phase iii, randomized, controlled, open-label, multicenter, global study of capmatinib versus soc docetaxel chemotherapy in previously treated patients with egfr wt, alk negative, locally advanced or metastatic (stage iiib/iiic or iv) nsclc harboring met exon 14 skipping mutation (metδex14)	0.972973	INC280 (Capmatinib).	Capmatinib (INC280)_x000D_ 150 mg or 200 mg	4. New Delhi, and the date is not mentioned in the prompt.	03/09/2020	active ingredient INC280 (Capmatinib) in two strengths: 150.0000 milligrams (mg) and 200.0000 milligrams (mg), as per In House Specification. The prompt does not mention any inactive ingredients.	a film-coated tablet.	Film-coated tablet, Oral use, Open-label participant specific;_x000D_ bottles	EGFR wt, ALK negative, locally advanced or metastatic (stage IIIB/IIIC or IV) NSCLC harboring MET exon 14 skipping mutation (MET∆ex14).	(1) ICD-10 Condition: C349||Malignant neoplasm of unspecifiedpart of bronchus or lung,	: - Noble Hospital Clinical Research Department, Noble Annex, Noble Hospital Pvt. Ltd. 153 A, Magarpatta City Road, Hadapsar, Pune - 411013, India. Ethics committee details: Noble Hospital Institutional Ethics Committee, Room No.5, Noble Hospital Clinical Research Department, Noble Annex, Noble Hospital Pvt.. Ltd. 153A, Magarpatta City Road, Hadapsar, Pune-411013, India. ECR/259/Inst/MH/2013/RR-1…	Site 1 : Christian Medical College, Department of Medical Oncology, Ida Scudder Road, Vellore - 632004, Tamil Nadu, IndiaVelloreTAMIL NADU. Name of principal investigator: Dr Ashish Singh. Site 2 : Indraprastha Apollo Hopsital, Sarita Vihar, Delhi-Mathura Road, New Delhi-110076New DelhiDELHI. Name of principal investigator: Dr Manish Singhal. Site 3 : Noble Hospital Clinical Research Department N…
Sr. No. 64 CT-29-22-Ms. AstraZeneca.pdf .txt.csv	68635	CTRI/2022/08/044748 [Registered on: 18/08/2022] Trial Registered Prospectively	a phase iii, randomized, double-blind, placebo controlled, multi-center, international study of durvalumab given concurrently with definitive chemoradiation therapy in patients with locally advanced, unresectable esophageal squamous cell carcinoma(kunlun).	a phase iii, randomized, double-blind, placebo controlled, multi-center, international study of durvalumab given concurrently with definitive chemoradiation therapy in patients with locally advanced, unresectable esophageal squamous cell carcinoma (kunlun)	0.972973	The names of the drug are Durvalumab (MEDI4736) and Placebo.	ARM A Durvalumab PLUS definitive Chemoradiation therapy (dCRT)	4. New Delhi and the date is not mentioned in the prompt.	18/08/2022	Durvalumab (MEDI4736), Histidine, α,α –Trehalose dehydrate, Histidine hydrochloride monohydrate, Polysorbate 80, and Water for Injection. The active and inactive ingredients are mentioned in the prompt.	Concentrate for solution for infusion.	ARM A Durvalumab Q4W will be administered concurrently with dCRT (cisplatin PLUS fluorouracil or cisplatin PLUS capecitabine and 50Gy-64 Gy). _x000D_ Patients without PD after completion of CRT will continue to receive durvalumab Q4W up to 24 months from the date of randomization. The treatment will stop at 24 months regardless of dose delay.	Locally Advanced, Unresectable Esophageal Squamous Cell Carcinoma (ESCC).	(1) ICD-10 Condition: C159||Malignant neoplasm of esophagus, unspecified,	mentioned in the prompt. The names and addresses of the clinical trial sites are HCG Cancer Center, Mumbai; MVR Cancer Centre and Research Institute, Kozhikode; Rajiv Gandhi Cancer Institute and Research Centre, New Delhi; HCG Cancer Center, Ahmedabad; Clinical Trial & Research Department, Bhagwan Mahaveer Cancer Hospital & Research Centre, Jaipur; HCG Cancer Centre, Vadodara; and Department of M…	Site 1 : BHAGWAN MAHAVEER CANCER HOSPITAL & RESEARCH CENTRE Department of Medical Oncology BHAGWAN MAHAVEER CANCER HOSPITAL & RESEARCH CENTRE Jawahar Lal Nehru Marg, Bajaj Nagar,PIN 302017JaipurRAJASTHAN. Name of principal investigator: Dr Deepak Gupta. Site 2 : HCG Cancer Centre, Ahmedabad. Department of Medical Oncology Near Sola Science City Road, Near Sola Bridge, Sola, Ahmedabad- PIN: 380060…
Sr. No. 45 Ct-29-21-Bayer.pdf .txt.csv	57370	CTRI/2021/07/034739 [Registered on: 09/07/2021] Trial Registered Prospectively	a phase 2 basket study of the oral trk inhibitor larotrectinib in subjects with ntrk fusion-positive tumors.	a phase 2 basket study of the oral trk inhibitor larotrectinib in subjects with ntrk fusion-positive tumors	0.972727	Larotrectinib.	Drug: BAY2757556 (Larotrectinib, Vitrakvi)	4. The place of the document is New Delhi and the date is not mentioned in the prompt.	09/07/2021	Larotrectinib sulfate, with active ingredients of 25.0000 milligram (mg), 100.0000 milligram (mg), and 20.0000 mg/ml.	Capsules and Oral Solutions.	Larotrectinib will be administered orally as capsule or liquid solution at a dose of 100 mg twice daily in continuing 28-days cycles.	for subjects with advanced cancer harboring a fusion of NTRK1, NTRK2, or NTRK3.	(1) ICD-10 Condition: D493||Neoplasm of unspecified behavior of breast,	: 1. SSB, Department of Medical Oncology, Jawaharlal Institute of Postgraduate Medical Education and Research (JIPMER), Dhanvanthri Nagar, Gorimedu, Puducheerry-605006, India. Ethics committee details: Institutional Ethics Committee Intervention Studies, Jawaharlal Institute of Postgraduate Medical Education and Research (JIPMER), First Floor, Administration block JIPMER campus Rd, Dhanvantari Na…	Site 1 : All India Institute of Medical Sciences Ansari Nagar New DelhiCentralDELHI. Name of principal investigator: Dr Haresh KP. Site 2 : Chittaranjan Cancer Research Institute 3rd Floor, Room No-303, Research Building, 37,S.P Mukherjee Road, Kolkata-700026. West Bengal, India. KolkataWEST BENGAL. Name of principal investigator: Dr Kalyan Kusum Mukherjee. Site 3 : HCG Manavata Cancer Centre Dep…
Sr. No. 34 CT-135-21-Pfizer.pdf .txt.csv	65754	CTRI/2022/04/041752 [Registered on: 08/04/2022] Trial Registered Prospectively	\a long-term, open-label follow-up study of tofacitinib for treatment of juvenile idiopathic arthritis (jia)\. ,	a long-term, open-label follow-up study of tofacitinib for treatment of juvenile idiopathic arthritis (jia)	0.972727	The name of the drug is Tofacitinib (CP-690,550). ,	Tofacitinib	of the document are New Delhi and not explicitly stated, respectively. ,	08/04/2022	Tofacitinib Citrate CP-690,550-10 (active ingredient), Xylitol, Purified Water, Sodium Benzoate, Sucralose, Lactic Acid, Hydrochloric Acid, and Flavor Grape (Natural 534732 T) (inactive ingredients). ,	Tablets and Oral Solutions. ,	5 mg BID oral, twice daily, tablet or solution In open-label phase: treatment with tofacitinib. Duration will be up to 120 weeks.	Juvenile Idiopathic Arthritis. ,	(1) ICD-10 Condition: M082||Juvenile rheumatoid arthritis withsystemic onset,	The details of the clinical trial sites include the names and addresses of the sites, ethics committee details, ECR numbers beginning with 'ECR', and names of the investigators. The sites are All India Institute of Medical Sciences in New Delhi, Sir Ganga Ram Hospital in New Delhi, Nirmal Hospital Pvt. Ltd. in Surat, IPME&R and SSKM Hospital in Kolkata, and Institute of Child Health in Kolkata. T…	Site 1 : All India Institute of Medical Sciences Division of Pediatric Rheumatology, Ansari Nagar, 110029, New Delhi, India New DelhiDELHI. Name of principal investigator: Dr Narendra Kumar Bagri. Site 2 : Institute of Child Health Department of Pediatrics Rheumatology, Dr Biresh Guha St, Park Circus, Ballygunge, Kolkata, West Bengal 700017, India KolkataWEST BENGAL. Name of principal investigato…
wockhardt insulin.pdf .txt.csv	60127	CTRI/2021/09/036601 [Registered on: 17/09/2021] Trial Registered Prospectively	\a randomized, single center, double blind, two-period, crossover glucose clamp study to test for bioequivalence between two recombinant human insulin analogues - wockhardt’s biphasic insulin aspart injection (30/70) and novomix® 30, in healthy subjects\ ,	a randomized, single center, double blind, two-period, crossover glucose clamp study to test for bioequivalence between two recombinant human insulin analogues - wockhardt’s biphasic insulin aspart injection (30/70) and novomix® 30, in healthy subjects	0.972656	Biphasic Insulin Aspart Injection IP 100 IU/mL (30% as soluble Insulin Aspart & 70% as Insulin Aspart Protamine crystals) and Novomix® 30. ,	Wockhardt’s Biphasic Insulin Aspart_x000D_ Injection (30/70) 100 IU/ml cartridges 3.0 ml	New Delhi, 28-Jun-2022. ,	17/09/2021	active ingredients such as Insulin Aspart (Recombinant) IP IU, and inactive ingredients such as Disodium hydrogen phosphate dihydrate USP/BP/Ph.Eur., Glycerol IP/USP/Ph.Eur., Zinc (as Zinc Chloride) IP/USP/Ph.Eur., m-Cresol USP/Ph.Eur., Phenol BP/IP/USP/Ph.Eur., Sodium Chloride IP/USP/Ph.Eur., Protamine Sulphate IP/USP/Ph.Eur., Sodium hydroxide IP/USP/Ph.Eur., Hydrochloric acid IP/USP/Ph.Eur., an…	Solution for Injection. ,	Trial products will be administered once at 0.3IU/Kg subject body weight.	Diabetes Mellitus. , The details of the clinical trial site include the name and address of the site, which is Clinical Pharmacokinetics & Biopharmaceutics, Department, Wockhardt Limited, D-4, MIDC Area, Chikalthana, Aurangabad, Maharashtra (India) -431006. The ethics committee details include the Institutional Ethics Committee, Dept. of Pharmacology, Govt. Medical College, Aurangabad-431001, Mah…	To test comparative efficacy of drugs used in diabetes mellitus	c("The full address of the person who has been granted permission to conduct this trial is M/s Wockhardt Limited, Research Centre, MIDC, D-4, MIDC, Chikalthana Aurangabad (India) - 431006. ",	Site 1 : Clinical Pharmacokinetics & Biopharmaceutics Department Wockhardt Limited Clinical Pharmacokinetics & Biopharmaceutics Department, Wockhardt Limited, D-4, MIDC Area,AurangabadMAHARASHTRA. Name of principal investigator: Dr Nilesh Lomte
12PharmOlam.pdf .txt.csv	41083	CTRI/2020/05/025104 [Registered on: 11/05/2020] Trial Registered Prospectively	a randomized double-blind placebo-controlled multicenter phase 3 study of efficacy and safety of ar-301 as adjunct therapy to antibiotics in the treatment of ventilator-associated pneumonia (vap) caused by s. aureus.	a randomized double-blind placebo controlled multicenter phase 3 study of efficacy and safety of ar-301 as adjunct therapy to antibiotics in the treatment of ventilator associated pneumonia (vap) caused by s aureus	0.972477	AR-301 (tosatoxumab).	AR-301	4. Place: New Delhi, Date: not specified.	11/05/2020	AR-301=25.0000 mg/ml in House Specification Active.	Parenteral Preparations.	AR-301 (KBSA301, tosatoxumab), is a human immunoglobulin G1 (IgG1) monoclonal antibody (mAb) specific for alpha-toxin of S. aureus. Single intravenous infusion of 20 mg of AR-301/kg of body weight (measured or estimated), up to a maximum dose of 2,500 mg (corresponding to 125 kg body weight), to be administered in approximately two hours	Ventilator-Associated Pneumonia (VAP) caused by S. aureus.	(1) ICD-10 Condition: A490||Staphylococcal infection, unspecified site,	: - Grant Medical Foundation, Ruby Hall Clinic 40, Sassoon Road, Pune-411001, Maharashtra, India; Institutional Ethics Committee, Poona Medical Research Foundation, E4-C to E4F, 4th Floor, 5th Avenue Condominium, Dhole Patil Road, Pune-411 001, Maharashtra, India; ECR/24/Inst/MH/2013/RR-19; Dr. Prachee Sathe - Apollo Hospitals, Jubilee Hills, Hyderabad – 500096, Telangana State, India; Institutio…	Site 1 : Apollo Hospitals Apollo Research and Innovation, Auditorium building, 1st floor, Apollo Medical College, Jubilee HillsHyderabadTELANGANA. Name of principal investigator: Dr Sai Praveen. Site 2 : Dayanand Medical College and Hospital Unit Hero DMC Heart Institute, Tagore NagarLudhianaPUNJAB. Name of principal investigator: Dr Vivek Gupta. Site 3 : Dr.Yogesh Agrawal Consultant Pulmonologis…
Sr. No. 47 CT-20-20-Novartis.pdf .txt.csv	41681	CTRI/2020/08/027253 [Registered on: 19/08/2020] Trial Registered Prospectively	a multicenter, double-blind, randomized withdrawal extension study of subcutaneous secukinumab to demonstrate long-term efficacy, safety and tolerability in subjects with moderate to severe hidradenitis suppurativa.	a multicenter, double-blind, randomized withdrawal extension study of subcutaneous secukinumab to demonstrate long-term efficacy, safety and tolerability in subjects with moderate to severe hidradenitis suppurativa	0.97235	Secukinumab.	Secukinumab- 300mg- solution for injection, Subcutaneous use, every 2 weeks (q2w) and every 4 weeks (q4w)._x000D_ Duration- 4 years	4. New Delhi, and the date is not mentioned in the prompt.	19/08/2020	AIN457 (Secukinumab) = 300.0000 mg / 2 ml In House Specification Active.	Solution for injection in pre-filled syringe.	Solution for_x000D_ injection; Subcutaneous use; every 2 weeks (q2w) and every 4 weeks (q4w)._x000D_ Duration- 4 years	subjects with moderate to severe hidradenitis suppurativa.	(1) ICD-10 Condition: L732||Hidradenitis suppurativa,	: 1. Sujata Birla Hospital & Medical Research Center, Opposite to Bytco College, Nashik Pune Highway, Nashik road, Nashik 422101, Maharashtra, India. Ethics committee details: Yash Society’s Sujata Birla Hospital Ethics Committee, C/O Sujata Birla Hospital & Medical Research Center, Opposite to Bytco College, Nashik Pune Highway, Nashik road, Nashik 422101, Maharashtra, India. ECR/98/Inst/MH/2013…	Site 1 : Assured Care Plus Hospital 4th & 5th Floor, Star Plus Complex, Near Muktidham Temple, Nashik road, Nashik 422101,Maharashtra, IndiaNashikMAHARASHTRA. Name of principal investigator: Dr Suneel Vartak. Site 2 : K R Hospital, Attached Mysore Medical College and Research Institute Department of Dermatology, Irwin Road, Mysore-570001, Karnataka, IndiaMysoreKARNATAKA. Name of principal investi…
80.pdf .txt.csv	70461	CTRI/2022/06/043399 [Registered on: 21/06/2022] Trial Registered Prospectively	: \a randomized, double blind, three-arm, parallel group, single dose comparative pk, pd, safety and immunogenicity study comparing adl-018 with us-licensed xolair and eu-approved xolair administered through subcutaneous route in healthy adult subjects.\,	a randomized, double blind, three-arm, parallel group, single dose comparative pk, pd, safety and immunogenicity study comparing adl-018 with us-licensed xolair and eu-approved xolair administered through subcutaneous route in healthy adult subjects	0.972332	Omalizumab (r-DNA origin) injection 150 mg/ml, and it is also referred to as ADL-018.,	Omalizumab (r-DNA origin) injection 150 mg/ml	4. : New Delhi, 23.05.2022.,	21/06/2022	: Omalizumab (r-DNA Origin) (ADL-018) 150 mg/mL, Sodium phosphate monobasic monohydrate USP 2.07 mg/mL, Sodium phosphate dibasic heptahydrate USP 1.34 mg/mL, L-Arginine Hydrochloride FCC (Food Chemicals Codex) 42.13 mg/mL, Poloxamer 188 (w/v) NF 0.4 mg/mL, Water for injection in-house q.s to 1.0 mL.,	subcutaneous injection (1 mL of PFS) (single-dose prefilled syringe).,	Kashiv Bioscience LLC, USA	: Moderate to severe persistent asthma in adults and pediatric patients of 6 years of age and older with a positive skin test or in vitro reactivity to a perennial aeroallergen and whose symptoms are inadequately controlled with inhaled corticosteroids. Nasal polyps in adult patients 18 years of age and older with inadequate response to nasal corticosteroids, as an add-on maintenance treatment. C…	Male or female, non-smoker (no use of tobacco or nicotine_x000D_ products within 3 months prior to dosing)	" : Synchron Research Services Pvt. Ltd., 1st and 2nd Floor, Swagat Plaza II, Iscon-Bopal Road, Ambli, Ahmedabad-380056, Gujarat, India. The ethics committee details are Sangini Hospital Ethics Committee C/o Sangini Hospital, 1st Floor, Santorini Square, B/h Abhishree Complex, Opp. Star Bazar, Nr. Jodhpur Cross Roads, Satellite, Ahmedabad-380015, Gujarat, India. The ECR number is ECR/147/Inst/GJ/…	Site 1 : Veeda Clinical Research Ltd. 1st, 2nd, 3rd and 4th Floor VEDANT Complex, Nr. Y.M.C.A. Club, S.G.Highway Road, Vejalpur, Ahmedabad 380051, Gujarat, IndiaAhmadabadGUJARAT. Name of principal investigator: Dr Anshul Attrey. Site 2 : Veeda Clinical Research Ltd. Office no. 9, 10 and 11 1st, 2nd and 3rd Floor, Radhe Palladium, Panchot, Mehsana, Gujarat- 384205, India.MahesanaGUJARAT. Name of p…
1Astraeneca.pdf .txt.csv	53176	CTRI/2021/03/032175 [Registered on: 19/03/2021] Trial Registered Prospectively	an open-label, multi-center, global study to evaluate long term safety and efficacy in patients who are receiving or who previously received durvalumab in other protocols (wave).	an open-label, multi-center, global study to evaluate long term safety and efficacy in patients who are receiving or who previously received durvalumab in other protocols - (wave)	0.972222	Durvalumab.	Durvalumab	4. The place of the document is New Delhi and the date is not mentioned.	19/03/2021	Durvalumab = 50.0000 mg/ml In House Specification Active.	Solution for infusion.	3 weekly cycle, IV infusion till PD	Non small cell lung cancer.	(1) ICD-10 Condition: C349||Malignant neoplasm of unspecifiedpart of bronchus or lung,	Details of the clinical trial site: - Name and address of clinical trial site: Apollo Speciality Hospital, No. 320, Padma Complex, Anna Salai, Chennai - 600035. - Ethics committee details: Institutional Ethics Committee-Clinical Studies, Apollo Hospital, #21, Greams lane, off Greams Road, Thousand lights, Chennai - 600006, Tamilnadu, India. ECR/37lInst/TN/2013/RR- I 6. - Name of the investigator:…	Site 1 : Apollo Speciality Hospital Dept. of Medical Oncology No: 320, Padma Complex, Anna Salai, Nandanam PIN- 600035ChennaiTAMIL NADU. Name of principal investigator: Dr Madras Ananthanarayanan Raja
Sr. No. 11 CT-125-22-PSI CRO.pdf .txt.csv	80411	CTRI/2023/05/052163 [Registered on: 01/05/2023] Trial Registered Prospectively	\a phase 2b, randomized, double-blind, placebo-controlled study to evaluate the safety and efficacy of 3 active dose regimens of morf-057 in adults with moderately to severely active ulcerative colitis (emerald-2).\ ,	a phase 2b, randomized, double-blind, placebo-controlled study to evaluate the safety and efficacy of 3 active dose regimens of morf-057 in adults with moderately to severely active ulcerative colitis (emerald-2)	0.972093	The name of the drug is \MORF-057.\ ,	MORF-057 capsule_x000D_ Alpha(4)beta(7) integrin inhibitor	of the document are \New Delhi\ and the date is not mentioned in the prompt. ,	01/05/2023	is \MORF-057 = 100.0000 milligram (mg) In House Specification Active.\ ,	\Capsules.\ ,	Induction: 200mg BID for 12 weeks._x000D_ Maintenance: 100 mg BID for 40 weeks	\Moderate to Sever Ulcerative Colitis.\ ,	(1) ICD-10 Condition: K519||Ulcerative colitis, unspecified,	as follows: ", "1. Fortis Hospital, B-22, Sector-62, Noida, Uttar Pradesh, 201301, India. Ethics committee details: Fortis Hospital Institutional Ethics Committee. ECR number: ECR/69/Inst/UP/2013/RR-20. Name of the investigator: Dr. Jatinder Singh Bhogal. ", "2. S.R. Kalla Memorial Gastro and General Hospital, 78-79 Dhuleshwar Garden, Behind HSBC Bank, Sardar Patel Marg, C-Scheme, Jaipur-302001, …	Site 1 : Dayanand Medical College & Hospital Tagore Nagar, Civil Lines, Ludhiana-141001, Punjab, IndiaLudhianaPUNJAB. Name of principal investigator: Dr Ajit Sood. Site 2 : Fortis Escorts Heart Institute Okhla road, Near Sukhdev Vihar Metro Station, New Delhi, 110025, IndiaNew DelhiDELHI. Name of principal investigator: Dr Pankaj Puri. Site 3 : Fortis Hospital B-22, Sector-62, Noida U.P, India - …
Sr. No. 67 Ct-176-21-Ms. Novartis.pdf .txt.csv	63940	CTRI/2022/09/045669 [Registered on: 19/09/2022] Trial Registered Prospectively	\a randomized, double-blind, double-dummy, parallel-group study, comparing the efficacy and safety of remibrutinib versus teriflunomide in participants with relapsing multiple sclerosis, followed by extended treatment with open-label remibrutinib\.,	a randomized, double-blind, double-dummy, parallel-group study, comparing the efficacy and safety of remibrutinib versus teriflunomide in participants with relapsing multiple sclerosis, followed by extended treatment with open-label remibrutinib	0.971888	LOU064 (Remibrutinib).,	Remibrutinib	4. New Delhi and the date is not mentioned in the prompt.,	19/09/2022	LOU064 = 100.0000 milligram (mg) In House Specification Active.,	a film-coated tablet.,	100 mg/ matching placebo Tablet 100 mg b.i.d. oral use (blinded) once daily	relapsing multiple sclerosis.,	(1) ICD-10 Condition: G35||Multiple sclerosis,	" :", "- Sir Ganga Ram Hospital, Sir Ganga Ram Hospital Marg, Rajinder Nagar, New Delhi-110060, India. Ethics committee details: Sir Ganga Ram Hospital Ethics Committee. ECR/20/Inst/DL/2013/RR-19. Name of investigator: Dr. Anshu Rohatgi.", "- Noble Hospital Clinical Research Department, Noble Annex, Noble Hospital Pvt. Ltd., 153A, Magarpatta City Road, Hadapsar, Pune-411013, Maharashtra, India. E…	Site 1 : Chopda Medicare & Research Centre Pvt Ltd, Magnum Heart Institute, 3/5, Patil Lane No 1, Laxmi Nagar, Near K B H Vidyalaya, Canada Corner, Nashik-422005,Maharashtra, India Chopda Medicare & Research Centre Pvt Ltd, Magnum Heart Institute, Clinical Research Department, Flat No 10, Laxmanrekha Apartment, Behind Magnum Heart Institute, Patil Lane No. 1, Canada Corner, Nashik- 422005, Mahara…
Sr. No. 59 CT-175-21-Ms. Novartis.pdf .txt.csv	63940	CTRI/2022/09/045669 [Registered on: 19/09/2022] Trial Registered Prospectively	a randomized, double-blind, double-dummy, parallel-group study, comparing the efficacy and safety of remibrutinib versus teriflunomide in participants with relapsing multiple sclerosis, followed by extended treatment with open-label remibrutinib.	a randomized, double-blind, double-dummy, parallel-group study, comparing the efficacy and safety of remibrutinib versus teriflunomide in participants with relapsing multiple sclerosis, followed by extended treatment with open-label remibrutinib	0.971888	LOU064 (Remibrutinib).	Remibrutinib	4. New Delhi and the date is not mentioned in the prompt.	19/09/2022	LOU064 = 100.0000 milligram (mg) In House Specification Active.	a film-coated tablet.	100 mg/ matching placebo Tablet 100 mg b.i.d. oral use (blinded) once daily	relapsing multiple sclerosis.	(1) ICD-10 Condition: G35||Multiple sclerosis,	provided in the Annexure. The names and addresses of the clinical trial sites are Max Super Speciality Hospital, Saket (West Block), 1, Press Enclave Road, New Delhi -110017, India; Shri Mahant Indiresh Hospital, Patel Nagar, Dehradun-248001, Uttarakhand; T.N. M. C & B.Y. L. Nair Ch. Hospital, OPD Building, 3rd Floor, EMG Room, T.N. M. C & B.Y. L. Nair Ch. Hospital, Dr. A.L. Nair Road, Mumbai Cen…	Site 1 : Chopda Medicare & Research Centre Pvt Ltd, Magnum Heart Institute, 3/5, Patil Lane No 1, Laxmi Nagar, Near K B H Vidyalaya, Canada Corner, Nashik-422005,Maharashtra, India Chopda Medicare & Research Centre Pvt Ltd, Magnum Heart Institute, Clinical Research Department, Flat No 10, Laxmanrekha Apartment, Behind Magnum Heart Institute, Patil Lane No. 1, Canada Corner, Nashik- 422005, Mahara…
01_Cadila_RUTI.pdf .txt.csv	41092	CTRI/2020/05/025421 [Registered on: 28/05/2020] Trial Registered Prospectively	double-blind, randomized, placebo-controlled phase iib clinical trial to investigate the efficacy of ruti® therapeutic vaccination as adjuvant of tuberculosis chemotherapy.	double-blind, randomized, placebo-controlled, phase iib clinical trial to investigate the efficacy of ruti® therapeutic vaccination as adjuvant of tuberculosis chemotherapy	0.971264	Inactivated Therapeutic Tuberculosis Vaccine (RUTI® Vaccine).	RUTI vaccine	4. Place: New Delhi, Date: 20-JAN-2020.	28/05/2020	The composition of the new drug, differentiated in the form of a list into active and inactive ingredients if possible, is as follows: - Active ingredient: FCMtb (33.30 μg per vial of lyophilized powder, 83.30 μg/ml per vial of reconstituted suspension) - Inactive ingredients: Sucrose (20,000.00 μg per vial of lyophilized powder, 50,000.00 μg/ml per vial of reconstituted suspension), Soy lecithin…	Powder (Lyophilized).	A dose of 25 μg of of RUTI vaccine will be given at week 1 (Cohort A-DS TB Patients) or month 1 (Cohort B-MDR TB Patients) after starting standard TB treatment.	Treatment of Drug susceptible Tuberculosis and Multidrug Resistant Tuberculosis.	(1) ICD-10 Condition: A150||Tuberculosis of lung,	: - Clinical Trial Site 1: Name and Address: All India Institute of Medical Sciences, Ansari Nagar, New Delhi - 110 029. Ethics Committee details: Institutional Ethics committee, Room No 102, First floor, Old O.T. Block, AIIMS, Ansari Nagar, New Delhi 110029, ECR/547/Inst/DL/2014/RR-17. Name of Principal Investigator: Dr. Randeep Guleria. - Clinical Trial Site 2: Name and Address: Department of M…	Site 1 : Agartala Government Medical College Tripura 799006West TripuraTRIPURA. Name of principal investigator: Dr Tapan Majumdar. Site 2 : All India Institute of Medical Sciences Ansari Nagar, New Delhi-11002New DelhiDELHI. Name of principal investigator: Prof Dipendra K Mitra
CT-01-2020.pdf .txt.csv	41092	CTRI/2020/05/025421 [Registered on: 28/05/2020] Trial Registered Prospectively	double-blind, randomized, placebo-controlled phase iib clinical trial to investigate the efficacy of ruti® therapeutic vaccination as adjuvant of tuberculosis chemotherapy.	double-blind, randomized, placebo-controlled, phase iib clinical trial to investigate the efficacy of ruti® therapeutic vaccination as adjuvant of tuberculosis chemotherapy	0.971264	Inactivated Therapeutic Tuberculosis Vaccine (RUTI® Vaccine).	RUTI vaccine	4. Place: New Delhi, Date: 20-JAN-2020.	28/05/2020	The composition of the new drug, differentiated in the form of a list into active and inactive ingredients if possible, is as follows: - Active Ingredient: FCMtb (33.30 μg per vial of lyophilized powder, 83.30 μg/ml per vial of reconstituted suspension) - Inactive Ingredients: Sucrose (20,000.00 μg per vial of lyophilized powder, 50,000.00 μg/ml per vial of reconstituted suspension), Soy lecithin…	Powder (Lyophilized).	A dose of 25 μg of of RUTI vaccine will be given at week 1 (Cohort A-DS TB Patients) or month 1 (Cohort B-MDR TB Patients) after starting standard TB treatment.	Treatment of Drug susceptible Tuberculosis and Multidrug Resistant Tuberculosis.	(1) ICD-10 Condition: A150||Tuberculosis of lung,	: - Clinical Trial Site 1: Name and Address: All India Institute of Medical Sciences, Ansari Nagar, New Delhi - 110 029. Ethics Committee Details: Institutional Ethics committee, Room No 102, First floor, Old O.T. Block, AIIMS, Ansari Nagar, New Delhi 110029, ECR/547/Inst/DL/2014/RR-17. Name of Principal Investigator: Dr. Randeep Guleria. - Clinical Trial Site 2: Name and Address: Department of M…	Site 1 : Agartala Government Medical College Tripura 799006West TripuraTRIPURA. Name of principal investigator: Dr Tapan Majumdar. Site 2 : All India Institute of Medical Sciences Ansari Nagar, New Delhi-11002New DelhiDELHI. Name of principal investigator: Prof Dipendra K Mitra
Sr.No. 137 Ct-141-21-AstraZeneca.pdf .txt.csv	66102	CTRI/2022/03/040954 [Registered on: 09/03/2022] Trial Registered Prospectively	\a phase iii, multicentre, randomised, double-blind, chronic-dosing, parallel-group, placebo-controlled study to evaluate the efficacy and safety of two dose regimens of medi3506 in participants with symptomatic chronic obstructive pulmonary disease (copd) with a history of copd exacerbations (oberon).\,	a phase iii, multicentre, randomised, double-blind, chronic-dosing, parallel-group, placebo-controlled study to evaluate the efficacy and safety of two dose regimens of medi3506 in participants with symptomatic chronic obstructive pulmonary disease (copd) with a history of copd exacerbations - oberon study	0.970684	MEDI3506.,	MEDI 3506	4. New Delhi and the date is not explicitly mentioned in the prompt.,	09/03/2022	MEDI3506 = 150.0000 mg/ml In House Specification Active. The prompt does not provide information on inactive ingredients.,	a solution for injection.,	Every 4 weeks + Maintenance inhaled therapy (ICS/LABA/LAMA)_x000D_ _x000D_ 52 weeks	Symptomatic Chronic Obstructive Pulmonary Disease (COPD) with a History of COPD Exacerbation.,	(1) ICD-10 Condition: J449||Chronic obstructive pulmonary disease, unspecified,	" provided in an annexure to the document. The names and addresses of the clinical trial sites are VMMC and Safdarjung Hospital, New Delhi-110029; Siddhi Hospital, Nashik-422007, Maharashtra, India; Criticare Hospital and Research Institute, Nagpur, Maharashtra, India-4400 The Calcutta Medical Research Institute, Kolkata-700027 West Bengal, India; Hindusthan Hospital, Coimbatore-641028 Tamil Nadu…	Site 1 : The Calcutta Medical Research Institute, Department of Pulmonary, 7 2 Diamond Harbour Road, PIN -700027 KolkataWEST BENGAL. Name of principal investigator: Dr Raja Dhar. Site 2 : Asthma Bhawan Department of Pulmonary ,R-3, Sector-6, Vidhyadhar Nagar, PIN -302039, JaipurRAJASTHAN. Name of principal investigator: Dr Ashish Kumar. Site 3 : Bhaktivedanta Hospital and Research Institute Bhakt…
CT-20-2020.pdf .txt.csv	46312	CTRI/2020/09/027674 [Registered on: 08/09/2020] Trial Registered Prospectively	an adaptive, seamless phase i, followed by a phase ii, randomized, multicenter study to evaluate the safety, reactogenicity, and immunogenicity of the whole virion inactivated sars-cov-2 virus vaccine, bbv152d administered intradermally in healthy volunteers.	an adaptive, seamless phase 1, followed by a phase 2, randomized, multicenter study to evaluate the safety, reactogenicity, and immunogenicity of the whole virion inactivated sars-cov- 2 virus vaccine, bbv152d administered intradermally in healthy volunteers.	0.969349	Whole Virion Inactivated Corona Virus Vaccine, BBV152D.	BBV152D	4. New Delhi, 20/08/2020.	08/09/2020	: - Active ingredient: Whole Virion, Inactivated Corona Virus antigen Strain: NIV-2020-770, 1.20 mcg - Inactive ingredients: 2-Phenoxyethanol (2PE) I.P. 0.5 mg, Phosphate Buffered Saline Qs to 0.1 ml	a liquid injection (intradermal route).	Dose :2 x 0.1 mL for arm 2 at day 0 and 14. Route of administration:Intradermal injection, Frequency:Two doses at Day 0 and Day 14	for active immunization against Corona Virus Disease (SARS-COV-2) COVID-19.	Active immunization for the prevention of SARS-CoV-2 infection	: - Site 1: ESI Hospital, Sanathnagar, Hyderabad, Telangana Ethics Committee details: Institutional Ethics Committee ESIC Medical College and Hospital, Sanath Nagar Hyderabad Telangana - 500038 Name of Principal Investigator: Dr. Rajiv Bandaru - Site 2: PGIMS, Rohtak, Haryana Ethics Committee details: Institutional Ethics committee, PGIMS, Rohtak, Haryana ECR number: ECR/293/Inst/HR/2013/RR-19 Na…	Site 1 : AIG Hospitals,Gachibowli,Hyderabad AIG Hospitals,CLINICAL RESESRACH DEPARTMENT ,FACILITY BLOCK,5TH FLOOR,136,PLOT NO 2/3/4/5 SURVEY ,1Mind space road,gachibowli,Hyderabad,Telanagana,500032HyderabadTELANGANA. Name of principal investigator: DrNChandrashekar. Site 2 : Meditrina Institute of Medical sciences,Nagpur 278,Meditrina Institute of Medical sciences,Central Bazar Road,Ramdaspeth,Na…
Sr.No. 93 CT-83-22-Ms. IRInnovate CTNOC.pdf .txt.csv	76147	CTRI/2022/12/048496 [Registered on: 26/12/2022] Trial Registered Prospectively	a randomized, double-blind clinical study of the efficacy and safety of bcd-201 (jsc biocad) and keytruda® in patients with unresectable or metastatic melanoma.	a randomized, double-blind clinical study of the efficacy and safety of bcd-201 (jsc biocad) and keytruda® in patients with unresectable or metastatic melanoma	0.969136	BCD-201.	Pembrolizumab (JSC BIOCAD,_x000D_ Russia), concentrate for solution for infusion, 25 mg/mL	4. New Delhi, and the date is not specified in the prompt.	26/12/2022	: BCD-201 25.0 mg (active), Trehalose dihydrate 80.0 mg (inactive), Glycine 1.5 mg (inactive), Poloxamer 188 1.0 mg (inactive), Histidine hydrochloride monohydrate 0.750 mg (inactive), Histidine 0.221 mg (inactive), Water for injections Up to 1.0 mL (inactive).	a concentrate solution for infusion.	administered intravenously at a dose of 200 mg once every 3 weeks for 24 weeks or until disease progression or unacceptable toxicity	Unresectable or Metastatic Melanoma.	(1) ICD-10 Condition: C439||Malignant melanoma of skin, unspecified,	provided in Annexure, which includes the names and addresses of the clinical trial sites, ethics committee details, ECR number beginning with 'ECR', and name of the investigator.	Site 1 : Acharya Vinoba Bhave Rural Hospital Sawangi Meghe, Wardha-442001, Maharashtra, IndiaWardhaMAHARASHTRA. Name of principal investigator: Dr Sameeksha Dubey. Site 2 : All India Institute of Medical Sciences,Bhubaneshwar All India Institute of Medical Sciences, Sijua, Patrapada Bhubaneshwar 751019 Odisha, IndiaKhordhaORISSA. Name of principal investigator: Dr Sourav Kumar Mishra. Site 3 : Ja…
Sr. No. 74 CT-41-21-Novartis.pdf .txt.csv	49651	CTRI/2022/03/041310 [Registered on: 23/03/2022] Trial Registered Prospectively	an adaptive, randomized, active-controlled, open-label, sequential cohort, multicenter study to evaluate the efficacy, safety, tolerability, and pharmacokinetics of intravenous cipargamin (kae609) in adult and pediatric participants with severe plasmodium falciparum malaria (karisma–kae609’s role in severe malaria).	an adaptive, randomized, active-controlled, open-label, sequential cohort, multicenter study to evaluate the efficacy, safety, tolerability, and pharmacokinetics of intravenous cipargamin (kae609) in adult and pediatric participants with severe plasmodium falciparum malaria (karisma – kae609’s role in severe malaria)	0.96904	KAE609 (CIPARGAMIN).	KAE609 20 mg	4. of the document are New Delhi and not mentioned.	23/03/2022	KAE609 =10.0000 mg/ml In House Specification Active.	Solution for injection or infusion.	Minimum of two doses; q24h (to be administered at 0 hour and 24 hours) and not exceeding three doses (Dose 3 at 48 hours) followed by oral medication (Coartem® bid for 3 days)	Severe Plasmodium Falciparum Malaria.	(1) ICD-10 Condition: B508||Other severe and complicated Plasmodium falciparum malaria,	: - Department of Paediatrics, All India Institute of Medical Sciences (AIIMS), Tatibandh, GE Road, RAIPUR-492099, Chhattisgarh. Ethics committee details: Institute Ethics Committee, AIIMS Raipur, Room No. 2103, 2nd Floor, South Wing, Medical College Complex, Gate No. 5, All India Institute of Medical Sciences Tatibandh, GE Road, Raipur-492099, Chhattisgarh. ECR number: ECR/2020/CR/011. - Nirmal …	Site 1 : All India Institute of Medical Sciences Department of pediatrics,GE ROAD,Tatibandh, Raipur 492099, Chhattisgarh IndiaRaipurCHHATTISGARH. Name of principal investigator: Dr Sunil Natha Jondhale. Site 2 : Community Welfare Society Hospital (CWSH) Northen Avenue Jagda Rourkela, 769042 Orissa IndiaSundargarhORISSA. Name of principal investigator: DrSanjib Mohanty. Site 3 : Nirmal Hospital PV…
CT-13-2020.pdf .txt.csv	44948	CTRI/2020/07/026930 [Registered on: 31/07/2020] Trial Registered Prospectively	a phase ii/iii, multicentric, randomized, single blind study to compare the immunogenicity and safety of measles and rubella vaccine (live) of hbi with mr-vac® vaccine in healthy subjects.	a phase ii/iii multicentric randomized single blind study to compare the immunogenicity and safety of measles and rubella vaccine (live) of hbi with mr-vac® vaccine in healthy subjects	0.968421	Measles and Rubella Vaccine (Live), I.P.	Measles and Rubella Vaccine (Live) of HBI	4. of the document are New Delhi and 12-JUNE-2020, respectively.	31/07/2020	: - Active ingredients: Measles virus ≥CCID50 per single human dose, Rubella virus ≥CCID50 per single human dose. - Inactive ingredients: D-Sorbitol 2.5% w/v, L-Alanine 0.4% w/v, Gelatin hydrolysate 1.25% w/v, L-Arginine Hydrochloride 3.2% w/v, Lactalbumin Hydrolysate 0.9% w/v, Maltose Monohydrate 2% w/v, WFI q. s. 0.5ml.	a lyophilized vaccine reconstituted with sterile water for injection (for subcutaneous injection).	0.5 ml single dose subcutaneously at the anterolateral aspect of the upper thigh for infants and toddlers and upper arm in older children and adults.	prophylaxis against Measles and Rubella.	Prevention of Measles and Rubella infection	: 1. Pediatric Research Cell, Department of Pediatrics, Bharati Vidyapeeth (Deemed to be University) Medical College & Hospital, Pune-Satara Road, Katraj-Dhankawadi, Pune-411043, Maharashtra, India. Ethics Committee details: Institutional Ethics Committee BVDU, Bharathi Vidyapeeth Hospital & Research Centre, Pune, ECR/313/Inst/MH/2013/RR-19. Name of Principal Investigator: Dr. Rahul Jahagirdar. 2…	Site 1 : Bharati Vidyapeeth (Deemed to be University) Medical College & Hospital Pediatric Research Cell, Department of Pediatrics, Bharati Vidyapeeth (Deemed to be University) Medical College & Hospital , Pune-Satara Road, Katraj-Dhankawadi, Pune-411043PuneMAHARASHTRA. Name of principal investigator: Dr Rahul Jahagirdar. Site 2 : Gandhi Medical College and Hospital Department of Pediatrics, Gand…
Sr. No. 70 CT-09-22-Cliantha.pdf .txt.csv	72741	CTRI/2022/08/044713 [Registered on: 17/08/2022] Trial Registered Prospectively	efficacy and safety of es16001 in patients with covid-19: a phase ii/iii multinational, randomized, parallel group, double-blind, placebo-controlled study.	efficacy and safety of es16001 in patients with covid-19: a phase ii/iii, multinational, randomized, parallel-group, double-blind, placebo-controlled study	0.968153	ES16001.	Oral Tablets of ES16001 40 mg, 80 mg, and 160 mg	4. of the document are New Delhi and not mentioned respectively.	17/08/2022	not fully mentioned in the prompt.	Tablets.	1. PHASE II (PART I )_x000D_ a). 480mg group : Three 80mg ES16001 tablets twice a day._x000D_ b). 720mg group : Two 160mg ES16001 tablets + One 40mg ES16001 tablets twice a day._x000D_ C). 960mg group : Three 160mg ES16001 tablets twice a day._x000D_ D). Control Group : Three placebo tablets twice a day._x000D_ E). PHASE III (PART II)_x000D_ F). Dose of ES16001 determined from the phase II._x000D…	Anti-Covid-19, therapeutics.	(1) ICD-10 Condition: B972||Coronavirus as the cause of diseases classified elsewhere,	mentioned in the Annexure of the document. The names and addresses of the clinical trial sites are Medstar Speciality Hospital, #641/17/1/3, Kodigehalli Main Road, Sahakarnagar, Bangalore-560092, Karnataka, India; Department of General Medicine, Nil Ratan Sircar Medical College and Hospital, 138 A.J. C. Bose Road, Kolkata-700014, West Bengal, India; Parth Hospital, E 405/4, 407-411, Galaxy Arcade…	Site 1 : Department of General Medicine Nil Ratan Sircar Medical College and Hospital Clinical Research Room, 1st floor- UNB building , Nil Ratan Sircar Medical college & Hospital, 138 A.J.C Bose Road, Kolkata 700014 West Bengal, IndiaKolkataWEST BENGAL. Name of principal investigator: Dr Badal Sahu. Site 2 : Lakshmi Nurshing Home Clincial Research Room, Ground floor, Lakshmi Nurshing Home , Pala…
Sr. No. 41 CT-152-21-Novo-Nordisk.pdf .txt.csv	62932	CTRI/2022/04/042104 [Registered on: 22/04/2022] Trial Registered Prospectively	effects of semaglutide on functional capacity in patients with type 2 diabetes and peripheral arterial disease (stride).	effects of semaglutide on functional capacity in patients with type 2 diabetes and peripheral arterial disease (stride)	0.967213	Semaglutide 1.34 mg/ml.	Semaglutide	4. Place: New Delhi, Date: not specified.	22/04/2022	Water for Injections, Sodium Hydroxide, Hydrochloric acid, Phenol, Propylene glycol, Disodium hydrogenphosphate, dihydrate, and Semaglutide. Semaglutide is the active ingredient.	Solution for injection.	Semaglutide is administered subcutaneously (s.c.; under the skin) once-weekly for 52 weeks in a dose escalating manner: 0.25 mg from week 1 to week 4, 0.5 mg from week 5 to week 8 and 1.0 mg from week 9 to week 52.	Type 2 Diabetes Mellitus and Peripheral Arterial Disease.	(1) ICD-10 Condition: E116||Type 2 diabetes mellitus with other specified complications,	provided in an annexure. The annexure includes the names and addresses of the clinical trial sites, ethics committee details, ECR numbers beginning with 'ECR', and names of the investigators.	Site 1 : Osmania Medical College and General Hospital Department of Cardiology, 15-5-104, Begum Bazar, Afzal Gunj, Hyderabad, Telangana - 500012.HyderabadTELANGANA. Name of principal investigator: Dr Krishna Mala Konda Reddy. Site 2 : S.P. Medical college & A G Hospitals Department of Cardiology, Bikaner, Rajasthan- 334003.BikanerRAJASTHAN. Name of principal investigator: Dr Devendra K Agarwal. S…
Sr. No. 33 CT-163-21-PPD.pdf .txt.csv	66960	CTRI/2022/04/042131 [Registered on: 25/04/2022] Trial Registered Prospectively	a phase 2, randomized, double-blind, placebo-controlled, dose-ranging trial to evaluate pharmacokinetics, pharmacodynamics, and safety of at-752 in patients with dengue infection.	a phase 2 randomized, double-blind, placebo-controlled, dose-ranging trial to evaluate pharmacokinetics, pharmacodynamics, and safety of at-752 in patients with dengue infection	0.966851	AT-752.	AT-752	4. New Delhi and the date is not mentioned in the prompt.	25/04/2022	AT-752 = 250.0000 milligram (mg) In House Specification Active.	Tablet.	Route of administration : _x000D_ Cohort 1: 750 m g AT-752/placebo TID for 5 days_x000D_ Cohort 2: up to 1000 m g AT-752/placebo BID or TID for 5 days_x000D_ Cohort 3: up to 1500 mg AT-752/placebo BID for 5 days _x000D_ Duration of therapy : 32 days	Treatment of Mild to Moderate Dengue.	(1) ICD-10 Condition: A90||Dengue fever [classical dengue],	: - S.No. 1: Names and address of clinical trial site: Down town Hospital, Dispur, GS Road, Guwahati-781006, Assam. Ethics committee details: Ethics Committee, Down town Hospital, Dispur, GS Road, Guwahati – 781006, Assam. Name of Investigator: Dr. Swapnav Borthakur. - S.No. 2: Names and address of clinical trial site: GSVM Medical College, Swaroop Nagar, Kanpur-208002, Uttar Pradesh. Ethics comm…	Site 1 : Down town Hospital Department of Medicine, 2nd floor of 3rd building, Down Townn Hospital, G. S. Road, Dispur, Guwahati, Assam, India-781006KamrupASSAM. Name of principal investigator: Dr Swapnav Borthakur. Site 2 : GSVM Medical College Department of Medicine, room no. 20, ground floor, GSVM Medical College, Swaroop Nagar, Kanpur, Uttar Pradesh, India-208002Kanpur NagarUTTAR PRADESH. Nam…
DART1.pdf .txt.csv	53212	CTRI/2021/04/032498 [Registered on: 01/04/2021] Trial Registered Prospectively	a double blind, placebo-controlled, multicentre study with an open-label extension to evaluate the efficacy and safety of 2'0 methyl antisense oligonucleotide in patients with duchenne muscular dystrophy.	a double blind, placebo-controlled, multicentre study with an open-label extension to evaluate the efficacy and safety of 2’o methyl antisense oligonucleotide in patients with duchenne muscular dystrophy	0.966019	2'0-Methyl-Phosphothioate Anti Sense ribonucleotide (2'OMePS RNA).	2 O Antisense Oligonucleotide	4. FDA Bhawan, Kotla Road, New Delhi-110002 Dated: 25 AUG 2020.	01/04/2021	mg of 2'0 Methyl Phosphothioate Antisense ribonucleotide (2'OMePS RNA) per Lyphophilised vial.	Lyophilized powder for Intravenous (IV) injection, to be reconstituted in aqueous phosphate buffer Saline.	Active Arm- 2 O antisense oligonucleotide plus current underlying standard of care	Duchenne muscular dystrophy (DMD).	(1) ICD-10 Condition: 3||Administration, (2) ICD-10 Condition: G710||Muscular dystrophy,	: - Dr. G.N Sanjeeva, Indira Gandhi Institute of Child Health, 1st Block, Siddapura, Jayanagar, Bengaluru, Karnataka 560029, Ethics Committee Name/Registration Number: Ethics Committee, Indira Gandhi Institute of Child Health, South Hospital Complex, Dharmaram, College Post Bengaluru, Karnataka 560029, ECR/441/InstlKA/2013/RR-16 - Dr. I C Verma, Sir Ganga Ram Hospital, Sarhadi Gandhi Marg, near B…	Site 1 : All India Institute of Medical Sciences Ansari NagarNew DelhiDELHI. Name of principal investigator: Dr Madhulika Kabra. Site 2 : Indra Gandhi Institute of Child Health South Hospital Complex, Dharamraj College Post Bengaluru-560029BangaloreKARNATAKA. Name of principal investigator: Dr Sanjeeva GN. Site 3 : PGIMER Chandigarh Madhya Marg, Sector 12, Chandigarh, 160012ChandigarhCHANDIGARH. …
Sr. No. 23 Ct-167-22-GCT Pharma.pdf .txt.csv	83692	CTRI/2023/04/051812 [Registered on: 20/04/2023] Trial Registered Prospectively	: “a 20-week multicenter, randomized, double-blind, placebo-controlled trial of epx-100 (clemizole hydrochloride) as adjunctive therapy in children and adult participants with dravet syndrome (argus trial)”.,	a 20-week multicenter, randomized, double-blind, placebo controlled trial of epx-100 (clemizole hydrochloride) as adjunctive therapy in children and adult participants with dravet syndrome (argus trial)	0.965854	The name of the drug is: EPX-100.,	EPX-100 (Clemizole Hydrochloride)	: New Delhi, date not specified.,	20/04/2023	is: EPX-90.0000 to 110.0000 % in House Specification Active Related Substances 0.1000 to 0.5000 % In House Specification Individual Impurity Related Substances 0.1000 to 3.0000 % In House Specification Total Impurity.,	: Oral Solutions.,	EPX-100 will be administered as an oral solution (5 mg/mL). Taste and color-matching placebo _x000D_ will be administered as an oral solution. Study drug will be administered daily in two divided doses _x000D_ (BID), 12 ± 2 hours apart. Study drug may be administered by mouth or tube.	: Seizures associated with Dravet Syndrome.,	(1) ICD-10 Condition: G408||Other epilepsy and recurrent seizures,	:", "1. IMS and SUM Hospital, Ground Floor, Sum Hospital Rd, Shampur, Bhubaneswar-751003, Odisha, India. Ethics committee details: IEC IMS and SUM Hospital, ECR/627/Inst/OR/2014/RR-20. Name of investigator: Dr Ajit Prasad Mishra.", "2. Central India Cardiology Hospital and Research Institute, Pioneer Co-Op Housing Society, Plot No 1, Gawande Lay Out, Nagpur - 440015, Maharashtra, India. Ethics co…	Site 1 : AIIMS Department of neurology, G. E. Road, Tatibandh, Raipur, Chhattisgarh -492099RaipurCHHATTISGARH. Name of principal investigator: Dr Atul Jindal. Site 2 : Amrita Institute of Medical Sciences & Research Center Department of neurology, AIMS Ponekkara P.O,Kochi-682041KozhikodeKERALA. Name of principal investigator: Dr Vinayan K P. Site 3 : Central India Cardiology Hospital and Research…
Sr. No. 113-CT-78-21-Medpace.pdf .txt.csv	62394	CTRI/2022/01/039298 [Registered on: 10/01/2022] Trial Registered Prospectively	\randomized, double-blind, placebo-controlled, phase 3 study to evaluate the long-term efficacy and safety of lib003 in patients with cardiovascular disease, or at high risk for cardiovascular disease, on stable lipid-lowering therapy requiring additional low-density lipoprotein cholesterol reduction (liberate-hr)\.,	randomized, double-blind, placebo-controlled, phase 3 study to evaluate the long-term efficacy and safety of lib003 in patients with cardiovascular disease, or at high risk for cardiovascular disease, on stable lipid-lowering therapy requiring additional low-density lipoprotein cholesterol reduction (liberate-hr)	0.965839	\LIB003\.,	LIB003	\Place: New Delhi, Date: not specified\.,	10/01/2022	is \LIB003 = 250.0000 mg/ml U.S.P. Inactive\.,	\Sterile solution for injection\.,	Study drug (LIB003 or placebo) will be administered by SC injection in either the abdomen, thigh or upper arm (which may be rotated) on Day 1 and Weeks 4, 8, 12, 16, and 20	\Low-density lipoprotein cholesterol (LDL-C) patients with atherosclerotic cardiovascular (CV) disease (ASCVD), high risk of ASCVD, or homozygous familial hypercholesterolemia (HoFH) or heterozygous familial hypercholesterolemia (HeFH) without CV disease (CVD) who required additional LDL C reduction\.,	(1) ICD-10 Condition: I251||Atherosclerotic heart disease of native coronary artery, (2) ICD-10 Condition: E780||Pure hypercholesterolemia, (3) ICD-10 Condition: E11||Type 2 diabetes mellitus,	as follows:", "- Indraprastha Apollo Hospital, Sarita Vihar, Mathura Road, New Delhi-110076. Ethics committee details: Institutional Ethics Committee-Clinical Studies, Indraprastha Apollo Hospital, Sarita Vihar, Mathura Road, New Delhi-110076. ECR number: ECR/5/Inst/DL/2013/RR-19. Name of the investigator: Dr. Raman Puri.", "- Department of Cardiology, G.B. pant Institute of Postgraduate Medical …	Site 1 : Sanjay Gandhi Postgraduate Institute of Medical Sciences Department of Cardiology,Sanjay Gandhi Postgraduate Institute of Medical Sciences, Raebareli Road , Lucknow 226014 LucknowUTTAR PRADESH. Name of principal investigator: Dr Aditya Kapoor. Site 2 : Care Institute of Medical Sciences " Near. Shukan Mall, Off. Science City Road, Sola , Ahmedabad-38060, Gujarat, India" AhmadabadGUJARAT.…
11AstraZeneca.pdf .txt.csv	48758	CTRI/2021/03/031930 [Registered on: 11/03/2021] Trial Registered Prospectively	a phase ii, multicenter, open-label study to evaluate the efficacy and safety of trastuzumab deruxtecan (t-dxd, ds-8201a) for the treatment of selected her2-expressing tumors (destiny-pantumor02).	a phase ii, multicenter, open-label study to evaluate the efficacy and safety of trastuzumab deruxtecan (t-dxd, ds-8201a) for the treatment of selected her2-expressing tumors. destiny-pantumor02	0.964646	Trastuzumab Deruxtecan.	Trastuzumab Deruxtecan	4. New Delhi, with no specific date mentioned.	11/03/2021	Trastuzumab Deruxtecan = 100.0000 mg/vial. No inactive ingredients are mentioned.	vials.	Dose: 5.4 mg/kg_x000D_ Frequency: every 3 weekly cycle_x000D_ Route of administration: IV infusion _x000D_ Duration of treatment: The number of treatment cycles with T-DXd is not fixed. Upon commencing study treatment, patients will continue receiving T-DXd until RECIST v1.1 disease progression, withdrawal of consent or any of the discontinuation criteria are met	the treatment of selected HER2-expressing tumors.	(1) ICD-10 Condition: D499||Neoplasm of unspecified behavior of unspecified site,	: - Tata Memorial Hospital, 3rd Floor, Homibhabha Building, Room Number 323, Dr Ernest Borges Road, Parel, Mumbai-4000 Maharashtra, India. Ethics committee details: Institutional Ethics Committee, 3rd Floor, Main Building, Dr Ernest Borges Road, Parel, Mumbai-4000 Maharashtra, India. ECR number: ECR/170/Inst/MH/2013/RR-19. Name of investigator: Dr. Vikas Sureshchand Ostwal. - Artemis Hospital, Se…	Site 1 : Artemis Hospital Dept. of Medical Oncology Chief of Medical Oncology Sector 51, PIN– 122001 GurgaonHARYANA. Name of principal investigator: Dr Hari Goyal. Site 2 : HCG Manavata Cancer Centre Behind Shivang Auto, Mumbai Naka, PIN -422002NashikMAHARASHTRA. Name of principal investigator: Dr Shruti Kate. Site 3 : Kokilaben Dhirubhai Ambani Hospital and Medical Research Institute Dept. of Me…
sr. No. 104 CT-112-21-Syngene.pdf .txt.csv	62671	CTRI/2021/12/038577 [Registered on: 10/12/2021] Trial Registered Prospectively	\a phase 2 randomized, double-blind, placebo-controlled trial and open label extension to evaluate the safety and efficacy of deupirfenidone (lyt-100) in post-acute covid-19 respiratory disease\. ,	a phase 2 randomized, double-blind, placebo-controlled trial and open-label extension to evaluate safety and efficacy of deupirfenidone (lyt-100) in post-acute covid-19 respiratory disease.	0.964103	Deupirfenidone Capsules (LYT-100) 250mg. ,	Deupirfenidone Capsules	New Delhi and the date is not explicitly stated in the prompt. ,	10/12/2021	is Deupirfenidone = 250.0000 milligram (mg) In House Specification Active. The prompt does not provide information on inactive ingredients. ,	Capsules. ,	(LYT-100) 250 mg_x000D_ Dose: 250 mg _x000D_ Frequency: 500 mg and 750 mg BID_x000D_ Route of administration: Oral _x000D_ Duration of therapy: _x000D_ Day 1 to Day 3: LYT-100 500 mg BID or matching Placebo x 3 days_x000D_ _x000D_ Day 4 through Day 91: LYT-100 750 mg BID or matching Placebo x 88 days_x000D_ _x000D_ Day 91 through Day 93: 1LYT-100 500 mg BID x 3 days_x000D_ _x000D_ Day 94 through …	Corona Virus Disease-19. ,	(1) ICD-10 Condition: B972||Coronavirus as the cause of diseases classified elsewhere,	provided in an annexure. The names and addresses of the clinical trial sites are Father Muller Medical College Hospital, Father Muller Road, Kankanady, Mangalore-575002; St. George's Hospital, P'D Mello Road, Fort Road, CST Terminal, Mumbai-400001; and PCMC'S PGI Yashwantrao Chavan Memorial Hospital, 2nd Floor General Medicine Department PCMC'S PGI Yashwantrao Chavan Memorial Hospital, Sant Tukar…	Site 1 : Father Muller Medical College Hospital Staff Room , Department of General Medicine, 6th Floor, General Ward Building, Father Muller Medical College Hospital Kankanady, Mangalore-575002Dakshina KannadaKARNATAKA. Name of principal investigator: Dr Archana Bhat. Site 2 : JSS Hospital Mysore CDSA-Center For Clinical Research Excellence, Room Number 2222, Master Health Check Area, 2nd Floor, …
Sr.No. 92 CT-79-22-Ms. IRInnovate-CTNOC.pdf .txt.csv	75973	CTRI/2022/12/048223 [Registered on: 19/12/2022] Trial Registered Prospectively	\a double-blind placebo-controlled comparative randomized clinical study of the efficacy and safety of bcd-217 (nurulimab + prolgolimab) followed by antipd-1 compared to anti-pd-1 monotherapy as first-line treatment in subjects with unresectable/metastatic melanoma\. ,	a double-blind placebo-controlled comparative randomized clinical study of the efficacy and safety of bcd-217 (nurulimab + prolgolimab) followed by anti- pd-1 compared to anti-pd-1 monotherapy as first-line treatment in subjects with unresectable/metastatic melanoma	0.9631	\Nurulimab\ and \Prolgolimab\ and the new drug is referred to as \BCD-217\. ,	BCD217	\Place: New Delhi, Date: not specified\. ,	19/12/2022	is as \Total high molecular Impurities<5.0000 %\, \Non-Glycosylated Heavy Chain Impurities <2.0000 %\, \Bacterial Endotoxins <3.3000Eu/ml\, and \Ion Exchange HPLC Assay90.0000 to110.0000 %\. ,	\Vials\. ,	Dose: 0.2 mL/kg, which is equivalent to 1 mg/kg nurulimab + 3 mg/kg prolgolimab_x000D_ Method of administration: as an intravenous infusion once every 3 weeks (Q3W) simultaneously with placebo, a total of 4 intravenous infusions. Beginning with the 5th infusion, subjects are switched to prolgolimab monotherapy once every 2 weeks (Q2W)._x000D_ Duration of treatment: 12 months (main period) + 12 mo…	\Unresectable / Metastatic Melanoma\. ,	(1) ICD-10 Condition: C439||Malignant melanoma of skin, unspecified,	provided in an annexure. The names and addresses of the clinical trial sites are Tata Memorial Hospital, Dr. Ernest Borges Road, Parel, Mumbai-400012, Maharashtra; Deenanath Mangeshkar Hospital and Research Center, Erandwane, Pune, Maharashtra-411004; All India Institute of Medical Science, Sri Aurobindo Marg, Ansari Nagar, Ansari Nagar East, New Delhi, Delhi-110029; Kiran Multispeciality Hospita…	Site 1 : All India Institute of Medical Sciences Sri Aurobindo Marg, Ansari Nagar, Ansari Nagar East, New Delhi, Delhi 110029EastDELHI. Name of principal investigator: Dr Sameer Rastogi. Site 2 : Deenanath Mangeshkar Hospital & Research Centre Off Karve Road Erandawane Pune Pune Maharashtra - 411004 IndiaPuneMAHARASHTRA. Name of principal investigator: Dr Chetan Deshmukh. Site 3 : HCG Manavata Ca…
1_BBIL_COVID.pdf .txt.csv	65443	CTRI/2022/02/040065 [Registered on: 07/02/2022] Trial Registered Prospectively	a phase iii randomized open label multi-center study to compare immunogenicity and safety of bbv154 with covaxin®, and to assess lot to lot consistency of bbv154 in healthy volunteers.	a phase iii randomized open label multi-center study to compare immunogenicity and safety of bbv154 with covaxin®, and to assess lot to lot consistency of bbv154 in healthy volunteers	0.962567	Chimpanzee Adenovirus Vectored COVID-19 Vaccine (BBV154) and COVAXIN®.	BBV154 INTRANASAL_x000D_ VACCINE	4. New Delhi, 27.01.2022.	07/02/2022	: - Active ingredient: Chimpanzee adenovirus 36 encoding SARS-CoV-2 pre-fusion stabilized spike protein (ChAd36-SARS-CoV-S) NLT 5x1010virus particles per mL - Inactive ingredients: Tris-HCl (pH 7.4) 20mM, Sodium Chloride 25mM, Magnesium Chloride 2mM, Glycerol 2.5%, Polysorbate-80 0.1%.	liquid for intranasal route of administration.	Replication deficient Adenoviral vector-based (expressing a stabilized spike protein) SARS-CoV-2 vaccine (BBV154) administered 0.5ml of vaccine on day 0 and day 28 via intra-nasal route using a dropper	for active immunization against Corona Virus Infections (COVID-19) caused by SARS-CoV-2.	Healthy Volunteers	: - Aatman Hospital, 5, Anveshan Row House, Bopal Gam BRTS, Bopal-Ghuma Road, Bopal, Ahmedabad-380058, Gujarat, India. Ethics Committee details: Institutional Ethics Committee, Aatman Hospital, 5, Anveshan Row House, Bopal Gam BRTS, Bopal-Ghuma Road, Bopal, Ahmedabad-380058, Gujarat, India. ECR/1565/Inst/GJ/202. Name of Principal Investigator: Dr Chintan B Patel. - All India Institute of Medical …	Site 1 : Aatman Hospital floor 1, room no - 5, Anveshan Row House, Bopal Gam BRTS, Bopal-Ghuma Road, Bopal, Ahmedabad-380058, Gujarat, IndiaAhmadabadGUJARAT. Name of principal investigator: Dr Chintan B Patel. Site 2 : Acharya Vinobha Bhave Rural Hospital Pediatric Department, Jawaharlal Nehru medical college, room no - 203, Sawangi (Meghe), Wardha-442004WardhaMAHARASHTRA. Name of principal inves…
Sr. No. 85 Ct-50-21-GSK.pdf .txt.csv	56195	CTRI/2021/10/037383 [Registered on: 20/10/2021] Trial Registered Prospectively	\a phase iii, double-blind, randomized, placebo-controlled study to evaluate the safety, reactogenicity and immune response of a single intramuscular dose of unadjuvanted rsv maternal vaccine, in high risk pregnant women aged 15 to 49 years and infants born to the vaccinated mothers\.,	a phase iii, double-blind, randomized, placebocontrolled study to evaluate the safety, reactogenicity and immune response of a single intramuscular dose of unadjuvanted rsv maternal vaccine, in high risk pregnant women aged 15 to 49 years and infants born to the vaccinated mothers.	0.961672	Respiratory Syncytial Virus (RSV) Maternal (RSVPreF3) Vaccine.,	Respiratory Syncytical Virus (RSV) Maternal (RSVPreF3) vaccine	4. New Delhi and the date is not mentioned.,	20/10/2021	Polysorbate 80, NaCl, Potassium phosphate dibasic K2HPO4, Trehalose, Potassium phosphate monobasic KH2PO4, WFI, and RSVPreF3. Polysorbate 80, NaCl, Potassium phosphate dibasic K2HPO4, Trehalose, and Potassium phosphate monobasic KH2PO4 are inactive ingredients, while RSVPreF3 is an active ingredient.,	Powder and solvent for solution for injection.,	Dose - Single Dose_x000D_ Route of administration - Intramuscular Route _x000D_ Site - deltoid region of no dominant arm_x000D_ Duration of therapy - 557 days . Maternal Participants to be followed up upto 181 days post delivery and Infants to be followed up for 366 days post birth	active immunization of high risk pregnant women during the second and third trimester of pregnancy to prevent Respiratory Syncytial Virus (RSV) associated lower respiratory tract illness(LRTI) in infants by transfer of maternal antibodies.,	(1) ICD-10 Condition: O09||Supervision of high risk pregnancy,	" The details of the clinical trial sites include the names and addresses, ethics committee details, ECR number beginning with 'ECR', and name of the investigator. The sites are All India Institute of Medical Sciences, Bhubaneswar, KEM Hospital Research Centre Sardar Moodliar Road, Rasta Peth, Pune, Atal Bihari Vajpayee Institute of Medical Sciences and Ram Manohar Lohia Hospital, New Delhi, and …	Site 1 : All India Institute of Medical Sciences Dept. of Community Medicine and Family Medicine, Sijua, Po-Dumduma, BhubaneshwarKhordhaORISSA. Name of principal investigator: Dr Arvind Kumar Singh. Site 2 : All India Institute of Medical Sciences,Nagpur, Plot No 2, Sector 20, Mihan Nagpur, 441108. NagpurMAHARASHTRA. Name of principal investigator: DrShuchita Mundle. Site 3 : Bharati Vidyapeeth D…
76Eli Lilly.pdf .txt.csv	46330	CTRI/2020/11/029312 [Registered on: 24/11/2020] Trial Registered Prospectively	pediatric options for migraine relief: a randomized, double-blind, placebo-controlled study of lasmiditan for acute treatment of migraine: pioneer-peds1	pediatric options for migraine relief: a randomized, double-blind, placebo-controlled study of lasmiditan for acute treatment of migraine: pioneerpeds1”	0.961039	Name of the drug: Lasmiditan	Lasmiditan	4. Place: New Delhi, Date: Not mentioned	24/11/2020	Lasmiditan Hemisuccinate = 57.8200 milligram (mg) In House Specification (Active), Lasmiditan Hemisuccinate = 115.6400 milligram (mg) In House Specification (Active)	Dosage form: Tablets	Administered orally with matching placebo to maintain the blind. The study will last up to 20 weeks and may include up to 4 visits._x000D_ In pain High or Mid dose post 2 hours of dose according to age group.	Indications: Acute treatment of Migraine	(1) ICD-10 Condition: G431||Migraine with aura,	Details of clinical trial sites: - Sir Ganga Ram Hospital, SGRH Marg, Rajinder Nagar, New Delhi - 110060, India, Ethics committee details: Sir Ganga Ram Hospital Ethics Committee, ECR/20/INST/DL/2013/RR-2016, Name of investigator: Dr. Anshu Rohatgi - Artemis Hospitals, Sector-51, Gurgaon – 001, Haryana, India, Ethics committee details: Artemis health Sciences-Institutional Ethics Committee Artemi…	Site 1 : All India Institute of Medical Sciences Plot no. 2, Sector 20, 2nd Floor, Room no. 226, Department of Pediatrics, Sumantha, Mihan, Nagpur, 441108 – Maharashtra, IndiaNagpurMAHARASHTRA. Name of principal investigator: Dr Meenakshi Girish. Site 2 : All India Institute of Medical Sciences (AIIMS) Department of Neurology, Room No. 3, VI Floor, Neurosciences Centre, AIIMS. Ansari Nagar New De…
Sr. No. 21 CT-150-21-Pfizer-CTNOC.pdf .txt.csv	64727	CTRI/2022/04/041982 [Registered on: 20/04/2022] Trial Registered Prospectively	an open-label, 3-arm, multicenter, randomized phase 3 study to evaluate the efficacy and safety of elranatamab (pf-06863135) monotherapy and elranatamab + daratumumab versus daratumumab + pomalidomide + dexamethasone in participants with relapsed/refractory multiple myeloma who have received at least 1 prior line of therapy including lenalidomide and a proteasome inhibitor.	an open-label, 3-arm, multicenter, randomized phase 3 study to evaluate the efficacy and safety of elranatamab (pf-06863135) monotherapy and elranatamab plus daratumumab versus daratumumab plus pomalidomide plus dexamethasone in participants with relapsed/refractory multiple myeloma who have received at least 1 prior line of therapy including lenalidomide and a proteasome inhibitor	0.960938	Elranatamab (PF-06863135).	Experimental: Part 2 Randomized Arm A: Elranatamab	4. New Delhi, and the date is not specified in the prompt.	20/04/2022	Water for Injection, Edetate Disodium (EDTA), Sucrose, Polysorbate 80, L-histidine Hydrochloride Monohydrate, Histidine (L-histidine), and PF-06863135. PF-06863135 is the active ingredient.	Solution for injection.	40 mg/mL solution for injection of Elranatamab administered subcutaneously. Total duration of therapy is 18.3 months.	the treatment of Multiple Myeloma.	(1) ICD-10 Condition: C900||Multiple myeloma,	provided in the Annexure. The names and addresses of the clinical trial sites are LMMF’s Deenanath Mangeshkar Hospital & Research Centre, Erandwane, Pune-411004; Artemis Hospital, Sector 51, Gurugram, Haryana, India-001; Adult Hematolymphoid, Department of Medical Oncology, Tata Memorial Hospital, Dr. E Borges Marg, Parel, Mumbai-4000 Maharashtra, India; Department of Medical Oncology & BMT, R.K …	Site 1 : Artemis Hospital Sector 51, Gurugram, Haryana 122001GurgaonHARYANA. Name of principal investigator: Dr Pawan Kumar Singh. Site 2 : Christian Medical College IDA Scudder Road, Vellore, Tamil Nadu - 632004VelloreTAMIL NADU. Name of principal investigator: Dr Vikram Mathews. Site 3 : LMMFs Deenanath Mangeshkar Hospital and Research Centre Gulawani Maharaj Road, Erandwane, Pandurang Colony, …
Sr. no. 10 Ct-129-21-Bharat Serum.pdf .txt.csv	65078	CTRI/2022/03/040842 [Registered on: 04/03/2022] Trial Registered Prospectively	a randomized, parallel-group multi-center, assessor-blind phase 3 study to compare the efficacy, safety and ease of use of two follicle stimulating hormone- human recombinant (r-hfsh) 900 iu (66.0 µg)/1.5 ml solution for injection in prefilled pen (foligraf®- manufactured by bsv and gonal-f® manufactured by merck serono) in subjects undergoing controlled ovarian stimulation for assisted reproduct…	a randomized, parallel-group, multi-center, assessor-blind phase 3 study to compare the efficacy, safety and ease of use of two follicle stimulating hormone -human recombinant (r-hfsh) 900 iu (66.0 µg) / 1.5ml solution for injection in prefilled pen (foligraf®- manufactured by bsv and gonal-f® manufactured by merck serono) in subjects undergoing controlled ovarian stimulation for assisted reprodu…	0.955399	Follicle Stimulating Hormone-Human Recombinant (r-hFSH) 900 IU (66.0 g) / 1.5mL Solution for Injection in Prefilled Pen	Foligraf_x000D_ 900 IU (66.0 µg) / 1.5mL Solution for Injection in Prefilled Pen	New Delhi and the date is not specified	04/03/2022	Water for Injection, Phosphoric acid, Meta-cresol, Polysorbate 20 (Tween 20), L-Methionine, Sucrose, Mannitol, Disodium hydrogen phosphate anhydrous, and Follicle Stimulating Hormone concentrated solution (Follitropin concentrated solution)(r-DNA origin)	Solution for Injection in Prefilled Pen	Follicle Stimulating Hormone (Human Recombinant) manufactured by Bharat Serums and Vaccines Ltd_x000D_ fixed dose of 225 IU/day, SC, daily, for 5 days. further dosage will be adjusted till adequate follicular development	Anovulation (including polycystic ovarian disease, PCOD) in women who have been unresponsive to treatment with clomiphene citrate and Stimulation of multi-follicular development in patients undergoing superovulation for assisted reproductive technologies (ART) such as in vitro fertilization (IVF), gamete intra-fallopian transfer (GIFT) and Zygote IntraFallopian Transfer (ZIFT)	(1) ICD-10 Condition: N97||Female infertility,	The details of the clinical trial sites include the names and address, ethics committee details, ECR number beginning with 'ECR', and name of the investigator. The clinical trial sites are Milann, (A Unit of BACC Healthcare Pvt. Ltd.) in Bangalore, Karnataka and All India Institute of Medical Sciences in New Delhi.	Site 1 : Om Research Center Om Surgical Center and Maternity Home SA-17/3, P-4, Sri Krishna Nagar Paharia, Ghazipur Road Varanasi - 221007 VaranasiUTTAR PRADESH. Name of principal investigator: Dr Shalini Shrivastava. Site 2 : RISAA IVF International Fertility Centre H-6, Green Park, 110016New DelhiDELHI. Name of principal investigator: Dr Rita Bakshi. Site 3 : Bavishi Fertility Institute Next to…
Sr. No. 63 CT-30-22-Ms. labcorp.pdf .txt.csv	71460	CTRI/2022/09/046087 [Registered on: 30/09/2022] Trial Registered Prospectively	\a phase iii double-blind, randomised, placebo-controlled study assessing the efficacy and safety of capivasertib + docetaxel versus placebo + docetaxel as treatment for patients with metastatic castration resistant prostate cancer (mcrpc)\.,	a phase iii double-blind, randomised, placebo-controlled study assessing the efficacy and safety of capivasertib plus docetaxel versus placebo plus docetaxel as treatment for patients with metastatic castration resistant prostate cancer (mcrpc)	0.954918	The name of the drug is Capivasertib. ,	Capivasertib, Docetaxel	New Delhi - 110002 and the date is not mentioned in the prompt. ,	30/09/2022	is Capivasertib = 160.0000 milligram(mg) In House Specification Active. The prompt does not mention any inactive ingredients. ,	Tablets. ,	Capivasertib:_x000D_ 320 mg (2 tablets) BD (Twice-daily) given orally on an intermittent weekly dosing schedule. Patients will be dosed on Days 2 to 5, 9 to 12, and 16 to 19 in each week of a 21-day treatment cycle._x000D_ Number of Cycles: until disease progression or unacceptable toxicity develops, death, or if the patient requests to stop the study treatment._x000D_ _x000D_ Docetaxel:_x000D_ P…	for the treatment of Prostate Cancer. ,	(1) ICD-10 Condition: C61||Malignant neoplasm of prostate,	as follows: ", "1. Dept. of Urology, Urasciences Centre S. P. Medical College & AG of Hospitals, Bikaner, Rajasthan-334003, India. Ethics Committee Details: ETHICS COMMITTEE, S.P. MEDICAL COLLEGE & AG OF HOSPITALS, BIKANER 334003, RAJASTHAN, INDIA (Institutional Review Board). ECR/27/SP/lnst/RJ/2013/RR-19. Name of Investigator: Dr. Mukesh C Arya. ", "2. Rajiv Gandhi Cancer Institute and Research …	Site 1 : HCG Manavata Cancer Centre Behind Shivang Auto, Mumbai Naka, Nashik-422002, Maharashtra, IndiaNashikMAHARASHTRA. Name of principal investigator: Dr Ranjish Nagarkar. Site 2 : Max Super Speciality Hospital (MSSH) Near Civil Hospital, Phase 6, Mohali, Punjab-160055, IndiaRupnagarPUNJAB. Name of principal investigator: Dr Gautam Goyal. Site 3 : Rajiv Gandhi Cancer Institute and Research Cen…
68.pdf .txt.csv	63714	CTRI/2022/01/039265 [Registered on: 07/01/2022] Trial Registered Prospectively	a randomized, single center, double blind, two-period, crossover glucose clamp study to test for bioequivalence between two recombinant human insulin analogues - wockhardt’s insulin aspart injection (100 iu/ml) and novorapid (100 units/ml), in healthy subjects.	a randomized, single center, double blind, two-period, crossover glucose clamp study to test for bioequivalence between two recombinant human insulin analogues - wockhardts insulin aspart injection (100 iu/ml) and novorapid® (100 units/ml), in healthy subjects	0.954545	Insulin Aspart Injection (r-DNA origin).	Wockhardts Insulin Aspart Injection_x000D_ (100 IU/ml) 3 ml cartridges of Wockhardt Ltd.	4. New Delhi, 30-Nov-2021.	07/01/2022	- Active ingredient: Insulin Aspart (r-DNA origin) 100.0 IU - Inactive ingredients: m-cresol 1.72mg, Phenol 1.50mg, Glycerol** 16.00mg, Zinc as Zinc Chloride* 0.0196mg, Sodium Hydroxide Q.S to pH, Hydrochloric acid Q.S to pH, Disodium Hydrogen Phosphate dihydrate 1.25mg, Sodium Chloride 0.58mg, Water for Injection Q.S to 1.0ml.	Solution for Injection.	Wockhardts Insulin Aspart Injection will be administered, at 0.3IU/Kg_x000D_ subject body weight.	Diabetes Mellitus.	Not Applicable	: - Name and Address of Clinical Trial Site: Clinical Pharmacokinetics & Biopharmaceutics, Department, Wockhardt Limited, D-4, MIDC Area, Chikalthana, Aurangabad, Maharashtra (India) -431006. - Ethics Committee Details: Institutional Ethics Committee, Dept. of Pharmacology, Govt. Medical College, Aurangabad-431001, Maharashtra, India, EC Reg. No. ECR/314/Inst/MH/2013/RR-19. - Name of Principal In…	Site 1 : Clinical Pharmacokinetics & Biopharmaceutics Wockhardt Limited Clinical Pharmacokinetics & Biopharmaceutics Department, Wockhardt Limited, D-4, MIDC Area,AurangabadMAHARASHTRA. Name of principal investigator: Dr Nilesh Lomte
1.BSV.pdf .txt.csv	51849	CTRI/2021/02/031566 [Registered on: 25/02/2021] Trial Registered Prospectively	a prospective, randomized, multi-center, open label, phase 1/2 study to evaluate the safety and efficacy of equine covid-19 antiserum [f(ab')2] (bsveqab) plus standard of care in comparison to standard of care alone in covid-19 rt-pcr positive patients.	a prospective, randomized, multi-center, open label, phase 1/2 study to evaluate the safety and efficacy of equine covid-19 antiserum [f(ab)2] (bsveqab) plus standard of care in comparison to standard of care alone in covid-19 rt-pcr positive patients (protect)	0.954023	Equine COVID 19 Antiserum (Liquid Injection).	Equine COVID-19 Antiserum [F(ab)2] (BSVEQAb)_x000D_ Along with Standard of care.	4. New Delhi and 19-JAN-2021.	25/02/2021	: - Active ingredient: Equine COVID19 Antiserum (source of COVID-19 antigen: M/s BSV Bioscience, Inc., United States) - 25 mg (NLT 1:10000) - Inactive ingredients: Sodium Chloride - 9 mg, Glycine - 3 to 4.5 mg, Water for injection - q.s. to 1.0 ml.	Solution for Infusion (IV route of administration).	Dose of BSVEQAb - 5 mg/kg or 10 mg/kg body weight. _x000D_ It is administered as a single dose intravenously after diluting in 100 -150 ml saline. The infusion will be done over 1 to 2 hours. _x000D_ Standard of care for treatment of COVID-19 positive patients	For use in treatment of COVID-19 infected patient.	(1) ICD-10 Condition: B972||Coronavirus as the cause of diseases classified elsewhere,	: - Clinical Trial Site 1: Jehangir Hospital, 32, Sassoon Road, Pune - 411 001 (For phase I & II clinical trial) Ethics Committee details: Ethics Committee, Jehangir, Clinical Development Centre Pvt. Ltd. Jehangir Hospital, 32, Sassoon Road, Pune - 411 001. ECR/352/INST/MH/2013/RR-19 Name of Principal Investigator: Dr. Piyush Chaudhari - Clinical Trial Site 2: Hindusthan Hospital, 522/3, Udayampa…	Site 1 : 10_Aster Prime Hospitals Opposite passport seva Kendra Ameepet 500038 HyderabadTELANGANA. Name of principal investigator: Dr Nagaraju B. Site 2 : 11_Medanta - The Mediicity Internal Medicine Sector 38 GurgaonGurgaonHARYANA. Name of principal investigator: Dr Sushila Kataria. Site 3 : 12_Atharva Multispeciality Hospital & Research Centre H-4/Comm-2, Construction Div 21, UP Avas Vikas Pari…
CT-10-2020.pdf .txt.csv	42858	CTRI/2020/05/025013 [Registered on: 05/05/2020] Trial Registered Prospectively	phase 2 clinical trial for the evaluation of bcg as potential therapy for covid-19.	phase 2 clinical trial for the evaluation of bcg as potential therapy for covid-i9	0.952941	Bacillus Calmette-Guerin Vaccine I.P. (Freeze Dried).	BCG plus STANDARD of CARE as suggested by DCGI	4. Place: New Delhi and the date is not explicitly stated in the prompt.	05/05/2020	: - Active ingredient: BCG (bacterial suspension), IP/BP/EP 2xto 8xCFU - Inactive ingredients: Sodium Glutamate, USP 7.5 mg; Diluent [Sodium Chloride Injection 0.9% w/v (1 ml)]; Sodium Chloride 9 mg/ml; Water for Injection I.P. q.s.	Freeze dried powder for Injection.	DOSE 0.1 ml_x000D_ ROUTE OF ADMINISTRATION Intradermal_x000D_ FREQUENCY Only once during the entire trial_x000D_ DURATION 1-2 min time required to inject subject. It is not continuous therapy.	For potential therapy for COVID-19.	(1) ICD-10 Condition: B972||Coronavirus as the cause of diseases classified elsewhere, (2) ICD-10 Condition: J709||Respiratory conditions due to unspecified external agent,	: - Clinical Trial Site 1: Name and Address: B. J. Govt. Medical College & Sassoon General Hospital, Jayprakash Narayan Road, Near Pune Railway Station, Pune 411001 Ethics Committee details: Institutional Ethics Committee, B. J. Govt. Medical College & Sassoon General Hospital, Jayprakash Narayan Road, Near Pune Railway Station, Pune 411001; ECR/280/Inst/Maha/2013/RR-19 Name of Principal Investig…	Site 1 : Sassoon General Hospital Jai Prakash Narayan Road, Near Pune Railway Station, Pune - 411001PuneMAHARASHTRA. Name of principal investigator: Dr Sonali Salvi
Sr. No. 31 CT-21-20-JSS Medical.pdf .txt.csv	44557	CTRI/2020/07/026721 [Registered on: 21/07/2020] Trial Registered Prospectively	a phase 2 study of the hepcidin mimetic ptg-300 in patients with phlebotomy-requiring polycythemia vera.	a phase 2 study of the hepcidin mimetic ptg-300 in patients with phlebotomy- requiring polycythemia vera	0.95283	PTG-300.	PTG-300	4. Place: New Delhi, Date: not mentioned.	21/07/2020	- Active ingredient: PTG-300 = 20.0000 milligram (mg) Manufacturer Specification. - Inactive ingredients: Water for Injection, Glacial Acetic Acid, Sodium Acetate Trihydrate, Sodium Chloride.	Solution for injection.	Part 1 Dose Finding Phase: 28 weeks_x000D_ all subjects will receive PTG-300. _x000D_ _x000D_ Part 2 Blinded Randomized Withdrawal Phase: Up to 12 weeks, subjects are randomized 1:1 to continue PTG-300 or to receive identical appearing placebo._x000D_ _x000D_ Part 3 Open Label Extension: Up to 3 Years, all subjects will receive PTG-300.	Phlebotomy-Requiring Polycythemia Vera.	(1) ICD-10 Condition: D45||Polycythemia vera,	Details of clinical trial sites: - All India Institute of Medical Sciences (AIIMS) Rishikesh, Rishikesh, 249203, Uttarakhand, India. Ethics committee details: Institutional Ethics Committee, All India Institute of Medical Sciences (AIIMS) Rishikesh, Department of Physiology, Veerbhadra Marg, Rishikesh, Uttarakhand-249201. ECR/736/Inst/UK/2015/RR-16. Name of investigator: Dr. Uttam Kumar Nath. - H…	Site 1 : All India Institute of Medical Sciences Veerbhadra Road Shivaji Nagar, Near Barrage, Sturida Colony, Rishikesh, Uttarakhand-249203, IndiaDehradunUTTARANCHAL. Name of principal investigator: Dr Uttam Kumar Nath. Site 2 : Christian Medical College & Hospital Brown Rd, CMC Campus, Ludhiana, Punjab 141008LudhianaPUNJAB. Name of principal investigator: Dr Joseph John. Site 3 : Hemato-Oncology…
Sr. No. 76 CT-66-21-JSS.pdf .txt.csv	44557	CTRI/2020/07/026721 [Registered on: 21/07/2020] Trial Registered Prospectively	a phase 2 study of the hepcidin mimetic ptg-300 in patients with phlebotomy-requiring polycythemia vera.	a phase 2 study of the hepcidin mimetic ptg-300 in patients with phlebotomy- requiring polycythemia vera	0.95283	PTG-300.	PTG-300	4. of the document are New Delhi and not mentioned for the date.	21/07/2020	PTG-300 = 20.0000 mg/ml In House Specification Active and PTG-300 = 40.0000 mg/ml In House Specification Active.	Solution for injection.	Part 1 Dose Finding Phase: 28 weeks_x000D_ all subjects will receive PTG-300. _x000D_ _x000D_ Part 2 Blinded Randomized Withdrawal Phase: Up to 12 weeks, subjects are randomized 1:1 to continue PTG-300 or to receive identical appearing placebo._x000D_ _x000D_ Part 3 Open Label Extension: Up to 3 Years, all subjects will receive PTG-300.	Phlebotomy-Requiring Polycythemia Vera.	(1) ICD-10 Condition: D45||Polycythemia vera,	Details of clinical trial sites: 1. All India Institute of Medical Sciences (AIIMS) Rishikesh, Rishikesh, 249203, Uttarakhand, India, Institutional Ethics Committee, All India Institute of Medical Sciences (AIIMS) Rishikesh, Department of Physiology, Veerbhadra Marg, Rishikesh, Uttarakhand-249201, ECR/736/Inst/UK/2015/RR-16, Dr. Uttam Kumar Nath. 2. Hemato Oncology Clinic Ahmedabad Pvt. Ltd. Ist …	Site 1 : All India Institute of Medical Sciences Veerbhadra Road Shivaji Nagar, Near Barrage, Sturida Colony, Rishikesh, Uttarakhand-249203, IndiaDehradunUTTARANCHAL. Name of principal investigator: Dr Uttam Kumar Nath. Site 2 : Christian Medical College & Hospital Brown Rd, CMC Campus, Ludhiana, Punjab 141008LudhianaPUNJAB. Name of principal investigator: Dr Joseph John. Site 3 : Hemato-Oncology…
Sr. No. 16 C-143-21-IQVIA.pdf .txt.csv	64095	CTRI/2022/02/040331 [Registered on: 15/02/2022] Trial Registered Prospectively	\randomised phase ii trial testing efficacy of intra-tumoural hydrogen peroxide as a radiation sensitizer in patients with locally advanced/recurrent breast cancer\.,	randomised phase ii trial testing efficacy of intra-tumoural hydrogen peroxide as a radiation sensitiser in patients with locally advanced or recurrent breast cancer	0.951515	The name of the drug is Hydrogen Peroxide.,	Radiotherapy (RT) Plus KORTUC	New Delhi and the date is not specified in the prompt.,	15/02/2022	is Hydrogen peroxide aqueous solution 35% =7.5000 %v/v In House Specification Active.,	Solution for injection.,	49.5Gy in 18 daily fractions of 2.75Gy plus 5-6 intratumoural KORTUC injections twice-weekly_x000D_ OR 36Gy in 6 twice-weekly fractions of 6Gy plus 4-5 intratumoural KORTUC injections twice-weekly	locally advanced/recurrent breast cancer.,	(1) ICD-10 Condition: C509||Malignant neoplasm of breast of unspecified site,	as follows:", "1. Sanjay Gandhi Post Graduate Institute of Medical Sciences, New PMSSY Rd, Raebareli Rd, Lucknow- 226014, Uttar Pradesh, India. Ethics committee details: Institutional Ethics Committee, Sanjay Gandhi Postgraduate Institute of Medical Sciences, Raebareli Road, Lucknow Uttar Pradesh - 226014 India. ECR number: ECR/16/Inst/UP/2013/RR-20. Name of the investigator: Dr. Punita Lal.", "2…	Site 1 : Regional Cancer Centre Medical College P.O, 695011ThiruvananthapuramKERALA. Name of principal investigator: Dr Beela Sarah Mathew. Site 2 : Sanjay Gandhi Post Graduate Institute of Medical Sciences Department of Radiotherapy, A Block, New PMSSY Rd, Raebareli Road, LucknowLucknowUTTAR PRADESH. Name of principal investigator: Dr Punita Lal. Site 3 : Tata Medical Centre Department - Radiati…
8_SERUM_IPV.pdf .txt.csv	68571	CTRI/2022/05/042363 [Registered on: 04/05/2022] Trial Registered Prospectively	\a phase ii/iii, multicenter, double blind, randomized, active controlled study to evaluate safety and immunogenicity of sii inactivated salk polio vaccine (adsorbed) in comparison with sii licensed inactivated poliovirus vaccine(ipv).\,	a phase ii/iii study, multicenter, double-blind, randomized, active controlled study to evaluate safety and immunogenicity of sii inactivated salk polio vaccine (adsorbed) in comparison with sii licensed inactivated poliovirus vaccine (ipv)	0.950617	\Inactivated Salk Polio Vaccine (Adsorbed).\ ,	SII Inactivated Salk Polio Vaccine (Adsorbed)	4. of the document are: Place - New Delhi, Date - 25-MAR-2022.,	04/05/2022	: \n- Active Ingredients: Inactivated Poliomyelitis Virus Type 1, Mahoney strain (10 DU), Inactivated Poliomyelitis Virus Type 2, MEF -1 strain (2 DU), Inactivated Poliomyelitis Virus Type 3, Saukett strain (10 DU).\n- Inactive Ingredients: Aluminium hydroxide l(OH)3 NMT 1.25 mg, 2-Phenoxyethanol 2.5mg, Formaldehyde 12.5mcg, Dilution Medium for IPV (Salk-Adsorbed) q.s. to 0.5ml. ,	\Liquid, Solution for Injection.\,	SII Inactivated Salk Polio Vaccine (Adsorbed), produced by Serum Institute_x000D_ of India Pvt. Ltd., is a sterile suspension of three types of inactivated_x000D_ poliovirus: Type 1 (Mahoney), Type 2 (MEF-1), and Type 3 (Saukett). It is a_x000D_ highly purified, adjuvanted reduced antigen content of inactivated poliovirus_x000D_ vaccine._x000D_ _x000D_ Store at 2 - 8°C_x000D_ _x000D_ Dose: 0.5 ml…	\Prevention of Poliomyelitis caused by Poliovirus Types 1, 2 and 3.\,	Prevention of poliomyelitis caused by poliovirus Types 1, 2, and 3	" :\n- Site 1: Department of Community Medicine and School of Public Health, Post Graduate Institute of Medical Education and Research, Chandigarh- 1600 Ethics Committee details: Institutional Ethics Committee, Post Graduate Institute of Medical Education and Research, Room no. 6006, IEC Office, 6th Floor, P N Chuttani Block Chandigarh-1600 India. ECR number: ECR/1019/Inst/CH/2018. Name of Princi…	Site 1 : Cheluvamba Hospital, Mysore Medical College and Research Institute Mysuru Cheluvamba Hospital, Mysore Medical College and Research Institute, Irwin Road, Next to Railway Station, Mysuru, Karnataka 570001, IndiaMysoreKARNATAKA. Name of principal investigator: Dr Pradeep N. Site 2 : IMS and SUM Hospital, Bhubaneshwar Preventive and Therapeutic Clinical Trial Unit, Department of Community M…
Sr. No. 44 Ct-104-21-Eli Lilly.pdf .txt.csv	65452	CTRI/2022/04/042242 [Registered on: 28/04/2022] Trial Registered Prospectively	ember-a randomized, open-label, phase 3 study of ly3484356 vs investigator’s choice of endocrine therapy, in patients with estrogen receptor positive, her2 negative locally advanced or metastatic breast cancer previously treated with endocrine therapy.	a randomized, open-label, phase 3 study of ly3484356 vs investigator’s choice of endocrine therapy, in patients with estrogen receptor positive, her2 negative locally advanced or metastatic breast cancer previously treated with endocrine therapy	0.948819	LY3484356.	Imlunestrant	4. of the document are New Delhi and the date is not specified in the prompt.	28/04/2022	Purified Water, Magnesium Stearate, Croscarmellose Sodium, Hydroxypropyl Cellulose, Croscarmellose Sodium, Microcrystalline Cellulose, and LY3484356 tosylate. The active ingredient is LY3484356 tosylate.	Tablets.	400mg administered orally on Days 1 to 28 of a 28-day cycle. The study will last about 4 cycles.	Metastatic Breast Cancer.	(1) ICD-10 Condition: C509||Malignant neoplasm of breast of unspecified site,	The details of the clinical trial sites include the names and addresses of the sites, ethics committee details, ECR number beginning with 'ECR', and name of the investigator. The information is provided in the Annexure section of the document.	Site 1 : Cancer Relief Society’s Rashtra Sant Tukdoji Charitable Cancer Hospital & Research Centre Tukdoji Square, Manewada Road, Nagpur, Maharashtra-440027, IndiaNagpurMAHARASHTRA. Name of principal investigator: Dr Mukesh Bang. Site 2 : Deenanath Mangeshkar Hospital & Research Centre Near Mhatre Bridge, Erandawane, Pune, Maharashtra - 411004PuneMAHARASHTRA. Name of principal investigator: Dr Ch…
Sr. No. 4 CT-131-22-Ms. Pfizer.pdf .txt.csv	77315	CTRI/2023/02/049471 [Registered on: 06/02/2023] Trial Registered Prospectively	an open-label study in pediatric (<18 years of age), severe hemophilia a participants (coagulation factor activity <1%) with or without inhibitors or moderately severe to severe hemophilia b participants (coagulation factor activity ≤2%) with or without inhibitors comparing 12 months of historical standard treatment to marstacimab prophylaxis.	an open-label study in pediatric (below 18 years of age), severe hemophilia a participants (coagulation factor activity less than 1%) with or without inhibitors or moderately severe to severe hemophilia b participants (coagulation factor activity ≤2%) with or without inhibitors comparing 12 months of historical standard treatment to marstacimab prophylaxis	0.946927	PF-06741086 (Marstacimab) Solution for Injection.	PF-06741086(Marstacimab)	4. New Delhi, and the date is not specified in the prompt.	06/02/2023	Water for Injection, Disodium Edetate, Sucrose, Polysorbate 80, L-Histidine Monohydrochloride, L-Histidine, and PF-06741086. The specific quantities of each ingredient are also provided in the prompt.	Solution for Injection.	Ages ≥12 to 18 years:_x000D_ 300 mg loading dose 150 mg QW._x000D_ Administered subcutaneously for 12 months._x000D_ Ages ≥6 to 12 years:_x000D_ 150 mg loading dose 75 mg QW_x000D_ Administered subcutaneously for 12 months.	prophylaxis to prevent or reduce the frequency of bleeding episodes in adults and children with hemophilia A and hemophilia B (with or without inhibitors).	(1) ICD-10 Condition: D67||Hereditary factor IX deficiency, (2) ICD-10 Condition: D66||Hereditary factor VIII deficiency,	The details of the clinical trial sites include the names and addresses of three sites: Nirmal Hospital Pvt. Ltd. in Surat, Gujarat; K J Somaiya Hospital and Research Centre in Mumbai; and Nil Ratan Sircar Medical College and Hospital in Kolkata. The ethics committee details, ECR number, and name of the investigator are also provided for each site.	Site 1 : KJ Somaiya Hospital and Research Centre Somaiya Ayurvihar138, Eastern Express Highway, Sion East, Mumbai, Maharashtra 400022, IndiaMumbaiMAHARASHTRA. Name of principal investigator: Dr Savita Rangarajan. Site 2 : Nil ratan Sircar Medical College and Hospital 138-A.J.C. Bose Road Kolkata 700014 West Bengal, IndiaKolkataWEST BENGAL. Name of principal investigator: Dr Tuphan Kanti Dolai. Si…
Sr. No. 99 CT-46-21-GSK.pdf .txt.csv	62792	CTRI/2022/01/039586 [Registered on: 20/01/2022] Trial Registered Prospectively	nucala effectiveness study (nest) in emerging markets.	nucala effectiveness study (nest) in emerging markets	0.946429	Mepolizumab Powder for Solution for Injection.		4. New Delhi and the date is not mentioned in the prompt.	20/01/2022	Water for Injection, Polysorbate 80, Sodium Phosphate Dibasic Heptahydrate, Sucrose, and Mepolizumab. Mepolizumab is the active ingredient.	Lyophilized rDNA product.		severe Refractory eosinophilic asthma in adult patients.	(1) ICD-10 Condition: J82||Pulmonary eosinophilia, not elsewhere classified,	The details of the clinical trial sites include the names and addresses, ethics committee details, ECR number beginning with 'ECR', and name of the investigator. The details are : - Department of Pathology, The Calcutta Medical Research Institute, 7/2 Diamond Harbour Road, Kolkata-700027, West Bengal, India. Institutional Ethics Committee, The Calcutta Medical Research Institute, ECR/132/Inst/WB/…	Site 1 : CK Birla Hospital Rukmani Birla hospital, A Unit of CMRI, Pulmology and critical care, Gopalpura Bypass road, 302018, Jaipur RajasthanJaipurRAJASTHAN. Name of principal investigator: Mukesh Sharma. Site 2 : Dr Azmat Karim Clinic A10 Block A Nizamuddin East New Delhi 110013North EastDELHI. Name of principal investigator: Dr Azmat Karim. Site 3 : Ethics Superspeciality Clinics 210, 2nd Flo…
Sr. No. 8 Ct-134-21-Novartis.pdf .txt.csv	61324	CTRI/2022/02/040589 [Registered on: 24/02/2022] Trial Registered Prospectively	: epik-b4: a phase ii, multicenter, randomized, open-label, active-controlled study to assess the safety and efficacy of dapagliflozin + metformin xr versus metformin xr during treatment with alpelisib (byl719) in combination with fulvestrant in participants with hr(+), her2(-), advanced breast cancer with a pik3ca mutation following progression on/after endocrine-based therapy.	epik-b4: a phase ii, multicenter, randomized, open-label, active-controlled study to assess the safety and efficacy of dapagliflozin plus metformin xr versus metformin xr during treatment with alpelisib (byl719) in combination with fulvestrant in participants with hr plus, her2 minus, advanced breast cancer with a pik3ca mutation following progression on/after endocrine-based therapy	0.94359	Alpelisib (BYL719).	Alpelisib plus Fulvestrant plus Dapagliflozin plus Metformin XR	4. : New Delhi, date not specified.	24/02/2022	The composition of the new drug, differentiated in active and inactive ingredients if possible, is: Active - BYL719 (Alpelisib)= 50.0 mg In House Specification, BYL719 (Alpelisib)= 200.0 mg In House Specification; Inactive - Microcrystalline cellulose, Cellulose microcrystalline (PH101); Mannitol; Sodium starch glycolate, Sodium starch glycolate (Type A); Hypromellose; Microcrystalline cellulose,…	Film Coated Tablet, Strength: 50mg and 200mg.	Alpelisib 300mg orally once daily starting at Cycle 1 Day 8 in combination with fulvestrant 500mg intramuscular at Cycle 1 Day 1 and 15 and then at Day 1 of each subsequent cycle. Participants will receive a combination treatment of dapagliflozin+metformin XR (as a single tablet or as two separate tablets, at the discretion of the investigator) at a starting dose of 5 mg dapagliflozin + 500 mg me…	HR+, HER2-, advanced Breast Cancer with a PIK3CA mutation following progression on/after endocrine-based therapy.	, (1) ICD-10 Condition: R978||Other abnormal tumor markers,	: - Rajiv Gandhi Cancer Institute and Research Centre Sector 5, Rohini-110085, New Delhi, Institutional Review Board Rajiv Gandhi Cancer Institute and Research Centre, Sector 5, Rohini-110085, New Delhi, ECR number not specified, Name of Investigator: Dr. Pankaj Goyal. - Mahamana Pandit Madan Mohan Malaviya Cancer Centre Sundar Bagiya, Department of Medical Oncology, Near Nariya Gate, Banaras Hin…	Site 1 : Health care Global Enterprise Limited, HCG Towers, Tower-I, 1st floor , #8, P. Kalinga Rao Road, Sampangi Ram Nagar Bangalore- - 560027, Karnataka IndiaBangaloreKARNATAKA. Name of principal investigator: DrShekar Patil. Site 2 : Homi Bhabha Cancer Hospital/ Mahamana Pandit Madan Mohan Malaviya Cancer Centre • Homi Bhabha Cancer Hospital, Ghanti Mill Rd., Lahartara, Old Loco Colony, Shivp…
98Pfizer.pdf .txt.csv	41040	CTRI/2020/03/023849 [Registered on: 09/03/2020] Trial Registered Prospectively	an open-label study in adolescent and adult severe (coagulation factor activity <1%) hemophilia a or b patients with or without inhibitors comparing standard treatment to pf-06741086 prophylaxis.	an open-label study in adolescent and adult severe (coagulation factor activity less than 1%) hemophilia a or b patients with or without inhibitors comparing standard treatment to pf-06741086 prophylaxis	0.935961	PF-06741086 (marstacimab) Solution for Injection.	PF-06741086 (marstacimab; anti-TFPI)	4. of the document are New Delhi and the date is not mentioned.	09/03/2020	The composition of the new drug: - Active ingredient: PF-06741086 =150.0000 mg/ml In House Specification - Inactive ingredients: Water for injection q.s. U.S.P., E.P.,J.P., Disodium Edetate = 0.0500 mg/ml U.S.P., E.P., J.P., Sucrose=85.0000 mg/ml E.P., J.P., Polysorbate 80 =0.2000 mg/ml E.P.,J.P., L-Histidine Monohydrochloride = 2.6700 mg/ml E.P.,J.P., L-Histidine =1.1200 mg/ml. U.S.P., E.P.,J.P.	Solution for injection.	300 milligrams(mg) subcutaneous (sc) loading dose followed by 150 mg sq once weekly (qw). 300 mg sc qw is prescribed for participants who meet dose escalation criteria	Prophylaxis to prevent or reduce the frequency of bleeding episodes in individuals with hemophilia A or B (with or without inhibitors).	(1) ICD-10 Condition: D67||Hereditary factor IX deficiency, (2) ICD-10 Condition: D66||Hereditary factor VIII deficiency,	: - Nirmal Hospital Pvt. Ltd., Department of Pediatrics, Ring Road, Surat- 395002, Gujarat, India. Ethics committee details: Nirmal Hospital Private Limited Ethics Committee, Nirmal Hospital Pvt. Ltd., Ring Road, Near Centre Point, Surat-395002, Gujarat, India. ECR/390/Inst/GJ/2013/RR-19, ECR/390/Inst/GJ/2013/RR-16. Name of the investigator: Dr. Nirmalkumar Ganeshmal Choraria. - Sahyadri Clinical…	Site 1 : K J Somaiya Hospital and Research Center Somaiya Ayurvihar Complex, Eastern Express Hwy, Sion East, Mumbai - 400022MumbaiMAHARASHTRA. Name of principal investigator: Dr Savita Rangarajan. Site 2 : Nirmal Hospital Pvt Ltd Department of Pediatrics, Ring Road, Surat- 395002SuratGUJARAT. Name of principal investigator: Dr Nirmalkumar Ganeshmal Choraria. Site 3 : Sahyadri Super Specialty Hosp…
8Doctors Withput Borders.pdf .txt.csv	42519	CTRI/2020/07/026414 [Registered on: 07/07/2020] Trial Registered Prospectively	endtb (evaluating newly approved drugs for multidrug-resistant tb).	endtb: evaluating newly approved drugs for multidrug-resistant tb	0.913043	Bedaquiline.	Experimental regimens will contain bedaquiline and/or delamanid and up to 4 companion drugs.	4. New Delhi, with no specific date mentioned.	07/07/2020	Bedaquiline =100.0000 milligram(mg) In House Specification Active.	Tablets.	Multidrug treatment regimens for fluoroquinolone-susceptible, rifampin-resistant tuberculosis. Experimental regimens will contain bedaquiline and/or delamanid and up to 4 companion drugs and will be delivered for 39 weeks.	Tuberculosis.	(1) ICD-10 Condition: A150||Tuberculosis of lung,	: - Aundh Chest Hospital, Sangavi Phata, Aundh Camp, Pune, with the Ethics Committee details of Institutional Ethics Committee, National AIDS Research Institute, Pune, ECR number not provided, and the name of the investigator as Dr. Sandip Patil. - Sarvodaya Hospital, Ghatkopar, Mumbai, with the Ethics Committee details of Institutional Ethics Committee, The Foundation for Medical Research, Mumba…	Site 1 : Aundh Chest Hospital Pune Aundh Camp, New Sangavi, PunePuneMAHARASHTRA. Name of principal investigator: Dr Sandip Patil. Site 2 : Sarvodaya Hospital Ghatkopar, MumbaiMumbaiMAHARASHTRA. Name of principal investigator: Dr Chetankumar Jain
63Cliantha.pdf .txt.csv	49463	CTRI/2020/12/029611 [Registered on: 07/12/2020] Trial Registered Prospectively	A Multicentre, Randomised, Double-Blind, Double-Dummy, Three-Arm, Placebo Controlled, Parallel Adaptive Phase III Clinical Study to Evaluate the Efficacy and Safety of Dimethyl Fumarate Gastro-Resistant Hard Capsule of Alvogen Malta (Out-Licensing) Ltd with Fumaderm® Gastro-Resistant Tablet of Biogen GmbH in Subjects with Moderate to Severe Chronic Plaque Psoriasis.	a multicentre, randomised, double-blind, double-dummy, three-arm, placebo controlled, parallel adaptive phase iii clinical study to evaluate the efficacy and safety of dimethyl fumarate gastro-resistant hard capsule of alvogen malta (out-licensing) ltd with fumaderm® gastro-resistant tablet of biogen gmbh in subjects with moderate to severe chronic plaque psoriasis.	0.994595	Dimethyl Fumarate Gastro-Resistant Hard Capsule 30 mg and 120mg.	Dimethyl Fumarate Gastro-Resistant Hard Capsule of Alvogen Malta (Out-Licensing) Ltd	4. Place: New Delhi, Date: not specified.	07/12/2020	Dimethyl fumarate = 30.0000 milligram (mg) In House Specification Active, Dimethyl fumarate =120.0000 milligram (mg) In House Specification Active.	Capsules.	Hard Capsule of 30 mg & 120 mg._x000D_ _x000D_ Dosing will be started with a low initial dose with subsequent increase in the dose. In the first week, 30 mg is taken once daily (1 capsule in the evening). In the second week, 30 mg is taken twice daily (1 capsule in the morning and 1 capsule in the evening). In the third week, 30 mg is taken three times daily (1 capsule in the morning, 1 capsule a…	Treatment of moderate to severe plaque psoriasis in adults in need of systemic medicinal therapy.	(1) ICD-10 Condition: L409||Psoriasis, unspecified,	: - Government Medical College and Sir Sayaji-rao General Hospital (SSGH), OPD-1, Ground Floor, Department of Dermatology, Jail Road, Indira Avenue, Sayajiganj, Vadodara-390001, Gujarat. Ethics committee details: Institutional Ethics Committee for Human Research, Pharmacology Department, Medical College and SSG Hospital, Jail Road, Indira Avenue, Vadodara-390001. ECR number: ECR/85/Inst/GJ/2013/R…	Site 1 : B.J. Government Medical College & Sassoon Gen Hospital Gr. Floor, OPD No 33. Dept. of Skin & VD., B.J. Government Medical College & Sassoon Gen Hospital, Pune-411001, Maharashtra, IndiaPuneMAHARASHTRA. Name of principal investigator: Dr Anil Gosavi. Site 2 : Banaras Hindu University Room no 1358, 2nd Floor VaranasiUTTAR PRADESH. Name of principal investigator: Dr Tulika Rai. Site 3 : Dec…
10CliniRx Research.pdf .txt.csv	45925	CTRI/2020/09/027537 [Registered on: 02/09/2020] Trial Registered Prospectively	A PILOT, OPEN-LABEL, RATER-BLINDED, RANDOMIZED, PARALLEL-GROUP, MULTI-CENTER STUDY TO EVALUATE THE SAFETY, TOLERABILITY AND PRELIMINARY EFFICACY OF THREE ADD-ON FIXED DOSES OF EVENAMIDE IN PATIENTS WITH TREATMENT-RESISTANT SCHIZOPHRENIA (TRS) NOT RESPONDING ADEQUATELY TO THEIR STABLE, THERAPEUTICALLY ACTIVE DOSE OF A SINGLE ANTIPSYCHOTIC MEDICATION.	a pilot, open-label, rater-blinded, randomized, parallel-group, multi-center study to evaluate the safety, tolerability and preliminary efficacy of three add-on fixed doses of evenamide in patients with treatment-resistant schizophrenia (trs) not responding adequately to their stable, therapeutically active dose of a single antipsychotic medication.	0.994334	Evenamide.	NW3509	4. Place: New Delhi, Date: not specified.	02/09/2020	not fully specified in the prompt.	Capsules.	Fixed oral doses of 7.5, 15 mg BID orally for 6 weeks therapy of NW-3509 (Evenamide)	Schizophrenia.	(1) ICD-10 Condition: F28||Other psychotic disorder not due to a substance or known physiological condition,	: - St. John's Medical College Hospital, Sarjapur Main Road, Bangalore 560034, Karnataka, India. Ethics committee details: Institutional Ethics Committee, St. John’s Medical College Hospital, Sarjapur Main Road, Bangalore 560034, Karnataka, India. ECR number: ECR/238/Inst/KA/2013/RR-19. Name of investigator: Dr. Johnson Pradeep. - Asha Hospital, Road No.14, Banjara Hills, Hyderabad -500034. Ethic…	Site 1 : Ahana Hospital LLP Department of Psychiatry, No. 11, Subburam Street, Gandhi NagarDepartment of Psychiatry, No. 11, Subburam Street, Gandhi Nagar, Madurai-625020 MaduraiMaduraiTAMIL NADU. Name of principal investigator: Dr Vikhram Ramasubramanian. Site 2 : All India Institute of Medical Sciences Department of Psychiatry, Sijua, Patrapada, BhubaneswarCuttackORISSA. Name of principal inves…
Sr. No. 103 CT-92-22-Lotus lab.pdf .txt.csv	76976	CTRI/2022/12/048623 [Registered on: 30/12/2022] Trial Registered Prospectively	: \A Multinational, Multicenter, Randomized, Double-Blind Study to Evaluate the Efficacy, Pharmacokinetics, Pharmacodynamics, Safety, Tolerability, and Immunogenicity of TEV-45779 Compared to Omalizumab (XOLAIR®) in Patients With Chronic Idiopathic Urticaria/Chronic Spontaneous Urticaria who Remain Symptomatic Despite Antihistamine (H1) Treatment\.,	a multinational, multicenter, randomized, double-blind study to evaluate the efficacy, pharmacokinetics, pharmacodynamics, safety, tolerability, and immunogenicity of tev-45779 compared to omalizumab (xolair®) in patients with chronic idiopathic urticaria/chronic spontaneous urticaria who remain symptomatic despite antihistamine (h1) treatment	0.994236	: TEV-457and Omalizumab (XOLAIR®).,	TEV-45779 (Omalizumab)_x000D_ 150mg/ml or 300 mg/ml Solution for injection in pre-filled_x000D_ syringe	of the document are: New Delhi, date not specified.,	30/12/2022	is: Each PFS of TEV-45779 contains 150 mg TEV-45779 in 1 mL of solution.,	: Pre-filled syringe containing solution for SC injection [150mg/mL (1ml)].,	TEV-45779 (proposed biosimilar to omalizumab) is provided as a sterile, preservative-free, clear to slightly opalescent and colorless to pale brownish-yellow solution intended for subcutaneous injection. Patients will receive a total of 6 treatments, each consisting of 2 subcutaneous injections resulting in 150mg/ml or 300mg/ml of TEV-45779 as add-on therapy every 4 weeks. Patients will receive 3…	: Chronic Idiopathic Urticaria (CIU) / Chronic Spontaneous Urticaria (CSU).,	(1) ICD-10 Condition: L501||Idiopathic urticaria,	:", "1. Sir Ganga Ram Hospital, Department of Dermatology, SRGH Marg, Rajinder Nagar-110060, New Delhi. Ethics Committee Details: Ethics Committee, Sir Ganga Ram Hospital, Sir Ganga Ram Hospital, Room no. 1643, 6h floor, Casualty Building, Old Rajinder Nagar-110060, New Delhi. ECR number: ECR/138/Inst/DL/2013. Name of Investigator: Dr. Rohit Batra.", "2. GMERS Medical College and Civil Hospital S…	Site 1 : Amrita Institute of Medical Sciences and Research Centre Dept of Dermatology, AIMS Ponekkara P.O Kochi, Kerala, India-682041ErnakulamKERALA. Name of principal investigator: Dr Vinitha Varghese Panicker. Site 2 : Assured Care Plus Hospital Department of Dermatology 4th & 5 th Floor Star Plus Complex, Lam Road, Opposite to NMC Divisional Office, Near Muktidham Temple, Nashik Road, Nashik, …
69.pdf .txt.csv	64031	CTRI/2022/03/041271 [Registered on: 22/03/2022] Trial Registered Prospectively	\A Prospective, Randomized, Multicenter, Comparative, Double-blind, Parallel study to Evaluate the Efficacy, Safety, Pharmacokinetics, and Immunogenicity of Test Pertuzumab (ZRC-3277, Cadila Healthcare Ltd.,) with Reference Pertuzumab (Perjeta®, Genentech Inc.,) in Previously Untreated Patients with HER2 Positive Metastatic Breast Cancer.\,	a prospective, randomized, multicenter, comparative, double-blind, parallel study to evaluate the efficacy, safety, pharmacokinetics, and immunogenicity of test pertuzumab (zrc-3277, cadila healthcare ltd.,) with reference pertuzumab (perjeta®, genentech inc.,) in previously untreated patients with her2 positive metastatic breast cancer.	0.994135	The names of the drug are Pertuzumab (ZRC-327Cadila Healthcare Ltd.) and Pertuzumab (Perjeta®, Genentech Inc.).,	Pertuzumab (ZRC-3277, Cadila Healthcare Ltd.,)	4. New Delhi, 31-Dec-2021.,	22/03/2022	Pertuzumab: 420 mg (In House) - Active, Citrate / Amino acid: 29 mM (B.P.,U.S.P.,Ph.Eur) - Buffer, Sucrose: 575.4 mg (J.P., Ph.Eur, NF) – Stabilizer, Polysorbate 20: 2.8000 mg (J.P.,Ph.Eur, NF) - Surfactant.,	Concentrated Solution for Intravenous infusion.,	1)Route: Intravenous_x000D_ 2)Frequency: every 3 weeks for 6 cycles_x000D_ _x000D_ Pertuzumab in combination with Trastuzumab and Docetaxel will_x000D_ be administered	Early Breast Cancer.,	(1) ICD-10 Condition: C509||Malignant neoplasm of breast of unspecified site,	" :", "- Unique Hospital Multispecialty & Research Institute, Opp. Kiran Motor, Nr. Canal, Civil Hospital Char Rasta- Sosyo Circle Lane, Off Ring Road, Surat- 395002, Gujarat. Ethics Committee: Unique Hospital Multispecialty & Research Institute, EC Reg. No.: ECR/595/Inst/GJ/2014/RR20. Principal Investigator: Dr Tanveer Maksud.", "- Erode Cancer Centre Pvt.Ltd, 1/393,Velavan Nagar, Perundurai Roa…	Site 1 : AIIMS Medical Oncology Department, Fifth Floor OPD building, AIIMS, Jodhpur, Rajasthan -342005, India JodhpurRAJASTHAN. Name of principal investigator: Dr Pramod kumar. Site 2 : All India Institute of Medical Sciences Department of Medical Oncology,Dr.B.R.A,I.R.C.H,All India Institute of Medical Sciences(AIIMS),Ansari Nagar,New Delhi,110029,India New DelhiDELHI. Name of principal investi…
Sr. No. 31 CT-01-22-Reptim.pdf .txt.csv	69372	CTRI/2022/06/043433 [Registered on: 22/06/2022] Trial Registered Prospectively	A Multi-Center, Double-Blind, Randomized, Three-arm, Placebo–Controlled, Single Period, Parallel-Group, Clinical Endpoint Bioequivalence Study of Nitazoxanide Tablets 500 mg of Annora Pharma Private Limited, India and ALINIA® (Nitazoxanide) Tablets 500 mg of Romark, L.C., USA in Patients with Diarrhea Caused by Giardia Lamblia.	a multi-center, double-blind, randomized, three-arm, placebo–controlled, single period, parallel-group, clinical endpoint bioequivalence study of nitazoxanide tablets 500 mg of annora pharma private limited, india and alinia® (nitazoxanide) tablets 500 mg of romark, l.c., usa in patients with diarrhea caused by giardia lamblia.	0.993958	The names of the drug are Nitazoxanide Tablets 500 mg and ALINIA® (Nitazoxanide) Tablets 500 mg.	Nitazoxanide 500 mg tables	4. The place of the document is New Delhi and the date is not mentioned.	22/06/2022	Nitazoxanide = 500.0000 milligram (mg) In House Specification Active.	Tablets.	Dose 500 mg_x000D_ Frequency Twice daily (Morning and Evening)_x000D_ Route of Administration Oral use Total duration of such intervention 3 days.	Diarrhea caused by Giardia lamblia or Cryptosporidium parvum.	(1) ICD-10 Condition: A071||Giardiasis [lambliasis],	provided in the Annexure of the document. The names and addresses of the clinical trial sites are: - Clinical Research Room, Department of General Medicine, Rajendra Prasad Ward, King George Hospital, Andhra Medical College, Maharanipeta, Visakhaptnam-530002, Andhra Pradesh, India - Grant Government Medical College & Sir J J Group of Hospitals, J J Marg, Byculla, Mumbai, Maharashtra - Navneet Mem…	Site 1 : Ashirwad hospital and research centre Maratha section ,Near Jijamata Udyan ,UihasnagarThaneMAHARASHTRA. Name of principal investigator: Dr Shrikant Vishnu Deshpande. Site 2 : Clinical Research Room, Rajendra Prasad Ward King George Hospital Maharanipeta, Vishakapatnam 530002 AndraPradesh, India VisakhapatnamANDHRA PRADESH. Name of principal investigator: Dr Yandrapati Gnana Sundara Raju.…
CT-09-2020.pdf .txt.csv	43206	CTRI/2020/05/025271 [Registered on: 20/05/2020] Trial Registered Prospectively	A Randomized, Double-blind, Two arm, controlled clinical trial to compare the Efficacy and Safety of Mycobacterium w (Mw) administered along with standard of care versus Placebo administered along with standard of care, in adult, COVID 19 positive patients hospitalized but not critically ill.	a randomized, double-blind, two arm, controlled clinical trial to compare the efficacy and safety of mycobacterium w (mw) administered along with standard of care versus placebo administered along with standard of care, in adult, covid 19 positive patients hospitalized but not critically ill.	0.99322	Mycobacterium w (Heat Killed).	Suspension of heat killed (autoclaved)Mycobacterium w	4. Place: New Delhi and the date is not explicitly stated in the prompt.	20/05/2020	: - Active ingredient: Mycobacterium w (Heat Killed) - 0.5 x Cells - Inactive ingredients: Sodium Chloride, I.P. - 0.9% w/v, Thiomersal I.P. - 0.01% w/v, Water for injection, I.P. q.s.	Suspension for injection.	0.3 ml (0.1ml x 3 Injection) of intradermal Mw for 3 consecutive days with Standard therapy of COVID-19	To be used in adult COVID 19 positive patients hospitalized but not critically ill.	(1) ICD-10 Condition: B972||Coronavirus as the cause of diseases classified elsewhere,	: - Clinical Trial Site 1: Post Graduate Institute of Medical Education and Research, Sector Chandigarh 1600(India) Ethics Committee details: Ethics committee, Post Graduate Institute of Medical Education and Research, Sector Chandigarh 1600(India) ECR number: ECR/25/Inst/CH/2013/RR-1 Name of Principal Investigator: Dr. Inderpaul Singh - Clinical Trial Site 2: All India Institute of Medical Scien…	Site 1 : All lndia Institute of Medical Science, Delhi A Sri Aurobindo Marg, Ansari Nagar, Ansari Nagar East, New Delhi, Delhi 110029.New DelhiDELHI. Name of principal investigator: Dr Anant Mohan. Site 2 : AII India Institute of Medical Science, Raipur Great Eastern Rd, AIIMS Campus, Tatibandh, Raipur, Chhattisgarh 492099 Raipur CHHATTISGARHRaipurCHHATTISGARH. Name of principal investigator: Dr …
35_Sanofi Influenza vaccine.pdf .txt.csv	56392	CTRI/2021/11/037841 [Registered on: 08/11/2021] Trial Registered Prospectively	\Immunogenicity and Safety of the Quadrivalent Inactivated Split-Virion Influenza Vaccine in Participants 6 Months of Age and Older in India.\,	immunogenicity and safety of the quadrivalent inactivated split-virion influenza vaccine in participants 6 months of age and older in india	0.992857	\Quadrivalent Influenza vaccine (Split Virion, Inactivated).\,	Investigational medicinal product- Quadrivalent influenza vaccine (split-virion, inactivated)	4. of the document are \New Delhi\ and \12-Oct-2021,\ respectively.,	08/11/2021	: Each single dose of 0.5 ml contains Hemagglutinin A (HIN1) 15 μg, Hemagglutinin A (H3N2) 15 μg, Hemagglutinin B /(Victoria Lineage) 15 μg, Hemagglutinin B /( Yamagata Lineage) 15 μg, and PBS q.s.,	\Suspension for injection in a pre-filled syringe.\,	Form: Suspension for injection in a pre-filled syringe_x000D_ Composition: Each 0.5 mL dose of vaccine contains the following components: _x000D_ 15 µg of HA of A/H1N1 strain _x000D_ 15 µg of HA of A/H3N2 strain _x000D_ 15 µg of HA of B/Victoria lineage strain _x000D_ 15 µg of HA of B/Yamagata lineage strain _x000D_ Buffered saline solution quantity sufficient 0.5 mL _x000D_ May also contain resi…	\For active immunization against Influenza Disease.\,	Influenza	" :", "- Prakhar Hospital Pvt. Ltd, 8/219 Arya Nagar Kanpur- 208002, U.P. India. Ethics Committee details: Prakhar Hospital Pvt Ltd., Prakhar Hospital Pvt. Ltd8/219 Arya Nagar Kanpur KanpurNagar UttarPradesh -208002 India [ECR/1017/Inst/UP/2017/RR-21]. Name of Principal Investigator: Dr. Virendra Nath.", "- Department of Community Medicine Kalinga Institute of Medical Sciences Kushabhadra campus(…	Site 1 : All India Institute of Medical Science (AIIMS) Dept. of Community & Family Medicine, All India Institute of Medical Science (AIIMS), Phulwarisharif, Patna, Bihar- 801507, India PatnaBIHAR. Name of principal investigator: Dr Chandramani Singh. Site 2 : Cheluvamba Hospital Department of Pediatrics Mysore Medical College & Research Institute, Irwin Road, Mysore Karnataka – 570 021, India My…
38_ Biological E Hepatitis A.pdf .txt.csv	62546	CTRI/2021/12/038552 [Registered on: 09/12/2021] Trial Registered Prospectively	\A prospective open label single arm phase-I study to assess the safety, tolerability, reactogenicity and immunogenicity of a single intramuscular dose of BE’s indigenously developed inactivated Hepatitis A vaccine (adsorbed) administered to 18-45 years old healthy human adults\	a prospective open label single arm phase-i study to assess the safety, tolerability, reactogenicity and immunogenicity of a single intramuscular dose of be’s indigenously developed inactivated hepatitis a vaccine (adsorbed) administered to 18-45 years old healthy human adults.	0.992857	Inactivated Hepatitis A Vaccine (Adsorbed)	Biological E’s Inactivated Hepatitis A Vaccine (Adsorbed).	New Delhi, 21-Oct-2021	09/12/2021	Inactivated Hepatitis A Virus Antigen, Aluminium Hydroxide gel, Sodium borate, 2-Phenoxy ethanol, and Sodium chloride	a solution for injection by intramuscular route	Dose: 1 ml, Route of administration: Intramuscular injection, Frequency: single dose at Day 0.	for active immunization against infection caused by Hepatitis A virus.,	Vaccination against Hepatitis-A	as follows: \n1. Maharaja Agrasen perspeciality Hospital Central Spine, grasen Aspatal Marg, Sector 7, Vidya Nagar, Jaipur, Rajasthan–302039, India. The ethics committee details are Institutional Ethics Committee, Maharaja Agrasen perspeciality Hospital Central Spine, grasen Aspatal Marg, Sector 7, Vidya Nagar, Jaipur, Rajasthan–302039, India. The ECR number is ECR/1222/Inst/RJ/2019. The name of …	Site 1 : Maharaja Agrasen Superspeciality Hospital, Department of Medicine, 1st floor ,Central Spine, Agrasen Aspatal Marg, Sector -7 Vidyadhar NagarJaipurRAJASTHAN. Name of principal investigator: Dr Prabhat Kumar Sharma
Sr. No. 44 CT-11-20-Ethicare.pdf .txt.csv	41469	CTRI/2022/09/045136 [Registered on: 01/09/2022] Trial Registered Prospectively	A Randomised, Double-blind, Multicenter, Placebo-controlled, Parallel Study to Evaluate the Efficacy and Safety of Tranexamic Acid Mouthwash of Morningside Healthcare Limited, UK, to Reduce Bleeding in Subjects undergoing Tooth Extraction Who Are on Drugs Affecting Hemostasis	a randomised, double-blind, multicenter, placebo-controlled, parallel study to evaluate the efficacy and safety of tranexamic acid mouthwash of morningside healthcare limited, uk, to reduce bleeding in subjects undergoing tooth extraction who are on drugs affecting hemostasis.	0.992806	Tranexamic Acid	Tranexamic acid mouthwash 50 mg/ml.	4. Place: New Delhi, Date: Not mentioned	01/09/2022	Active Ingredients: Tranexamic Acid; Inactive Ingredients: Citric acid Anhydrous Ph. Eur, Sodium Methyl Para Hydroxybenzoate, Sodium Propyl Para Hydroxybenzoate, Menthol Crystals (Laevo), Propylene Glycol, Purified Water	Mouth Wash	Take 10 ml of solution in mouth for 2 mins and drain gently, 4 times in a day for 3 days including day of extraction.	To reduce bleeding in subjects undergoing tooth extraction who are on drugs affecting hemostasis	(1) ICD-10 Condition: K089||Disorder of teeth and supporting structures, unspecified,	1. Shalby Hospital, Opposite Karnavati Club, S.G. Highway, Ahmedabad-380015, Gujarat, India; Ethics Committee – Shalby Limited, Shalby Hospital, Opposite Karnavati Club, S.G. Highway, Ahmedabad-380015, Gujarat, India; ECR/711/Inst/GJ/2015/RR-18; Dr. Darshini V Shah 2. AMC Dental College and Hospital, Bhalakia Mill Compound, Khokhra, Ahmedabad - 380008, Gujarat, India; Institutional Ethics Committ…	Site 1 : All India Institute of Medical Sciences Department of Dentistry, C Block, Ground Floor, All India Institute of Medical Sciences, G E Road, Tathibandh, Raipur, Chattisgarh- 492099, IndiaRaipurCHHATTISGARH. Name of principal investigator: Dr Santhosh Rao. Site 2 : AMC Dental College and Hospital Oral and Maxillofacial Surgery Department,Oral Surgery division,Ground Floor,AMC Dental College…
Sr. No. 11 Ct-154-21-Cipla.pdf .txt.csv	72170	CTRI/2022/08/044640 [Registered on: 04/08/2022] Trial Registered Prospectively	A Multicenter, Randomized, Parallel-Group, 6- Week Treatment Clinical Study to Assess Bioequivalence of Budesonide 80 μg and Formoterol Fumarate Dihydrate 4.5 μg Inhalation Product (Cipla Ltd.) in comparison with the Reference Product, Symbicort® (Budesonide/Formoterol Fumarate Dihydrate, 80/4.5 μg per Actuation) Inhalation Aerosol (AstraZeneca, USA), in Adult Asthma Patients.	a multicenter, randomized, parallel-group, 6-week treatment clinical study to assess bioequivalence of budesonide 80 μg and formoterol fumarate dihydrate 4.5 μg inhalation product (cipla ltd.) in comparison with the reference product, symbicort® (budesonide/formoterol fumarate dihydrate, 80/4.5 μg per actuation) inhalation aerosol (astrazeneca, usa), in adult asthma patients.	0.992126	The names of the drug are Budesonide and Formoterol Fumarate Dihydrate.	Budesonide 80 μg and Formoterol Fumarate Dihydrate 4.5 μg Inhalation Product	4. of the document are New Delhi and the date is not mentioned in the prompt.	04/08/2022	Formoterol Fumarate Dihydrate = 4.5000 micrograms (μg) In House Specification Active and Budesonide = 80.0000 micrograms (μg) In House Specification Active.	Inhalation aerosol.	Budesonide 80 μg and Formoterol Fumarate Dihydrate 4.5 μg Inhalation Product 2 actuations_x000D_ Twice daily for 6 weeks_x000D_ Route of administration is inhalation	Asthma.	(1) ICD-10 Condition: J454||Moderate persistent asthma,	: - Orchid Specialty Hospital, Basement, L-Squire, Porwal Road, Sr. No. 282/3/3, Off, Dhanori Jakat Naka, Lohgaon, Pune-411047, Maharashtra, India. Ethics committee details: Orchid Specialty Hospital Ethics Committee, Orchid Specialty Hospital, L-Squire, Porwal Road, Sr. No. 282/3/3, Lohgaon, Pune-411047, Maharashtra, India. ECR/1089/Inst/MH/2018/RR-21. Name of the investigator: Dr. Goyal Ashish …	Site 1 : ACSR Govt. Medical College and Hospital ACSR Government Medical College and Hospital, GT Road, Dargamitta, Nellore 524004, Andhra Pradesh, IndiaNelloreANDHRA PRADESH. Name of principal investigator: Dr Shaik Noushad Ali. Site 2 : Aster Aadhar Hospital R.S. No. 628, B Ward, Near KMT Workshop, Shastri Nagar, Kolhapur, Maharashtra, India 416012KolhapurMAHARASHTRA. Name of principal investig…
Sr. No. 28 Ct-110-22-IQVIA.pdf .txt.csv	76623	CTRI/2023/04/051940 [Registered on: 25/04/2023] Trial Registered Prospectively	\A randomized, double-blind, placebo-controlled, 2-arm Phase III study to assess efficacy and safety of xevinapant and radiotherapy compared to placebo and radiotherapy for demonstrating improvement of disease-free survival in participants with resected squamous cell carcinoma of the head and neck, who are at high risk for relapse and are ineligible for high-dose cisplatin\	a randomized, double-blind, placebo-controlled, 2-arm phase iii study to assess efficacy and safety of xevinapant and radiotherapy compared to placebo and radiotherapy for demonstrating improvement of disease-free survival in participants with resected squamous cell carcinoma of the head and neck, who are at high risk for relapse and are ineligible for high-dose cisplatin	0.992042	The name of the drug is xevinapant	Xevinapant	of the document are New Delhi and not specified	25/04/2023	is xevinapant = 20.0000 mg/ml In House Specification Active	oral solutions	Xevinapant (oral solution 200 mg/day from Day 1 to 14, per 3-week cycle) + IMRT (66 Gy in 33 fractions, 2 Gy/fraction, 5 days/week), followed by monotherapy of xevinapant (200 mg/day from Day 1 to 14, per 3-week cycle).	squamous cell carcinoma of head and neck	(1) ICD-10 Condition: C760||Malignant neoplasm of head, face and neck,	as follows:", "1. National Cancer Institute, Khasara No. 25, Outer Hingna Ring Road, Mouza Jamtha, Nagpur-441108, Maharashtra, India. Ethics committee details: National Cancer Institute Ethics Committee, Khasara No. 25, Outer Hingna Ring Road, Mouza Jamtha, Nagpur - 441108, Maharashtra, India. ECR/1130/Inst/MH/2018/RR-21. Name of the investigator: Dr. Anand Pathak.", "2. Tata Medical Center, 14 M…	Site 1 : National Cancer Institute Khasara No. 25, Outer Hingna Ring Road, Mouza- Jamtha 441108NagpurMAHARASHTRA. Name of principal investigator: Dr Anand Pathak. Site 2 : Regional Cancer Center Medical College P.OThiruvananthapuramKERALA. Name of principal investigator: Dr Rejnish Kumar R. Site 3 : Tata Medical Centre 14 Major Arterial Road (EW), New Town, Rajarhat 700160KolkataWEST BENGAL. Name…
Sr. No. 17 CT-168-21-Glenmark.pdf .txt.csv	66871	CTRI/2022/03/041216 [Registered on: 21/03/2022] Trial Registered Prospectively	\A randomized, assessor-blind, placebo controlled, multi center, clinical endpoint bioequivalence study to compare the efficacy and safety of generic fluticasone propionate inhalation aerosol USP 44 mcg (Glenmark Pharmaceuticals Ltd) to Flovent HFA (fluticasone propionate inhalation aerosol) 44 mcg (GSK group of companies) in treatment of patients with bronchial asthma.\\n4	a randomized, assessor-blind, placebo controlled, multi center, clinical endpoint bioequivalence study to compare the efficacy and safety of generic fluticasone propionate inhalation aerosol usp 44 mcg (glenmark pharmaceuticals ltd) to flovent hfa (fluticasone propionate inhalation aerosol) 44 mcg (gsk group of companies) in treatment of patients with bronchial asthma	0.991957	Fluticasone Propionate Inhalation Aerosol USP 44 mcg and Flovent HFA (fluticasone propionate inhalation aerosol) 44 mcg.\n8	Fluticasone propionate inhalation aerosol USP 44 mcg (Glenmark Pharmaceuticals Ltd.)	New Delhi, and the date is not specified in the prompt.\n5	21/03/2022	is Fluticasone Propionate USP 44 mcg (active ingredient) and Propellant HFA 134a (1,1,1,2‐tetrafluoroethane) q.s (inactive ingredient).\n11	inhalation aerosol.\n10	Dosage Form: Metered dose Inhalation Aerosol _x000D_ Dosage Frequency 44 mcg (two inhalations; twice daily (i.e. morning & evening approximately. 12 h apart, _x000D_ Mode of Administration: Oral inhalation	maintenance treatment of asthma as prophylactic therapy in adult and pediatric patients aged 4 years and older, and it is not indicated for relief of acute bronchospasm.\n12	(1) ICD-10 Condition: J459||Other and unspecified asthma,	provided in the Annexure of the document. The names and address, ethics committee details, ECR number beginning with 'ECR', and name of the investigator are as follows:", "- Hindusthan Hospital, 522/3, 523/3 Nava India Road Udaiyampalayam, Coimbatore - 641028, Tamil Nadu, India. Institutional Human Ethics Committee, Hindusthan Hospital 522/3, 523/3 Nava India Road, Udaiyampalayam, Coimbatore-6410…	Site 1 : ACE Hospital & Research Centre Sector No. 8/4/1, Yashwant Apartment, Shop No: 07, Lane No: 04, Karve Nagar, Pune-411052PuneMAHARASHTRA. Name of principal investigator: Dr Himanshu Pophale Shashikant. Site 2 : Apollo Spectra Hospital Apollo Specialty Hospital Pvt Ltd 14/138 Chunniganj Mall Road Kanpur-208001Kanpur NagarUTTAR PRADESH. Name of principal investigator: Dr Sandeep Katiyar. Sit…
CT-26-2020.pdf .txt.csv	51189	CTRI/2021/02/031160 [Registered on: 09/02/2021] Trial Registered Prospectively	A Phase I Randomized Single Blind Placebo Controlled Study to Evaluate the Safety and Immunogenicity of Chikungunya Vaccine (Inactivated) of HBI when administered by two different dosage schedules to Healthy Subjects of 19 to 49 Years of age.	a phase i randomized single blind placebo controlled study to evaluate the safety and immunogenicity of chikungunya vaccine (inactivated) of hbi when administered by two different dosage schedules to healthy subjects of 19 to 49 years of age.	0.991803	Chikungunya vaccine (Inactivated).	Chikungunya vaccine (Inactivated) of HBI	4. Place: New Delhi, Date: 04-Nov-2020.	09/02/2021	: - Active ingredient: Inactivated Chikungunya Antigen ≥ 8 EU - Inactive ingredients: Aluminium hydroxide gel equivalent to Al+++ ≤ 1.25 mg, Tween 20 ≤ 50 μg, Phosphate buffer saline (PBS) q.s.	Suspension for Injection for Intramuscular administration.	1.0 mL will be administered by intramuscular route in the deltoid region of the arm. The vaccine will be administered following 0, 28 days schedule for Group I and 0, 28 and 56 days schedule for Group II.	Prophylaxis against Chikungunya.	Prevention of Chikungunya infection	: - Site 1: Bharati Vidyapeeth Medical College & Hospital, Pune-Satara Road, Katraj-Dhankawadi, Pune-411043, Maharashtra, India - Ethics Committee details: Institutional Ethics Committee BVDU, Bharathi Vidyapeeth Hospital & Research Centre, Pune, [ECR/313/Inst/MH/2013/RR-19] - Name of Principal Investigator: Dr. Sonali Palkar	Site 1 : Bharati Vidyapeeth (Deemed to be University) Medical College & Hospital Pediatric Research Cell, Department of Pediatrics, Bharati Vidyapeeth (Deemed to be University) Medical College & Hospital , Pune-Satara Road, Katraj-Dhankawadi, Pune-411043, Maharashtra, IndiaPuneMAHARASHTRA. Name of principal investigator: Dr Sonali Palkar. Site 2 : Vedant Multispecialty Hospital, Department of Med…
36_Biological E Pentavalent.pdf .txt.csv	62113	CTRI/2021/12/038399 [Registered on: 02/12/2021] Trial Registered Prospectively	\A prospective open label comparative phase-IV bridging study to assess the equivalence of the revised DTwP-rHepB-HIB vaccine formulation with that of the currently licensed DTwP-rHepB-HIB formulation in 6-8 weeks old infants\.,	a prospective open label comparative phase-iv bridging study to assess the equivalence of the revised dtwp-rhepb-hib vaccine formulation with that of the currently licensed dtwp-rhepb-hib formulation in 6-8 weeks old infants.	0.991189	The names of the drug are \Diphtheria, Tetanus, Pertussis (Whole cell), Hepatitis B (r-DNA) and Haemophilus influenza type b Conjugate Vaccine (Adsorbed)\.,	BE’s liquid Pentavalent vaccine containing formalin-mediated whole cell pertussis)	4. \New Delhi\ and \12-Oct-2021\.,	02/12/2021	provided in the prompt, differentiated in active and inactive ingredients.,	\Suspension for Intramuscular Injection\.,	0.5mL per dose administered intramuscularly in 3 dose schedule with 28 days interval between doses in mid/upper thigh (vastus lateralis muscle).	\For active immunization against diphtheria, tetanus, pertussis (whooping cough), Hepatitis B and hib disease in infants from 6 weeks of age\.,	Preventive protection against Diphtheria, Tetanus, Petussis, Hepatitis-B and Haemophilus Influenzae type B diseases	" provided in the prompt, including the names and addresses, ethics committee details, ECR number beginning with 'ECR', and name of the investigator. The clinical trial sites are IMS & SUM Hospital in Bhubaneswar, Mysore Medical College and Research Institute in Mysore, Government Medical College and Hospital in Nagpur, Jawahar Lal Nehru Medical College in Ajmer, Lata Mangeshkar Multi Speciality …	Site 1 : Belagavi Institute of Medical Sciences Department of pediatrics, Dr B R Ambedkar Rd, Sadashiv Nagar, 2nd Floor, Belagavi - 590019BelgaumKARNATAKA. Name of principal investigator: Dr Shailesh Patil. Site 2 : Cheluvamba Hospital Dept. of Paediatrics, ground floor,Irwin Road,Devraj Mohalla, Mysuru 570001MysoreKARNATAKA. Name of principal investigator: Dr S Prashanth. Site 3 : Government Med…
Sr. No. 106 CT-93-22-Novotech.pdf .txt.csv	74395	CTRI/2023/02/050138 [Registered on: 27/02/2023] Trial Registered Prospectively	\A Randomized, Double-Blind, Four-Arm Active And Placebo-Controlled Dose-Finding Trial To Evaluate The Efficacy, Tolerability, Safety And Dose Response Of LYT-100 In Patients With Idiopathic Pulmonary Fibrosis (IPF)\. ,	a randomized, double-blind, four-arm active and placebo-controlled dose-finding trial to evaluate the efficacy, tolerability, safety and dose response of lyt-100 in patients with idiopathic pulmonary fibrosis (ipf).	0.990783	The name of the drug is LYT-100. ,	LYT-100	New Delhi, and the date is not specified in the prompt. ,	27/02/2023	is Total Impurities <2.0000 % In House Specification Total Impurity, Individual Impurity <0.2000 % In House Specification Individual Impurity, and Assay 90.0000 to110.0000 % In House Specification Active. ,	Capsules. ,	550 mg LYT-100 three times a day over a 26-week treatment period (6 months)_x000D_ _x000D_ 825 mg LYT-100 three times a day over a 26-week treatment period (6 months)	Idiopathic Pulmonary Fibrosis. ,	(1) ICD-10 Condition: J841||Other interstitial pulmonary diseases with fibrosis,	The details of the clinical trial sites include the names and addresses, ethics committee details, ECR number beginning with 'ECR', and name of the investigator. These details are provided in the Annexure section of the document.")	Site 1 : Apollo Spectra Hospital Basement room number B-20, 14/138, Chunniganj, Near B.N.S.D Inter College, Mall Road, Kanpur, Uttar Pradesh- 208001, IndiaKanpur NagarUTTAR PRADESH. Name of principal investigator: Dr Sandeep Katiyar. Site 2 : Getwell Hospital and Research Institute Clinical Research Department, 5th Floor, 20/1, Dr. Khare Marg, Dhantoli, Nagpur-440012NagpurMAHARASHTRA. Name of pri…
Sr. No. 5 CT-60-22-Ms. Novo-Nordisk.pdf .txt.csv	68909	CTRI/2023/03/050330 [Registered on: 03/03/2023] Trial Registered Prospectively	: \A study comparing the effect and safety of once weekly dosing of somapacitan with daily Norditropin® as well as evaluating long-term safety of somapacitan in a basket study design in children with short stature either born small for gestational age or with Turner syndrome, Noonan syndrome, or idiopathic short stature\.,	a study comparing the effect and safety of once weekly dosing of somapacitan with daily norditropin® as well as evaluating long-term safety of somapacitan in a basket study design in children with short stature either born small for gestational age or with turner syndrome, noonan syndrome, or idiopathic short stature	0.990654	The names of the drug are: Somapacitan 5 mg/1.5 ml, Somapacitan 10 mg/1.5 ml, and Somapacitan 15 mg/1.5 ml.,	somapacitan	4. : New Delhi, date not specified.,	03/03/2023	: Active substance - Somapacitan = 3.3 mg/ml In House Specification / Somapacitan = 6.7 mg/ml In House Specification / Somapacitan = 10.0 mg/ml In House Specification; Excipients - L-histidine = 0.68 mg/ml U.S.P., Ph. Eur., J.P., Mannitol = 44 mg/ml U.S.P., Ph. Eur., J.P., Poloxamer 188 = 1.0 mg/ml U.S.P., Ph. Eur., J.P., Phenol = 4.0 mg/ml U.S.P., Ph. Eur., J.P., Water for injection = q.s. 1.0 m…	: Solution for injection.,	somapacitan 5 mg/1.5 mL_x000D_ • somapacitan 10 mg/1.5 mL_x000D_ • somapacitan 15 mg/1.5 mL, Subcutaneous for 155 weeks_x000D_ 0.24 mg/Kg/Week-dose	: Children with short stature either born small for gestational age or with Turner syndrome, Noonan syndrome, or idiopathic short stature.,	(1) ICD-10 Condition: E368||Other intraoperative complicationsof endocrine system,	" :\n- Clinical trial site 1: Jehangir Clinical Development Centre Pvt. Ltd., Jehangir Hospital Premises, 32 Sassoon Road, Pune 411001. Ethics committee details - Jehangir Clinical Development Centre Pvt Ltd., Jehangir Clinical Development Centre Pvt Ltd, 32, Sassoon road, Pune – 411001. ECR/352/Inst/MH/2013/RR-19. Name of investigator - Dr. Vaman Vasant Khadilkar.\n- Clinical trial site 2: Ward …	Site 1 : All India Institute of Medical Sciences (AIIMS) Room 303, Biotechnology Block, Dept of Endocrinology, Ansari NagarNew DelhiDELHI. Name of principal investigator: Dr Rajesh Khadgawat. Site 2 : Amrita Institute of Medical Sciences & Research Centre Dept of Endocrinology and Diabetes, AIMS Ponekkara.P.O,KochiErnakulamKERALA. Name of principal investigator: Dr Praveen Valliyaparambil Pavithr…
[truncated: 100 more rows]

## Sheet: 271 green
Pdf_name	CTRI_Page_number	CTRI_no	pdf_title	ctri_scientific_title	Similarity_score	Pdf_Drug_name	CTRI_Drug_name	Pdf_Date	CTRI_Registration_date	Pdf_Composition	Pdf_Dosage	CTRI_Intervention	Pdf_Indication	CTRI_Indication	Pdf_Sites	CTRI_Sites_data
[truncated: 271 more rows]

## Sheet: 19 red
Pdf_name	CTRI_Page_number	CTRI_no	pdf_title	ctri_scientific_title	Similarity_score	Pdf_Drug_name	CTRI_Drug_name	Pdf_Date	CTRI_Registration_date	Pdf_Composition	Pdf_Dosage	CTRI_Intervention	Pdf_Indication	CTRI_Indication	Pdf_Sites	CTRI_Sites_data
[truncated: 19 more rows]
