# Supplementary material for: Data from the Indian drug regulator and from Clinical Trials Registry-India does not always match
Source: Front Med (Lausanne). 2024 Feb 15;11:1346208. doi: 10.3389/fmed.2024.1346208 (PMC10906088; doi:10.3389/fmed.2024.1346208)
Supplement: Supplementary file 7 [file Data_Sheet_7.xls]

## Sheet: Legend and covering note
Supplementary File S7. Comparing the sites and PIs of the trials in 151 CDSCO-issued letters and the corresponding record in CTRI
Sheet name	Description	Number of records
151	For 151 records, the number of sites and PIs in the CDSCO letters and the corresponding CTRI record, and a comparison thereof	151

## Sheet: 151
Pdf_name	CTRI_Page_number	CTRI_no	Pdf_Sites	CTRI_Sites_data	Number of sites in CDSCO letter	Number of sites in CTRI record	How many of the CDSCO sites were in CTRI	Number of PIs in CDSCO letter	Number of PIs in CTRI record	How many of the CDSCO PIs were in CTRI
Sr. No. 122 CT-101-21-Novartis.pdf .txt.csv	55397	CTRI/2021/12/038680 [Registered on: 16/12/2021] Trial Registered Prospectively	1.All India Institute of Medical Sciences, Ansari Nagar, New Delhi-110029 Institute Ethics Committee, All India Institute of Medical Sciences, Room no. 102, First Floor, Old O.T. Block, AIIMS, Ansari Nagar, New Delhi 110029 ECR/538/Inst/DL/2014/RR-20 Dr. Chandrasekhar Bal 2.Cancer Institute (WIA), 38 Sardar Patel Road, Chennai 600036 Institutional Ethics Committee, Cancer Institute, East Canal Ba…	Site 1 : AADHAR HEALTH INSTITUTE Opd no 7, ground floor, TOSAM ROAD NEAR SOUTH BYPASS CROSSING HISSAR 125005HisarHARYANA. Name of principal investigator: DR LOVENISH GOYAL. Site 2 : AIIMS Sri Aurobindo Marg, Ansari Nagar, Ansari Nagar East, New Delhi, Delhi 110029New DelhiDELHI. Name of principal investigator: Dr C S Bal. Site 3 : Cancer Institute 38, SARDAR PATEL ROAD, Chennai-600036, Tamil Nadu…	5	7	5	5	7	4
Sr. No. 51 CT-160-21-Sun Pharma.pdf .txt.csv	56789	CTRI/2022/05/042392 [Registered on: 05/05/2022] Trial Registered Prospectively	1. Amrita Institute of Medical Sciences and Research Centre, AIMS Ponekkara P O. Cochin -682041, Kerala, India Institutional Ethics Committee Amrita Institute of Medical Sciences, AIMS-Ponekara, Kochi, Edappally, Ernakulam, Kerala, 682041, India ECR/129/Inst/KL/2013/RR-19 Dr. Pavithran Keechilat 2. Meenakshi Mission Hospital & Research Centre, Lake Area, Melur Road, Madurai 625107 Tamil Nadu, Ind…	Site 1 : Amrita Institute of Medical Sciences (AIMS) Ponnekara P.O, Kochi - 682041, India ErnakulamKERALA. Name of principal investigator: Dr Pavithran Kheechilat. Site 2 : HCG Manavata cancer Centre Behind Shivang Auto, Mumbai Naka, 422002, IndiaNashikMAHARASHTRA. Name of principal investigator: Dr Aditya Adhav. Site 3 : HealthCare Global Enterprises Ltd HCG Tower, #8, P. Kalinga Rao Road, Sampa…	8	7	7	8	7	7
Permission 7.pdf .txt.csv	57680	CTRI/2021/10/037406 [Registered on: 20/10/2021] Trial Registered Prospectively	- Site 1: St. John's Medical College, Institutional Ethical review Board (IERB), Ground Floor, St. John's Medical College, Sarjapur Road, Bangalore Karnataka - 560034. Ethics Committee Details: Institutional Ethics Committee, St. John’s Medical College & Hospital, Sarjapur Road Koramangala Bangalore-5600034, Urban Karnataka. ECR number: ECR/238/Inst/KA/2013/RR-19. Name of Principal Investigator: …	Site 1 : All India Institute of Medical Sciences Department of Haematology All India Institute of Medical Sciences, Ansari Nagar, New Delhi -110029New DelhiDELHI. Name of principal investigator: Dr Tulika Seth. Site 2 : Amrita Institute of Medical Sciences and Research Centre Department of Haematology Amrita Institute of Medical Sciences, Peeliyadu Road, Ponekkara, Edappally, Ernakulam, Kerala 68…	4	5	4	4	5	4
Sr. no. 10 Ct-129-21-Bharat Serum.pdf .txt.csv	65078	CTRI/2022/03/040842 [Registered on: 04/03/2022] Trial Registered Prospectively	1.Milann, (A Unit of BACC Healthcare Pvt. Ltd.) No. #7, East Park Road, Kumara Park East, Bangalore, Karnataka-560001 IIRRH-BACC Healthcare Institutional Ethics Committee, No. #7, East Park Road, Kumara Park East, Bangalore, Karnataka-560001 ECR/773/Inst/KA/2015/RR-18 Dr. Kamini A Rao 2.All India Institute of Medical Sciences, Room No. 3090- A, Dept of Obstetrics & Gynaecology, 3rd Floor, Teachin…	Site 1 : Om Research Center Om Surgical Center and Maternity Home SA-17/3, P-4, Sri Krishna Nagar Paharia, Ghazipur Road Varanasi - 221007 VaranasiUTTAR PRADESH. Name of principal investigator: Dr Shalini Shrivastava. Site 2 : RISAA IVF International Fertility Centre H-6, Green Park, 110016New DelhiDELHI. Name of principal investigator: Dr Rita Bakshi. Site 3 : Bavishi Fertility Institute Next to…	2	18	2	2	18	2
Sr. No. 125 CT-130-21-Bioinnovat.pdf .txt.csv	63600	CTRI/2022/04/041596 [Registered on: 01/04/2022] Trial Registered Prospectively	1.Dr. Ram Manohar Lohia Institute of Medical Sciences, Vibhuti Khand, Gomti Nagar, Lucknow-226010 Institutional Ethics Committee, Research Cell Office, 2nd Floor, Room no. 35, Administrative Block, Dr. Ram Manohar Lohia Institute of Medical Sciences, Vibhuti Khand, Gomti Nagar, Lucknow-226010 Dr. Abdul Qavi 2.All India Institute of Medical Sciences, New Delhi, Neurosciences Centre Room, 705, 7th …	Site 1 : All India Institute of Medical Science Room no-705, 7th Floor,Department of neurology, ,Sri Aurobindo Marg, Ansari Market, Ansari Nagar, New Delhi,Delhi, 110029SouthDELHI. Name of principal investigator: Dr Manjari Tripathi. Site 2 : DKS Post Graduate Institute and Research Center Room No 4, Ground Floor, Department of Neurology, Ghadi Chowk, Raipur, Chattisgarh 492002 RaipurCHHATTISGARH…	5	7	4	5	7	4
68Sanofi.pdf .txt.csv	45641	CTRI/2020/11/029092 [Registered on: 12/11/2020] Trial Registered Prospectively	- Centre for Advanced Neurological Research, Justice K S Hegde Charitable Hospital, Nitte (Deemed to be University), Medical Science Complex, Deralakatte, Mangalore-575018, Central Ethics Committee, Nitte (Deemed to be University), University enclave, Deralakatte, Mangalore-575018, ECR/119/Inst/KA/2013/RR-19, Dr. Lekha Pandit. - Fortis Memorial Research Institute, Sector-44, Opposite Huda City Ce…	Site 1 : All India Institute of Medical Sciences (AIIMS) - The Neurosciences (N.S) Centre Sri Aurobindo Marg, Ansari Nagar, Ansari Nagar East, New Delhi, Delhi 110029, IndiaSouth WestDELHI. Name of principal investigator: Dr M V Padma. Site 2 : Artemis Hospital Sector 51, Gurugram, Haryana 122001, IndiaGurgaonHARYANA. Name of principal investigator: Dr Manish Mahajan. Site 3 : Brain Clinic Jaslee…	5	9	5	5	9	5
79CT-82-20-Sanofi.pdf .txt.csv	46809	CTRI/2020/10/028392 [Registered on: 13/10/2020] Trial Registered Prospectively	- Artemis Hospitals, Sector-51, Gurugram-001, Haryana, Ethics committee details: Artemis Health Sciences Institutional Ethics Committee, Artemis Health Institute, Sector-51, Gurugram-001, Haryana, ECR/53/Inst/HR/2013/RR-2019, Name of investigator: Dr. Manish Mahajan. - Department of Neurology, Sir Ganga Ram Hospital, Sir Ganga Ram Hospital Marg, Rajinder Nagar, New Delhi-110060, India, Ethics Com…	Site 1 : All India Institute of Medical Sciences Dept. of Neurology, Neuroscience Centre, Ansari Nagar, Ansari Nagar EastNew DelhiDELHI. Name of principal investigator: Dr M V Padma. Site 2 : Artemis Hospital Sector 51, Gurugram GurgaonHARYANA. Name of principal investigator: Dr Manish Mahajan. Site 3 : Fortis Hospital Fortis Memorial Fortis Memorial Research Institute Sector 44, Opp Huda City Ce…	5	8	4	5	8	4
Sr. No. 50 Ct-44-20-Pfizer.pdf .txt.csv	48022	CTRI/2020/10/028440 [Registered on: 16/10/2020] Trial Registered Prospectively	1. Gujarat Hospital – Gastro and Vascular Centre, Opposite Shree Ram Petrol Pump, Anand Mahal Road, Adajan, Surat, Gujarat-395009, India; Ethics committee details: Unity Hospital Ethics Committee, Unity Trauma Center and ICU, N-4 Janki Park Society Aai Mata Road, Paravat Patiya, Surat, Gujarat - 395010, Gujarat; ECR/6/Inst/GJ/2019; Name of investigator: Dr. Saumin P Shah. 2. Global Hospitals –Sup…	Site 1 : Global Hospital – Super Specialty & Transplant Centre 35, Dr. E. Borges Road, Hospital Avenue, Opp. Dr Shirodkar High School, Parel, Mumbai, Maharashtra – 400012, IndiaMumbaiMAHARASHTRA. Name of principal investigator: Dr Samir Ramnik Shah. Site 2 : Gujarat Hospital – Gastro and Vascular Centre Opposite Shree Ram Petrol Pump, Anand Mahal Road, Adajan, Surat, Gujarat – 395009, India.Surat…	7	8	7	7	8	7
Sr. no. 9 CT-145-21-George Institute.pdf .txt.csv	51687	CTRI/2022/03/040802 [Registered on: 04/03/2022] Trial Registered Prospectively	"- All India Institute of Medical Sciences, Great Eastern Road, Tatibandh, Raipur-492099, Chhattisgarh\nEthics committee details: Institutional Ethics Committee, Room No. 2103, 2nd Floor, Medical College Complex, Gate No, 5, All India Institute of Medical Sciences (AIIMS), Tatibandh, GE Road, Raipur-492099, Chhattisgarh ECR number: ECR/714/Inst/CT/2015/RR-18 Name of investigator: Dr. Vinay Rathor…	Site 1 : All India Institute of Medical Sciences Great Eastern Road Tatibanch Raipur 492099 ChattisgarhRaipurCHHATTISGARH. Name of principal investigator: Vinay Rathore. Site 2 : Institute of Medical Sciences, Banaras Hindu University Department of Nephrology, IMS, BHUVaranasiUTTAR PRADESH. Name of principal investigator: Shivendra Singh. Site 3 : Institute of Postgraduate Medical Education and R…	7	13	7	7	13	7
1.BSV.pdf .txt.csv	51849	CTRI/2021/02/031566 [Registered on: 25/02/2021] Trial Registered Prospectively	- Clinical Trial Site 1: Jehangir Hospital, 32, Sassoon Road, Pune - 411 001 (For phase I & II clinical trial) Ethics Committee details: Ethics Committee, Jehangir, Clinical Development Centre Pvt. Ltd. Jehangir Hospital, 32, Sassoon Road, Pune - 411 001. ECR/352/INST/MH/2013/RR-19 Name of Principal Investigator: Dr. Piyush Chaudhari - Clinical Trial Site 2: Hindusthan Hospital, 522/3, Udayampala…	Site 1 : 10_Aster Prime Hospitals Opposite passport seva Kendra Ameepet 500038 HyderabadTELANGANA. Name of principal investigator: Dr Nagaraju B. Site 2 : 11_Medanta - The Mediicity Internal Medicine Sector 38 GurgaonGurgaonHARYANA. Name of principal investigator: Dr Sushila Kataria. Site 3 : 12_Atharva Multispeciality Hospital & Research Centre H-4/Comm-2, Construction Div 21, UP Avas Vikas Pari…	2	12	2	2	12	2
31 Ct-14-21-parexel.pdf .txt.csv	53300	CTRI/2021/04/032791 [Registered on: 13/04/2021] Trial Registered Prospectively	- M S Ramaiah Medical College & Hospitals, M S Ramaiah Nagar, MSRIT Post, Bangalore-560054, Karnataka, India. Ethics Committee: M S Ramaiah Medical College & Hospitals, M S Ramaiah Nagar, MSRIT Post, Bangalore-560054,Karnataka, India. ECR/215/Inst/KA/2013/RR-19. Name of investigator: Dr. Anil Kumar T. - Clinical Research Room, Department of General Medicine, King George Hospital, Andhra Medical C…	Site 1 : Acharya Vinoba Bhave Rural Hospital Datta Meghe Institute Of Medical Sciences,SawangiWardhaMAHARASHTRA. Name of principal investigator: Dr Sunil Kumar. Site 2 : Fortis Hospitals Limited Level 5, Clinical research department, Mulund Goregaon Link Road, Bhandup (W),400078MumbaiMAHARASHTRA. Name of principal investigator: Dr Anita Mathew. Site 3 : Government Medical College and Hospital Dep…	10	15	8	10	15	7
Sr. No. 66-CT-57-21-Pfizer.pdf .txt.csv	57794	CTRI/2021/10/037186 [Registered on: 08/10/2021] Trial Registered Prospectively	- Tata Memorial Centre, Dr. E Borges road, Pare!, Mumbai- 4000 Ethics committee details: Institutional Ethics Committee I / II, 3rd Floor, Main building. Tata Memorial Hospital, Dr E Borges Road, Parel, 4000 ECR number: ECR/149/lnst/MH/2013/RR-16. Name of the investigator: Dr. Vikas Suresh Chand Ostwal - Rajiv Gandhi Cancer Institute and Research Centre, Sector-5, Rohini, New Delhi -110085 Ethics…	Site 1 : Bhaktivedanta Hospital & Research Institute Clinical Research Department, 5th floor, Bhaktivedanta Hospital & Research Institute , Srishti Complex, Bhaktivedanta Swami Marg, Mira road ( E), Thane – 401107, Maharashtra, India.ThaneMAHARASHTRA. Name of principal investigator: Dr Nirmal Vivek Raut. Site 2 : Department of Medical oncology Room no. 14-15, 1st Floor, Clinical research room, De…	7	7	7	7	7	7
Sr. No. 127 CT-132-21-veeda.pdf .txt.csv	62025	CTRI/2021/12/038651 [Registered on: 15/12/2021] Trial Registered Prospectively	1. Jawaharlal Institute of Postgraduate Medical Education and Research (JIPMER), Dhanvantari Nagar, Puducherry-605006, Institutional Ethics Committee, Interventional Studies, Dean Research Office, Administrative Block (1st floor), JIPMER Puducherry-605006, ECR/342/Inst/PY/2013/RR-19, Dr. Sandhiya Selvarajan. 2. Panimalar Medical College and Research Institute, Varadharajapuram, Poonamallee, Chenn…	Site 1 : RIMS, Government medical college & Government General Hospital Department of General medicine, Govt. Medical college & Govt. General hospital, (Old RIMSGGH), Srikakulam-532001, Andhra Pradesh, India.SrikakulamANDHRA PRADESH. Name of principal investigator: Dr K Sunil Naik. Site 2 : ARTEMIS hospital Sector-51, Gurgaon, Haryana, India-122001.GurgaonHARYANA. Name of principal investigator: …	3	14	3	3	14	3
Sr. No. 1 CT-119-21-Parexel.pdf .txt.csv	63939	CTRI/2022/02/039887 [Registered on: 01/02/2022] Trial Registered Prospectively	"1. Rhythm Heart Institute-A Unit of Synergy Lifecare Pvt. Ltd., Near Siddharth Bunglows, Sama-Savli Road, Vadodara-390022, Gujarat. Ethics committee details: Rhythm Heart Institute Ethics Committee, Near Siddharth Bunglows, Sama-Savli Road, Vadodara-390022, Gujarat. ECR number: ECR/104/Inst/GJ/2013/RR-20. Name of Investigator: Dr. Nirav Chandulal Bhalani.", "2. Vishwaraj Hospital, Consultant Phy…	Site 1 : Rhythm Heart Institute- A Unit of Synergy Lifecare Pvt. Ltd., Clinical Research Department Room No. 101, Near Siddharth Bunglows, Sama-Savli Road, 390022VadodaraGUJARAT. Name of principal investigator: Dr Nirav Chandulal Bhalani. Site 2 : VishwaRaj Hospital, 4th Floor, Clinical Research Department, Pune Solapur Road, near Loni Kalbhor railway station, Kadamwakwasti– 412201PuneMAHARASHTRA…	2	2	2	2	2	2
69.pdf .txt.csv	64031	CTRI/2022/03/041271 [Registered on: 22/03/2022] Trial Registered Prospectively	"- Unique Hospital Multispecialty & Research Institute, Opp. Kiran Motor, Nr. Canal, Civil Hospital Char Rasta- Sosyo Circle Lane, Off Ring Road, Surat- 395002, Gujarat. Ethics Committee: Unique Hospital Multispecialty & Research Institute, EC Reg. No.: ECR/595/Inst/GJ/2014/RR20. Principal Investigator: Dr Tanveer Maksud.", "- Erode Cancer Centre Pvt.Ltd, 1/393,Velavan Nagar, Perundurai Road, Thi…	Site 1 : AIIMS Medical Oncology Department, Fifth Floor OPD building, AIIMS, Jodhpur, Rajasthan -342005, India JodhpurRAJASTHAN. Name of principal investigator: Dr Pramod kumar. Site 2 : All India Institute of Medical Sciences Department of Medical Oncology,Dr.B.R.A,I.R.C.H,All India Institute of Medical Sciences(AIIMS),Ansari Nagar,New Delhi,110029,India New DelhiDELHI. Name of principal investi…	5	50	5	5	50	4
Sr. No. 93 CT-98-21-Navitas.pdf .txt.csv	64241	CTRI/2022/01/039274 [Registered on: 10/01/2022] Trial Registered Prospectively	"1. Government Medical College and Hospital, Medical College Square Road, Nagpur-440003, Maharashtra, India. Ethics committee details: Institutional Ethics Committee, Department of Pharmacology, Government Medical College & Hospital, Medical College Square Road, Nagpur-440003, Maharashtra, India. ECR number: ECR/43/Inst/MH/2013/RR-19. Name of the investigator: Dr. Rajesh Vithal Gosavi.", "2. JLN …	Site 1 : Chettinad Hospital and Research Institute Department of Pharmacology, Rajiv Gandhi Salai, KelambakkamChennaiTAMIL NADU. Name of principal investigator: Dr ArunKumar Radhakrishnan. Site 2 : Government Medical College & Hospital Professor of Medicine, Medical College Square RoadNagpurMAHARASHTRA. Name of principal investigator: Dr Rajesh Vithal Gosavi. Site 3 : Medanta the Medicity Departm…	3	3	2	3	3	2
Sr. No. 48 CT-162-21-Pfizer.pdf .txt.csv	64719	CTRI/2022/04/042263 [Registered on: 28/04/2022] Trial Registered Prospectively	1. Artemis Hospital, Sector 51, Gurugram-122001, Haryana, India Artemis Health Sciences Institutional Ethics Committee, Artemis Hospital, Sector 51, Gurugram-122001, Haryana, India ECR/53/Inst/HR/2013/RR-19 Dr. Vineet Govinda Gupta 2. Dr. B. R. Ambedkar Institute Rotary Cancer Hospital, All India Institute of Medical Sciences, Ansari Nagar, New Delhi, Delhi-110029, India Institute Ethics Committe…	Site 1 : Artemis Hospital Dept. of Medical Oncology, Sector 51, Gurgaon, Haryana- 122001GurgaonHARYANA. Name of principal investigator: Dr Vineet Govinda Gupta. Site 2 : Dr B. R Ambedkar Institute Rotary Cancer Hospital Room No. 216, 2nd floor, Dr. B.R.A Institute - Rotary Cancer Hospital ;All India Institute of Medical Sciences, Ansari Nagar, New Delhi -110029. New DelhiDELHI. Name of principal …	4	4	4	4	4	4
Sr. No. 82 CT-33-21-CBCC.pdf .txt.csv	63848	CTRI/2021/12/038848 [Registered on: 22/12/2021] Trial Registered Prospectively	1. Malla Reddy Narayana Multispecialty Hospital, Suraram X Roads, Jeedimetla, Quthbullapur, Telangana, Hyderabad 500055 Institutional Ethics Committee, Malla Reddy Medical College for Women Suraram X Roads, Quthbullapur, Municipality, Jeedimetla, Hyderabad, Telangana-500055, India Dr. K. Praveen 2.St. George,s Hospital, P’D Mello Road, Fort Road, CST Terminal, Mumbai-400001 Institutional Ethics C…	Site 1 : Belagavi Institute of Medical Sciences Dr. B R Ambedkar Road, Belagavi -590001, Karnataka, India BelgaumKARNATAKA. Name of principal investigator: Dr Sandeep Dandin. Site 2 : BGS Global Institute of Medical Sciences and Hospital No: 67, BGS Health & Education City, Uttarahalli Main Road, Kengeri, Bangalore – 560060, Karnataka, IndiaBangaloreKARNATAKA. Name of principal investigator: Dr Y…	2	7	2	2	7	2
Sr. No. 64 CT-29-22-Ms. AstraZeneca.pdf .txt.csv	68635	CTRI/2022/08/044748 [Registered on: 18/08/2022] Trial Registered Prospectively	1. HCG Cancer Center, Holy Cross Road, I. C. Colony, Off Dahisar New Link Road, Borivali West, Mumbai 400092 HCG Cancer Centre Institutional Ethics Committee, HCG Cancer Centre, Holy Cross Road, IC Colony, Off BorivaliDahisar New Link Road, Borivali West, Mumbai 400092 ECR/1468/Inst/MH/2020 Dr. Indoo Ambulkar 2. MVR Cancer Centre and Research Institute, CP 13/516 B.C /Vellalasseri, NIT (Via), Poo…	Site 1 : BHAGWAN MAHAVEER CANCER HOSPITAL & RESEARCH CENTRE Department of Medical Oncology BHAGWAN MAHAVEER CANCER HOSPITAL & RESEARCH CENTRE Jawahar Lal Nehru Marg, Bajaj Nagar,PIN 302017JaipurRAJASTHAN. Name of principal investigator: Dr Deepak Gupta. Site 2 : HCG Cancer Centre, Ahmedabad. Department of Medical Oncology Near Sola Science City Road, Near Sola Bridge, Sola, Ahmedabad- PIN: 380060…	7	7	7	7	7	7
Sr. No. 17 CT-168-21-Glenmark.pdf .txt.csv	66871	CTRI/2022/03/041216 [Registered on: 21/03/2022] Trial Registered Prospectively	"- Hindusthan Hospital, 522/3, 523/3 Nava India Road Udaiyampalayam, Coimbatore - 641028, Tamil Nadu, India. Institutional Human Ethics Committee, Hindusthan Hospital 522/3, 523/3 Nava India Road, Udaiyampalayam, Coimbatore-641028, Tamil Nadu, India. ECR/1376/Inst/TN/2020. Dr. Srikanth Krishnamurthy. - Maharaja Agrasen Superspeciality Hospital, Central Spine, Sector 7, Vidyadhar Nagar, Jaipur-302…	Site 1 : ACE Hospital & Research Centre Sector No. 8/4/1, Yashwant Apartment, Shop No: 07, Lane No: 04, Karve Nagar, Pune-411052PuneMAHARASHTRA. Name of principal investigator: Dr Himanshu Pophale Shashikant. Site 2 : Apollo Spectra Hospital Apollo Specialty Hospital Pvt Ltd 14/138 Chunniganj Mall Road Kanpur-208001Kanpur NagarUTTAR PRADESH. Name of principal investigator: Dr Sandeep Katiyar. Sit…	5	63	5	5	63	5
Sr. no. 104 CT-68-22-Sunpharma.pdf .txt.csv	70432	CTRI/2023/04/051333 [Registered on: 06/04/2023] Trial Registered Prospectively	1. All India Institute of Medical Sciences, Ansari Nagar, New Delhi Institutional Ethics Committee AIIMS, Ansari Nagar, New Delhi-110029, Delhi, India ECR/538/Inst/DL/2014/RR-20 Dr. Uma Kumar 2. Chennai Meenakshi Multispeciality Hospital Ltd, New # 70, Old # 149, Luz Church Road, Mylapore, Chennai, Tamil Nadu 600004, India Chennai Meenakshi Multispeciality Hospital Ethics Committee , New # 72, Ol…	Site 1 : 7-Orange Hospital Pawana Nagar Housing Society, Chinchwad, Pimpri-Chinchwad, Maharashtra 411033 PuneMAHARASHTRA. Name of principal investigator: Dr Girish Bhatia. Site 2 : Chanre Rheumatology and Immunology Center and Research No. 414/65 , 20th Main, West of Chord Road 1st block , Rajajinagara, Bangalore 560010 BangaloreKARNATAKA. Name of principal investigator: Dr Chandrashekara Srikant…	6	9	3	6	9	3
Sr. No. 74 Ct-44-22-Ms. PPD.pdf .txt.csv	72861	CTRI/2022/09/045929 [Registered on: 27/09/2022] Trial Registered Prospectively	- All India Institute of Medical Sciences, Department of Paediatrics Neurology, Teaching Block, 3rd Floor, Ansari Nagar, New Delhi - 110029, India. Ethics Committee Details: Institute Ethics Committee, All India Institute of Medical Sciences Room No. 102, Old O.T. Block, All India Institute of Medical Sciences, Ansari Nagar, New Delhi -29, South Delhi-110029. ECR/538/Inst/DL/2014/RR-20. Name of I…	Site 1 : All India Institute of Medical Sciences Dept of Paediatrics Neurology, Teaching Block, 3rd Floor, Room # 3056, Ansari Nagar, New-Delhi - 110029, India New Delhi DELHI New DelhiDELHI. Name of principal investigator: Dr Shefali Gulati. Site 2 : Aster RV Hospital 4th Floor, Department of Paediatrics, CA, #37, 24th main road, ITI Layout, 1st Phase, J.P Nagar, Bengaluru, Karnataka -560078, In…	5	5	5	5	5	5
Sr. No. 7 CT-56-22-Ms. Parexel.pdf .txt.csv	74304	CTRI/2023/02/049538 [Registered on: 08/02/2023] Trial Registered Prospectively	"1. Dept. of Nephrology, Nizam’s Institute of Medical Sciences, Hyderabad-500082, Telangana, India. Ethics committee details: Nizam’s Institute Ethics Committee (NIEC), Nizam’s Institute of Medical Sciences, Hyderabad-500082, Telangana, India. ECR/303/Inst/AP/2013/RR-19. Name of the investigator: Dr. D. Sree Bhushan Raju." "2. Max Super Speciality Hospital (East Block), (A Unit of Devki Devi Foun…	Site 1 : Apollo Hospitals Department of Cardiology, Flat No 1/16 & 1/17, Second Floor, Krishna deep Chambers (Apollo Annexe), No.21, Greams Lane, Off Greams Road, Chennai 600 006 Tamil Nadu, India ChennaiTAMIL NADU. Name of principal investigator: Dr Abraham Oomman. Site 2 : Institute of PGME and Research and Seth Sukhlal Karnani Memorial Hospital Department of Nephrology, 244 Acharya J. C. Bose …	8	8	8	8	8	8
Sr.No. 93 CT-83-22-Ms. IRInnovate CTNOC.pdf .txt.csv	76147	CTRI/2022/12/048496 [Registered on: 26/12/2022] Trial Registered Prospectively	1. Unique Hospital Multispeciality and Research Institute, Opp. Kiran Motor, Nr. Canal, Civil Hospital Char Rasta, Sosyo Circle Lane, off Ring Road, Surt 395002, Gujarat Unique Hospital Corporate Office, B-9 Shivkrupa Society, Ambanagar, Behind Unique Hospital, Surat 395002, Gujarat Ethics Committee Unique Hospital Multispeciality and Research Institute, Opp. Kiran Motor, Nr. Canal, Civil Hospita…	Site 1 : Acharya Vinoba Bhave Rural Hospital Sawangi Meghe, Wardha-442001, Maharashtra, IndiaWardhaMAHARASHTRA. Name of principal investigator: Dr Sameeksha Dubey. Site 2 : All India Institute of Medical Sciences,Bhubaneshwar All India Institute of Medical Sciences, Sijua, Patrapada Bhubaneshwar 751019 Odisha, IndiaKhordhaORISSA. Name of principal investigator: Dr Sourav Kumar Mishra. Site 3 : Ja…	6	10	4	6	10	4
Sr. No. 103 CT-92-22-Lotus lab.pdf .txt.csv	76976	CTRI/2022/12/048623 [Registered on: 30/12/2022] Trial Registered Prospectively	:", "1. Sir Ganga Ram Hospital, Department of Dermatology, SRGH Marg, Rajinder Nagar-110060, New Delhi. Ethics Committee Details: Ethics Committee, Sir Ganga Ram Hospital, Sir Ganga Ram Hospital, Room no. 1643, 6h floor, Casualty Building, Old Rajinder Nagar-110060, New Delhi. ECR number: ECR/138/Inst/DL/2013. Name of Investigator: Dr. Rohit Batra." "2. GMERS Medical College and Civil Hospital So…	Site 1 : Amrita Institute of Medical Sciences and Research Centre Dept of Dermatology, AIMS Ponekkara P.O Kochi, Kerala, India-682041ErnakulamKERALA. Name of principal investigator: Dr Vinitha Varghese Panicker. Site 2 : Assured Care Plus Hospital Department of Dermatology 4th & 5 th Floor Star Plus Complex, Lam Road, Opposite to NMC Divisional Office, Near Muktidham Temple, Nashik Road, Nashik, …	10	10	10	10	10	9
79.pdf .txt.csv	79976	CTRI/2023/03/050804 [Registered on: 17/03/2023] Trial Registered Prospectively	- Gleaneagles Global Hospitals, 6-1-1070/1 to 4, Hyderabad - 500004, Telangana, India. Ethics Committee Details: Institutional Ethics Committee Gleneagles Global Hospitals, 6-1-82/83, Global life building, 6th floor, Lakdikapool, Hyderabad. ECR number: ECR/158/Inst/AP/2013/RR-19. Name of Principal Investigator: Dr. N.Y. Prashanth Chandra. - Aware Gleaneagles Global Hospitals, #08-16-01, Sagar Roa…	Site 1 : Aayush Hospital 102-1, 1st floor, laxman Arcade, Vivekanand Co-Op Hsg Society, 90 feet Rd, DharaviMumbaiMAHARASHTRA. Name of principal investigator: Dr Dnyaneshwar R Waghmare. Site 2 : Aware Gleneagles Global Hospitals 08-16-01, Sagar X Roads, Saroornagar, LB NagarHyderabadTELANGANA. Name of principal investigator: Dr Srinivasa Chary. Site 3 : Gleneagles Global Hospitals 6-1-1070/1 to 4,…	4	11	2	4	11	1
Sr. No. 26 Ct-136-22-AstraZeneca.pdf .txt.csv	82128	CTRI/2023/04/051492 [Registered on: 11/04/2023] Trial Registered Prospectively	"1. Jawaharlal Institute of Postgraduate Medical Education and Research (JIPMER), JIPMER Campus Road, Dhanvantari Nagar, Gorimedu, Puducherry, 605-006, India, Ethics committee details: JIPMER Institutional Ethics Committee-Interventional Studies, Room No. 103, First Floor, Administrative Block, JIPMER, Puducherry, ECR/342/Inst/PY/2013/RR-19, Name of investigator: Dr. Sreejith Parameswaran.", "2. …	Site 1 : Jawaharlal Institute of Postgraduate Medical Education and Research (JIPMER) Department of Nephrology, JIPMER Campus Road, JIPMER Campus, Dhanvantari Nagar, Puducherry – 605006 PondicherryPONDICHERRY. Name of principal investigator: Dr Sreejith Parameswaran. Site 2 : K D Hospital Department of Nephrology, Vaishnavdevi Circle, S.G.Highway, Ahmedabad Gujarat – 382421AhmadabadGUJARAT. Name …	5	6	5	5	6	5
Sr. No. 3 CT-91-22-J&J.pdf .txt.csv	76611	CTRI/2023/02/049676 [Registered on: 13/02/2023] Trial Registered Prospectively	1.CIMS Hospital Pvt Ltd Plot No 67/1, Opp. Panchamrut Bunglows, Near Shukan Mall, Off. Science City Road, Sola, Ahmedabad, 380060, Ethics Committee Of Care Institute Of Medical Science, CIMS Hospital Pvt Ltd Plot No 67/1, Opp. Panchamrut Bunglows, Near Shukan Mall, Off. Science City Road, Sola, Ahmedabad, 380060. ECR/1359/CIMS/lnst/GJ/2013/RR-2019 Dr. Urmil Shah 2. Sardar Vallabhbhai Patel Instit…	Site 1 : CARE Hospitals Cardiology Department, ground floor, Road No. 01, Banjara Hills, Hyderabad- 50034, Telangana.HyderabadTELANGANA. Name of principal investigator: Dr BKS Sastry. Site 2 : CIMS HOSPITAL PVT LTD Cardiology Department, first floor, PLOT NO 67/1,OPP.PANCHAMRUT BUNGLOWS,NEAR SHUKAN MALL,OFF.SCIENGE CITY ROAD,SOLA,AHMEDABAD-380060AhmadabadGUJARAT. Name of principal investigator: D…	7	12	7	7	12	7
Sr. No. 19 CT-126-22-Ms. Novotech.pdf .txt.csv	77167	CTRI/2023/03/050971 [Registered on: 22/03/2023] Trial Registered Prospectively	1. Nirmal Hospital Pvt. Ltd., Ring Road, Surat-395002, Gujarat, India Nirmal Hospital Pvt. Ltd. Ethics Committee, Nirmal Hospital Pvt. Ltd., Ring Road, Surat-395002, Gujarat, India ECR/390/Inst/GJ/2013/RR-19 Dr. Ghanshyam Patel 2. Tata Memorial Hospital, Dr. E. Borges Road, Parel, Mumbai-400012 Institutional Ethics Committee, 3rd Floor, Main Building, Tata Memorial Hospital, Parel, Mumbai IEC-I :…	Site 1 : All India Institute Of Medical Sciences AIIMS, IRCH, Department of Medical Oncology, Room 216New DelhiDELHI. Name of principal investigator: Dr Sameer Rastogi. Site 2 : Jawaharlal Institute of Postgraduate Medical Education & Research (JIPMER) JIPMER Campus Rd, Gorimedu, Dhanvantari Nagar, Puducherry, 605006PondicherryPONDICHERRY. Name of principal investigator: Dr Smita Kayal. Site 3 : …	10	10	10	10	10	10
Aurigene.pdf .txt.csv	43518	CTRI/2020/07/026870 [Registered on: 29/07/2020] Trial Registered Prospectively	- Site 1: Dr. Deepam Pushpam, Department of Medical Oncology, Dr. BRA Institute Rotary Cancer Hospital, All India Institute of Medical Sciences, Ansari Nagar, New Delhi - 110029. Ethics Committee registration number: ECR/538/INSTlDLl2017/RR-17. - Site 2: Dr. Kumar Prabhash, Tata Memorial Hospital, 204, OPD 2nd Floor, HomiBhabha Block, Dr. Ernest Borges Road, Parel, Mumbai - 4000 Ethics Committee …	Site 1 : All India Institute of Medical Sciences, New Delhi Dr.BRA Institute Rotary Cancer Hospital, All India Institute of Medical Sciences, Room No.243, Department of Medical Oncology, Anasari Nagar, New Delhi-10029, India.New DelhiDELHI. Name of principal investigator: Dr Deepam Pushpam. Site 2 : Basavatarakam Indo American Cancer Hospital & Research Institute Road No 10, Banjara Hills, Hydera…	3	12	3	3	12	3
Sr. No. 46 Ct-37-20-Novartis.pdf .txt.csv	44407	CTRI/2020/09/027647 [Registered on: 08/09/2020] Trial Registered Prospectively	- Vijan Hospital & Research Centre (Vijan Cardiac & Critical Care Centre), Dr. Vijan Hospital Marg, College Road, Nashik-422005, Maharashtra, India. Ethics committee details: Vijan Hospital Ethics Committee, ECR/406/Inst/MH/2013/RR-19, Name of investigator: Dr. Rahul Bhimrao. - Shree Mahant Indiresh Hospital, Patel nagar Dehradun-248001, Uttarakhand. Ethics committee details: Institutional Ethics…	Site 1 : Chopda Medicare & Research Centre Pvt.Ltd; Magnum Heart Institute, 3/5, Patil Lane no.1 Laxmi nagar,Near KBH Vidyalaya, Canada Corner, Nashik- 422005, MaharashtraNashikMAHARASHTRA. Name of principal investigator: Dr Amit Bhalchandra Yeole. Site 2 : GB Pant hospital Jawaharlal Nehru Marg New Delhi- 110002New DelhiDELHI. Name of principal investigator: Dr Debashish Chowdhury. Site 3 : Sanj…	5	5	5	5	5	4
Dacomitinib.pdf .txt.csv	44617	CTRI/2020/07/026825 [Registered on: 27/07/2020] Trial Registered Prospectively	01 Dr Chanchal Goswami Medica Superspecialty Hospital,127, Mukundapur, Committee E.M. Bypass,Kolkata West Bengal-700099 Clinical Research Ethics Shatabdi Hospital Shatabdi Arjun 02 Dr Shailesh Apex Wellness Hospital, Superspeciality Hospital, Bondarde Survey, No. 799, Plot No. 187, Behind Prakash Petrol pump, Govind Nagar Nashik Maharashtra -422009 Sahyadri hospitals Vishwasrao 03 Dr Tushar Vishw…	Site 1 : Gujarat Hospital Gastro and Vascular Centre Opposite Shree Ram Petrol Pump, Anand Mahal Road, Adajan, Surat, Gujarat – 395009, IndiaSuratGUJARAT. Name of principal investigator: Dr Jayanti Patel. Site 2 : Apex Wellness Hospital Survey No. 799, Plot No. 187, Behind Prakash Petrol pump, Govind Nagar, Nashik – 422009, Maharashtra, IndiaNashikMAHARASHTRA. Name of principal investigator: Dr S…	5	14	5	5	14	5
Lorlatinib.pdf .txt.csv	44626	CTRI/2020/07/026826 [Registered on: 27/07/2020] Trial Registered Prospectively	- Site 01: Medica Superspecialty Hospital, , Mukundapur, E.M. Bypass, Kolkata, West Bengal-700099; Ethics Committee: Clinical Research Ethics Committee; ECR number: ECR/.../...; Investigator: Dr. Chanchal Goswa, - Site 02: Dr. Shailesh Apex Wellness Hospital, Shatabdi Hostel, Behind Prakash Petrol Pump, Govind Nagar, Maharashtra-422009; Ethics Committee: Shatabdi Hospital Superspeciality Ethics C…	Site 1 : Apex Wellness Hospital Survey No. 799, Plot No. 187, Behind Prakash Petrol pump, Govind Nagar, Nashik – 422009, Maharashtra, IndiaNashikMAHARASHTRA. Name of principal investigator: Dr Shailesh Arjun Bondarde. Site 2 : Artemis Hospital Sector 51, Gurugram - 122001, Haryana, IndiaGurgaonHARYANA. Name of principal investigator: Dr Vineet Govinda Gupta. Site 3 : Bhaktivedanta Hospital and Re…	5	12	5	5	12	5
Sr. No. 14 Ct-174-21-Sasnofi.pdf .txt.csv	45462	CTRI/2020/11/029237 [Registered on: 19/11/2020] Trial Registered Prospectively	"- Artemis Hospitals, Sector-51, Gurugram-001, Haryana\nEthics committee details: Artemis health Sciences Institutional Ethics Committee, Artemis Health Institute, Sector-51, Gurugram-001, Haryana ECR/53/Inst/HR/2013/RR-2019 Name of investigator: Dr. Manish Mahajan", "- Department of Neurology, Government Medical College, Medical College P.O, Thiruvananthapuram, Kerala-695011, India\nEthics commi…	Site 1 : Artemis Hospital Sector 51, Gurugram, Haryana 122001, India GurgaonHARYANA. Name of principal investigator: Dr Manish Mahajan. Site 2 : Fortis Hospital Fortis Memorial Research Institute situated at Fortis Memorial Research Institute Fortis Memorial Research Institute Sector-44, Gurugram Haryana - 122002GurgaonHARYANA. Name of principal investigator: Dr Praveen Gupta. Site 3 : Government…	6	6	6	6	6	6
Sr. No. 36-Ct-18-20-Novotech.pdf .txt.csv	45482	CTRI/2020/09/028172 [Registered on: 30/09/2020] Trial Registered Prospectively	- B.J. Government Medical College and Sassoon General Hospital, Jayprakash Narayan Road, Near Pune Railway Station, Pune-411001, Maharashtra, India. Ethics committee details: Institutional Ethics Committee of B.J. Government Medical College and Sassoon General Hospitals, Department of Pharmacology B.J. Government Medical College and Sassoon Road, Pune-411001. ECR number: ECR/657/Inst/MH/2014/RR-1…	Site 1 : Acharya Vinoba Bhave Rural Hospital Datta Meghe Institute of Medical Sciences, Sawangi (Meghe), Wardha 442004, MaharashtraWardhaMAHARASHTRA. Name of principal investigator: Dr Vijendra Kirnake. Site 2 : Ahmedabad Bariatrics & Cosmetics Private Limited (Asian Bariatrics) S. No. 235/2, B/s. Tata Motors Showroom Opposite Rajpath Club S.G. Highway, Bodakdev, Ahmedabad-380015,Gujarat, Ahmadab…	9	14	9	9	14	6
Sr. No. 36 CT-179-21-Sanofi.pdf .txt.csv	45641	CTRI/2020/11/029092 [Registered on: 12/11/2020] Trial Registered Prospectively	"1. Sir Ganga Ram Hospital, Old Rajinder Nagar, New Delhi-110060. Ethics committee details: Sir Ganga Ram Hospital Ethics Committee, Sir Ganga Ram Hospital, Old Rajinder Nagar, New Delhi - 110060. ECR/20/Inst./DL/2013/RR-19. Name of the investigator: Dr. Anshu Rohatgi.", "2. Fortis Memorial Research Institute situated at Fortis Memorial Research Institute Fortis Memorial Research Institute Sector…	Site 1 : All India Institute of Medical Sciences (AIIMS) - The Neurosciences (N.S) Centre Sri Aurobindo Marg, Ansari Nagar, Ansari Nagar East, New Delhi, Delhi 110029, IndiaSouth WestDELHI. Name of principal investigator: Dr M V Padma. Site 2 : Artemis Hospital Sector 51, Gurugram, Haryana 122001, IndiaGurgaonHARYANA. Name of principal investigator: Dr Manish Mahajan. Site 3 : Brain Clinic Jaslee…	9	9	9	9	9	9
cadila healthcare26feb.pdf .txt.csv	46020	CTRI/2021/09/036874 [Registered on: 27/09/2021] Trial Registered Prospectively	- Name of Principal Investigator & Trial Sites: Dr Koradia Parshottam Govindbhai , BAPS Pramukh Swami Hospital, Adajan Cross Road, Near Country Club, Adajan, Surat-395009, Gujarat, India. - Ethics Committee Name: Ethics Committee, BAPS Pramukh Swami Hospital, Adajan Cross Road, Near Country Club, Adajan, Surat-395009, Gujarat, India. - Registration Number: ECR/639/Inst/GJ/2014/RR-17.	Site 1 : Anand Multispecialty Hospital B-Tower sundervan complex, Gorwa Refinery Road, near Gorwa, beside IOCL petrol pump, Gorwa, Vadodara, Gujarat 390016VadodaraGUJARAT. Name of principal investigator: Dr Patel Jeet Hemantkumar. Site 2 : Indian Institute of Liver & Digestive Sciences Sitala East, IILDS, Hospital Rd., Rajpur Sonarpur, Kolkata700150KolkataWEST BENGAL. Name of principal investigat…	1	6	0	1	6	0
rdna15.pdf .txt.csv	47467	CTRI/2020/11/028814 [Registered on: 02/11/2020] Trial Registered Prospectively	- Site 1: AIIMS, Department of Rheumatology, Room No. 4076, 4077, Fourth Floor, Teaching Block, Ansari Nagar, NewDelhi‐110029, India. Ethics Committee Details: Ethics Committee, AIIMS, Room No. 102, 1st Floor Old, O.T Block, Ansari Nagar, New Delhi -110029. ECR/538/Inst/DL/2014/RR‐17. Name of Principal Investigator: Dr. Danveer Bhadu. - Site 2: SRMC, Sri Ramachandra Institute of Higher Education …	Site 1 : All India Institute of Medical Sciences Department of Rheumatology Room No. 4076, 4077, Fourth Floor, Teaching Block All India Institute of Medical Sciences Ansari Nagar, New Delhi-110029, India New DelhiDELHI. Name of principal investigator: Dr Danveer Bhadu. Site 2 : Apollo Gleneagles Hospital Department of medicine & Clinical trial Unit- AGH 58, Canal Circular Road Kolkata- 700054 Wes…	4	5	4	4	5	4
15 CT-117-20-Medpace.pdf .txt.csv	51934	CTRI/2021/04/032702 [Registered on: 09/04/2021] Trial Registered Prospectively	- ChanRe Rheumatology & Immunology Center & Research, No. 414/65, 20th Main, West of Chord Road, 1st Block, Rajajinagar, Bengaluru-560010, Institutional Ethics Committee, ChanRe Rheumatology & Immunology Center & Research, ECR/190/Inst/KR/2013/RR-19, Dr. Chandrashekara Srikantiah. - Sahyadri Super Speciality Hospital, 30C, Erandwane, Karve Road, Pune-411004, Maharashtra, India, Sahyadri Clinical …	Site 1 : Nizam Institute of Medical Sciences Nizams Institute of Medical Sciences Department of Neurology, Millennium Block, Punjagutta, 500082HyderabadTELANGANA. Name of principal investigator: Dr Rukimini Mridula Kandadai	4	1	1	4	1	1
33 CT-136-20-Novo-nordisk.pdf .txt.csv	52161	CTRI/2021/06/034501 [Registered on: 30/06/2021] Trial Registered Prospectively	- Name and address of clinical trial site: Department Of Pediatrics, Maulana Azad Medical College and Associated Lok Nayak Hospital, Bahadur Shah Zafar Marg, New Delhi-110002. - Ethics committee details: Institutional Ethics Committee, Maulana Azad Medical College and associated Lok Nayak Hospital Room number 304, Maulana Azad Medical College, Bahadur Shah Zafar Marg, New Delhi- 110002. - ECR num…	Site 1 : Endolife Speciality Hospital Private Limited D.No:12-12-94,Old Club Road,Kothapeta,Guntur-522001,Andrapradesh,India.GunturANDHRA PRADESH. Name of principal investigator: DrSrikanth Kongara. Site 2 : Maulana Azad Medical College Department of Pediatrics, Maulana Azad Medical College, Bahadur Shah Zafar Marg, New Delhi-110002NorthDELHI. Name of principal investigator: DrAashima Dabas	1	2	1	1	2	1
sr. No. 72 CT-103-20- J&J.pdf .txt.csv	58058	CTRI/2021/09/036588 [Registered on: 16/09/2021] Trial Registered Prospectively	- Maulana Azad Medical College & Associated Lok Nayak Hospital, Bahadur Shah Zafar Marg, New Delhi-110002, India; Institutional Ethics Committee, Maulana Azad Medical College & Associated Lok Nayak Govind Ballabh Pant Hospitals & Guru Nanak Eye Centre, Bahadur Shah Zafar Marg, New Delhi-110002; ECR number: ECR/4/Inst/DL/2020; Name of Investigator: Dr. Raghvendra Singh. - Sir Ganga Ram Hospital, S…	Site 1 : Datta Meghe Institute of Medical Sciences Clinical Research Division, Block A, First Floor, Sawangi Meghe Wardha, Maharashtra 442004WardhaMAHARASHTRA. Name of principal investigator: Dr Amar Mohanrao Taksande. Site 2 : Dr. D.Y.Patil Medical College, Hospital and Research Center, Sant Tukaram Nagar, Pimpri, Pune-411018PuneMAHARASHTRA. Name of principal investigator: Dr Sharad Agarkhedkar.…	9	9	9	9	9	9
Sr. No. 110 CT-75-21-Pfizer-CTNOC.pdf .txt.csv	62488	CTRI/2022/01/039107 [Registered on: 04/01/2022] Trial Registered Prospectively	1. Nirmal Hospital Pvt. Ltd., Department of Paediatrics, Ring Road, Surat-395002, Gujarat, India Nirmal Hospital Pvt. Ltd Ethics Committee, Nirmal Hospital Pvt. Ltd., Ring Road, Surat-395002, Gujarat, India ECR/390/Inst/GJ/2013/RR-19 Dr. Nirmalkumar Ganeshmal Choraria	Site 1 : Nirmal Hospital Private Limited Department of Pediatrics, Nirmal Hospital Private Limited,Ring Road, Surat – 395002, Gujarat, IndiaSuratGUJARAT. Name of principal investigator: Dr Nirmalkumar Ganeshmal Choraria. Site 2 : Sahyadri Super specialty Hospital Department of Heamatology, 30C, Erandwane, karve Road, Pune-411004PuneMAHARASHTRA. Name of principal investigator: Dr Shashikant Janard…	1	2	1	1	2	1
Sr. No. 95 CT-86-21-medpace.pdf .txt.csv	62517	CTRI/2021/11/038040 [Registered on: 15/11/2021] Trial Registered Prospectively	- Unity Hospital, Near D.R. World, Opp. Raghuvir Business Empire, Aai Mata Rd, Parvat Patiya, Surat-395010, Gujarat, India; Ethics committee details: Unity Hospital Ethics Committee, Unity Trauma Center And ICU, N-4 Janki Park Society, Aai Mata Rd, Parvat Patiya, Surat-395010, Gujarat, India; ECR/6/Inst/GJ/2019; Name of investigator: Dr. Maheshkumar Vithalbhai Sutariya. - Grant Medical Foundation…	Site 1 : Aakash Healthcare Pvt. Ltd. Clinical research room, block 1, service floor, Aakash Healthcare Pvt. Ltd., Hospital Plot Road No. 201, Sector -3, Dwarka New Delhi-110075 New DelhiDELHI. Name of principal investigator: Dr Akshay Budhraja. Site 2 : BAPS Pramukh Swami Hospital Ground floor, Clinical Research Department , BAPS Pramukh Swami Hospital, Shri Pramukh Swami Maharaj Marg, Adajan Cha…	7	7	7	7	7	7
Sr. No. 133 CT-148-21-Star genomics.pdf .txt.csv	64589	CTRI/2022/05/042562 [Registered on: 13/05/2022] Trial Registered Prospectively	"1. Manipal Hospital, # 98, HAL Airport Road, Bangalore-560017, Karnataka, India. Ethics committee details: Ethics Committee of Manipal Hospitals, Manipal Hospital, 98, HAL Airport Road, Bangalore-560017, Karnataka, India. ECR/34/Inst/KA/2013/RR-19. Name of the investigator: Dr. Poonam Patil.", "2. Advani Olickal Health Care Services, 3rd Floor, Sushrut Hospital and Research Centre, 365 Swatik Pa…	Site 1 : All India lnstitute of Medical Sciences, Ansori Nagor Room no. 702, first floor, Old O T Block, Ansari Nogor East, New Delhi, Delhi 110029South WestDELHI. Name of principal investigator: Dr Sachin Khurana. Site 2 : Chittaranjan National Cancer Institute, Street Number 299, DJ Block(Newtown), Action Area I, Newtown, New Town, West Bengal 700156, IndiaKolkataWEST BENGAL. Name of principal …	3	19	3	3	19	3
Sr. No. 77-CT-98-20-Covance.pdf .txt.csv	65453	CTRI/2022/03/041246 [Registered on: 22/03/2022] Trial Registered Prospectively	1. HCG Manavata Cancer Centre, Behind Shivang Auto, Mumbai Naka, Nashik-22002, Maharashtra, ECR/383/Inst/MH/2013, Dr. Rajnish Vasant Nagarkar 2. Shatabdi Hospital, Suyojit Centre, Opp Mahamarga Bus Stand, Mumbai Naka, Nashik-422005, Maharashtra, ECR/114/Inst/MH/2013, Dr. Shailesh Arjun Bondarde 3. Cytecare Hospital Pvt. Ltd., Venkatala, Near Begalur Cross, Yelahanka, Bengaluru-560064, ECR/556/Ins…	Site 1 : Amrita Institute of Medical Sciences (AIMS) Dept of Medical Oncology and Haematology, AIMS Ponekkara P.O., Cochin 682041, Kerala, IndiaErnakulamKERALA. Name of principal investigator: Dr Wesley M Jose. Site 2 : Apex Wellness Hospital Survey No 799, Plot No l87, Behind Prakash petrol pump, Govind Nagar, Nashik 422009, Maharashtra, India.NashikMAHARASHTRA. Name of principal investigator: D…	7	7	6	7	7	5
Sr. No. 134 CT-117-21.pdf .txt.csv	65794	CTRI/2022/03/040959 [Registered on: 09/03/2022] Trial Registered Prospectively	1.Artemis Hospital, Sector 51, Gurugram,122001, Haryana, India Artemis Health Sciences Institutional Ethics Committee, Artemis Hospital, Sector 51, Gurugram, 122001, Haryana, India ECR/53/Inst/HR/2013/RR-19 Dr. Vineet Govinda Gupta 2.Sri Ram Cancer and Superspeciality Centrer, Mahatma Gandhi University of Medical Sciences and Technology, RIICO Institutional Area, Sitapura, Tonk Road, Jaipur-30202…	Site 1 : All India Institute of Medical Science, Department of Medical Oncology, All India Institute of Medical Sciences, Veerbhadra Marg, Rishikesh, Uttarakhand- 249203 DehradunUTTARANCHAL. Name of principal investigator: Dr Amit Sehrawat. Site 2 : Apex Wellness Hospital Department of Medical Oncology Survey no 799, Plot no 187, Behind prakash petrol pump Govind Nagar, Nashik 422009, Maharashtra…	12	13	11	12	13	11
Sr. No. 98 CT-70-22-Pharm-Olam.pdf .txt.csv	75197	CTRI/2023/01/048838 [Registered on: 09/01/2023] Trial Registered Prospectively	1. Unity Trauma Centre and ICU (Unity Hospital), Nr. D.R World, Opp. Raghuvir Business Empire, Aai Mata Road, Parvat Patiya, Surat, Gujarat-395010. Ethics committee details: Unity Hospital Ethics Committee, Unity Trauma Centre and ICU, N-4 Janki Park Society, Aai Mata Road, Parvat Patiya, Surat, Gujarat-395010. ECR number: ECR/1067/Inst/GJ/2017. Name of the investigator: Dr. Mahesh Vithalbhai Sut…	Site 1 : Ashirwad Hospital and Research Centre Maratha Section Near Jijamata Udhyan Ulhasnagar 421004 Maharashtra India ThaneMAHARASHTRA. Name of principal investigator: Dr Shrikant Deshpande. Site 2 : Atharva Multispecialty Hospital and Research Centre H4 Comm 2 Construction DIV-21 Avas Vikas Parishad IIM Road Lucknow 226003 Uttar Pradesh India LucknowUTTAR PRADESH. Name of principal investigato…	4	10	4	4	10	4
3Atropine Sulfate Ophthalmic Solution-SUn Pharma.pdf .txt.csv	79182	CTRI/2023/01/049169 [Registered on: 24/01/2023] Trial Registered Prospectively	1. Dr. Perwez Khan, Room No.01, Ground Floor, Department of Ophthalmology, GSM Medical College, Swaroop Nagar, Kanpur— 208002, Uttar Pradesh, India. Ethics Committee: GSVM Medical College. ECR/680/Inst/UP/2014/RR-20. 2. Dr. Purvi Raj Bhagat, M&J Institute of Ophthalmology, 113, Glaucoma Department, First Floor, Manjushri Mill compound, Asarwa, Ahmedabad -16, Gujarat, India. Institutional Ethics C…	Site 1 : Ambade Eye Hospital 1st floor, Kamal tower, Near Jaswant Talkies, Indora Chowk, Kamptee road, Nagpur-440017, Maharashtra IndiaNagpurMAHARASHTRA. Name of principal investigator: Dr Ajay Kartik Ambade. Site 2 : Amrita Institute of Medical Sciences and Research Centre Dept. of Ophthalmology, Ground floor, Tower-1, Room No: 7, AIMS-Ponekkara. P.O. Kochi -682041, Kerala, IndiaKollamKERALA. Na…	10	15	7	10	15	6
Sr. No. 9 CT-133-22-AstraZeneca.pdf .txt.csv	82095	CTRI/2023/04/051363 [Registered on: 06/04/2023] Trial Registered Prospectively	1. Sunrise Hospitals (A Unit of NS Health Care Services Pvt. Ltd), Opp. Corporation Bank, Bellapu Sobhanadri Road, Near Pushpa Hotel Centre, Vijayawada-520002, Andhra Pradesh, India Institutional Ethics Committee Sunrise Hospital, Opp. Corporation Bank, Bellapu Sobhanadri Road, Near Pushpa Hotel Centre, Vijayawada-520002, Andhra Pradesh, India ECR/756/Inst/AP/2015/RR-21 Dr. Krishna M.V. S 2. Max …	Site 1 : K D Hospital Department of Nephrology, Vaishnavdevi Circle, S.G.Highway, Ahmedabad Gujarat – 382421AhmadabadGUJARAT. Name of principal investigator: Dr Kamal Goplani. Site 2 : Max Super Speciality Hospital Department of Nephrology, 1, Press enclave Road, Saket, New Delhi – 110017New DelhiDELHI. Name of principal investigator: Dr Dinesh Khullar. Site 3 : Meenakshi Mission Hospital & Resea…	7	7	7	7	7	7
98Pfizer.pdf .txt.csv	41040	CTRI/2020/03/023849 [Registered on: 09/03/2020] Trial Registered Prospectively	: - Nirmal Hospital Pvt. Ltd., Department of Pediatrics, Ring Road, Surat- 395002, Gujarat, India. Ethics committee details: Nirmal Hospital Private Limited Ethics Committee, Nirmal Hospital Pvt. Ltd., Ring Road, Near Centre Point, Surat-395002, Gujarat, India. ECR/390/Inst/GJ/2013/RR-19, ECR/390/Inst/GJ/2013/RR-16. Name of the investigator: Dr. Nirmalkumar Ganeshmal Choraria. - Sahyadri Clinical…	Site 1 : K J Somaiya Hospital and Research Center Somaiya Ayurvihar Complex, Eastern Express Hwy, Sion East, Mumbai - 400022MumbaiMAHARASHTRA. Name of principal investigator: Dr Savita Rangarajan. Site 2 : Nirmal Hospital Pvt Ltd Department of Pediatrics, Ring Road, Surat- 395002SuratGUJARAT. Name of principal investigator: Dr Nirmalkumar Ganeshmal Choraria. Site 3 : Sahyadri Super Specialty Hosp…	3	3	3	3	3	3
sr. No. 24 Ct-15-20-george Clinical.pdf .txt.csv	42626	CTRI/2020/09/027892 [Registered on: 18/09/2020] Trial Registered Prospectively	1.Smt G R Doshi and Smt. K M Mehta Institute of Kidney Diseases and Research Center and Dr. H L Trivedi Institute of Transplantation Sciences (IKDRC-ITS), Civil Hospital Campus, Asarwa, Ahmedabad 380016, Gujarat, India IKDRC-ITS Ethics Committee, IKDRC-ITS, Civil Hospital Campus, Asarwa, Ahmedabad 380016, Gujarat, India ECR/143/Inst/GJ/2013/RR-19 Dr. Vivek Kute 2.Sir Ganga Ram Hospital, Sir Ganga…	Site 1 : Christian Medical College, Vellore Nephrology Department, Third Floor, Consultation Room, CMC, IDA Scudder Rd, Vellore, Tamil Nadu 632004VelloreTAMIL NADU. Name of principal investigator: Dr Suceena Alexander. Site 2 : Govt Medical College Kozhikode Department of Nephrology, Super speciality Block, Kozhikode, 673008KozhikodeKERALA. Name of principal investigator: Dr Sreelatha M. Site 3 :…	13	13	13	13	13	13
CT-11-2020.pdf .txt.csv	44433	CTRI/2020/09/027594 [Registered on: 04/09/2020] Trial Registered Prospectively	" :1. Name and Address of Clinical Trial Site: Syngene International Limited, Human Pharmacology Unit, Clinical Development Tower – 1, Semicon Park Electronics City Phase II Bangalore – 560 100, India.Ethics Committee details: People Tree Hospitals Ethics Committee, People Tree Hospitals, 2, Tumkur Road, Goraguntepalya, Yeshwantpur, Bangalore-560022, India.ECR number: ECR/1008/Inst/KA/2017\nName …	Site 1 : Syngene International Limited Human Pharmacology Unit, Syngene International Limited, Clinical Development, Tower I, Semicon Park, Electronic City Phase II, Hosur Road BangaloreKARNATAKA. Name of principal investigator: Dr Anil K	1	1	1	1	1	1
Sr. No. 31 CT-21-20-JSS Medical.pdf .txt.csv	44557	CTRI/2020/07/026721 [Registered on: 21/07/2020] Trial Registered Prospectively	Details of clinical trial sites: - All India Institute of Medical Sciences (AIIMS) Rishikesh, Rishikesh, 249203, Uttarakhand, India. Ethics committee details: Institutional Ethics Committee, All India Institute of Medical Sciences (AIIMS) Rishikesh, Department of Physiology, Veerbhadra Marg, Rishikesh, Uttarakhand-249201. ECR/736/Inst/UK/2015/RR-16. Name of investigator: Dr. Uttam Kumar Nath. - H…	Site 1 : All India Institute of Medical Sciences Veerbhadra Road Shivaji Nagar, Near Barrage, Sturida Colony, Rishikesh, Uttarakhand-249203, IndiaDehradunUTTARANCHAL. Name of principal investigator: Dr Uttam Kumar Nath. Site 2 : Christian Medical College & Hospital Brown Rd, CMC Campus, Ludhiana, Punjab 141008LudhianaPUNJAB. Name of principal investigator: Dr Joseph John. Site 3 : Hemato-Oncology…	4	6	4	4	6	4
CT-12-2020.pdf .txt.csv	44660	CTRI/2020/06/026086 [Registered on: 23/06/2020] Trial Registered Prospectively	Details of clinical trial sites: 1. Department of Pediatrics, Niloufer Hospital (Affiliated to Osmania Medical College), Red Hills, Baazar Ghat, Lakdikapool, Hyderabad-500004, Telangana, Institutional Ethics Committee, Osmania Medical College, Koti, Hyderabad – 500095, Telangana, ECR/300/Inst/AP/2013/RR-19, Dr. N. Ravi Kumar 2. Pt. B. D. Sharma Post Graduate Institute of Medical Sciences, Rohtak-…	Site 1 : Government Medical College & Hospital, Nagpur Department of Medicine, Government Medical College & Hospital, Medical College Square, Hanuman Nagar, Nagpur-440003, MaharashtraNagpurMAHARASHTRA. Name of principal investigator: Dr Rashmi Nagdeve. Site 2 : Institute of Medical Sciences (IMS) & SUM Hospital, Bhubaneshwar Department of Community Medicine, Institute of Medical Sciences (IMS) & …	9	7	7	9	7	6
CT-13-2020.pdf .txt.csv	44948	CTRI/2020/07/026930 [Registered on: 31/07/2020] Trial Registered Prospectively	1. Pediatric Research Cell, Department of Pediatrics, Bharati Vidyapeeth (Deemed to be University) Medical College & Hospital, Pune-Satara Road, Katraj-Dhankawadi, Pune-411043, Maharashtra, India. Ethics Committee details: Institutional Ethics Committee BVDU, Bharathi Vidyapeeth Hospital & Research Centre, Pune, ECR/313/Inst/MH/2013/RR-19. Name of Principal Investigator: Dr. Rahul Jahagirdar. 2. …	Site 1 : Bharati Vidyapeeth (Deemed to be University) Medical College & Hospital Pediatric Research Cell, Department of Pediatrics, Bharati Vidyapeeth (Deemed to be University) Medical College & Hospital , Pune-Satara Road, Katraj-Dhankawadi, Pune-411043PuneMAHARASHTRA. Name of principal investigator: Dr Rahul Jahagirdar. Site 2 : Gandhi Medical College and Hospital Department of Pediatrics, Gand…	6	6	6	6	6	6
59IQVIA.pdf .txt.csv	46964	CTRI/2020/10/028183 [Registered on: 01/10/2020] Trial Registered Prospectively	- Sir Ganga Ram Hospital, Marg, Rajinder Nagar, New Delhi-110060, Ethics Committee details: Sir Ganga Ram Hospital Ethics Committee, Room No. 1496, 4th Floor, Old Building, Sir Ganga Ram Hospital, Rajinder Nagar, New Delhi -110060, ECR/20/Inst/DL/2013/RR-2019, Name of investigator: Dr. Anshu Rohtagi. - Max Super Specialty Hospital, 1, Press Enclave Road, Saket, New Delhi -110017, Ethics Committee…	Site 1 : Mallikatta Neuro Centre 3rd floor, Neurology department, Super Specialty building,Opp.MallikattaCircle Kadri Mangalore-575002 Karnataka IndiaBangalore RuralKARNATAKA. Name of principal investigator: Dr Shankara Nellikunja. Site 2 : Max Super Speciality Hospital Ground floor, Neurology department,Saket(West Block), 1 Press Enclave Road, Saket, New Delhi-110017, India. New DelhiDELHI. Name…	7	5	5	7	5	5
CT-26-2020.pdf .txt.csv	51189	CTRI/2021/02/031160 [Registered on: 09/02/2021] Trial Registered Prospectively	: - Site 1: Bharati Vidyapeeth Medical College & Hospital, Pune-Satara Road, Katraj-Dhankawadi, Pune-411043, Maharashtra, India Ethics Committee details: Institutional Ethics Committee BVDU, Bharathi Vidyapeeth Hospital & Research Centre, Pune, [ECR/313/Inst/MH/2013/RR-19] Name of Principal Investigator: Dr. Sonali Palkar	Site 1 : Bharati Vidyapeeth (Deemed to be University) Medical College & Hospital Pediatric Research Cell, Department of Pediatrics, Bharati Vidyapeeth (Deemed to be University) Medical College & Hospital , Pune-Satara Road, Katraj-Dhankawadi, Pune-411043, Maharashtra, IndiaPuneMAHARASHTRA. Name of principal investigator: Dr Sonali Palkar. Site 2 : Vedant Multispecialty Hospital, Department of Med…	1	2	1	1	2	1
4.BBIL Intranasal .pdf .txt.csv	51327	CTRI/2021/02/031295 [Registered on: 15/02/2021] Trial Registered Prospectively	: - Site 1: Apollo Speciality Hospital, #21, Greams Lane, Chennai, Ethics Committee details: Institutional Ethics Committee-Clinical Studies, Apollo Speciality Hospital, #21, Greams Lane, Chennai, ECR/37/Inst/TN/2013/RR-19, Name of Principal Investigator: Dr. C Jagadeesh. - Site 2: Felix Hospital, Sector 137, NOIDA, Uttar Pradesh, 201305, Ethics Committee details: Institutional Ethics Committee F…	Site 1 : Apollo Speciality Hospital Internal Medicine Department, Sindoori Fourth Floor Division , Room number-54 Apollo Hospitals, No-21 Greams Lane, off Greams road,Chennai-600006 ChennaiTAMIL NADU. Name of principal investigator: Dr Jagadeesh Chandrasekaran. Site 2 : Gillurkar multispeciality Hospital Department Of Medicine, OPD 3, First Floor, Gillurkar Multispeciality Hospital, 20, Reshimbag…	4	4	3	4	4	3
4Ct-118-20-Bayer.pdf .txt.csv	51824	CTRI/2021/03/032172 [Registered on: 19/03/2021] Trial Registered Prospectively	1. HCG Cancer Center, Sola Science City Road, Nr. Sola Bridge, S.G. Highway, Ahmedabad-380060, Gujarat, India, ECR/92/Inst/GJ/2013/RR-19, Dr. Ashish Kaushal 2. Christian Medical College and Hospital, Department of Medical Oncology, Ludhiana-141008, Punjab, India, Institutional Ethics Committee, Christian Medical College and Hospital, Brown Road, Ludhiana, Punjab-141008, ECR//Inst/PB/2013/RR-19, D…	Site 1 : All India Institute of Medical Sciences Room # 133, Dr. Bhimrao Ambedkar Institute of Rotary Cancer Hospital (Dr BRA IRCH), Ansari Nagar, New Delhi-110029, Delhi, IndiaNew DelhiDELHI. Name of principal investigator: Dr Haresh KP. Site 2 : All India Institute of Medical Sciences (AIIMS) Sijua, Patrapaday, Bhubaneswar-751019, Orissa, IndiaKhordhaORISSA. Name of principal investigator: Dr S…	11	24	11	11	24	11
18 Ct-109-20-Bayer.pdf .txt.csv	53671	CTRI/2021/03/032071 [Registered on: 17/03/2021] Trial Registered Prospectively	: 1. Max Super Specialty Hospital, Saket, New Delhi-110017, India, Institutional Ethics Committee Max Super Specialty Hospital, Saket (East Block), (A Unit of Devki Devi Foundation) Service Floor, Office of Ethics Committee, 2, Press Enclave Road, Saket, New Delhi-110017, India, ECR/110/Inst/DL/2013/RR-19, Dr. Vijay Kumar Chopra 2. Govind Ballabh Pant Institute of Postgraduate Medical Education a…	Site 1 : Deenanath Mangeshkar Hospital and Research Center, Department of Cardiology, 3rd Floor OPD Super Specialty Building, Near Mhatre Bridge Erandwane Pune 411004PuneMAHARASHTRA. Name of principal investigator: Dr Shireesh Sathe. Site 2 : Healthworld Hospitals Department of Cardiology, C-49, Commercial Area, Opp. ESIC Sub-Regional Office, City Centre, Durgapur - 713216BarddhamanWEST BENGAL. N…	5	7	3	5	7	3
Sr. no. 53 CT-59-21-Novartis.pdf .txt.csv	54954	CTRI/2021/11/038171 [Registered on: 22/11/2021] Trial Registered Prospectively	1. Room No. 14 IVth Floor, Old Building, Sir Ganga Ram Hospital, Sir Ganga Ram Hospital Marg, Rajinder Nagar, New Delhi-110060, Ethics committee details: Sir Ganga Ram Hospital Ethics Committee, Room No. 1496, IVth Floor, Old Building, Sir Ganga Ram Hospital, Rajinder Nagar, New Delhi-110060, ECR/20/Inst/DL/2013/RR-19, Name of investigator: Dr. Anshu Rohatgi. 2. Max Super Speciality Hospital Sake…	Site 1 : Amrita Institute of Medical Sciences Ponekkara, Kochi, 682041 Kerala IndiaKozhikodeKERALA. Name of principal investigator: DrVinayan KP. Site 2 : Institute of Neurosciences Dept of Neurology,Kolkata, 185/1 AJC BOSE ROAD,Kolkata 700017 KolkataWEST BENGAL. Name of principal investigator: Dr Hrisikesh Kumar. Site 3 : MAX SUPERSPECIALITY HOSPITAL Dept of Neurology,Saket West Block, 1 PRESS E…	5	5	4	5	5	3
12_ BBIL 2-18.pdf .txt.csv	56105	CTRI/2021/05/033752 [Registered on: 24/05/2021] Trial Registered Prospectively	: 1. Meditrina Institute of Medical Sciences, Nagpur, Ethics Committee details: Meditrina Institute Ethics Committee, ECR number: ECR/4/Inst/MH/2013, Name of Principal Investigator: Dr. Vasant M Khalatkar. 2. AIIMS, Patna, Bihar, Ethics Committee details: Institutional Ethics Committee, All India Institute of Medical Science Patna Bihar -801507, ECR number: ECR/4/Inst/BH/2013, Name of Principal I…	Site 1 : All India Institute of Medical Sciences Patna Room No 105 Type 4 Block 2 Department of Paediatrics Aurangabad Road Phulwari SharifPatnaBIHAR. Name of principal investigator: Dr Chnadramani SIngh. Site 2 : All India Institute of Medical Scienecs Delhi Department of center for community medicine Room no 29 Old OT block, AIIMS News DelhiNew DelhiDELHI. Name of principal investigator: Dr San…	4	6	2	4	6	1
Sr. No. 73 CT-43-21-Medpace.pdf .txt.csv	60307	CTRI/2021/10/037121 [Registered on: 06/10/2021] Trial Registered Prospectively	- Muljibhai Patel Urological Hospital, Dr. Virendra Desai Road, Nadiad, Gujarat-387001, Ethics Committee: Muljibhai Patel Society for Research in Nephro-Urology Ethics Committee, ECR/276/Muljibhai/Inst/GJ/2013/RR-19, Name of investigator: Dr. Sishir Dashrathmal Gang - Deep Kidney Care, Opp. Deep Hospital, Model Town, Ludhiana, Ethics Committee: Institutional Ethics Committee Deep Hospital, ECR/52…	Site 1 : Christian Medical College and hospital, Department of Nephrology, Ida Scudder road, Vellore-632004.VelloreTAMIL NADU. Name of principal investigator: Dr Suceena Alexander. Site 2 : Deep Hospital, Deep Kidney Care, Opp. Deep hospital, Model Town, Ludhiana-141002, PunjabLudhianaPUNJAB. Name of principal investigator: Dr Rajan Isaacs. Site 3 : Government Medical College, Thiruvananthapuram,…	9	9	9	9	9	9
Sr. No. 124 CT-89-21-PSI CRO.pdf .txt.csv	60794	CTRI/2021/12/038483 [Registered on: 07/12/2021] Trial Registered Prospectively	1.HCG Cancer Centre, HCG Double Road, No. 44-45/2, 2nd Cross, Rajaram Mohan Roy Extension, Bengaluru-560027, Karnataka, India HCG Central Ethics Committee, HCG-Bangalore Institute of Oncology, HCG Towers, Tower 1, 1st Floor, No. 8, P. Kalinga Rao Rd, Sampangi Ram Nagar, Bengaluru-560027, Karnataka, India ECR/386/Inst/KA/2013/RR-19 Dr. K Govind Babu 2. All India Institute of Medical Sciences, Depa…	Site 1 : All India Institute of Medical Sciences Department of Nuclear Medicine, Ansari Nagar East, Gautam Nagar, New Delhi-110029, IndiaNew DelhiDELHI. Name of principal investigator: Dr Chandrasekhar Bal. Site 2 : HCG Cancer Centre HCG Double Road, No- 44-45/2, 2nd Cross, Rajaram Mohan Roy Extension, Bengaluru-560027, Karnataka, India BangaloreKARNATAKA. Name of principal investigator: Dr K Gov…	3	3	3	3	3	3
Sr. No. 6 Ct-102-21-Qascent Research.pdf .txt.csv	62893	CTRI/2022/03/040775 [Registered on: 03/03/2022] Trial Registered Prospectively	1.Kala Azar Medical Research Centre (KAMRC), Rambagh Rd, Mahammadpur Kazi, Chandwara, Muzaffarpur 842002, Bihar, India Institutional Ethics Committee, Kala- .Azar Medical Research Centre, Rambag Road, Muzaffarpur-842002, Bihar, India ECR/291/Inst/BH/2013/RR-19 Prof. (Dr.) Shyam Sundar 2.Rajendra Memorial Research Institute of Medical Sciences (RMRIMS) – ICMR, Department of Health Research, Minist…	Site 1 : Kala Azar Medical Research Centre (KAMRC) Rambagh Road, Mahammadpur Kazi, Chandwara, Muzaffarpur-842002 Bihar, IndiaMuzaffarpurBIHAR. Name of principal investigator: Prof Dr Shyam Sundar. Site 2 : Rajendra Memorial Research Institute of Medical Sciences (RMRIMS) ICMR, Department of Health Research, Ministry of Health & Family Welfare Govt. of India. Agamkuan, Patna-800007, Bihar, IndiaPa…	2	2	2	2	2	2
Sr. No. 41 CT-152-21-Novo-Nordisk.pdf .txt.csv	62932	CTRI/2022/04/042104 [Registered on: 22/04/2022] Trial Registered Prospectively	1. Shree Mahavir Health and Medical Relief Society, Shri Bachubhai Dahyabhai Mehta Mahavir Heart Institute, Shree Mahavir Health Campus, Athwagate, Ring Road, Surat 395001, Gujarat, India Shri B D Mehta Mahavir Heart Institute Ethics Committee, Shree Mahavir Health Campus, Athwagate, Opp, Vanita Vishram Ground, Athwagate, Ring Road, Surat 395001, Gujarat, India ECR/850/Inst/GJ/2016/RR-20 Dr. Atul…	Site 1 : Osmania Medical College and General Hospital Department of Cardiology, 15-5-104, Begum Bazar, Afzal Gunj, Hyderabad, Telangana - 500012.HyderabadTELANGANA. Name of principal investigator: Dr Krishna Mala Konda Reddy. Site 2 : S.P. Medical college & A G Hospitals Department of Cardiology, Bikaner, Rajasthan- 334003.BikanerRAJASTHAN. Name of principal investigator: Dr Devendra K Agarwal. S…	7	9	7	7	9	7
Sr. No. 109 CT-73-21-Astrazeneca.pdf .txt.csv	63231	CTRI/2022/04/041578 [Registered on: 01/04/2022] Trial Registered Prospectively	1.Acharya Vinoba Bhave Rural Hospital, Jawaharlal Nehru Medical College, Datta Meghe Institute of Medical Sciences, Sawangi (Meghe), Wardha 442001, Maharashtra, India Institutional Ethics Committee, Datta Meghe Institute of Medical Sciences (DU), Sawangi (Meghe), Wardha-442004, Maharashtra, India ECR/440/Inst/MH/2013/RR-19 Dr. Vijendra V. Kirnake 2. Max Smart Super Speciality Hospital, Mandir Mar…	Site 1 : Aakash Healthcare Super Specialty Hospital Dept. of Gastroenterology Hospital Plot, Rd Number 201, Dwarka Sector-3, PIN-110075New DelhiDELHI. Name of principal investigator: Dr Sharad Malhotra. Site 2 : Acharya Vinoba Bhave Rural Hospital Dept. of Gastroenterology Jawaharlal Nehru Medical College, Datta Meghe Institute of Medical Sciences, Sawangi Meghe, Wardha-442004WardhaMAHARASHTRA. N…	10	10	10	10	10	10
Sr. No. 117 CT-123-21-Astrazeenca.pdf .txt.csv	63297	CTRI/2022/01/039210 [Registered on: 06/01/2022] Trial Registered Prospectively	1.Artemis Hospital, Sector 51, Gurugram,122001, Haryana, India Artemis Health Sciences Institutional Ethics Committee, Artemis Hospital, Sector 51, Gurugram, 122001, Haryana, India ECR/53/Inst/HR/2013/RR-19 Dr. Vineet Govinda Gupta 2.Regional Cancer Centre Medical College Campus, Post Bag number; 2417 Thiruvananthapuram, Kerala- 695011 Human Ethics Committee, First Floor, Regional Cancer Centre, …	Site 1 : All India Institute of Medical Sciences Dept. of Medical Oncology Veerbhadra Marg Rishikesh-249203 (Uttarakhand), India. Name of principal investigator: Dr Amit Sehrawat. Site 2 : Artemis Hospital Dept. of Medical Oncology Sector 51, Gurugram,122001 GurgaonHARYANA. Name of principal investigator: Dr Vineet Govinda Gupta. Site 3 : Deep Hospital Dept. of Medical Oncology 481, Model Town, L…	10	14	10	10	14	9
Sr. No. 67 Ct-176-21-Ms. Novartis.pdf .txt.csv	63940	CTRI/2022/09/045669 [Registered on: 19/09/2022] Trial Registered Prospectively	1.Sir Ganga Ram Hospital, Sir Ganga Ram Hospital Marg, Rajinder Nagar, New Delhi 110060, India Sir Ganga Ram Hospital Ethics Committee Sir Ganga Ram Hospital Old Rajinder Nagar New Delhi 110060, India ECR/20/Inst/DL/2013/RR-19 Dr. Anshu Rohatgi 2.Noble Hospital Clinical Research Department, Noble Annex, Noble Hospital Pvt. Ltd., 153A, Magarpatta City Road, Hadapsar, Pune 411013, Maharashtra, Indi…	Site 1 : Chopda Medicare & Research Centre Pvt Ltd, Magnum Heart Institute, 3/5, Patil Lane No 1, Laxmi Nagar, Near K B H Vidyalaya, Canada Corner, Nashik-422005,Maharashtra, India Chopda Medicare & Research Centre Pvt Ltd, Magnum Heart Institute, Clinical Research Department, Flat No 10, Laxmanrekha Apartment, Behind Magnum Heart Institute, Patil Lane No. 1, Canada Corner, Nashik- 422005, Mahara…	5	8	0	5	8	0
Sr. o. 53 CT-16-22-Novo-Nordisk.pdf .txt.csv	64489	CTRI/2022/05/042825 [Registered on: 26/05/2022] Trial Registered Prospectively	: - Department of Paediatrics, J K Loan Hospital, Attached to SMS Medical College, Jaipur-302004. Ethics committee details: Ethics Committee SMS Medical College & Attached Hospitals, JLN Marg, Jaipur, Rajasthan-302004, India. ECR number: ECR/26/Inst/RJ/2013/RR-19. Name of the investigator: Dr. Kapil Garg. - Sahyadri Super Speciality Hospital, 30C, Erandwane, Karve Road- Pune-411004, Maharashtra, …	Site 1 : J K Lon Hospital Department of Paediatrics, J K Lon Hospital, Attached to SMS Medical college -302004JaipurRAJASTHAN. Name of principal investigator: Dr Kapil Garg. Site 2 : Nirmal Hospital Pvt Ltd Ring Road, Surat – 395002SuratGUJARAT. Name of principal investigator: Dr Nirmalkumar Ganeshmal Choraria. Site 3 : Post Graduate Institute of Child Health Department of Pediatric Hematology-On…	2	4	2	2	4	2
Sr. No. 34 CT-135-21-Pfizer.pdf .txt.csv	65754	CTRI/2022/04/041752 [Registered on: 08/04/2022] Trial Registered Prospectively	1. All India Institute of Medical Sciences, Dept. of Pediatrics, Division of Pediatric Rheumatology, Ansari Nagar, New Delhi 110029 IEC Room No. 102, Old O.T. Block, All India Institute of Medical Sciences, Ansari Nagar, New Delhi-110029 ECR/538/Inst/DL/2014/RR-17 Dr. Narendra Kumar Bagri 2. Sir Ganga Ram Hospital, Room No. 1194, First Floor, Old building, Sir Ganga Ram Hospital, Old Rajinder Nag…	Site 1 : All India Institute of Medical Sciences Division of Pediatric Rheumatology, Ansari Nagar, 110029, New Delhi, India New DelhiDELHI. Name of principal investigator: Dr Narendra Kumar Bagri. Site 2 : Institute of Child Health Department of Pediatrics Rheumatology, Dr Biresh Guha St, Park Circus, Ballygunge, Kolkata, West Bengal 700017, India KolkataWEST BENGAL. Name of principal investigato…	5	5	5	5	5	5
Sr. No. 43 Ct-13-22-IQVIA.pdf .txt.csv	66668	CTRI/2022/04/042014 [Registered on: 21/04/2022] Trial Registered Prospectively	1. NKP Salve Institute of Medical Sciences and Lata Mangeshkar Hospital, Digdoh Hills, Hingana Road, Nagpur 440019 Institutional Ethics Committee, NKP Salve Institute of Medical Sciences and Lata Mangeshkar Hospital, Digdoh Hills, Hingana Road, Nagpur- 440019 ECR/88/Inst/MH/2013/RR-19 Dr. Sushil Yashwant Pande 2. Nirmal Hospital Pvt. Ltd., Ring Road, Surat 395002, Gujarat, India Nirmal Hospital P…	Site 1 : B.J. Medical College and Civil Hospital Department of Dermatology, Asarwa - 380016AhmadabadGUJARAT. Name of principal investigator: Dr Bela Jaswantlal Shah. Site 2 : Calcutta School of Tropical Medicine Clinical Research Room, Ground Floor, 108, Chittaranjan Avenue, Medical College and Hospital, College Square - 700073KolkataWEST BENGAL. Name of principal investigator: Dr Saswati Halder.…	8	7	7	8	7	6
Sr. No. 33 CT-163-21-PPD.pdf .txt.csv	66960	CTRI/2022/04/042131 [Registered on: 25/04/2022] Trial Registered Prospectively	: - S.No. 1: Names and address of clinical trial site: Down town Hospital, Dispur, GS Road, Guwahati-781006, Assam. Ethics committee details: Ethics Committee, Down town Hospital, Dispur, GS Road, Guwahati – 781006, Assam. Name of Investigator: Dr. Swapnav Borthakur. - S.No. 2: Names and address of clinical trial site: GSVM Medical College, Swaroop Nagar, Kanpur-208002, Uttar Pradesh. Ethics comm…	Site 1 : Down town Hospital Department of Medicine, 2nd floor of 3rd building, Down Townn Hospital, G. S. Road, Dispur, Guwahati, Assam, India-781006KamrupASSAM. Name of principal investigator: Dr Swapnav Borthakur. Site 2 : GSVM Medical College Department of Medicine, room no. 20, ground floor, GSVM Medical College, Swaroop Nagar, Kanpur, Uttar Pradesh, India-208002Kanpur NagarUTTAR PRADESH. Nam…	4	4	4	4	4	4
Sr. No. 69 CT-40-22-Novartis.pdf .txt.csv	67297	CTRI/2022/07/044378 [Registered on: 27/07/2022] Trial Registered Prospectively	- Fortis Escorts Heart Institute, Okhla, New Delhi - 110025 Ethics committee details: Institutional Ethics Committee, Room No A-23, 2nd Floor, RC Building Residential Tower, Okhla Road New Delhi-110025, ECR/261/Inst/DL/2013/RR-19, Name of investigator: Dr. Mona Bhatia - Fortis Hospital, 730 Anandapur, EM Bypass Road, Kolkata, West Bengal-700107 Ethics committee details: Fortis Hospital Ethics Com…	Site 1 : All India Institute of Medical Sciences(AIIMS) Room no 97, 7th floor, Cardio Thoracic Sciences Center, Ansari Nagar, New Delhi-110029, IndiaEastDELHI. Name of principal investigator: Dr Ramakrishnan Sivasubramanian. Site 2 : Apollo Hospitals No 21, Greams Lane, Off Greams Lane Road, Chennai-600006, Tamil Nadu, IndiaChennaiTAMIL NADU. Name of principal investigator: Dr Abraham Oomman. Sit…	5	10	5	5	10	4
Sr. No. 4 CT-131-22-Ms. Pfizer.pdf .txt.csv	77315	CTRI/2023/02/049471 [Registered on: 06/02/2023] Trial Registered Prospectively	1. Nirmal Hospital Pvt. Ltd., Department of Pediatrics, Ring Road, Surat, Gujarat 395002, India Nirmal Hospital Pvt. Ltd. Ethics Committee, Nirmal Hospital Pvt. Ltd, Ring Road, Near Centre Point, Surat - 395002, Gujarat, India ECR/390/Inst/GJ/2013/RR-19 Dr. Nirmalkumar Ganeshmal Choraria 2. K J Somaiya Hospital and Research Centre, Somaiya Ayurvihar, Eastern Express Highway, Sion East, Mumbai-22 …	Site 1 : KJ Somaiya Hospital and Research Centre Somaiya Ayurvihar138, Eastern Express Highway, Sion East, Mumbai, Maharashtra 400022, IndiaMumbaiMAHARASHTRA. Name of principal investigator: Dr Savita Rangarajan. Site 2 : Nil ratan Sircar Medical College and Hospital 138-A.J.C. Bose Road Kolkata 700014 West Bengal, IndiaKolkataWEST BENGAL. Name of principal investigator: Dr Tuphan Kanti Dolai. Si…	3	3	3	3	3	3
Sr. No. 52 Ct-156-21-Ecron Acunova.pdf .txt.csv	77990	CTRI/2022/12/047937 [Registered on: 07/12/2022] Trial Registered Prospectively	1.Shanti Saroj Netralay, A. N. Gaikwad, 901/902, Besides Sundar Nagar, Anand Nursing Home, Road off Sangli Miraj, Rd Sangli, Maharashtra-416410 IEC- Mahatma Gandhi Cancer Hospital, Near Gulabrao Patil Homeopathic Medical College, Miraj Sangli, Maharashtra-416410, India ECR/1550/Inst/MH/2021 Dr Pooja Bhomaj 2.Rising Retina Clinic, 312- 313, Iscon Centre, Shivranjani Cross Roads, Satellite, Ahmedab…	Site 1 : M and J Western Regional Institute of Ophthalmology Civil Hospital Campus, Asarwa, Ahmedabad – 380016, Gujarat, IndiaAhmadabadGUJARAT. Name of principal investigator: Dr Purvi Raj Bhagat. Site 2 : Netralaya Super Speciality Eye Hospital 1st Floor, Kay DEE House, Above Union Bank, Parimal Garden Cross Road, Chimanlal Girdharlal Rd, Ambawadi, Ahmedabad-380006 Gujarat, India AhmadabadGUJARA…	2	4	1	2	4	1
Sr. No. 31 Ct-182-22-PPD.pdf .txt.csv	84325	CTRI/2023/05/053033 [Registered on: 22/05/2023] Trial Registered Prospectively	1. Govind Ballabh Pant Institute of Post Graduate Medical Education and Research 1, Jawahar Lal Nehru Marg, New Delhi 110002 Institutional Ethics Committee, Maulana Azad Medical College, MAMC Bahadur Shah Zafar Marg, New Delhi – 110002 ECR/329/Inst/DL/2013/RR-19 Dr. Debashish Chowdhury 2. Zydus Hospitals & Healthcare Research Pvt. Ltd., Zydus Hospital Road, S.G. Highway, Thaltej, Ahmedabad-380054…	Site 1 : All India Institute of Medical Sciences Room no 805, 8th floor, A wing, Mother and child block, AIIMS, Ansari Nagar, New Delhi- 110029New DelhiDELHI. Name of principal investigator: Dr Sheffali Gulati. Site 2 : Amrita Institute of Medical Sciences and Research Centre AIMS Ponekkara P.O, Kochi-682041, KeralaErnakulamKERALA. Name of principal investigator: Dr Vinayan KP. Site 3 : Artemis H…	9	9	9	9	9	9
66Novartis.pdf .txt.csv	44988	CTRI/2020/09/027575 [Registered on: 03/09/2020] Trial Registered Prospectively	- Noble Hospital Clinical Research Department, Noble Annex, Noble Hospital Pvt. Ltd. 153 A, Magarpatta City Road, Hadapsar, Pune - 411013, India. Ethics committee details: Noble Hospital Institutional Ethics Committee, Room No.5, Noble Hospital Clinical Research Department, Noble Annex, Noble Hospital Pvt.. Ltd. 153A, Magarpatta City Road, Hadapsar, Pune-411013, India. ECR/259/Inst/MH/2013/RR-19.…	Site 1 : Christian Medical College, Department of Medical Oncology, Ida Scudder Road, Vellore - 632004, Tamil Nadu, IndiaVelloreTAMIL NADU. Name of principal investigator: Dr Ashish Singh. Site 2 : Indraprastha Apollo Hopsital, Sarita Vihar, Delhi-Mathura Road, New Delhi-110076New DelhiDELHI. Name of principal investigator: Dr Manish Singhal. Site 3 : Noble Hospital Clinical Research Department N…	3	3	3	3	3	3
76Eli Lilly.pdf .txt.csv	46330	CTRI/2020/11/029312 [Registered on: 24/11/2020] Trial Registered Prospectively	- Sir Ganga Ram Hospital, SGRH Marg, Rajinder Nagar, New Delhi - 110060, India, Ethics committee details: Sir Ganga Ram Hospital Ethics Committee, ECR/20/INST/DL/2013/RR-2016, Name of investigator: Dr. Anshu Rohatgi - Artemis Hospitals, Sector-51, Gurgaon – 001, Haryana, India, Ethics committee details: Artemis health Sciences-Institutional Ethics Committee Artemis Hospitals, ECR/53/lnst/HR/2013/…	Site 1 : All India Institute of Medical Sciences Plot no. 2, Sector 20, 2nd Floor, Room no. 226, Department of Pediatrics, Sumantha, Mihan, Nagpur, 441108 – Maharashtra, IndiaNagpurMAHARASHTRA. Name of principal investigator: Dr Meenakshi Girish. Site 2 : All India Institute of Medical Sciences (AIIMS) Department of Neurology, Room No. 3, VI Floor, Neurosciences Centre, AIIMS. Ansari Nagar New De…	9	15	9	9	15	9
74Novartis.pdf .txt.csv	46451	CTRI/2020/09/027680 [Registered on: 09/09/2020] Trial Registered Prospectively	1. Rhythm Heart Institute- A Unit of Synergy Lifecare Pvt. Ltd., Near Siddharth Bunglows, Sama-Savli Road, Vadodara-390022, Gujarat. Ethics committee details: Rhythm Heart Institute Ethics Committee, ECR/224/Inst/GJ/2013/RR-19. Name of investigator: Dr. Nirav Bhalani. 2. National Institute of Medical Sciences and Research, Shobha Nagar, Jaipur-Delhi Highway, NH-11C Jaipur-303, Rajasthan. Ethics c…	Site 1 : Hindusthan Hospital Depart of Pulmonology, Hindusthan Hospital 522/3, 523/3 Nava India Road Udaiyampalayam Coimbatore-641028, Tamil Nadu, India CoimbatoreTAMIL NADU. Name of principal investigator: Dr Srikanth Krishnamurthy. Site 2 : National Institute of Medical Sciences and Research Depart of Respiratory, National Institute of Medical Sciences and Research, Shobha Nagar, Jaipur-Delhi H…	3	3	3	3	3	3
60Novo Nordisk.pdf .txt.csv	46476	CTRI/2020/09/027971 [Registered on: 22/09/2020] Trial Registered Prospectively	1. Endolife Speciality Hospital Pvt. Ltd., Dr-No: 94, Old Club Road, Kothapet, Guntur-522001, Andhra Pradesh. Ethics committee details: Institutional Ethics Committee Endolife Speciality Hospital, Endolife Speciality Hospitals Pvt. Ltd., Dr-No: 94, Old Club Road, Kothapet, Guntur-522001, Andhra Pradesh, India. ECR/647/Inst/AP/2014/RR-17. Name of Investigator: Dr. Srikanth Kongara. 2. P.D. Hinduja…	Site 1 : All India Institute of Medical Sciences (AIIMS) Room no 303, Biotechnology block,Dept of EndocrinologyNew DelhiDELHI. Name of principal investigator: Dr Rajesh Khadgawat. Site 2 : Endolife Speciality hospitals Room of Dr. K. Srikanth (Sr. Consultant), Ground Floor, Endolife Speciality hospitals, Old club road KothapetGunturANDHRA PRADESH. Name of principal investigator: Dr Kongara Srikan…	7	8	7	7	8	7
56-QED.pdf .txt.csv	47126	CTRI/2020/09/027897 [Registered on: 18/09/2020] Trial Registered Prospectively	1. Asthma Bhawan R-3, Sector-6, Vidhyadhar Nagar, Jaipur-302039, Rajasthan, India; Institutional Ethics Committee, Asthma Bhawan R-3, Sector-6, Vidhyadhar Nagar, Jaipur-302039, Rajasthan, India; ECR/750/Inst/RJ/2015/RR-18; Dr. Sharad Tikkiwal. 2. Ace Hospital & Research Center, Sr. No 32/2A, Erandawane, Gulwani Maharaj Road, Near Abhishek Hotel, Pune 411004, Maharashtra, India; AMAI Trust Ace Hos…	Site 1 : ACE Hospital & Research Centre Room No: 104 Ground Floor Ace Hospital & Research Center, Sr. No 32/2A, Erandawane, Gulwani Maharaj Road, Near Abhishek, Pune 411004 PuneMAHARASHTRA. Name of principal investigator: Dr Himanshu Pophale. Site 2 : AMCMET Medical College and Sheth LG General Hospital Near Rambaug Fire Station, Opposite Adani Petrol Pump, Rambaug, Maninagar - 380008, Gujarat, I…	8	13	6	8	13	6
Dienogest.pdf .txt.csv	47266	CTRI/2020/10/028556 [Registered on: 22/10/2020] Trial Registered Prospectively	- Dr. Shilpa Ghosh, Dept of Gynecology, Aakash Healthcare Superspeciality Hospital, Sector 3, Dwaraka, new Delhi-110075, Institutional Ethics Committee, Aakash Healthcare Superspeciality Hospital, Sector 3, Dwaraka, New Delhi, ECR/5/1nstlDU2019 - Dr. Pragya Pandey, Sudbhawan Hospital, B 31/80, 23B-Bhogabir Lanka Varansi- 221005 UP, Institutional Ethics Committee, Sudbhawan Hospital, B 31/80, 23B-…	Site 1 : AIIMS Bhubneshwar AIIMS Sijua, Patrapada, Bhubaneshwar, Odisha, 751019 IndiaKhordhaORISSA. Name of principal investigator: Dr Pruthwiraj Sethi. Site 2 : JawaharLal Nehru Medical College and Attached Hospital Department of Gynecology, Kala Bagh, Ajmer, Rajasthan-305001 IndiaAjmerRAJASTHAN. Name of principal investigator: Dr Suchitra Narayan. Site 3 : Jawaharlal Nehru Medical College and H…	5	6	1	5	6	1
81CT-76-20-Medpace.pdf .txt.csv	48068	CTRI/2020/12/029838 [Registered on: 16/12/2020] Trial Registered Prospectively	- G. B. Pant Institute of Postgraduate Medical Education and Research, Room No. 133, 1St Floor, Academic Block, Department of Cardiology, Jawahar Lal Nehru Marg, New Delhi-110002, India - Institutional Ethics Committee, Room No-306-A, Maulana Azad Medical College, New Delhi -110002, India - ECR/329/Inst/DL/2013/RR-19 - Name of the investigator: Dr. Vimal Mehta.	Site 1 : Care Institute of Medical Sciences Near. Shukan Mall, Off. Science City Road, Sola -38060AhmadabadGUJARAT. Name of principal investigator: Dr Milan Chinubhai Chag. Site 2 : G .B. Pant Institute of Postgraduate Medical Education & Research, Room No.-133, 1st Floor, Academic Block,Department of Cardiology, Jawahar Lal Nehru Marg,New Delhi-110002, IndiaNew DelhiDELHI. Name of principal inve…	1	5	1	1	5	1
35 CT-133-20-Spectra.pdf .txt.csv	48547	CTRI/2021/05/033546 [Registered on: 11/05/2021] Trial Registered Prospectively	- Apollo Hospitals, No. 21, Greams Lane, Off Greams Road, Chennai 600 006, Tamil Nadu, India. Ethics committee details: Institutional Ethics Committee – Clinical Studies, Apollo Hospitals Enterprise Limited, #21, Greams Lane, Off Greams Road, Thousand Lights, Chennai - 600 006, Tamil Nadu, India. ECR number: ECR/10Inst/TN/2017. Name of investigator: Dr. V. Ramasubramanian. - Apollo Hospitals, 154…	Site 1 : Apollo Hospital International LImited Infectious Disease Department Plot 1A Bhat GIDC Estate Gandhinagar 382428AhmadabadGUJARAT. Name of principal investigator: Dr Manoj Singh. Site 2 : Apollo Hospitals Department of Infectious Disease 21 Greams Lane Off Greams Road ChennaiChennaiTAMIL NADU. Name of principal investigator: Dr V Ramasubramanian. Site 3 : Apollo Hospitals Navi Mumbai Infec…	7	5	5	7	5	5
CT-21-2020.pdf .txt.csv	48578	CTRI/2020/11/028779 [Registered on: 02/11/2020] Trial Registered Prospectively	- Clinical Trial Site 1: All India Institute of Medical Sciences, Patna, Phulwarisharif, Bihar -801507 India; Ethics Committee details: Institutional Ethics Committee, All India Institute of Medical Sciences, Patna, Phulwarisharif, Bihar -801507 India; ECR number: ECR/1387/Inst/BR/2020; Name of Principal Investigator: Dr. Chandramani Singh - Clinical Trial Site 2: Visakha Institute of Medical Sci…	Site 1 : All India Institute of Medical Sciences 1st Floor, Room No. 17, Department of Community & Family Medicine, Aurangabad Road,Phulwari Sharif- 801507PatnaBIHAR. Name of principal investigator: Dr Chandramani Singh. Site 2 : Visakha Institute of Medical Sciences(VIMS) 2nd Floor, Room No. 03, S.No.97/2, Dept of Medicine, Hanumanthuwaka, Chinagadilli Village-530040VisakhapatnamANDHRA PRADESH. …	2	2	2	2	2	2
11AstraZeneca.pdf .txt.csv	48758	CTRI/2021/03/031930 [Registered on: 11/03/2021] Trial Registered Prospectively	- Tata Memorial Hospital, 3rd Floor, Homibhabha Building, Room Number 323, Dr Ernest Borges Road, Parel, Mumbai-4000 Maharashtra, India. Ethics committee details: Institutional Ethics Committee, 3rd Floor, Main Building, Dr Ernest Borges Road, Parel, Mumbai-4000 Maharashtra, India. ECR number: ECR/170/Inst/MH/2013/RR-19. Name of investigator: Dr. Vikas Sureshchand Ostwal. - Artemis Hospital, Sect…	Site 1 : Artemis Hospital Dept. of Medical Oncology Chief of Medical Oncology Sector 51, PIN– 122001 GurgaonHARYANA. Name of principal investigator: Dr Hari Goyal. Site 2 : HCG Manavata Cancer Centre Behind Shivang Auto, Mumbai Naka, PIN -422002NashikMAHARASHTRA. Name of principal investigator: Dr Shruti Kate. Site 3 : Kokilaben Dhirubhai Ambani Hospital and Medical Research Institute Dept. of Me…	6	7	6	6	7	6
85 Ct-90-20-IQVIA-CTNOC.pdf .txt.csv	48797	CTRI/2020/10/028602 [Registered on: 23/10/2020] Trial Registered Prospectively	1. Kasturba Medical College Hospital (a constituent institution of MAHE, Manipal), Attavar, Mangaluru-575001, Karnataka, India, Ethics committee details: Manipal Academy of Higher Education (MAHE) Ethics Committee, ECR/541/Ins/t/KA/2014/RR-20, Name of investigator: Dr. John Thomas Ramapuram. 2. Sahyadri Super Specialty Hospital, 30C, Erandwane, Karve Road, Pune -411004, Maharashtra, India, Ethics…	Site 1 : Chopda Medicare & Research Centre Pvt Ltd Dept of Cardiology, Ground Floor,NA – OPD ,Magnum Heart Institute, 3/5, Patil Lane No, Laxmi Nagar, Near K.B.H Vidyalaya, Canada Corner, Nashik – 422005, MaharashtraNashikMAHARASHTRA. Name of principal investigator: Dr Manojkumar Chopada. Site 2 : JSS Hospital Dept of Geriatric , 1st Floor, 1002, MG Road, Mysuru – 570004, KarnatakaMysoreKARNATAKA…	7	7	7	7	7	7
80CT-79-20-Johnson & Johnson.pdf .txt.csv	48922	CTRI/2020/11/029081 [Registered on: 12/11/2020] Trial Registered Prospectively	- Tata Memorial Hospital, Dr. Ernest Borges Marg, Parel, Mumbai-4000- Ethics committee details: Institutional Ethics Committee Clinical Research Secretariat, 3rd Floor Main Building Tata Memorial Hospital Parel, Mumbai-4000 ECR/170/Inst/MH/2013/RR-19, Name of the investigator: Dr. Vijay Patil - Basavatarakam Indo American cancer Hospital and Research Institute, Road No. 10, Banjara Hills, Hyderab…	Site 1 : Basavatarakam Indo American Centre Hospital and Research Institute Road No 14, Banjara Hills, Hyderabad, Telangana, 500034, IndiaHyderabadTELANGANA. Name of principal investigator: Dr M V T Krishna Mohan. Site 2 : HCG Manavata Cancer Center Behind Shivang Auto,Mumbai Naka, Nasik, Maharashtra, 422002, IndiaNashikMAHARASHTRA. Name of principal investigator: Dr Rajnish Nagarkar. Site 3 : No…	4	6	4	4	6	2
89 CT-83-20-Medpace-CT NOC.pdf .txt.csv	49049	CTRI/2020/12/030162 [Registered on: 31/12/2020] Trial Registered Prospectively	1. Institute of Neurosciences, Near Valentino Business Hub, BRTS Canal Road, Opp. Khatodara BRTS Bus Stand, Surat, Gujarat-395001, Ethics committee details: Unity Hospital Ethics Committee, Unity Hospital, Unity Trauma Center and ICU, N-4 Janki Park Society, Aai Mata Road, Paravat Patiya, Surat - 395010, Gujarat, India, ECR/6/Inst/GJ/2019, Name of investigator: Dr. Anirudha Apte. 2. Shree Siddhiv…	Site 1 : Bangalore Medical College and Research Institute Fort, K.R. Rd, Bengaluru, 560002, IndiaBangaloreKARNATAKA. Name of principal investigator: Dr Parveen Kumar. Site 2 : Christian Medical College Vellore Ida Scudder Road, Vellore,632004VelloreTAMIL NADU. Name of principal investigator: Dr Arun Mathai Mani. Site 3 : Deenanath Mangeshkar Hospital and Research Centre, Erandwane, 411004 ,IndiaP…	9	11	7	9	11	7
88 CT-92-20-Eli Lilly-CTNOC.pdf .txt.csv	49051	CTRI/2020/12/029696 [Registered on: 09/12/2020] Trial Registered Prospectively	- Sancheti Institute for Orthopaedics and Rehabilitation, 16 Shivajinagar, Pune-411005, Ethics committee details: Institutional Ethics Committee, Sancheti Institute for Orthopaedics and Rehabilitation, 16 Shivajinagar, Sancheti Research Center, Pune-411005, ECR/90/Inst/MH/2013/RR-20, Name of investigator: Dr. Ajit Nalawade. - Centre for Rheumatic Disease, 1988, Hermes Elegance, 11, Convent Street…	Site 1 : All India Institute of Medical Sciences Plot No. 2, Sector - 20, MIHAN,Nagpur 441108 ,Maharashtra, IndiaNagpurMAHARASHTRA. Name of principal investigator: Dr Rajashree Khot. Site 2 : Amber Clinic 401-402 and 417 Santorini square, Behind Abhishree complex, Above Sangini Hospital, Jodhpur crossroad, Satellite, Ahmedabad, Gujarat - 380015AhmadabadGUJARAT. Name of principal investigator: Dr …	8	12	8	8	12	8
78AstraZeneca.pdf .txt.csv	49220	CTRI/2020/12/029451 [Registered on: 01/12/2020] Trial Registered Prospectively	1. Shetty’s Hospitals, Plot No. 11& h “F Main, Kaveri Nagar, Bommanahalli, Bangalore - 560068, Karnataka, India. Ethics committee details: Shetty’s Hospital Ethics Committee. ECR number: ECR/918/Inst/KA/2017/RR-20. Name of the investigator: Dr. Satheesh C.T. 2. Kokilaben Dhirubhai Ambani Hospital and Medical Research Institute, 2nd floor, Rao Saheb Achutrao Patwardhan Marg, Four Bunglows, Andheri…	Site 1 : Kokilaben Dhirubhai Ambani Hospital and Medical Research Institute Dept. of Medical Oncology Consultant Medical Oncologist Kokilaben Dhirubhai Ambani Hospital and Medical Research Institute, Rao Saheb, Achutrao Patwardhan Marg, Four Bungalows, Andheri West, Mumbai, PIN 400053 MumbaiMAHARASHTRA. Name of principal investigator: Dr Imran Shaikh. Site 2 : Rajiv Gandhi Cancer Institute and Re…	3	2	2	3	2	1
100 CT-107-20-PPD.pdf .txt.csv	49646	CTRI/2021/01/030594 [Registered on: 19/01/2021] Trial Registered Prospectively	- B J Medical College, Civil Hospital, Asarwa, Ahmedabad-380016, Institutional Ethics Committee, Civil Hospital and B J Medical College, Ahmedabad, ECR/72/Inst/GJ/2013/RR-19, Dr. Bela J Shah. - Department of Dermatology, Venereology & Leprology, Postgraduate Institute of Medical Education & Research, Sector - Chandigarh - 1600 India, Institutional Ethics Committee #6006, 6th Floor, P. N Chuttani …	Site 1 : Ajanta Hospital and IVF Centre Ajanta Research Centre, Ajanta Hospital and IVF Centre, 765, ABC Complex, Kanpur Road, Alambagh, Lucknow-226005 LucknowUTTAR PRADESH. Name of principal investigator: Dr Amit Madan. Site 2 : BJ Medical college and Civil Hospital Department of Dermatology, Venereology and Leprosy B. J. Medical College and Civil Hospital, Asarwa, Ahmedabad-380016 AhmadabadGUJA…	4	4	4	4	4	4
Sr. No. 74 CT-41-21-Novartis.pdf .txt.csv	49651	CTRI/2022/03/041310 [Registered on: 23/03/2022] Trial Registered Prospectively	- Department of Paediatrics, All India Institute of Medical Sciences (AIIMS), Tatibandh, GE Road, RAIPUR-492099, Chhattisgarh. Ethics committee details: Institute Ethics Committee, AIIMS Raipur, Room No. 2103, 2nd Floor, South Wing, Medical College Complex, Gate No. 5, All India Institute of Medical Sciences Tatibandh, GE Road, Raipur-492099, Chhattisgarh. ECR number: ECR/2020/CR/011. Investigato…	Site 1 : All India Institute of Medical Sciences Department of pediatrics,GE ROAD,Tatibandh, Raipur 492099, Chhattisgarh IndiaRaipurCHHATTISGARH. Name of principal investigator: Dr Sunil Natha Jondhale. Site 2 : Community Welfare Society Hospital (CWSH) Northen Avenue Jagda Rourkela, 769042 Orissa IndiaSundargarhORISSA. Name of principal investigator: DrSanjib Mohanty. Site 3 : Nirmal Hospital PV…	3	3	3	3	3	3
24 CT-138-20-Parexel.pdf .txt.csv	51400	CTRI/2021/03/032040 [Registered on: 16/03/2021] Trial Registered Prospectively	- Dept. of Medicine and Haematology, St. John's Medical College and Hospital, Sarjapur Road, Bangalore- 560034, Kamataka, India. Ethics committee details: Institutional Ethics Committee, Ground Floor, St. John's Medical College, Sarjapur Road, Bangalore-560034, Karnataka, India. ECR/238/Inst/KA/2013/RR-19. Name of the investigator: Dr. Ross Cecil Reuben. - Sahyadri Super Speciality Hospital, 30C …	Site 1 : Nil Ratan Sircar Medical College & Hospital Department of Hematology, 4th floor, HOD chamber, 138, Acharya J. C. Bose Road, West Bengal IndiaKolkataWEST BENGAL. Name of principal investigator: Dr Tuphan Kanti Dolai. Site 2 : Nirmal Hospital Pvt Ltd Department of Pediatrics, OPD No.1, First floor, Ring Road, GujaratSuratGUJARAT. Name of principal investigator: Dr Nirmalkumar Ganeshmal Cho…	5	5	5	5	5	5
3CT-04-21-ICMR.pdf .txt.csv	51528	CTRI/2021/12/038622 [Registered on: 14/12/2021] Trial Registered Prospectively	- Clinical trial site 1: PGIMER, Chandigarh - Postgraduate Institute of Medical Education and Research, Chandigarh, India-1600Ethics committee details: Institutional Ethics Committee, Postgraduate Institute of Medical Education and Research, Chandigarh, ECR/25/Inst/Ch/2013/RR-20 Name of the investigator: Dr. Nusrat Shafiq - Clinical trial site 2: AIIMS Jodhpur - All India Institute of Medical Sci…	Site 1 : All India Institute of Medical Science, Jodhpur Basni Industrial Area, MIA 2nd Phase, Basni, Jodhpur, Rajasthan 342005JodhpurRAJASTHAN. Name of principal investigator: Dr Deepak Kumar. Site 2 : Post Graduate Institute of Medical Education and Research, Chandigarh Madhya Marg, Sector 12, Chandigarh, 160012ChandigarhCHANDIGARH. Name of principal investigator: Dr Nusrat Shafiq	2	2	2	2	2	2
87 CT-84-20-AstraZeneca-CT NOC.pdf .txt.csv	51554	CTRI/2021/01/030611 [Registered on: 20/01/2021] Trial Registered Prospectively	1. Mazumdar Shaw Medical Center (A Unit of Narayana Hrudayalaya Limited), No. 258/A, Bommasandra Industrial Area, Hosur Road, Anekal Taluk, Bangalore-560099, India. Ethics committee details: Institutional Ethics Committee, (A Unit of Narayana Hrudayalaya Limited), No. 258/A, Bommasandra Industrial Area, Hosur Road, Anekal Taluk, Bangalore-560099, India. ECR number: ECR/360/Inst/KA/2013/RR-19. Nam…	Site 1 : ACI Cumballa Hill Hospital Dept. of Medical Oncology 93/95, Kemp’s Corner, August Kranti Maidan, Grant Road, Mumbai PIN 400036MumbaiMAHARASHTRA. Name of principal investigator: Dr Suhas Vilasrao Aagre. Site 2 : All India Institute of Medical Sciences, Delhi Dept. of Medical Oncology, Ansari Nagar, PIN - 110029 New DelhiDELHI. Name of principal investigator: Dr Sachin Khurana. Site 3 : Fo…	8	12	7	8	12	7
Sr. No. 75 CT-34-21-Novartis.pdf .txt.csv	51695	CTRI/2021/10/037098 [Registered on: 05/10/2021] Trial Registered Prospectively	- M S Ramaiah Medical College and Hospitals, MSRIT Post, Bangalore-56005, Karnataka, India. Ethics committee details: Ethics Commttee, M S Ramaiah Medical College and Hospitals, M S Ramaiah Nagar, MSRIT Post, Bangalore-560054 Karnataka, India. Investigator name: Dr. Naresh Shetty. - Rhythm Heart Institute- A Unit of Synergy Lifecare Pvt. Ltd., Near Siddharth Bunglows, Sama-Savli Road, Vadodara-39…	Site 1 : CIMETs Inamdar Multispeciality Hospital S. No. 15, Fatima Nagar, Behind KPCT Mall, Wanwadi, Pune-411040PuneMAHARASHTRA. Name of principal investigator: Dr Qaedjohar O Dhariwala. Site 2 : GSVM Medical College Department of Orthopedic, GSVM Medical College, Swaroop Nagar, Kanpur, Uttar Pradesh- 208002, IndiaKanpur NagarUTTAR PRADESH. Name of principal investigator: Dr Rajendra Kumar Verma.…	5	8	5	5	8	3
Topiroxostat.pdf .txt.csv	51917	CTRI/2021/02/031284 [Registered on: 15/02/2021] Trial Registered Prospectively	1. Name of Principal Investigator & Trial sites: Dr. Vinay Kumar, Department of Surgery, GSVM Medical College, Kanpur-208002, Uttar Pradesh, India. Ethics Committee Name/Registration Number: Ethics Committee, G.SV.M Medical College, Principal Office, G.S.V.M Medical College, Swaroop Nagar, Kanpur-208002, Uttar Pradesh, India. ECR/680/lnst/UP/2014/RR-17. 2. Name of Principal Investigator & Trial s…	Site 1 : Anu Hospitals Department of Clinical Research, Kovelamudivari Street, Suryaraopet, Vijayawada-520002.KrishnaANDHRA PRADESH. Name of principal investigator: Dr M Sateesh. Site 2 : B.J. Medical College & Civil Hospital Department of Urology, Asarwa, Ahmedabad-380016.AhmadabadGUJARAT. Name of principal investigator: Dr Kalpesh Kantilal Kapadia. Site 3 : Gandhi Medical College & Hospital In …	9	16	9	9	16	8
99 CT-106-20 J&J.pdf .txt.csv	52309	CTRI/2021/03/032147 [Registered on: 19/03/2021] Trial Registered Prospectively	- Apollo Hospitals, No.21, Greams Lane, Off Greams Road, Chennai-600006, Tamil Nadu, India. Ethics committee details: Institutional Ethics Committee-Clinical Studies, Apollo Hospitals Enterprise Limited, #21, Greams Lane, Off Greams Road, Thousand Lights, Chennai-600006 Tamil Nadu, India. ECR/37/Inst/TN/2013/RR-19. Investigator: Dr. Abraham Oomman. - Sanjivani Super Speciality Hospital Pvt Ltd 1,…	Site 1 : Apollo hospitals Department of Cardiology, Room No.9, Ground Floor, 21- Greams lane, Off Greams Road, Chennai – 600006 ChennaiTAMIL NADU. Name of principal investigator: Dr Abraham Oomman. Site 2 : Sanjivani superspeciality hospital pvt ltd. Research Department, Ground floor, 1, Uday Park society, Near sunrise park, Vastrapur-380015AhmadabadGUJARAT. Name of principal investigator: Dr Kam…	2	2	2	2	2	2
22 Ct-12-21-Sanofi.pdf .txt.csv	53089	CTRI/2021/08/035384 [Registered on: 04/08/2021] Trial Registered Prospectively	- Department of Rheumatology and Clinical Immunology, Medanta The Medicity, Sector-38, Gurugram, Haryana-001. India, Ethics committee details: Medanta Institutional Ethics Committee, ECR/282/Inst/HR/2013/RR-20, Name of investigator: Dr. Rajiva Gupta - Department of Dermatology, Sir Ganga Ram Hospital, SGRH Marg, Rajinder Nagar, New Delhi-110060, India, Ethics committee details: Sir Ganga Ram Hosp…	Site 1 : Assured Care Plus Hospital 4th & 5th Floor, Star Plus Complex, Lam Road, Near Muktidham Temple, Opposite NMC Divisional office, Nashik Road, Nashik 422101, Maharashtra, IndiaNashik MAHARASHTRA. Name of principal investigator: Dr Suneel Chandrakant Vartak. Site 2 : Bowring & Lady Curzon Medical College & Research Institute 1, Lady Curzon Road, Shivaji Nagar, Bengaluru, Karnataka 560001, I…	6	7	5	6	7	5
1Astraeneca.pdf .txt.csv	53176	CTRI/2021/03/032175 [Registered on: 19/03/2021] Trial Registered Prospectively	- Name and address of clinical trial site: Apollo Speciality Hospital, No. 320, Padma Complex, Anna Salai, Chennai - 600035. - Ethics committee details: Institutional Ethics Committee-Clinical Studies, Apollo Hospital, #21, Greams lane, off Greams Road, Thousand lights, Chennai - 600006, Tamilnadu, India. ECR/37lInst/TN/2013/RR- I 6. - Name of the investigator: Dr. Madras Ananthanarayanan Raja.	Site 1 : Apollo Speciality Hospital Dept. of Medical Oncology No: 320, Padma Complex, Anna Salai, Nandanam PIN- 600035ChennaiTAMIL NADU. Name of principal investigator: Dr Madras Ananthanarayanan Raja	1	1	1	1	1	1
23 Ct-104-20-AstraZeneca.pdf .txt.csv	54566	CTRI/2021/04/032961 [Registered on: 20/04/2021] Trial Registered Prospectively	- Tata Medical Centre, 14-MAR (EW), New Town, Rajarhat, Kolkata - 700160, West Bengal, India Ethics committee details: Institutional Review Board, Tata Medical Center, 14-MAR (EW), New Town, Rajarhat, Kolkata - 700160, West Bengal, India ECR number: ECR/269/Inst/WB/2013/RR-19. Name of investigator: Dr. Bivas Biswas - Department of Medical Oncology, H Block extension VMMC & Safdarjung Hospital, Ne…	Site 1 : All India Institute of Medical Sciences, AIIMS Associate Professor - Department of Medical Oncology Dr. B. R. Ambedkar Institute of Rotary Cancer Hospital, Department of Medical Oncology, Ansari Nagar, PIN-110029 New DelhiDELHI. Name of principal investigator: Dr Prabhat Singh Malik. Site 2 : Kasturba Medical College and Hospital Medical Oncologist Department of Medical Oncology, Madhav …	6	7	3	6	7	3
34 CT-3-21-AstraZeneca.pdf .txt.csv	55321	CTRI/2021/06/034430 [Registered on: 28/06/2021] Trial Registered Prospectively	1. Institute of Respiratory Diseases, SMS Medial College & Hospital, B-2, Subhash Nagar shopping center, Shastri nagar, Jaipur, 302016, Rajasthan, India. Ethics committee details: Ethics Committee of SMS Medical College & Attached Hospital, First Floor. Dhanvantri OPD Block, SMS Hospital, J.L.N. Marg, Jaipur. 302004. Rajasthan, India. Name of investigator: Dr. Narendra Khippal. 2. Department of P…	Site 1 : Criticare Hospital and Research Institute 4th Floor, Dhanashree Complex, Near Hotel Hardeo, Sitabuldi, PIN- 440012NagpurMAHARASHTRA. Name of principal investigator: Dr Vivek Gupta. Site 2 : Hindustan Hospital Consultant Pulmonologist 522 3, 523 3 Nava India Road, Udaiyampalayam, Coimbatore - 641028 CoimbatoreTAMIL NADU. Name of principal investigator: Dr Srikanth Krishnamurthy. Site 3 : …	5	6	5	5	6	5
38CT33-21-AstraZeneca.pdf .txt.csv	55353	CTRI/2021/05/033819 [Registered on: 27/05/2021] Trial Registered Prospectively	- Apex Wellness Hospital, Survey No. 799, Plot no. 187, Behind Prakash Petrol Pump, Govind Nagar, Nashik -422009; Ethics committee details: APEX WELLNESS ETHICS COMMITTEE (AWEC), C/O- Apex Wellness Hospital, Survey No. 799, Plot no, 187, Behind Prakash Petrol Pump, Govind Nagar, Nashik - 422009; ECR/1500/Inst/MH/2021; Name of investigator: Dr. Shailesh A. Bondarde. - KLES Dr Prabhakar Kore hospit…	Site 1 : Aakash Healthcare Super Speciality Hospital Dept. of Medical Oncology Hospital Plot, Road No. 201, Sector 3, Dwarka, PIN – 110075New DelhiDELHI. Name of principal investigator: Dr Parveen Jain. Site 2 : Apex Wellness Hospital Dept. of Medical College Apex Wellness Hospital, behind Prakash Petrol pump, Govindnagar, PIN 422009NashikMAHARASHTRA. Name of principal investigator: Dr Shailesh B…	9	12	8	9	12	5
32 Ct-13-21-IQVIA.pdf .txt.csv	55489	CTRI/2021/04/033241 [Registered on: 29/04/2021] Trial Registered Prospectively	- All India Institute of Medical Sciences Ansari Nagar New Delhi-I I 0029 - Ethics committee details: AIIMS Ethics Committee, Room No. First Floor, Old OT Block, All India Institute of Medical Sciences Ansari Nagar New Delhi -I I 0029 - ECR/538/Inst/DL/2014/RR-20 - Name of the investigator: Dr. Viveka P. Jyotsna.	Site 1 : All India Institute of Medical Sciences Room No.: 58, DEXA room, Ground Floor, Raj Kumari Amrit KAur OPD Block, Ansari Nagar, New Delhi – 110029New DelhiDELHI. Name of principal investigator: Dr Viveka P Jyotsna	1	1	1	1	1	1
18_Premium Serum.pdf .txt.csv	55706	CTRI/2021/06/034359 [Registered on: 24/06/2021] Trial Registered Prospectively	- Site 1: Prakash Institute of Medical Sciences & Research, Urun-Islampur, Islampur-Sangli Road, Islampur, Tal-Walwa, Dist. Sangali-415409, Maharashtra. Ethics Committee details: Prakash Medical College Institutional Ethics Committee, Prakash Institute of Medical Sciences & Research, Urun-Islampur, Islampur-Sangli Road, Dist. Sangali-415409 Maharashtra, India. ECR No.: ECR/1052/Inst/MH/2018. Prin…	Site 1 : Prakash Institute of Medical Sciences & Research, Urun Islampur Clinical Research Department, Room No. 4, Islampur-Sangali, Islampur, Tal- Walwa, Dist- SangaliSangliMAHARASHTRA. Name of principal investigator: Dr Vijaykumar Patil. Site 2 : Rajarshee Chhatrapati Shahu Maharaj Govt. Medical College & CPR Hospital, Kolhapur Department of Medicine, CPR Hospital, Dasara Chowk, Bhausingji road…	2	2	2	2	2	2
Sr. No. 46 CT-07-21-AstraZeneca.pdf .txt.csv	55716	CTRI/2021/06/034372 [Registered on: 24/06/2021] Trial Registered Prospectively	1. Artemis Hospital, Sector 51, Gurugram, Pin Code-001, Haryana, India; Ethics committee details: Artemis Health Sciences Institutional Ethics Committee, Artemis Hospital, Sector 51, Gurugram, Pin Code-001, Haryana, India; ECR/53/Inst/HR/2013/RR-19; Name of investigator: Dr. Priya Tiwari. 2. Rajiv Gandhi Cancer Institute and Research Centre, Sector-5, Rohini, New Delhi-110085; Ethics committee de…	Site 1 : All India Institute of Medical Sciences (AIIMS) Room No.216, Dr. B.R.A.-IRCH, Ansari Nagar, New Delhi-110029New DelhiDELHI. Name of principal investigator: Dr Atul Batra. Site 2 : Apex Wellness Hospital Dept. of Medical Oncology Survey no.799, Plot No. 187, Behind Prakash Petrol Pump, Govind Nagar, PIN 422009 NagpurMAHARASHTRA. Name of principal investigator: Dr Shailesh Bondarde. Site 3…	10	15	8	10	15	7
Sr. No. 49 CT-21-21-CBCC.pdf .txt.csv	56659	CTRI/2021/07/034694 [Registered on: 08/07/2021] Trial Registered Prospectively	- Clinical trial site 1: Mumbai Oncocare Centre, 2nd Floor, Majithia Apartments, God’s Gift Premises Co. Op. Society Ltd., Above Irla Nursing Home, S V Road, Vile Parle (W), Mumbai - 400 056, Maharashtra, India. Ethics committee details: Mumbai Oncocare Centre Institutional Ethics Committee, ECR/7/Inst/MH/2019. Name of investigator: Dr. Kshitij Joshi. - Clinical trial site 2: Aadhar Health Instit…	Site 1 : Aadhar Health Institute Near South Bypass Crossing, NH10-Tosham Rd Connection Rd, Hisar, Haryana - 125005, indiaHisarHARYANA. Name of principal investigator: Dr Lovenish Goyal. Site 2 : Mumbai Oncocare Centre 2nd Floor, Majithia Apartments, Gods Gift Premises Co. Op. Society Ltd., Above Irla Nursing Home, S V Road, Vile Parle (W), Mumbai 400 056 Maharashtra, India MumbaiMAHARASHTRA. Name…	2	2	2	2	2	2
10.JSS.pdf .txt.csv	57079	CTRI/2021/06/034334 [Registered on: 22/06/2021] Trial Registered Prospectively	- St. George Hospital, PD Mello Road, CST-Mumbai 400001 Maharashtra, with Ethics Committee details of Institutional Ethics Committee, GGMC, MUMBAI Grant Govt Medical College JJ Road, JJ Hospital compound Mumbai Central Mumbai Mumbai City Maharashtra - 400008 India, and the name of the Principal Investigator being Dr. Darnule Rahul Ashok. - Medanta Medicity, Sector 38, Gurugram Haryana-001, with E…	Site 1 : Excel Hospital 1-5-56/29, Plot No. 29, Old Alwal, Near IG Statue, Beside Bharat Petroleum, Secunderabad, Telangana-500010, India.HyderabadTELANGANA. Name of principal investigator: Dr Govardhan Rao MV. Site 2 : Kkasturi Medicare Pvt. Ltd. Harshniketan Gaondevi Road, Behind Navrang Hotel, Bhayandar West, Dist-Thane, 401101, Maharashtra, IndiaThaneMAHARASHTRA. Name of principal investigato…	5	11	1	5	11	1
Sr. No. 91 CT-94-21-ICMR.pdf .txt.csv	57104	CTRI/2021/12/038710 [Registered on: 17/12/2021] Trial Registered Prospectively	1.Department of Medicine, PGIMER, Chandigarh 160012 Institutional Ethics Committee, Postgraduate Institute of Medical Education and Research, Chandigarh ECR/25/Inst/Ch/2013/RR-20 Dr. Ashish Bhalla 2.All India Institute of Medical Sciences (AIIMS), Jodhpur 342005 Institutional Ethics Committee, All India Institute of Medical Sciences (AIIMS), Jodhpur ECR/1465/AIIMS Jodhpur/Inst./RJ/2016 Dr. Deepak…	Site 1 : All India Institute of Medical Science, Jodhpur Department of Internal Medicine, Basni Industrial Area, MIA 2nd Phase, Basni, Jodhpur, Rajasthan 342005 Jodhpur RAJASTHAN JodhpurRAJASTHAN. Name of principal investigator: Dr Deepak Kumar. Site 2 : Post Graduate Institute of Medical Education and Research, Chandigarh Department of Internal Medicine, Madhya Marg, Sector 12, Chandigarh, 16001…	2	2	2	2	2	2
Sr. No. 135 Ct-121-21-Novartis.pdf .txt.csv	58570	CTRI/2022/02/040428 [Registered on: 18/02/2022] Trial Registered Prospectively	1.Chopda Medicare & Research Centre Pvt. Ltd., Magnum Heart Institute, 3/5, Patil Lane No. 1, Laxmi Nagar, Near K.B. H. Vidyalaya, Canada Corner, Nashik-422005, Maharashtra, India Chopda Medicare & Research Centre Pvt. Ltd., Magnum Heart Institute, Clinical Research Department, Flat No. 10, Laxmanrekha Apartment, Behind Magnum Heart Institute, Patil Lane No. 1, Canada Corner, Nashik 422005, Mahar…	Site 1 : Apollo Gleneagles Hospitals Kolkata,58-Canal Circular Road, Kolkata-700 054 West Bengal, India KolkataWEST BENGAL. Name of principal investigator: DrSrabani Zoha. Site 2 : Chopda Medicare and Research Centre Pvt. Ltd. Magnum Heart Institute, 3/5 Patil Lane No. 1, Laxmi Nagar, Near KBH Vidyalaya, Canada Corner, Nashik- 422005NashikMAHARASHTRA. Name of principal investigator: Dr Teja Kulka…	10	10	10	10	10	9
Sr. No. 123 Ct-110-21-Novartis.pdf .txt.csv	58577	CTRI/2021/12/038740 [Registered on: 20/12/2021] Trial Registered Prospectively	"1. Rajiv Gandhi Cancer Institute and Research Centre, Sector 5, Rohini, Delhi-110085, India. Ethics committee details: Institutional Review Board, Rajiv Gandhi Cancer Institute and Research Centre, Sector 5, Rohini, Delhi-110085, India. ECR number: ECR/10/Inst/DC/2013/RR-19. Name of the investigator: Dr. Dinesh Bhurani. ", "2. Tata Medical Center, 14/MAR (EW), Newtown, Rajarhat, Kolkata-700160. …	Site 1 : Rajiv Gandhi Cancer Institute and Research Centre DEPARTMENT OF HEMATO ONCOLOGY and BMT, Sector-5, Rohini, Delhi-110085, IndiaNorth WestDELHI. Name of principal investigator: Dr Narendra Agarwal. Site 2 : Tata Medical Centre Division of Hematology/Oncology and Haematopoietic Cell Transplantation, 14 MAR (EW) Newtown, Rajarhat Kol 700160KolkataWEST BENGAL. Name of principal investigator: …	3	3	3	3	3	1
2DG-Dr. Reddy.pdf .txt.csv	58968	CTRI/2021/08/035910 [Registered on: 25/08/2021] Trial Registered Prospectively	1. Dr. Boyilla Nagaraju, Aster Prime Hospitals, Opp. Passport sevakendra, Ameerpet, Hyderabad-500038, Telangana State, Ethics committee, Prime Hospitals, Opp. Passport sevakendra, Ameerpet, Hyderabad-500038, Telangana State, ECR/381/Inst/Ap/2013/RR-21 2. Dr. Sanjiv Maheshwari, Jawahar Lal Nehru Medical College, Kala Bagh, Ajmer-305001, Rajasthan, Institutional Ethics Committee, Jawahar Lal Nehru …	Site 1 : BGS Global Institute of Medical Sciences Department of General Medicine, BGS Global Institute of Medical Sciences, No. 67, BGS Health and Education City, Uttarahalli Road, Kengeri, Bengaluru – 560060, Karnataka, India BangaloreKARNATAKA. Name of principal investigator: Dr Balachandra G. Site 2 : JLN Medical College Department of Medicine, JLN Medical College, Kala Bagh, Ajmer-305001, Raj…	10	5	2	10	5	2
sr. No. 104 CT-112-21-Syngene.pdf .txt.csv	62671	CTRI/2021/12/038577 [Registered on: 10/12/2021] Trial Registered Prospectively	1.Father Muller Medical College Hospital Father Muller Road, Kankanady Magalore-575002 Father Muller Institutional Ethics Committee, Father Muller Research Centre. Father Muller Road Kankanady, Mangalore- 575002 ECR/540/Inst/KA/2014/RR-20 Dr. Archana Bhat 2.St. George's Hospital, P'D Mello Road, Fort Road, CST Terminal, Mumbai 400001 Institutional Ethics Committee, GGMC, Mumbai, Grant Government …	Site 1 : Father Muller Medical College Hospital Staff Room , Department of General Medicine, 6th Floor, General Ward Building, Father Muller Medical College Hospital Kankanady, Mangalore-575002Dakshina KannadaKARNATAKA. Name of principal investigator: Dr Archana Bhat. Site 2 : JSS Hospital Mysore CDSA-Center For Clinical Research Excellence, Room Number 2222, Master Health Check Area, 2nd Floor, …	3	6	3	3	6	3
74.pdf .txt.csv	63950	CTRI/2022/06/043430 [Registered on: 22/06/2022] Trial Registered Prospectively	- Site 1: Mahatma Gandhi Cancer Hospital & research Institute, 1/7 MVP colony, Visakhapatnam-530017, Andhra Pradesh, India. Ethics Committee Details: Institutional Review Board Mahatma Gandhi Cancer Hospital Research Institute, 1/7 MVP Colony, Visakhapatnam, Andhra Pradesh - 530017, India. ECR number: ECR/529/Inst/AP/2014/RR-20. Name of Principal Investigator: Dr. Rakesh Reddy Boya. Site 2: Depar…	Site 1 : Deenanath Mangeshkar Hospital Department of Clinical Research, Room No. NA, Deenanath Mangeshkar Hospital and Research centre, Erandwane, Pune-411004.PuneMAHARASHTRA. Name of principal investigator: Dr Shailesh Kanvinde. Site 2 : Department of Pediatrics, Sir Ganga Ram Hospital Department of Clinical Research, Room No. NA, Sir Ganga Ram Hospital, Sir Ganga Ram Hospital marg, Rajinder nag…	4	14	4	4	14	3
sr. No. 106 CT-77-21-CBCC.pdf .txt.csv	63962	CTRI/2021/12/038850 [Registered on: 22/12/2021] Trial Registered Prospectively	1. BGS Global Institute of Medical Sciences & Hospital, #67, BGS Health & Education City, Uttarahalli Road, Kengeri, Bangalore South-560060, Karnataka, India (ECR/1307/Inst/KA/2019, Dr. M. E. Mohan) 2. Rajarajeswari Medical College and Hospital, 202 Mysore Road, Kengeri Satellite Town, Kambipura, Bangalore-560074, Karnataka, India (IEC Rajarajeswari Medical College and Hospital, ECR/56/Inst/KA/20…	Site 1 : BGS Global Institute of Medical Sciences and Hospital #67, BGS Health & Education City, 2nd floor, medical college building, Uttarahalli Road Kengeri, Bangalore South – 560060, Karnataka, IndiaBangaloreKARNATAKA. Name of principal investigator: Dr ME Mohan. Site 2 : Rajarajeswari Medical College and Hospital Ground floor, OPD Building, 202, Mysore Road, Kengeri Satellite Town, Kambipura,…	2	2	2	2	2	2
Sr. No. 131 Ct-103-21-AstraZenevca.pdf .txt.csv	64665	CTRI/2022/02/040116 [Registered on: 08/02/2022] Trial Registered Prospectively	1.Healthcare Global Enterprises Ltd, HCG Tower # 8, P. Kalinga Rao Road, Sampangi Ram Nagar Bangalore 560027 HCG‐Central Ethics Committee, HCG Towers,#8, P. Kalinga Rao Road, Sampangi Ram Nagar, Bangalore 560027 ECR/386/Inst/KA/2013/RR‐19 Dr. Satheesh C T 2.Tata Memorial Centre, Department of Medical Oncology, Dr. Ernest Borges Marg, Parel, Mumbai-400012 Institutional Ethics Committee, 3rd Floor …	Site 1 : Asian Institute of Gastroenterology Hospitals Department of Medical Oncology, Plot No. 2/3/4/5 Survery 1. Mindspace Road, Gachibowli PIN 500032, India HyderabadTELANGANA. Name of principal investigator: Dr Vamshi Krishna Muddu. Site 2 : HCG Manavata Cancer Centre Department of Medical Oncology, Behind Shivang Auto, Mumbai Naka, PIN 422002, India MumbaiMAHARASHTRA. Name of principal inves…	6	6	6	6	6	6
Sr. No. 21 CT-150-21-Pfizer-CTNOC.pdf .txt.csv	64727	CTRI/2022/04/041982 [Registered on: 20/04/2022] Trial Registered Prospectively	1. LMMF’s Deenanath Mangeshkar Hospital & Research Centre, Erandwane, Pune-411004 Institutional Ethics Committee LMMF’s Deenanath Mangeshkar Hospital & Research Centre, Erandwane, Pune-411004 ECR/15/Inst/Maha/2013/RR-19 Dr. Sameer Ramesh Melinkeri 2. Artemis Hospital, Sector 51, Gurugram, Haryana, India-122001 Artemis Health Sciences Institutional Ethics Committee, Artemis Hospital, Sector 51, Gu…	Site 1 : Artemis Hospital Sector 51, Gurugram, Haryana 122001GurgaonHARYANA. Name of principal investigator: Dr Pawan Kumar Singh. Site 2 : Christian Medical College IDA Scudder Road, Vellore, Tamil Nadu - 632004VelloreTAMIL NADU. Name of principal investigator: Dr Vikram Mathews. Site 3 : LMMFs Deenanath Mangeshkar Hospital and Research Centre Gulawani Maharaj Road, Erandwane, Pandurang Colony, …	8	8	8	8	8	8
Sr. No. 13 CT-39-22-Novartis.pdf .txt.csv	64765	CTRI/2023/03/050253 [Registered on: 02/03/2023] Trial Registered Prospectively	"- Somani Hospital, 277-278, Shri Gopal Nagar, 80 Feet Road, Gopalpura, Bypass, Jaipur-302019, Rajasthan. Ethics committee details: Somani Hospital Ethics Committee, ECR/1531/Inst/RJ/2021. Name of investigator: Dr. Naresh Somani.", "- Tata Medical Centre, 14, MAR (E-W) Newtown, Rajarhat, Kolkata-700160, West Bengal, India. Ethics committee details: Institutional Review Board, Tata Medical Centre,…	Site 1 : Basavatarakam Indo American Cancer Hospital & Research Institute, Department of Oncology, Road No 10, Banjara hills, Hyderabad 500034, Telangana State, IndiaHyderabadTELANGANA. Name of principal investigator: DrSenthilJRajappa. Site 2 : Fortis Hospital Ltd 154/9, Bannerghatta Road, Opp to IIM-B, Bangalore-560076BangaloreKARNATAKA. Name of principal investigator: Dr Niti Raizada. Site 3 :…	7	8	7	7	8	7
Sr. No. 2 CT-131-21-Parexel.pdf .txt.csv	65897	CTRI/2022/05/042403 [Registered on: 06/05/2022] Trial Registered Prospectively	"1. Dayanand Medical College and Hospital, Department of Gastroenterology, Tagore Nagar, Civil Lines, Ludhiana, Punjab-141001. Ethics committee details: Drug Trial Ethics Committee, Dayanand Medical College and Hospital, Tagore Nagar, Civil Lines, Ludhiana, Punjab-141001. ECR/101/Inst/PB/2013/RR-19. Name of the investigator: Dr. Ajit Sood. ", "2. Global Hospitals-Super Speciality & Transplant Cen…	Site 1 : Dayanand Medical College and Hospital Department of Gastroenterology, Tagore Nagar, Civil Lines, Ludhiana -141001 LudhianaPUNJAB. Name of principal investigator: Dr Ajit Sood. Site 2 : Global Hospitals Super Specialty and Transplant Centre Department of hepatology, 35, Dr. E. Borges Road, Hospital Avenue, Opp. Dr Shirodkar High School, Parel Mumbai -400012 MumbaiMAHARASHTRA. Name of prin…	2	2	2	2	2	1
Sr. No. 22 Ct-155-21-Parexel.pdf .txt.csv	66253	CTRI/2022/02/040586 [Registered on: 24/02/2022] Trial Registered Prospectively	"1. Victoria Hospital, Bangalore Medical College and Research Institute, K. R. Road, Fort, Bangalore-560002, India, Ethics Committee of Bangalore Medical College and Research Institute, K. R. Road, Fort, Bangalore-560002, Karnataka, India, ECR/302/Inst/KA/2013/RR-20, Dr. K. R. Raveendra ", "2. Department of Respiratory Medicine, GSVM Medical College, Swaroop Nagar, Kanpur-208002, Uttar Pradesh, I…	Site 1 : Aster Prime Hospitals Floor No 2, Department of Pulmonology Plot No: 2&4, Opp. Passport Seva Kendra, Mithrivanam, Ameeerpet, 500036HyderabadTELANGANA. Name of principal investigator: Dr Nagaraju B. Site 2 : Chopda Medicare & Research Centre Pvt. Ltd Department of Pulmonology, OPD No 2, Ground Floor, Magnum Heart Institute 3/5, Patil Lane No. 1, Laxmi Nagar, Near K.B.H. Vidyalaya, Canada …	10	13	8	10	13	8
75.pdf .txt.csv	67636	CTRI/2023/05/052618 [Registered on: 15/05/2023] Trial Registered Prospectively	1 Lifepoint Multispecialty hospital, 145/1, Mumbai Bangalore highway, Near Hotel Sayaji, Wakad, Pune- 411057, Maharashtra LPR Ethics Committee, Lifepoint Multispecialty hospital, 145/1, Mumbai Bangalore highway, Near Hotel Sayaji, Wakad, Pune-411057, Maharashtra EC Reg. No.: ECR/751/Inst/MH/2015/RR-18 Dr. Hrishikesh Patkar 2 Institute Of Medical Sciences, Banaras Hindu University Varanasi-221005 …	Site 1 : HBT Trauma Care Hospital HBT trauma care hospital , Ajgaokar plot , Western express highway Jogeshari , East Mumbai 400060 MumbaiMAHARASHTRA. Name of principal investigator: Dr Amit Joshi. Site 2 : Imperial Hospital & Research Centre Imperial Hospital Research Center A-56 Shastri Nagar Near Kawatia Circle Jaipur -302016, Rajasthan India JaipurRAJASTHAN. Name of principal investigator: Dr…	7	6	1	7	6	1
2Dienogest 2mg Tablet -Sun.pdf .txt.csv	67751	CTRI/2022/04/041959 [Registered on: 20/04/2022] Trial Registered Prospectively	- Dr. Viral T Luhar, Hi-tech Multispeciality Hospital, Sector 3-D, Plot No. 1180, Gh Road, Near Gh- 11/2 Bus Stand, Gandhinagar, Gujarat-382003, India. Ethics Committee: Hi-Tech Ethics Committee (HEC). ECR/1057/Inst/GJ/2018. - Dr. Shital Natwarlal Kapadia, Department of Gynecology, B.J. Medical college & Civil hospital, Asarwa, Ahmedabad -380016, Gujarat, India. Ethics Committee: Institutional Et…	Site 1 : Apollo Institute of Medical Sciences and Research Department of OBGYN, Room No. 2, Apollo Institute of Medical Sciences and Research, Apollo Hospitals, Jubillee Hills, Hyderabad 500096, Telangana, IndiaHyderabadTELANGANA. Name of principal investigator: Dr Krishna Kumari Meka. Site 2 : B J Govt Medical College and Sassoon General Hospitals 3rd Floor, Department of Obst. and Gynaec, B J G…	11	16	11	11	16	11
76.pdf .txt.csv	68549	CTRI/2023/05/052831 [Registered on: 18/05/2023] Trial Registered Prospectively	"- Medical College and hospital, MCH building, 4th Floor, 88 College street, Kolkata-700073, West Bengal. Ethics Committee Details: Institutional Ethics committee for Human Research, Medical College and hospital, 88 College street, Kolkata -700073. ECR number: ECR/287Inst/WB/2013/RR-19. Principal Investigator: Dr. Kaushik Basu.", "- Sancheti Institute for orthopaedics and Rehabilitation, 16, Shiv…	Site 1 : Ishwar Institute of Health Care Ishwar Heights , 1st Floor , Plot no 7 , Gut no 6/1, beside Punjabi Bhavan , Padegaon , Aurangabad - 431002, Maharashtra , India AurangabadMAHARASHTRA. Name of principal investigator: Dr Pravin Markade. Site 2 : Lifepoint Hospital 145/1 , Mumbai Bangalore Highway , Near Hotel Sayaji , Wakad , Pune -411057 Maharashtra , India PuneMAHARASHTRA. Name of princi…	9	5	0	9	5	0
Sr. No. 2 CT-54-22-novartis-CTNOC.pdf .txt.csv	70045	CTRI/2023/02/049813 [Registered on: 17/02/2023] Trial Registered Prospectively	"1. Bangalore Medical College and Research Institute, Victoria Hospital, K.R. Road, Fort, Bangalore, Karnataka-560002. Ethics committee details: Ethics Committee of Bangalore Medical College and Research Institute, Fort, K.R. Road, Bangalore-560002, India. ECR/302/Inst/KA/2013/RR-20. Name of investigator: Dr. Diwakar T. N.", "2. Sanjay Gandhi Postgraduate Institute of Medical Sciences (SGPGIMS), …	Site 1 : AIMS Delhi Department of Rheumatoloogy, AIIMS, Ansari Nagar, New Delhi 110029EastDELHI. Name of principal investigator: DR Uma Kumar. Site 2 : Avron Hospitals Pvt. Ltd. 4. Shanti Niketan Park, Nr. Sardar Patel Statue, Naranpura, Ahmedabad-3 80013." AhmadabadGUJARAT. Name of principal investigator: DrSapan Pandya. Site 3 : Bangalore Medical College and Research Institute, Victoria Hospita…	3	7	3	3	7	3
Sr. No. 8 CT-87-22-PSI CRO.pdf .txt.csv	70455	CTRI/2023/03/050181 [Registered on: 01/03/2023] Trial Registered Prospectively	- Shree Giriraj Multispecialty Hospital, 27-Navjyot Park Corner, 150 Feet Ring Road, Rajkot, Gujarat-360005, India. Ethics committee details: Shree Giriraj Hospital Research Ethics Committee, Shree Giriraj Multispecialty Hospital, 27-Navjyot Park Corner, Amin Marg Cross Road, Rajkot, Gujarat-360005, India. ECR/74/Inst/GJ/2013/RR-19. Name of the investigator: Dr. Chetan Mehta. - Department of Gast…	Site 1 : King Georges Medical University Department of Surgical Gastroenterology, Shatabdi phase 1 , Chowk, Lucknow Lucknow Uttar PradeshLucknowUTTAR PRADESH. Name of principal investigator: Dr Abhijit Chandra. Site 2 : S.R.Kalla Memorial Gastro General Hospital 78-79 Dhuleshwar Garden Behind HSBC Bank Sardar Patel Marg C-Scheme Jaipur Jaipur RajasthanJaipurRAJASTHAN. Name of principal investigat…	5	6	5	5	6	5
Favipiravir Tablet Mylan II.pdf .txt.csv	71511	CTRI/2022/07/043994 [Registered on: 13/07/2022] Trial Registered Prospectively	1 | Dr. Khobragade Akash Ashok Kumar, St. Georges Hospital, Grant Government Medical College and Sir JJ Group of Hospitals, P D Mello Road, CST Mumbai, Maharashtra – 400001. | Grant Government Medical College and Sir JJ Group of Hospitals. ECR/382/Inst/MH/2013/RR-19 2 | Dr. Aparna Kodre, Noble Hospitals Pvt. Ltd., 153, Magarpatta city Road, Hadapsar, Pune Maharashtra – 411013. | Noble Hospital In…	Site 1 : Ashirwad Hospital and Research Centre 3rd floor, Department of general medicine, Maratha Section, Near Jijamata Udyan, Ulhasnagar, Thane - 421004, Maharashtra, IndiaThaneMAHARASHTRA. Name of principal investigator: Dr Shrikant Deshpande. Site 2 : Atharva Multispeciality Hospital & Research Centre Room No. H-4/comm-2, Construction Div- 21, Basement, UP Avas Vikas Parishad, Sector- E, Luck…	4	14	1	4	14	1
Sr. No. 11 Ct-154-21-Cipla.pdf .txt.csv	72170	CTRI/2022/08/044640 [Registered on: 04/08/2022] Trial Registered Prospectively	- Orchid Specialty Hospital, Basement, L-Squire, Porwal Road, Sr. No. 282/3/3, Off, Dhanori Jakat Naka, Lohgaon, Pune-411047, Maharashtra, India. Ethics committee details: Orchid Specialty Hospital Ethics Committee, Orchid Specialty Hospital, L-Squire, Porwal Road, Sr. No. 282/3/3, Lohgaon, Pune-411047, Maharashtra, India. ECR/1089/Inst/MH/2018/RR-21. Name of the investigator: Dr. Goyal Ashish Om…	Site 1 : ACSR Govt. Medical College and Hospital ACSR Government Medical College and Hospital, GT Road, Dargamitta, Nellore 524004, Andhra Pradesh, IndiaNelloreANDHRA PRADESH. Name of principal investigator: Dr Shaik Noushad Ali. Site 2 : Aster Aadhar Hospital R.S. No. 628, B Ward, Near KMT Workshop, Shastri Nagar, Kolhapur, Maharashtra, India 416012KolhapurMAHARASHTRA. Name of principal investig…	4	45	4	4	45	4
Sr. No. 70 CT-09-22-Cliantha.pdf .txt.csv	72741	CTRI/2022/08/044713 [Registered on: 17/08/2022] Trial Registered Prospectively	1.Medstar Speciality Hospital, #641/17/1/3, Kodigehalli Main Road, Sahakarnagar, Bangalore-560092, Karnataka, India Medstar Speciality Hospital Ethics Committee, Medstar Speciality Hospital, #641/17/1/3, Kodigehalli Main Road, Sahakarnagar, Bangalore-560092, Karnataka, India ECR/1324/Inst/KA/2019 Dr. Ambrish C 2.Department of General Medicine, Nil Ratan Sircar Medical College and Hospital, 138 A.…	Site 1 : Department of General Medicine Nil Ratan Sircar Medical College and Hospital Clinical Research Room, 1st floor- UNB building , Nil Ratan Sircar Medical college & Hospital, 138 A.J.C Bose Road, Kolkata 700014 West Bengal, IndiaKolkataWEST BENGAL. Name of principal investigator: Dr Badal Sahu. Site 2 : Lakshmi Nurshing Home Clincial Research Room, Ground floor, Lakshmi Nurshing Home , Pala…	5	5	5	5	5	5
Sr. No. 6 CT-81-22-Ms. pfizer.pdf .txt.csv	73474	CTRI/2023/01/049349 [Registered on: 31/01/2023] Trial Registered Prospectively	- Bhakti Vedanta Hospital & Research Institute, Bhakti Vedanta Swami Marg, Shrishti Complex, Mira-Road (E) Thane, Maharashtra, India-401-107. Ethics committee details: Bhakti Vedanta Hospital Ethics Committee, Bhakti Vedanta HEC Office, 6th Floor, Bhakti Vedanta Swami Marg, Shrishti Complex, Mira-Road (E) Thane, Maharashtra, India-401-107. ECR/396/Inst/MH/2013/RR-19. Name of the investigator: Dr.…	Site 1 : Bhaktivedanta Hospital & Research Institute Medical Research Department, OncologyDivision OPD 3, 1st floor,Srishti Complex, Bhaktivedanta Swami Marg, Mira Road (East) Thane 401107 MumbaiMAHARASHTRA. Name of principal investigator: Nirmal Raut. Site 2 : Healthcare Global Enterprises Limited Clinical Research Dept., Oncology Division, Tower 4, 5th floor, room No 8, P Kalinga Rao Road, Samp…	4	4	4	4	4	4
Sr. No. 17 Ct-78-22-M.s. Star Genomics.pdf .txt.csv	75367	CTRI/2023/04/051609 [Registered on: 13/04/2023] Trial Registered Prospectively	"1. Name and address of clinical trial site: Room No. 313, Third Main OPD building, Dept. of Medical Oncology VMMC & Safdarjung Hospital, New Delhi-110029. Ethics Committee Details: Institutional Ethics Committee, Room No. 516, 5th Floor, Main OPD Building, VMMC & Safdarjung Hospital, New Delhi-110029. Name of Investigator: Dr. Kaushhal Kalra.", "2. Name and address of clinical trial site: Daycar…	Site 1 : DayCare Angels Under Advani Olickal Healthcare Daycare angels Under Advani Olickal healthcare 3rd Flr Sushrut Hospital and Research Center 365 Swastik Park Chembur (East) Mumbai 400071Mumbai (Suburban)MAHARASHTRA. Name of principal investigator: Dr Sangeeta Jiwatani. Site 2 : Health Care Global Enterprises Limited HCG- Towers #8 P.Kalinga Rao Road Sampangiram Nagar Bangalore Karnataka - …	4	4	4	4	4	4
Sr.No. 92 CT-79-22-Ms. IRInnovate-CTNOC.pdf .txt.csv	75973	CTRI/2022/12/048223 [Registered on: 19/12/2022] Trial Registered Prospectively	1. Tata Memorial Hospital, Dr. Ernest Borges Road, Parel, Mumbai-400012, Maharashtra Institutional Ethics Committee- I and II, Tata Memorial Hospital,3rd Floor, Tata Memorial Hospital, Main Building, Dr. Ernest Borges Road, Parel, Mumbai-400012, Maharashtra ECR/170/Inst/MH/2013/RR-22 ECR/414/Inst/MH/2013/RR-19 Dr.Prabhat Ghanshyam Bhargava 2. Deenanath Mangeshkar Hospital and Research Center, Era…	Site 1 : All India Institute of Medical Sciences Sri Aurobindo Marg, Ansari Nagar, Ansari Nagar East, New Delhi, Delhi 110029EastDELHI. Name of principal investigator: Dr Sameer Rastogi. Site 2 : Deenanath Mangeshkar Hospital & Research Centre Off Karve Road Erandawane Pune Pune Maharashtra - 411004 IndiaPuneMAHARASHTRA. Name of principal investigator: Dr Chetan Deshmukh. Site 3 : HCG Manavata Ca…	6	9	5	6	9	5
Sr. No. 41 Ct-143-22-Novartis.pdf .txt.csv	77978	CTRI/2023/05/052406 [Registered on: 09/05/2023] Trial Registered Prospectively	" :", "- Nil Ratan Sircar Medical College and Hospital, 138, Acharya Jagadish Chandra Bose Road, Kolkata, West Bengal - 700014.\nEthics committee details: Institutional Ethics Committee, Office of Principal, Nil Ratan Sircar Medical College and Hospital, 138, Acharya Jagadish Chandra Bose Road, Kolkata, West Bengal – 700014. ECR/609/Inst/WB/2014/RR-20. Name of the investigator: Dr. Tuphan Kanti D…	Site 1 : IMS & SUM Hospital Department of Hematology,Kalinga Nagar, Ghatikia, Bhubaneswar, 751003 BhadrakORISSA. Name of principal investigator: Dr Priyanka Samal. Site 2 : Nil Ratan Sircar Medical College and Hospital Department of Hematology 138, Acharya Jagadish Chandra Bose Road, Kolkata, West Bengal- 700014KolkataWEST BENGAL. Name of principal investigator: Dr Tuphan Kanti Dolai. Site 3 : Po…	3	3	3	3	3	3
Sr. No. 11 CT-125-22-PSI CRO.pdf .txt.csv	80411	CTRI/2023/05/052163 [Registered on: 01/05/2023] Trial Registered Prospectively	"1. Fortis Hospital, B-22, Sector-62, Noida, Uttar Pradesh, 201301, India. Ethics committee details: Fortis Hospital Institutional Ethics Committee. ECR number: ECR/69/Inst/UP/2013/RR-20. Name of the investigator: Dr. Jatinder Singh Bhogal. "2. S.R. Kalla Memorial Gastro and General Hospital, 78-79 Dhuleshwar Garden, Behind HSBC Bank, Sardar Patel Marg, C-Scheme, Jaipur-302001, Rajasthan, India. …	Site 1 : Dayanand Medical College & Hospital Tagore Nagar, Civil Lines, Ludhiana-141001, Punjab, IndiaLudhianaPUNJAB. Name of principal investigator: Dr Ajit Sood. Site 2 : Fortis Escorts Heart Institute Okhla road, Near Sukhdev Vihar Metro Station, New Delhi, 110025, IndiaNew DelhiDELHI. Name of principal investigator: Dr Pankaj Puri. Site 3 : Fortis Hospital B-22, Sector-62, Noida U.P, India - …	8	8	8	8	8	8
Sr. No. 35 Ct-116-22-CliniRx.pdf .txt.csv	84100	CTRI/2023/05/052172 [Registered on: 01/05/2023] Trial Registered Prospectively	" :", "- Rainbow Children’s Hospital, Road No. 2, Banjara Hills, Hyderabad-500034, India. Ethics committee details: Rainbow Children’s Medicare Ethics Committee, Rainbow Children’s Hospital, Road No. 2, Banjara Hills, Hyderabad-500034, India. ECR/899/Inst/TG/2016/RR-21. Name of investigator: Dr. Lokesh Lingappa.", "- Jaslok Hospital & Research Centre, 9th floor, Pediatric Research Department, 15,…	Site 1 : AIIMS Room no 805, A wing, 8th floor, Mother & child Block, Child neurology division, Department of Pediatrics, AIIMS, New Delhi -110029, IndiaCentralDELHI. Name of principal investigator: Dr Sheffali Gulati. Site 2 : Christian Medical College Room no 910, West Block, First floor, Pediatric Neurology Unit, Department of Neurological Sciences, Christian Medical College, IDA Scudder Rd, Ve…	7	7	7	7	7	7
CT-20-2020.pdf .txt.csv	46312	CTRI/2020/09/027674 [Registered on: 08/09/2020] Trial Registered Prospectively	- Site 1: ESI Hospital, Sanathnagar, Hyderabad, Telangana Ethics Committee details: Institutional Ethics Committee ESIC Medical College and Hospital, Sanath Nagar Hyderabad Telangana – 500038. Name of Principal Investigator: Dr. Rajiv Bandaru - Site 2: PGIMS, Rohtak, Haryana Ethics Committee details: Institutional Ethics committee, PGIMS, Rohtak, Haryana ECR number: ECR/293/Inst/HR/2013/RR-19 Nam…	Site 1 : AIG Hospitals,Gachibowli,Hyderabad AIG Hospitals,CLINICAL RESESRACH DEPARTMENT ,FACILITY BLOCK,5TH FLOOR,136,PLOT NO 2/3/4/5 SURVEY ,1Mind space road,gachibowli,Hyderabad,Telanagana,500032HyderabadTELANGANA. Name of principal investigator: DrNChandrashekar. Site 2 : Meditrina Institute of Medical sciences,Nagpur 278,Meditrina Institute of Medical sciences,Central Bazar Road,Ramdaspeth,Na…	5	4	3	5	4	3
Sr. No. 47 CT-20-20-Novartis.pdf .txt.csv	41681	CTRI/2020/08/027253 [Registered on: 19/08/2020] Trial Registered Prospectively	1. Sujata Birla Hospital & Medical Research Center, Opposite to Bytco College, Nashik Pune Highway, Nashik road, Nashik 422101, Maharashtra, India. Ethics committee details: Yash Society’s Sujata Birla Hospital Ethics Committee, C/O Sujata Birla Hospital & Medical Research Center, Opposite to Bytco College, Nashik Pune Highway, Nashik road, Nashik 422101, Maharashtra, India. ECR/98/Inst/MH/2013/R…	Site 1 : Assured Care Plus Hospital 4th & 5th Floor, Star Plus Complex, Near Muktidham Temple, Nashik road, Nashik 422101,Maharashtra, IndiaNashikMAHARASHTRA. Name of principal investigator: Dr Suneel Vartak. Site 2 : K R Hospital, Attached Mysore Medical College and Research Institute Department of Dermatology, Irwin Road, Mysore-570001, Karnataka, IndiaMysoreKARNATAKA. Name of principal investi…	8	8	7	8	8	7
Sr. No. 45 Ct-19-20-PPD.pdf .txt.csv	42740	CTRI/2020/10/028718 [Registered on: 29/10/2020] Trial Registered Prospectively	1. Jaslok Hospital & Research Centre, Peddar Road, Mumbai-400026 Ethics committee details: Ethics Committee, Jaslok Hospital & Research Centre, Peddar Road, Mumbai-400026 ECR number: ECR/294/lnst/MH/2013/RR-19 Name of investigator: Dr. Anaita Udwadia 2. Amrita Institute of Medical Sciences and Research Centre, AIMS Ponekkara P.O, Kochi- 682041 Ethics committee details: Institutional Ethics Commit…	Site 1 : Amrita Institute of Medical Sciences and Research Centre (AIMS) Division of Pediatric Neurology, Department of Neurology, Amrita Institute of Medical Sciences and Research Centre (AIMS), Ponekkara P.O, Kochi- 682 041ErnakulamKERALA. Name of principal investigator: Dr Vinayan Puthenveettil. Site 2 : Bharti Hospital, affiliated to Bharti Vidyapeeth Deemed to be University Medical College, …	8	10	8	8	10	8
CT-10-2020.pdf .txt.csv	42858	CTRI/2020/05/025013 [Registered on: 05/05/2020] Trial Registered Prospectively	- Clinical Trial Site 1: Name and Address: B. J. Govt. Medical College & Sassoon General Hospital, Jayprakash Narayan Road, Near Pune Railway Station, Pune 411001 Ethics Committee details: Institutional Ethics Committee, B. J. Govt. Medical College & Sassoon General Hospital, Jayprakash Narayan Road, Near Pune Railway Station, Pune 411001; ECR/280/Inst/Maha/2013/RR-19 Name of Principal Investigat…	Site 1 : Sassoon General Hospital Jai Prakash Narayan Road, Near Pune Railway Station, Pune - 411001PuneMAHARASHTRA. Name of principal investigator: Dr Sonali Salvi	1	1	1	1	1	1
CT-24-2020.pdf .txt.csv	43004	CTRI/2020/04/024846 [Registered on: 24/04/2020] Trial Registered Prospectively	- Site 1: Post Graduate Institute of Medical Education and Research, Sector Chandigarh 1600(India). Ethics Committee details: Institutional Ethics committee, Post Graduate Institute of Medical Education and Research, Sector Chandigarh 1600(India). ECR number: ECR/25/Inst/CH/2013/RR-1. Name of Principal Investigator: Dr. Inderpaul Singh. - Site 2: Sundar Lal Hospital, Institute of Medical Sciences…	Site 1 : All India institute of Medical Science, Patna Department of Pulmonary Medicine Phulwarisharif Patna 810507. Bihar. India. PatnaBIHAR. Name of principal investigator: Dr Deependra Kumar Rai. Site 2 : All India Institute of Medical Science, Raipur Great Eastern Rd, AIIMS Campus, Tatibandh, Raipur, Chhattisgarh 492099RaipurCHHATTISGARH. Name of principal investigator: Dr Md Sabah Siddiqui. …	8	6	6	8	6	6
CT-08-2020.pdf .txt.csv	43176	CTRI/2020/05/025277 [Registered on: 21/05/2020] Trial Registered Prospectively	- Clinical Trial Site 1: Post Graduate Institute of Medical Education and Research, Sector Chandigarh 1600(India) Ethics Committee details: Ethics committee, Post Graduate Institute of Medical Education and Research, Sector Chandigarh 1600(India) ECR number: ECR/25/Inst/CH/2013/RR-1 Name of Principal Investigator: Dr. Inderpaul Singh - Clinical Trial Site 2: All India Institute of Medical Science…	Site 1 : All India Institute Of Medical Sciences (AIIMS), NAGPUR Plot No 2, Sector 20, MIHAN, Nagpur- 441108NagpurMAHARASHTRA. Name of principal investigator: Dr Prashant P Joshi. Site 2 : All India Institute of Medical Sciences, Bhopal Saket Nagar, Bhopal Madhya Pradesh, India BhopalBhopalMADHYA PRADESH. Name of principal investigator: Dr Sarman Singh. Site 3 : All India Institute of Medical Sci…	3	8	3	3	8	2
CT-09-2020.pdf .txt.csv	43206	CTRI/2020/05/025271 [Registered on: 20/05/2020] Trial Registered Prospectively	- Clinical Trial Site 1: Post Graduate Institute of Medical Education and Research, Sector Chandigarh 1600(India) Ethics Committee details: Ethics committee, Post Graduate Institute of Medical Education and Research, Sector Chandigarh 1600(India) ECR number: ECR/25/Inst/CH/2013/RR-1 Name of Principal Investigator: Dr. Inderpaul Singh - Clinical Trial Site 2: All India Institute of Medical Science…	Site 1 : All lndia Institute of Medical Science, Delhi A Sri Aurobindo Marg, Ansari Nagar, Ansari Nagar East, New Delhi, Delhi 110029.New DelhiDELHI. Name of principal investigator: Dr Anant Mohan. Site 2 : AII India Institute of Medical Science, Raipur Great Eastern Rd, AIIMS Campus, Tatibandh, Raipur, Chhattisgarh 492099 Raipur CHHATTISGARHRaipurCHHATTISGARH. Name of principal investigator: Dr …	3	7	3	3	7	3
2-Deoxy-D-Glucose (2-DG).pdf .txt.csv	44369	CTRI/2020/06/025664 [Registered on: 05/06/2020] Trial Registered Prospectively	- Site 1: GSVM Medical College and Hospital, Swaroop Nagar Kanpur -208002, Uttar Pradesh, India. Investigator: Dr. Apurva Agarwal, MBBS, MD. Ethics Committee: Ethics Committee GSVM Medical College. ECR number: ECR1680/lnstlUP/2014/RR-17. - Site 2: MGM Medical College, N-6 CIDCO, Aurangabad-431003, Maharashtra, India. Investigator: Dr. Anand Nikalje, MD, MBBS. Ethics Committee: MGM Ethics Committe…	Site 1 : Aakash Healthcare Super Speciality Hospital Department of Respiratory and Sleep Medicine, Hospital Plot Rd Number 201, Sector-3 DwarkaNew DelhiDELHI. Name of principal investigator: Dr Akshay Budhraja. Site 2 : BGS Global Institute of Medical Sciences Professor and HOD, General Medicine, #67, BGS Health and Education City, Uttarhalli Road, Kengeri, Bengaluru – 560060BangaloreKARNATAKA. N…	4	12	1	4	12	1
1	44387	CTRI/2020/08/027109 [Registered on: 13/08/2020] Trial Registered Prospectively	- M S Ramaiah Medical College and Hospitals, M S Ramaiah Nagar, MSRIT Post, Bangalore-560054, Karnataka, India Ethics committee details: Ethics Committee, M S Ramaiah Medical College and Hospitals, M S Ramaiah Nagar, MSRIT Post, Bangalore-560054, Karnataka, India ECR number: ECR/215/Inst/KA/2013/RR-16 Name of investigator: Dr. T Anil Kumar - Sir Ganga Ram Hospital, Old Rajinder Nagar, New Delhi -…	Site 1 : Gadag Institute of Medical Sciences SH 6, Malasamudra, 582103GadagKARNATAKA. Name of principal investigator: Dr Jagadeesh G. Site 2 : Government medical college and Hospital Room No. 47, Department of Medicine, Hanuman Nagar, Ajni Road, Medical chowk, Ajni Nagpur 440003NagpurMAHARASHTRA. Name of principal investigator: Dr Atul Rajkondawar. Site 3 : Marudhar Hospital A-93-99, Singh Bhoomi…	5	9	2	5	9	2
Sr. No. 35 CT-07-20-Pfizer.pdf .txt.csv	44827	CTRI/2020/07/026827 [Registered on: 27/07/2020] Trial Registered Prospectively	1. Surat Institute of Digestive Sciences, Vijay Nagar Gate No-3, Besides Nirman Bhavan, Opposite Gandhi College, 395002, Surat, Gujarat, India. Ethics committee details: Surat Institute of digestive sciences EC, Surat Institute of digestive sciences, A unit of SIDS healthcare Pvt. Ltd, J J Empire Vijay Nager-3, Beside Nirmal Bhavan, Majura Gate Surat, Surat Gujarat - 395002 India. ECR/813/lnst/GJ…	Site 1 : All India Institute of Medical Sciences Ansari Nagar, New Delhi-110029, IndiaNew DelhiDELHI. Name of principal investigator: Dr Saurabh Kedia. Site 2 : Gujarat Hospital – Gastro and Vascular Centre Opposite Shree Ram Petrol Pump, Anand Mahal Road, Adajan, Surat, Gujarat, Pin-395009, IndiaSuratGUJARAT. Name of principal investigator: Dr Saumin Shah. Site 3 : Kasturba Medical College and H…	8	8	6	8	8	6
Sr. No. 53 CT-66-20- PPD.pdf .txt.csv	45488	CTRI/2020/08/027205 [Registered on: 18/08/2020] Trial Registered Prospectively	- Kasturba Hospital for Infectious Diseases, Sane Guruji Marg, Mumbai-400011, Ethics Committee: Jaslok Hospital and Research Centre, ECR/294/Inst/MH/2013/RR-19, Name of investigator: Dr. Jhaveri Ajay Bharat. - Max Smart Super Speciality Hospital, Saket (A Unit of Gujarmal Modi Hospital & Research Centre for Medical Sciences), Mandir Marg, Press Enclave Road Saket, New Delhi-110017, Ethics Committ…	Site 1 : Government Medical College and Hospital-Aurangabad Department of Medicine, Government Medical College and Hospital, Panchakki Road Aurangabad 431001, Maharashtra, India AurangabadMAHARASHTRA. Name of principal investigator: Dr Meenakshi Bhattacharya. Site 2 : Government Medical College and Hospital-Nagpur Department of Medicine, ward no 44, Government Medical College and Hospital, Medica…	9	12	8	9	12	8
Sr. No. 43 CT-23-20-AsraZeneca.pdf .txt.csv	45704	CTRI/2020/08/027208 [Registered on: 18/08/2020] Trial Registered Prospectively	- Department of Medical Oncology, Ground Floor, Indraprastha Apollo Hopsital Mathura Road, Sarita Vihar, New Delhi-110076, India; Institutional Ethics Committee, Clinical Studies Indraprastha, Apollo Hospitals, Delhi-Mathura Road, Sarita Vihar, New Delhi-110076; ECR/5/ Inst/DL/2013/RR-19; Dr. Manish Singhal - Action Cancer Hospital, A-4 Paschim Vihar, New Delhi-110063; Institutional Ethics Commit…	Site 1 : Action Cancer Hospital Dept. of Medical Oncology Room no 824, A-4 block, A6 Block, Paschim Vihar, PIN- 110063 New DelhiDELHI. Name of principal investigator: Dr Sushant Mittal. Site 2 : Artemis Hospitals Dept. of Medical Oncology Sector-51, PIN-122001 GurgaonHARYANA. Name of principal investigator: Dr Vineet Govinda Gupta. Site 3 : Indraprastha Apollo Hospitals Sarita Vihar Dept. of Medi…	6	8	6	6	8	6
Sr. No. 108 CT-115-21-PPD.pdf .txt.csv	62557	CTRI/2021/12/038474 [Registered on: 07/12/2021] Trial Registered Prospectively	"- Rajiv Gandhi Medical College and Chhatrapati Shivaji Maharaj Hospital, Thane-Belapur Road, Kalwa, Thane-400605, Maharashtra, India. Ethics committee details: Institutional Clinical Ethics Committee, Thane Municipal Corporation, Rajiv Gandhi Medical College & Chhatrapati Shivaji Maharaj Hospital, Thane Belapur Road, Kalwa Thane- 400605, Maharashtra, India. ECR number: ECR/469/Inst/MH/2013/RR-20…	Site 1 : All India Institute of Medical Sciences, Raipur Dept of Paediatrics, Room no 1111, Ground floor, All India Institute of Medical Sciences, G.E. Road, Tatibandh, Raipur-492099 (C.G.) All India Institute of Medical Sciences, G.E. Road, Tatibandh, Raipur-492099 (C.G.) RaipurCHHATTISGARH. Name of principal investigator: Dr Atul Jindal. Site 2 : Atharva Multispeciality Hospital and Research Ce…	10	10	10	10	10	8
Sr. No. 50 CT-121-20-Novo-Nordisk.pdf .txt.csv	63409	CTRI/2023/02/049474 [Registered on: 06/02/2023] Trial Registered Prospectively	- Department of Haematology, Seth GS Medical College and KEM Hospital, Parel, Mumbai-4000- Ethics Committee details: Institutional Ethics Committee-I, Seth GS Medical College and KEM Hospital, Acharya Donde Marg, Parel, Mumbai-4000 Maharashtra, India; ECR/229/Inst/MH/2013/RR-19 - Name of investigator: Dr. Chandrakala S - Department of Haematology, Christian Medical College and Hospital, Vellore-6…	Site 1 : Christian Medical College and Hospital Department of Haematology Christian Medical College and hospital Vellore Tamil Nadu IndiaVelloreTAMIL NADU. Name of principal investigator: Dr Aby Abraham. Site 2 : Christian Medical College and Hospital Haemato-Oncology and Bone Marrow (Stem Cell) Transplant Unit Brown Road Ludhiana Punjab India LudhianaPUNJAB. Name of principal investigator: Dr M …	3	5	3	3	5	3
Sr. No. 101 CT-116-21-Novartis.pdf .txt.csv	60575	CTRI/2021/11/037956 [Registered on: 11/11/2021] Trial Registered Prospectively	"1. PD Hinduja Hospital and MRC, Veer Savarkar Marg, Mahim, Mumbai - 400016\n Ethics committee details: Institutional Ethics Committee, PD Hinduja Hospital and MRC, Veer Savarkar Marg, Mahim, Mumbai - 400016\n ECR number: ECR/61/Inst/MH/2013/RR- 19 Name of investigator: Dr. Neelu Desai", "2. All India Institute of Medical Sciences, Ansari Nagar, New Delhi- 110029 Ethics committee details: Institu…	Site 1 : "Rainbow Children’s Hospital Medicare Ltd, H. No: 3-7-222/223, Sy No 51-54, Polica Station Main Road, Karkhana, Secunderabad, Telangana-500009"HyderabadTELANGANA. Name of principal investigator: Dr Ramesh Konanki. Site 2 : All India Institute of Medical Sciences Department of Pediatrics, Ansari Nagar, New Delhi- 110029New DelhiDELHI. Name of principal investigator: Dr Sheffali Gulati. Si…	3	7	3	3	7	3
